# Supplementary material for: Convenient synthesis of thiolated 2,7-disubstituted tropones via double C–N bond cleavage of tropinone derivatives
Source: Royal Society of Chemistry journal article supplement (doi:10.1039/d3ob01835k), 2023-01-01

# Convenient synthesis of thiolated 2,7-disubstituted tropones via double C–N bond cleavage of tropinone derivatives

Lei Huang, Yan Wang, Xin Liu, and Shi-Kai Tian\*

Hefei National Research Center for Physical Sciences at the Microscale, Key Laboratory of Precision and Intelligent Chemistry, and Department of Chemistry, University of Science and Technology of China, Hefei, Anhui 230026, China  
E-mail: tiansk@ustc.edu.cn

## Supporting information

### Table of contents

|                                                                                                                    |      |
|--------------------------------------------------------------------------------------------------------------------|------|
| General information.....                                                                                           | S-2  |
| Preparation of 2,4-dialkylidenetropinone-derived quaternary ammonium salts.....                                    | S-2  |
| General procedure for the reaction of 2,4-dialkylidenetropinone-derived quaternary ammonium salts with thiols..... | S-11 |
| Analytical data for the products (Schemes 2 and 3).....                                                            | S-12 |
| Scale-up reaction and synthetic transformations (Scheme 4).....                                                    | S-22 |
| Mechanistic studies (Scheme 5).....                                                                                | S-23 |
| ESI-MS analysis of the reaction mixture (Scheme 6).....                                                            | S-25 |
| References.....                                                                                                    | S-26 |
| Crystallographic data.....                                                                                         | S-26 |
| Copies of NMR spectra.....                                                                                         | S-43 |

## General information

The  $^1\text{H}$  NMR,  $^{13}\text{C}$  NMR, and  $^{19}\text{F}$  NMR spectra were recorded on Bruker AC-500 FT spectrometer (500 MHz, 125 MHz, 471 MHz) and Bruker AC-400 FT spectrometer (400 MHz, 100 MHz, 376 MHz). The chemical shifts of  $^1\text{H}$  NMR and  $^{13}\text{C}$  NMR spectra were referenced internally with tetramethylsilane ( $\delta$  H 0.00,  $\delta$  C 0.0), or residual protio solvent signals  $\text{CDCl}_3$  ( $\delta$  C 77.2),  $\text{DMSO-}d_6$  ( $\delta$  C 49.5). The chemical shifts of  $^{19}\text{F}$  NMR spectra were referenced to external trifluoroacetic acid. Chemical shifts ( $\delta$ ) and coupling constants ( $J$ ) were expressed in ppm and Hz, respectively. The following abbreviations are used in reporting NMR data: s, singlet; d, doublet; t, triplet; q, quartet; m, multiplet. High resolution mass spectra (HRMS) were recorded on a LC-TOF spectrometer (Micromass). EI-mass or ESI-mass data were acquired using a Thermo LTQ Orbitrap XL instrument equipped with an EI or an ESI source and controlled by Xcalibur software. Melting points are uncorrected. X-ray crystallography analysis of single crystals was performed on a Rigaku SuperNova single crystal X-ray diffractometer.

Chemicals were purchased from the Adamas, Energy Chemical, Acros, Accela, Alfa Aesar, and TCI, and used as received.

Abbreviations: m-CPBA = 3-chloroperbenzoic acid, DBU = diazabicyclo[5.4.0]undec-7-ene, DCM = dichloromethane, DMF = *N,N*-dimethylformamide, DMSO = dimethyl sulfoxide, Tf = trifluoromethanesulfonyl, THF = tetrahydrofuran, TMG = 1,1,3,3-Tetramethylguanidine, Ts = *p*-methylbenzenesulfonyl.

## Preparation of 2,4-dialkylidenetropinone-derived quaternary ammonium salts

### (1) Preparation of ammonium triflates **1a-l**, **1n**, and **1o**

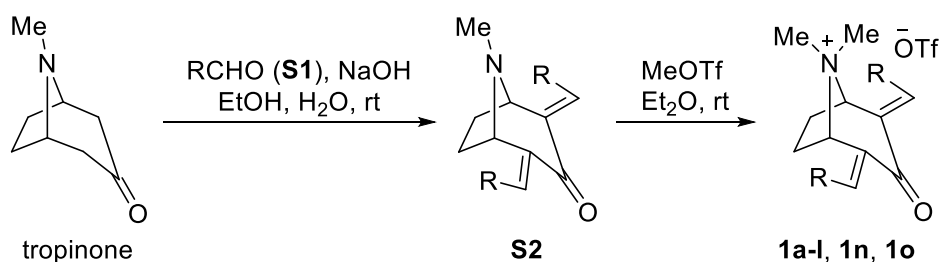

4-Formylphenyl 4-methylbenzenesulfonate (**S1g**) was prepared according to a literature procedure.<sup>1</sup>

**Condition A:** To a solution of tropinone (696 mg, 5.0 mmol) in ethanol (20 mL) were added aldehyde **S1** (11.0 mmol, 2.2 equiv) and 5% sodium hydroxide solution (10 mL). The mixture was stirred at room temperature for 2-4 h, filtered, and washed twice with ethanol. The resulting solid crude product **S2** was directly used in the next reaction without further purification.

To a solution of crude product **S2** (5.0 mmol) in anhydrous ether (20 mL) was added methyl trifluoromethanesulfonate (903 mg, 0.62 mL, 5.5 mmol, 1.1 equiv). The mixture was stirred at room

temperature for 2 h, filtered, and washed twice with anhydrous ether to give ammonium triflates **1a**, **1d**, and **1h**.

**Condition B:** Change from condition A by using tropinone (557 mg, 4.0 mmol) instead of tropinone (696 mg, 5.0 mmol) for the preparation of ammonium triflates **1b**, **1i**, **1j**, and **1o**.

**Condition C:** Change from condition A by using tropinone (418 mg, 3.0 mmol) instead of tropinone (696 mg, 5.0 mmol) for the preparation of ammonium triflates **1c**, **1e-g**, **1k**, **1l**, and **1n**.

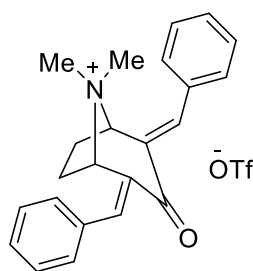

**1a**

(1*r*,5*s*)-2,4-Di((*E*)-benzylidene)-8,8-dimethyl-3-oxo-8-azabicyclo[3.2.1]octan-8-ium trifluoromethanesulfonate (**1a**) was prepared according to condition A. Yellowish solid (2.09 g, 85% yield for two steps). m.p. 204 – 208 °C. <sup>1</sup>H NMR (500 MHz, DMSO-*d*<sub>6</sub>) δ 7.96 (s, 2H), 7.60 – 7.48 (m, 10H), 5.33 – 5.25 (m, 2H), 3.33 (s, 3H), 3.16 – 3.09 (m, 2H), 3.05 (s, 3H), 2.43 (dd, *J* = 14.5, 5.5 Hz, 2H). <sup>13</sup>C NMR (125 MHz, DMSO-*d*<sub>6</sub>) δ 181.1, 140.7, 132.8, 131.6, 130.9, 130.6, 129.2, 120.8 (q, *J*<sub>C-F</sub> = 320.3 Hz), 69.5, 50.0, 45.1, 28.0. <sup>19</sup>F NMR (471 MHz, DMSO-*d*<sub>6</sub>) δ -77.77. HRMS (ESI) *m/z*: [M - OTf]<sup>+</sup> Calcd for C<sub>23</sub>H<sub>24</sub>ON<sup>+</sup> 330.1852; Found 330.1852.

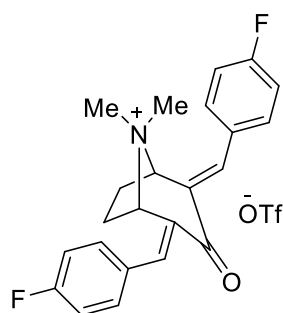

**1b**

(1*r*,5*s*)-2,4-Bis((*E*)-4-fluorobenzylidene)-8,8-dimethyl-3-oxo-8-azabicyclo[3.2.1]octan-8-ium trifluoromethanesulfonate (**1b**) was prepared according to condition B. Yellowish solid (1.32 g, 64% yield for two steps). m.p. 249 – 252 °C. <sup>1</sup>H NMR (500 MHz, DMSO-*d*<sub>6</sub>) δ 7.93 (s, 2H), 7.63 – 7.56 (m, 4H), 7.41 – 7.35 (m, 4H), 5.28 (dd, *J* = 4.5, 2.5 Hz, 2H), 3.34 (s, 3H), 3.16 – 3.09 (m, 2H), 3.05 (s, 3H), 2.46 (dd, *J* = 14.5, 5.5 Hz, 2H). <sup>13</sup>C NMR (125 MHz, DMSO-*d*<sub>6</sub>) δ 181.0, 163.3 (d, *J*<sub>C-F</sub> = 248.8 Hz), 139.6, 133.4 (d, *J*<sub>C-F</sub> = 8.8 Hz), 131.4, 129.3 (d, *J*<sub>C-F</sub> = 3.0 Hz), 120.8 (q, *J*<sub>C-F</sub> = 320.1 Hz), 116.2 (d, *J*<sub>C-F</sub> = 21.6 Hz), 69.3, 50.0, 45.1, 27.9. <sup>19</sup>F NMR (376 MHz, DMSO-*d*<sub>6</sub>) δ -77.77, -109.32. HRMS (ESI) *m/z*: [M - OTf]<sup>+</sup> Calcd for C<sub>23</sub>H<sub>22</sub>ONF<sub>2</sub><sup>+</sup> 366.1664; Found 366.1674.

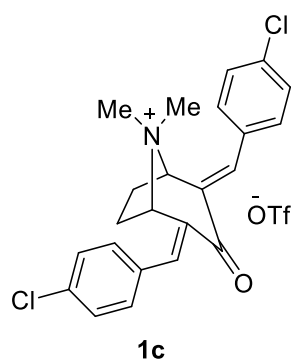

(1*r*,5*s*)-2,4-Bis((*E*)-4-chlorobenzylidene)-8,8-dimethyl-3-oxo-8-azabicyclo[3.2.1]octan-8-ium trifluoromethanesulfonate (**1c**) was prepared according to condition C. Yellowish solid (1.31 g, 79% yield for two steps). m.p. 247 – 253 °C. <sup>1</sup>H NMR (500 MHz, DMSO-*d*<sub>6</sub>) δ 7.94 (s, 2H), 7.61 (d, *J* = 8.5 Hz, 4H), 7.54 (d, *J* = 8.5 Hz, 4H), 5.28 – 5.20 (m, 2H), 3.29 (s, 3H), 3.11 – 3.04 (m, 2H), 3.01 (s, 3H), 2.44 (dd, *J* = 14.5, 5.5 Hz, 2H). <sup>13</sup>C NMR (125 MHz, DMSO-*d*<sub>6</sub>) δ 181.0, 139.5, 135.3, 132.5, 132.1, 131.6, 129.1, 120.7 (q, *J*<sub>C-F</sub> = 320.3 Hz), 69.2, 50.0, 45.1, 27.8. <sup>19</sup>F NMR (471 MHz, DMSO-*d*<sub>6</sub>) δ -77.77. HRMS (ESI) *m/z*: [M - OTf]<sup>+</sup> Calcd for C<sub>23</sub>H<sub>22</sub>ONCl<sub>2</sub><sup>+</sup> 398.1073; Found 398.1068.

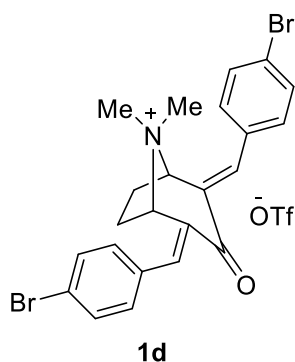

(1*r*,5*s*)-2,4-Bis((*E*)-4-bromobenzylidene)-8,8-dimethyl-3-oxo-8-azabicyclo[3.2.1]octan-8-ium trifluoromethanesulfonate (**1d**) was prepared according to condition A. Yellowish solid (2.84 g, 86% yield for two steps). m.p. 247 – 249 °C. <sup>1</sup>H NMR (500 MHz, DMSO-*d*<sub>6</sub>) δ 7.92 (s, 2H), 7.75 (d, *J* = 8.5 Hz, 4H), 7.46 (d, *J* = 8.5 Hz, 4H), 5.21 (dd, *J* = 4.5, 2.5 Hz, 2H), 3.27 (s, 3H), 3.07 – 3.02 (m, 2H), 3.00 (s, 3H), 2.44 (dd, *J* = 14.5, 5.5 Hz, 2H). <sup>13</sup>C NMR (125 MHz, DMSO-*d*<sub>6</sub>) δ 181.0, 139.6, 132.7, 132.2, 132.04, 131.98, 124.2, 120.7 (q, *J*<sub>C-F</sub> = 320.3 Hz), 69.2, 49.9, 45.1, 27.7. <sup>19</sup>F NMR (471 MHz, DMSO-*d*<sub>6</sub>) δ -77.77. HRMS (ESI) *m/z*: [M - OTf]<sup>+</sup> Calcd for C<sub>23</sub>H<sub>22</sub>ONBr<sub>2</sub><sup>+</sup> 486.0063; Found 486.0059.



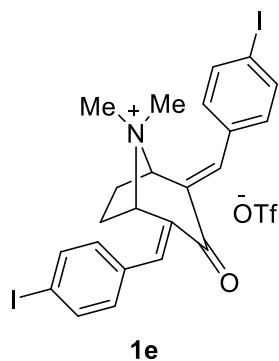

(1*r*,5*s*)-2,4-Bis((*E*)-4-iodobenzylidene)-8,8-dimethyl-3-oxo-8-azabicyclo[3.2.1]octan-8-ium trifluoromethanesulfonate (**1e**) was prepared according to condition C. Yellowish solid (1.83 g, 83% yield for two steps). m.p. 230 – 232 °C. <sup>1</sup>H NMR (400 MHz, DMSO-*d*<sub>6</sub>) δ 7.90 (d, *J* = 8.4 Hz, 4H), 7.85 (s, 2H), 7.26 (d, *J* = 8.4 Hz, 4H), 5.21 (dd, *J* = 5.5, 3.0 Hz, 2H), 3.28 (s, 3H), 3.10 – 3.02 (m, 2H), 2.99 (s, 3H), 2.43 (dd, *J* = 17.5, 6.5 Hz, 2H). <sup>13</sup>C NMR (100 MHz, DMSO-*d*<sub>6</sub>) δ 180.8, 139.9, 137.9, 132.4, 132.1, 132.0, 120.7 (q, *J*<sub>C-F</sub> = 320.3 Hz), 98.1, 69.2, 49.9, 45.1, 27.8. <sup>19</sup>F NMR (471 MHz, DMSO-*d*<sub>6</sub>) δ -77.76. HRMS (ESI) *m/z*: [M - OTf]<sup>+</sup> Calcd for C<sub>23</sub>H<sub>22</sub>ONI<sub>2</sub><sup>+</sup> 581.9785; Found 581.9773.

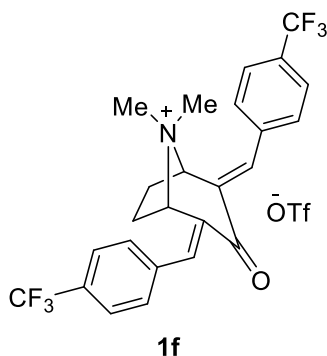

(1*r*,5*s*)-8,8-Dimethyl-3-oxo-2,4-bis((*E*)-4-(trifluoromethyl)benzylidene)-8-azabicyclo[3.2.1]octan-8-ium trifluoromethanesulfonate (**1f**) was prepared according to condition C. Yellow solid (1.14 g, 62% yield for two steps). m.p. 234 – 238 °C. <sup>1</sup>H NMR (400 MHz, DMSO-*d*<sub>6</sub>) δ 8.01 (s, 2H), 7.88 (d, *J* = 8.0 Hz, 4H), 7.71 (d, *J* = 8.0 Hz, 4H), 5.32 – 5.21 (m, 2H), 3.31 (s, 3H), 3.19 – 3.09 (m, 2H), 3.05 (s, 3H), 2.57 (dd, *J* = 17.5, 6.5 Hz, 2H). <sup>13</sup>C NMR (100 MHz, DMSO-*d*<sub>6</sub>) δ 181.0, 139.5, 136.8, 133.3, 131.3, 130.1 (q, *J*<sub>C-F</sub> = 31.9 Hz), 125.8 (q, *J*<sub>C-F</sub> = 3.9 Hz), 124.0 (q, *J*<sub>C-F</sub> = 270.6 Hz), 120.8 (q, *J*<sub>C-F</sub> = 320.1 Hz), 69.3, 50.0, 45.3, 27.9. <sup>19</sup>F NMR (376 MHz, DMSO-*d*<sub>6</sub>) δ -61.42, -77.81. HRMS (ESI) *m/z*: [M - OTf]<sup>+</sup> Calcd for C<sub>25</sub>H<sub>22</sub>ONF<sub>6</sub><sup>+</sup> 466.1600; Found 466.1589.

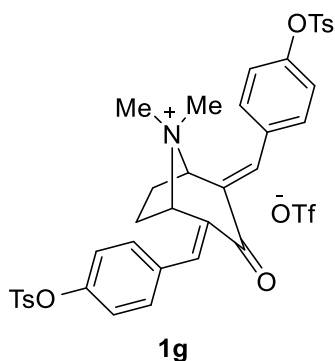

(1*r*,5*s*)-8,8-Dimethyl-3-oxo-2,4-bis((*E*)-4-(tosyloxy)benzylidene)-8-azabicyclo[3.2.1]octan-8-ium trifluoromethanesulfonate (**1g**) was prepared according to condition C. Yellow solid (1.08 g, 44% yield for two steps). m.p. 175 – 177 °C. <sup>1</sup>H NMR (500 MHz, DMSO-*d*<sub>6</sub>) δ 7.92 (s, 2H), 7.84 (d, *J* = 8.0 Hz, 4H), 7.58 (d, *J* = 8.0 Hz, 4H), 7.52 (d, *J* = 8.0 Hz, 4H), 7.25 (d, *J* = 8.0 Hz, 4H), 5.26 – 5.21 (m, 2H), 3.31 (s, 3H), 3.14 – 3.07 (m, 2H), 3.05 (s, 3H), 2.45 (s, 6H), 2.39 (dd, *J* = 14.5, 5.5 Hz, 2H). <sup>13</sup>C NMR (125 MHz, DMSO-*d*<sub>6</sub>) δ 181.0, 150.2, 146.2, 139.3, 132.9, 132.1, 131.9, 131.6, 130.5, 128.3, 122.7, 120.8 (q, *J*<sub>C-F</sub> = 320.1 Hz), 69.3, 50.1, 45.2, 27.8, 21.3. <sup>19</sup>F NMR (471 MHz, DMSO-*d*<sub>6</sub>) δ -77.72. HRMS (ESI) *m/z*: [M - OTf]<sup>+</sup> Calcd for C<sub>37</sub>H<sub>36</sub>ONS<sub>2</sub><sup>+</sup> 670.1928; Found 670.1918.

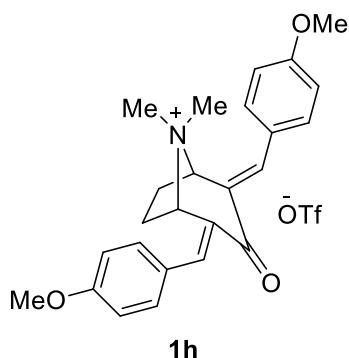

(1*r*,5*s*)-2,4-Bis((*E*)-4-methoxybenzylidene)-8,8-dimethyl-3-oxo-8-azabicyclo[3.2.1]octan-8-ium trifluoromethanesulfonate (**1h**) was prepared according to condition A. Yellow solid (1.54 g, 57% yield for two steps). m.p. 231 – 233 °C. <sup>1</sup>H NMR (400 MHz, DMSO-*d*<sub>6</sub>) δ 7.88 (s, 2H), 7.50 (d, *J* = 8.8 Hz, 4H), 7.11 (d, *J* = 8.8 Hz, 4H), 5.28 (dd, *J* = 5.5, 2.5 Hz, 2H), 3.84 (s, 6H), 3.32 (s, 3H), 3.12 – 3.08 (m, 2H), 3.02 (s, 3H), 2.37 (dd, *J* = 17.5, 6.5 Hz, 2H). <sup>13</sup>C NMR (100 MHz, DMSO-*d*<sub>6</sub>) δ 180.8, 161.3, 140.1, 133.1, 129.6, 125.3, 120.7 (q, *J*<sub>C-F</sub> = 320.3 Hz), 114.7, 69.4, 55.5, 50.0, 45.0, 27.9. <sup>19</sup>F NMR (376 MHz, DMSO-*d*<sub>6</sub>) δ -77.77. HRMS (ESI) *m/z*: [M - OTf]<sup>+</sup> Calcd for C<sub>25</sub>H<sub>28</sub>O<sub>3</sub>N<sup>+</sup> 390.2064; Found 390.2059.

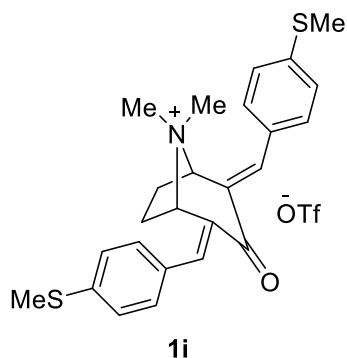

(1*r*,5*s*)-8,8-Dimethyl-2,4-bis((*E*)-4-(methylthio)benzylidene)-3-oxo-8-azabicyclo[3.2.1]octan-8-ium trifluoromethanesulfonate (**1i**) was prepared according to condition B. Yellow solid (1.57 g, 69% yield for two steps). m.p. 233 – 234 °C. <sup>1</sup>H NMR (500 MHz, DMSO-*d*<sub>6</sub>) δ 7.87 (s, 2H), 7.44 (d, *J* = 8.5 Hz, 4H), 7.39 (d, *J* = 8.5 Hz, 4H), 5.26 (dd, *J* = 4.5, 2.5 Hz, 2H), 3.30 (s, 3H), 3.12 – 3.04 (m, 2H), 3.01 (s, 3H), 2.54 (s, 6H), 2.39 (dd, *J* = 14.5, 5.5 Hz, 2H). <sup>13</sup>C NMR (125 MHz, DMSO-*d*<sub>6</sub>) δ 180.8, 142.6, 140.1, 131.4, 130.8, 128.9, 125.5, 120.7 (q, *J*<sub>C-F</sub> = 320.3 Hz), 69.4, 50.0, 45.0, 27.9, 14.1. <sup>19</sup>F NMR (376 MHz, DMSO-*d*<sub>6</sub>) δ -77.77. HRMS (ESI) *m/z*: [M - OTf]<sup>+</sup> Calcd for C<sub>25</sub>H<sub>28</sub>ONS<sub>2</sub><sup>+</sup> 422.1607; Found 422.1597.

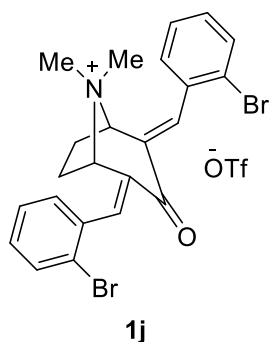

(1*r*,5*s*)-2,4-Bis((*E*)-2-bromobenzylidene)-8,8-dimethyl-3-oxo-8-azabicyclo[3.2.1]octan-8-ium trifluoromethanesulfonate (**1j**) was prepared according to condition B. Yellow solid (1.70 g, 67% yield for two steps). m.p. 200 – 202 °C. <sup>1</sup>H NMR (400 MHz, DMSO-*d*<sub>6</sub>) δ 7.97 (s, 2H), 7.81 (d, *J* = 8.0 Hz, 2H), 7.59 (t, *J* = 7.2 Hz, 2H), 7.47 (t, *J* = 7.6 Hz, 2H), 7.35 (d, *J* = 7.2 Hz, 2H), 5.10 – 5.01 (m, 2H), 3.28 (s, 3H), 3.09 (s, 3H), 3.06 – 2.97 (m, 2H), 2.50 (dd, *J* = 14.0, 5.2 Hz, 2H). <sup>13</sup>C NMR (100 MHz, DMSO-*d*<sub>6</sub>) δ 181.3, 140.0, 133.1, 132.89, 132.85, 131.9, 131.0, 128.3, 124.6, 120.7 (q, *J*<sub>C-F</sub> = 320.1 Hz), 69.3, 49.8, 45.1, 27.7. <sup>19</sup>F NMR (376 MHz, DMSO-*d*<sub>6</sub>) δ -77.77. HRMS (ESI) *m/z*: [M - OTf]<sup>+</sup> Calcd for C<sub>23</sub>H<sub>22</sub>ONBr<sub>2</sub><sup>+</sup> 486.0063; Found 486.0058.

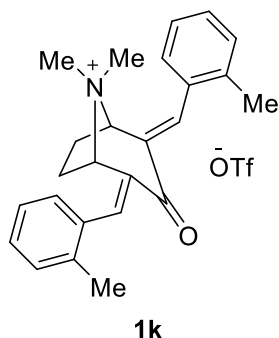

(1*r*,5*s*)-8,8-Dimethyl-2,4-bis((*E*)-2-methylbenzylidene)-3-oxo-8-azabicyclo[3.2.1]octan-8-ium trifluoromethanesulfonate (**1k**) was prepared according to condition C. Yellow solid (911 mg, 60% yield for two steps). m.p. 184 – 186 °C. <sup>1</sup>H NMR (500 MHz, DMSO-*d*<sub>6</sub>) δ 8.07 (s, 2H), 7.45 – 7.40 (m, 2H), 7.40 – 7.33 (m, 4H), 7.17 – 7.11 (m, 2H), 5.00 – 4.90 (m, 2H), 3.23 (s, 3H), 3.05 (s, 3H), 3.00 – 2.91 (m, 2H), 2.47 (dd, *J* = 14.5, 5.5 Hz, 2H), 2.35 (s, 6H). <sup>13</sup>C NMR (125 MHz, DMSO-*d*<sub>6</sub>) δ 181.7, 140.0, 138.4, 132.4, 132.2, 130.6, 130.2, 129.1, 126.3, 120.7 (q, *J*<sub>C-F</sub> = 320.1 Hz), 69.6, 49.8, 45.1, 27.9, 19.8. <sup>19</sup>F NMR (471 MHz, DMSO-*d*<sub>6</sub>) δ -77.75. HRMS (ESI) *m/z*: [M - OTf]<sup>+</sup> Calcd for C<sub>25</sub>H<sub>28</sub>ON<sup>+</sup> 358.2165; Found 358.2161.

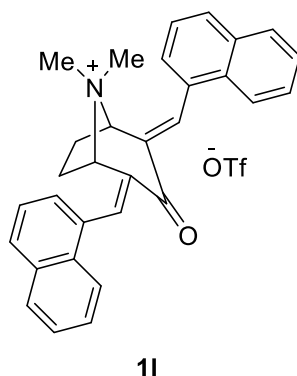

(1*r*,5*s*)-8,8-Dimethyl-2,4-bis((*E*)-naphthalen-1-ylmethylene)-3-oxo-8-azabicyclo[3.2.1]octan-8-ium trifluoromethanesulfonate (**1l**) was prepared according to condition C. Yellow solid (933 mg, 53% yield for two steps). m.p. 203 – 204 °C. <sup>1</sup>H NMR (500 MHz, DMSO-*d*<sub>6</sub>) δ 8.58 (s, 2H), 8.18 – 8.01 (m, 6H), 7.76 – 7.62 (m, 6H), 7.42 (d, *J* = 7.0 Hz, 2H), 5.13 – 5.01 (m, 2H), 3.18 (s, 3H), 3.08 (s, 3H), 3.05 – 2.97 (m, 2H), 2.66 – 2.55 (m, 2H). <sup>13</sup>C NMR (125 MHz, DMSO-*d*<sub>6</sub>) δ 181.7, 139.1, 133.9, 133.3, 131.5, 130.5, 130.1, 128.8, 128.0, 127.4, 126.9, 125.7, 124.4, 120.8 (q, *J*<sub>C-F</sub> = 320.3 Hz), 69.8, 49.7, 45.1, 27.9. <sup>19</sup>F NMR (471 MHz, DMSO-*d*<sub>6</sub>) δ -77.69. HRMS (ESI) *m/z*: [M - OTf]<sup>+</sup> Calcd for C<sub>31</sub>H<sub>28</sub>ON<sup>+</sup> 430.2165; Found 430.2156.

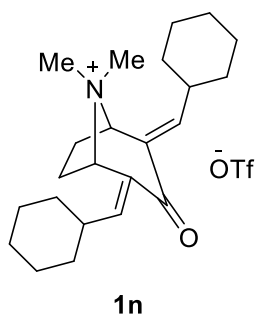

(1*r*,5*s*)-2,4-Bis(*E*)-cyclohexylmethylene)-8,8-dimethyl-3-oxo-8-azabicyclo[3.2.1]octan-8-ium trifluoromethanesulfonate (**1n**) was prepared according to condition C. White solid (676 mg, 45% yield for two steps). m.p. 230 – 232 °C. <sup>1</sup>H NMR (500 MHz, DMSO-*d*<sub>6</sub>) δ 6.75 – 6.70 (m, 2H), 5.10 (dd, *J* = 4.5, 2.5 Hz, 2H), 3.30 (s, 3H), 2.98 (s, 3H), 2.81 – 2.73 (m, 2H), 2.55 – 2.45 (m, 2H), 2.43 (dd, *J* = 14.5, 5.5 Hz, 2H), 1.75 – 1.68 (m, 4H), 1.68 – 1.62 (m, 4H), 1.55 – 1.47 (m, 2H), 1.39 – 1.27 (m, 4H), 1.25 – 1.14 (m, 6H). <sup>13</sup>C NMR (125 MHz, DMSO-*d*<sub>6</sub>) δ 181.8, 149.6, 131.5, 120.7 (q, *J*<sub>C-F</sub> = 320.3 Hz), 69.0, 49.6, 45.3, 35.8, 31.3, 31.0, 28.0, 25.2, 24.8, 24.6. <sup>19</sup>F NMR (471 MHz, DMSO-*d*<sub>6</sub>) δ -77.78. HRMS (ESI) *m/z*: [M - OTf]<sup>+</sup> Calcd for C<sub>23</sub>H<sub>36</sub>ON<sup>+</sup> 342.2791; Found 342.2786.

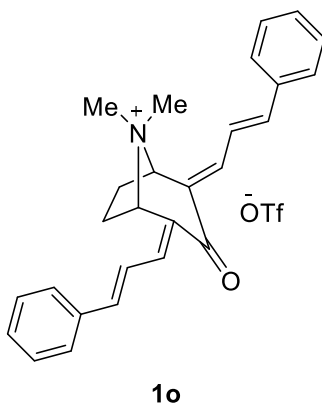

(1*r*,2*E*,4*E*,5*s*)-8,8-Dimethyl-3-oxo-2,4-bis(*E*)-3-phenylallylidene)-8-azabicyclo[3.2.1]octan-8-ium trifluoromethanesulfonate (**1o**) was prepared according to condition B. Yellow solid (1.02 g, 48% yield for two steps). m.p. 183 – 187 °C. <sup>1</sup>H NMR (500 MHz, DMSO-*d*<sub>6</sub>) δ 7.76 – 7.71 (m, 4H), 7.58 – 7.54 (m, 2H), 7.47 – 7.39 (m, 8H), 7.36 – 7.31 (m, 2H), 5.57 – 5.53 (m, 2H), 3.41 (s, 3H), 3.09 (s, 3H), 2.92 – 2.85 (m, 2H), 2.02 (dd, *J* = 14.5, 5.5 Hz, 2H). <sup>13</sup>C NMR (125 MHz, DMSO-*d*<sub>6</sub>) δ 181.0, 145.6, 139.7, 135.9, 131.3, 130.0, 128.9, 128.1, 122.2, 120.8 (q, *J*<sub>C-F</sub> = 320.0 Hz), 69.5, 49.9, 45.6, 28.2. <sup>19</sup>F NMR (376 MHz, DMSO-*d*<sub>6</sub>) δ -77.78. HRMS (ESI) *m/z*: [M - OTf]<sup>+</sup> Calcd for C<sub>27</sub>H<sub>28</sub>ON<sup>+</sup> 382.2165; Found 382.2173.

## (2) Preparation of ammonium triflate **1m**

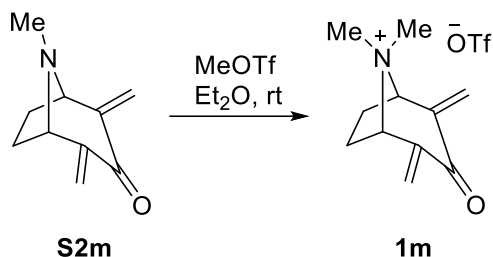

2,4-Dimethylidenetropinone **S2m** was prepared according to a literature procedure.<sup>2</sup>

To a solution of 2,4-dimethylidenetropinone **S2m** (196 mg, 1.2 mmol, 1.0 equiv) in anhydrous ether (10 mL) was added methyl trifluoromethanesulfonate (216 mg, 0.15 mL, 1.3 mmol, 1.1 equiv). The mixture was stirred at room temperature for 2 h, filtered, and washed twice with anhydrous ether to give (1*r*,5*s*)-8,8-dimethyl-2,4-dimethylene-3-oxo-8-azabicyclo[3.2.1]octan-8-ium trifluoromethanesulfonate (**1m**) as a white solid (357 mg, 90% yield). m.p. 156 – 160 °C. <sup>1</sup>H NMR (500 MHz, DMSO-*d*<sub>6</sub>) δ 6.33 (s, 2H), 5.85 (s, 2H), 4.96 (dd, *J* = 4.5, 2.5 Hz, 2H), 3.25 (s, 3H), 3.06 (s, 3H), 2.80 – 2.67 (m, 2H), 2.07 (dd, *J* = 14.5, 5.5 Hz, 2H). <sup>13</sup>C NMR (125 MHz, DMSO-*d*<sub>6</sub>) δ 182.1, 140.3, 128.4, 120.7 (q, *J*<sub>C-F</sub> = 320.0 Hz), 73.6, 49.4, 45.8, 27.3. <sup>19</sup>F NMR (471 MHz, DMSO-*d*<sub>6</sub>) δ -77.78. HRMS (ESI) *m/z*: [M - OTf]<sup>+</sup> Calcd for C<sub>11</sub>H<sub>16</sub>ON<sup>+</sup> 178.1226; Found 178.1223.

### (3) Preparation of ammonium triflate **1p**

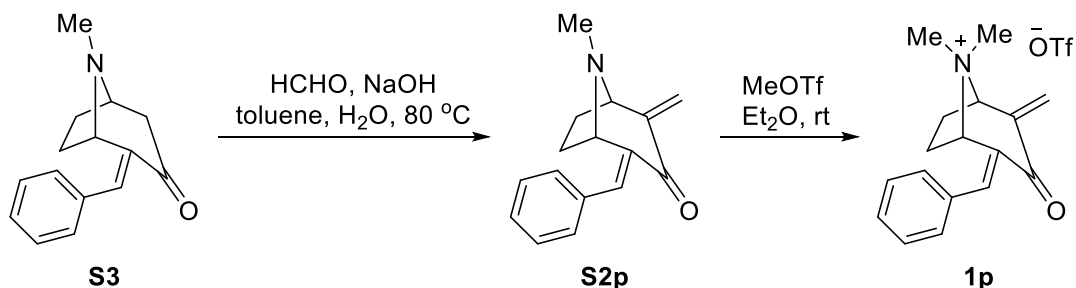

2-Benzylidenetropinone **S3** was prepared according to a literature procedure.<sup>3</sup>

To a solution of 2-benzylidenetropinone **S3** (455 mg, 2.0 mmol) in toluene (15 mL) were added paraformaldehyde (1.08 g, 12.0 mmol, 6.0 equiv) and 5% sodium hydroxide solution (25 mL). The mixture was heated at 80 °C for 5 h, and cooled to room temperature. The mixture was extracted twice with dichloromethane (20 mL), and the combined extracts were washed with saturated brine, and dried over anhydrous sodium sulfate. After the solvent was evaporated under reduced pressure, the residue was purified by silica gel chromatography (eluent: petroleum ether/ethyl acetate = 2/1) to give 2-methylene-4-phenylmethylene-3-tropinone (**S2p**) as a yellow oil (468 mg, 76% yield). <sup>1</sup>H NMR (500 MHz, CDCl<sub>3</sub>) δ 7.78 (s, 1H), 7.46 – 7.40 (m, 2H), 7.39 – 7.33 (m, 3H), 6.24 (d, *J* = 2.0 Hz, 1H), 5.32 (d, *J* = 2.0 Hz, 1H), 4.37 (d, *J* = 7.0 Hz, 1H), 3.95 (d, *J* = 7.0 Hz, 1H), 2.54 – 2.42 (m, 2H), 2.34 (s, 3H), 1.96 – 1.89 (m, 1H), 1.82 – 1.75 (m, 1H). <sup>13</sup>C NMR (125 MHz, CDCl<sub>3</sub>) δ 188.2, 146.2, 138.5,

137.3, 135.1, 130.3, 129.0, 128.7, 121.8, 65.3, 60.9, 35.7, 30.5, 30.4. HRMS (ESI)  $m/z$ :  $[M+H]^+$  Calcd for  $C_{16}H_{18}ON^+$  240.1383; Found 240.1387.

To a solution of 2,4-dialkylidenetropinone **S2p** (479 mg, 2.0 mmol, 1.0 equiv) in anhydrous ether (10 mL) was added methyl trifluoromethanesulfonate (368 mg, 0.25 mL, 2.2 mmol, 1.1 equiv). The mixture was stirred at room temperature for 2 h, filtered, and washed twice with anhydrous ether to give (1*r*,5*s*)-2-(*E*)-benzylidene-8,8-dimethyl-4-methylene-3-oxo-8-azabicyclo[3.2.1]octan-8-ium trifluoromethanesulfonate (**1p**) as a yellow solid (651 mg, 86% yield). m.p. 172 – 175 °C.  $^1H$  NMR (500 MHz,  $DMSO-d_6$ )  $\delta$  7.91 (s, 1H), 7.60 – 7.48 (m, 5H), 6.40 (s, 1H), 5.87 (s, 1H), 5.27 (d,  $J = 6.5$  Hz, 1H), 5.00 (d,  $J = 6.5$  Hz, 1H), 3.30 (s, 3H), 3.06 (s, 3H), 3.02 – 2.94 (m, 1H), 2.93 – 2.83 (m, 1H), 2.39 – 2.29 (m, 1H), 2.22 – 2.11 (m, 1H).  $^{13}C$  NMR (125 MHz,  $DMSO-d_6$ )  $\delta$  181.6, 141.2, 140.3, 132.7, 131.6, 130.9, 130.6, 129.2, 127.9, 120.7 (q,  $J_{C-F} = 320.1$  Hz), 73.2, 69.7, 49.7, 45.5, 27.8, 27.6.  $^{19}F$  NMR (471 MHz,  $DMSO-d_6$ )  $\delta$  -77.73. HRMS (ESI)  $m/z$ :  $[M - OTf]^+$  Calcd for  $C_{17}H_{20}ON^+$  254.1539; Found 254.1545.

#### (4) Preparation of ammonium triflate **1ab**

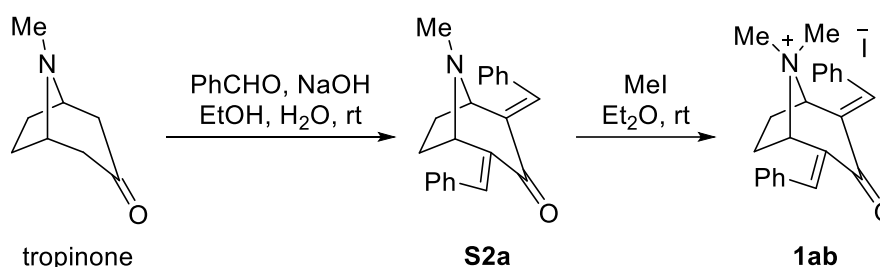

To a solution of tropinone (418 mg, 3.0 mmol) in ethanol (15 mL) were added benzaldehyde (702 mg, 672  $\mu$ L, 6.6 mmol, 2.2 equiv) and 5% sodium hydroxide solution (6.0 mL). The mixture was stirred at room temperature for 2 h, filtered, and washed twice with ethanol. The resulting solid crude product **S2a** was directly used in the next reaction without further purification.

To a solution of crude product **S2a** (3.0 mmol) in anhydrous ether (20 mL) was added methyl iodide (468 mg, 207  $\mu$ L, 3.3 mmol, 1.1 equiv). The mixture was stirred at room temperature for 2 h, filtered, and washed twice with anhydrous ether to give (1*r*,5*s*)-2,4-di((*E*)-benzylidene)-8,8-dimethyl-3-oxo-8-azabicyclo[3.2.1]octan-8-ium iodide (**1ab**) as a yellowish solid (673 mg, 50% yield for two steps). m.p. 240 – 242 °C.  $^1H$  NMR (400 MHz,  $DMSO-d_6$ )  $\delta$  7.98 (s, 2H), 7.60 – 7.52 (m, 10H), 5.27 (dd,  $J = 4.8, 2.8$  Hz, 2H), 3.33 (s, 3H), 3.17 – 3.09 (m, 2H), 3.05 (s, 3H), 2.45 (dd,  $J = 14.4, 5.6$  Hz, 2H).  $^{13}C$  NMR (100 MHz,  $DMSO-d_6$ )  $\delta$  181.1, 140.6, 132.7, 131.6, 130.9, 130.5, 129.2, 69.3, 50.1, 45.1, 28.0. HRMS (ESI)  $m/z$ :  $[M - I]^+$  Calcd for  $C_{23}H_{24}ON^+$  330.1852; Found 330.1854.

#### General procedure for the reaction of 2,4-dialkylidenetropinone-derived quaternary ammonium salts with thiols

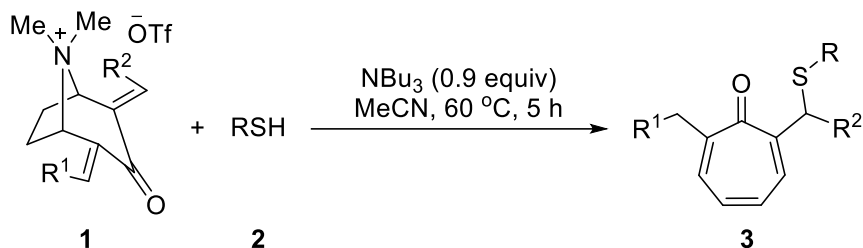

A mixture of 2,4-dialkylidenetropinone-derived quaternary ammonium salt **1** (0.20 mmol), thiol **2** (0.30 mmol), and tributylamine (33.4 mg, 43.0  $\mu$ L, 0.18 mmol) in acetonitrile (1.2 mL) was heated in a sealed tube at 60  $^{\circ}$ C for 5 h, and cooled to room temperature. The mixture was directly purified by silica gel chromatography, using petroleum ether/ethyl acetate (5/1 ~ 25/1) as the eluent, to give tropone **3**.

### Analytical data for the products (Schemes 2 and 3)

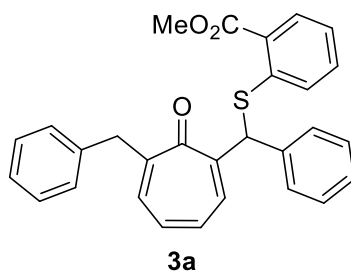

Methyl 2-(((6-benzyl-7-oxocyclohepta-1,3,5-trien-1-yl)(phenyl)methyl)thio)benzoate (**3a**). White solid (78.1 mg, 86% yield). m.p. 95 – 96  $^{\circ}$ C.  $^1$ H NMR (500 MHz,  $\text{CDCl}_3$ )  $\delta$  7.95 (dd,  $J$  = 8.0, 1.5 Hz, 1H), 7.78 (dd,  $J$  = 8.0, 1.5 Hz, 1H), 7.51 – 7.47 (m, 2H), 7.31 – 7.26 (m, 4H), 7.25 – 7.21 (m, 2H), 7.21 – 7.16 (m, 3H), 7.12 – 7.04 (m, 3H), 6.95 – 6.90 (m, 1H), 6.90 – 6.85 (m, 1H), 6.45 (s, 1H), 4.06 (d,  $J$  = 16.0 Hz, 1H), 4.01 (d,  $J$  = 16.0 Hz, 1H), 3.89 (s, 3H).  $^{13}$ C NMR (125 MHz,  $\text{CDCl}_3$ )  $\delta$  184.6, 167.0, 153.3, 150.3, 141.8, 139.3, 139.2, 136.0, 135.5, 133.3, 132.8, 132.1, 131.3, 129.5, 128.9, 128.8, 128.7, 127.6, 126.7, 126.5, 126.4, 124.1, 52.3, 50.6, 41.5. HRMS (ESI)  $m/z$ :  $[\text{M}+\text{H}]^+$  Calcd for  $\text{C}_{29}\text{H}_{25}\text{O}_3\text{S}^+$  453.1519; Found 453.1525.

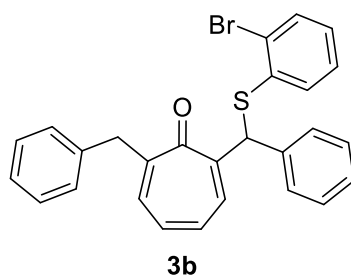

2-Benzyl-7-(((2-bromophenyl)thio)(phenyl)methyl)cyclohepta-2,4,6-trien-1-one (**3b**). Yellow oil (88.7 mg, 94% yield).  $^1$ H NMR (500 MHz,  $\text{CDCl}_3$ )  $\delta$  7.84 – 7.78 (m, 1H), 7.51 – 7.45 (m, 3H), 7.32 – 7.26 (m, 3H), 7.26 – 7.20 (m, 3H), 7.18 – 7.14 (m, 2H), 7.11 – 7.07 (m, 1H), 7.06 – 7.01 (m,



1H), 7.00 – 6.97 (m, 1H), 6.96 – 6.90 (m, 2H), 6.90 – 6.85 (m, 1H), 6.42 (s, 1H), 4.05 (d,  $J = 16.0$  Hz, 1H), 3.99 (d,  $J = 16.0$  Hz, 1H).  $^{13}\text{C}$  NMR (125 MHz,  $\text{CDCl}_3$ )  $\delta$  184.7, 153.4, 149.8, 139.2, 138.9, 137.8, 135.7, 135.4, 133.4, 132.8, 132.0, 129.5, 128.8, 128.7, 128.1, 128.0, 127.8, 126.6, 126.5, 122.1, 51.8, 41.4. HRMS (ESI)  $m/z$ :  $[\text{M}+\text{Na}]^+$  Calcd for  $\text{C}_{27}\text{H}_{21}\text{OBrNaS}^+$  495.0389; Found 495.0398.

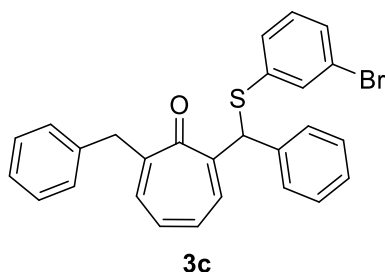

2-Benzyl-7-(((3-bromophenyl)thio)(phenyl)methyl)cyclohepta-2,4,6-trien-1-one (**3c**). Yellow oil (90.5 mg, 95% yield).  $^1\text{H}$  NMR (500 MHz,  $\text{CDCl}_3$ )  $\delta$  7.70 – 7.66 (m, 1H), 7.49 – 7.44 (m, 2H), 7.38 (t,  $J = 2.0$  Hz, 1H), 7.31 – 7.27 (m, 3H), 7.26 – 7.20 (m, 4H), 7.18 – 7.12 (m, 3H), 7.08 – 7.04 (m, 1H), 7.00 (t,  $J = 7.5$  Hz, 1H), 6.95 – 6.90 (m, 1H), 6.89 – 6.84 (m, 1H), 6.33 (s, 1H), 4.04 (d,  $J = 16.0$  Hz, 1H), 3.99 (d,  $J = 16.0$  Hz, 1H).  $^{13}\text{C}$  NMR (125 MHz,  $\text{CDCl}_3$ )  $\delta$  184.6, 153.5, 150.3, 139.4, 139.3, 138.6, 135.7, 135.4, 133.4, 131.85, 131.78, 130.3, 129.5, 129.4, 128.8, 128.7, 128.6, 127.68, 127.66, 126.5, 122.7, 52.9, 41.4. HRMS (ESI)  $m/z$ :  $[\text{M}+\text{H}]^+$  Calcd for  $\text{C}_{27}\text{H}_{22}\text{OBrS}^+$  473.0569; Found 473.0576.

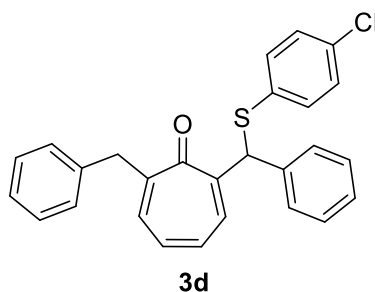

2-Benzyl-7-(((4-chlorophenyl)thio)(phenyl)methyl)cyclohepta-2,4,6-trien-1-one (**3d**). Yellow oil (72.9 mg, 85% yield).  $^1\text{H}$  NMR (500 MHz,  $\text{CDCl}_3$ )  $\delta$  7.68 (d,  $J = 8.5$  Hz, 1H), 7.49 – 7.43 (m, 2H), 7.31 – 7.25 (m, 4H), 7.24 – 7.20 (m, 2H), 7.18 – 7.13 (m, 4H), 7.13 – 7.09 (m, 2H), 7.06 (d,  $J = 8.5$  Hz, 1H), 6.91 (t,  $J = 9.0$  Hz, 1H), 6.85 (t,  $J = 9.0$  Hz, 1H), 6.29 (s, 1H), 4.03 (d,  $J = 16.0$  Hz, 1H), 3.97 (d,  $J = 16.0$  Hz, 1H).  $^{13}\text{C}$  NMR (125 MHz,  $\text{CDCl}_3$ )  $\delta$  184.6, 153.4, 150.5, 139.6, 139.2, 135.7, 135.3, 134.6, 133.3, 132.6, 131.8, 131.1, 129.5, 129.1, 128.74, 128.67, 128.6, 127.6, 126.5, 53.3, 41.4. HRMS (ESI)  $m/z$ :  $[\text{M}+\text{H}]^+$  Calcd for  $\text{C}_{27}\text{H}_{22}\text{OClS}^+$  429.1074; Found 429.1081.

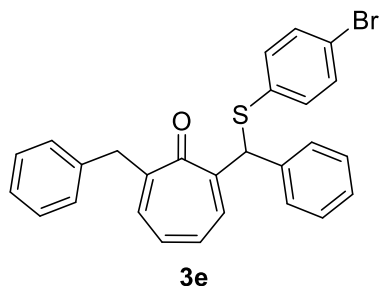

2-Benzyl-7-((4-bromophenyl)thio)(phenyl)methylcyclohepta-2,4,6-trien-1-one (**3e**). Yellow oil (75.9 mg, 80% yield).  $^1\text{H}$  NMR (500 MHz,  $\text{CDCl}_3$ )  $\delta$  7.70 – 7.65 (m, 1H), 7.48 – 7.43 (m, 2H), 7.30 – 7.24 (m, 5H), 7.24 – 7.18 (m, 3H), 7.16 – 7.13 (m, 2H), 7.10 – 7.03 (m, 3H), 6.92 – 6.86 (m, 1H), 6.85 – 6.80 (m, 1H), 6.30 (s, 1H), 4.03 (d,  $J = 16.0$  Hz, 1H), 3.97 (d,  $J = 16.0$  Hz, 1H).  $^{13}\text{C}$  NMR (125 MHz,  $\text{CDCl}_3$ )  $\delta$  184.5, 153.4, 150.4, 139.5, 139.2, 135.6, 135.3, 133.3, 131.9, 131.8, 131.1, 129.4, 128.7, 128.6, 128.5, 127.6, 126.5, 120.4, 53.0, 41.4. HRMS (ESI)  $m/z$ :  $[\text{M}+\text{H}]^+$  Calcd for  $\text{C}_{27}\text{H}_{22}\text{OBrS}^+$  473.0569; Found 473.0575.

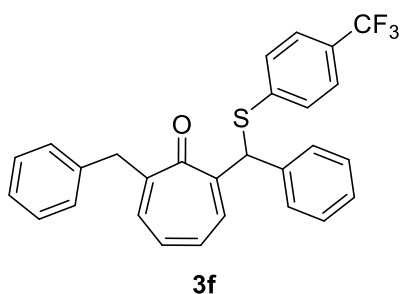

2-Benzyl-7-(phenyl((4-(trifluoromethyl)phenyl)thio)methyl)cyclohepta-2,4,6-trien-1-one (**3f**). Yellow oil (87.3 mg, 94% yield).  $^1\text{H}$  NMR (500 MHz,  $\text{CDCl}_3$ )  $\delta$  7.71 (dd,  $J = 8.0, 1.5$  Hz, 1H), 7.50 – 7.45 (m, 2H), 7.38 – 7.34 (m, 2H), 7.33 – 7.24 (m, 5H), 7.24 – 7.20 (m, 3H), 7.19 – 7.14 (m, 2H), 7.10 (dd,  $J = 8.0, 1.5$  Hz, 1H), 6.94 – 6.89 (m, 1H), 6.89 – 6.84 (m, 1H), 6.43 (s, 1H), 4.08 (d,  $J = 16.0$  Hz, 1H), 3.98 (d,  $J = 16.0$  Hz, 1H).  $^{13}\text{C}$  NMR (125 MHz,  $\text{CDCl}_3$ )  $\delta$  184.5, 153.5, 150.1, 141.8, 139.1, 139.0, 135.7, 135.4, 133.5, 131.9, 129.5, 128.9, 128.7, 128.5, 127.8, 127.7 (q,  $J_{\text{C-F}} = 32.4$  Hz), 127.6, 126.6, 125.7 (q,  $J_{\text{C-F}} = 3.8$  Hz), 124.2 (q,  $J_{\text{C-F}} = 270.1$  Hz), 51.8, 41.5.  $^{19}\text{F}$  NMR (471 MHz,  $\text{CDCl}_3$ )  $\delta$  -62.35. HRMS (ESI)  $m/z$ :  $[\text{M}+\text{H}]^+$  Calcd for  $\text{C}_{28}\text{H}_{22}\text{OF}_3\text{S}^+$  463.1338; Found 463.1343.

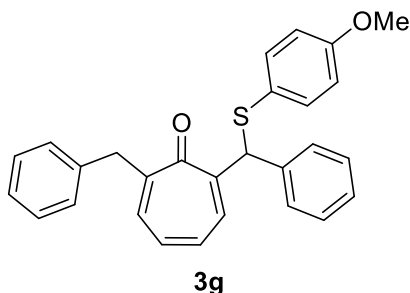

2-Benzyl-7-(((4-methoxyphenyl)thio)(phenyl)methyl)cyclohepta-2,4,6-trien-1-one (**3g**). Yellow oil (38.7 mg, 46% yield).  $^1\text{H}$  NMR (500 MHz,  $\text{CDCl}_3$ )  $\delta$  7.70 (d,  $J = 9.0$  Hz, 1H), 7.46 (d,  $J = 7.5$  Hz, 2H), 7.29 – 7.24 (m, 6H), 7.20 (t,  $J = 7.0$  Hz, 2H), 7.13 (d,  $J = 7.5$  Hz, 2H), 7.01 (d,  $J = 9.0$  Hz, 1H), 6.94 (t,  $J = 9.5$  Hz, 1H), 6.84 (t,  $J = 9.5$  Hz, 1H), 6.73 – 6.70 (m, 2H), 6.15 (s, 1H), 3.99 (d,  $J = 16.5$  Hz, 1H), 3.95 (d,  $J = 16.5$  Hz, 1H), 3.73 (s, 3H).  $^{13}\text{C}$  NMR (125 MHz,  $\text{CDCl}_3$ )  $\delta$  184.8, 159.3, 153.3, 151.3, 140.4, 139.4, 135.7, 135.1, 133.8, 133.0, 131.9, 129.6, 128.67, 128.66, 128.6, 127.3, 126.5, 126.1, 114.6, 55.4, 55.1, 41.3. HRMS (ESI)  $m/z$ :  $[\text{M}+\text{H}]^+$  Calcd for  $\text{C}_{28}\text{H}_{25}\text{O}_2\text{S}^+$  425.1570; Found 425.1576.

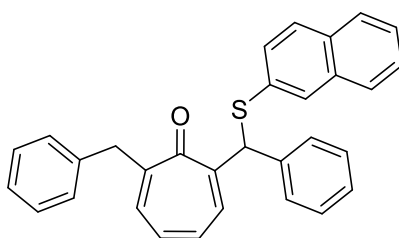

**3h**

2-Benzyl-7-((naphthalen-2-ylthio)(phenyl)methyl)cyclohepta-2,4,6-trien-1-one (**3h**). Yellow oil (35.6 mg, 40% yield).  $^1\text{H}$  NMR (500 MHz,  $\text{CDCl}_3$ )  $\delta$  7.82 – 7.77 (m, 1H), 7.74 – 7.70 (m, 1H), 7.66 – 7.61 (m, 2H), 7.60 – 7.56 (m, 1H), 7.54 – 7.49 (m, 2H), 7.42 – 7.36 (m, 3H), 7.28 (t,  $J = 7.5$  Hz, 2H), 7.25 – 7.18 (m, 4H), 7.15 – 7.09 (m, 2H), 7.05 – 7.00 (m, 1H), 6.92 (t,  $J = 9.5$  Hz, 1H), 6.83 (t,  $J = 9.5$  Hz, 1H), 6.48 (s, 1H), 4.01 (d,  $J = 16.0$  Hz, 1H), 3.96 (d,  $J = 16.0$  Hz, 1H).  $^{13}\text{C}$  NMR (125 MHz,  $\text{CDCl}_3$ )  $\delta$  184.8, 153.4, 150.8, 139.9, 139.4, 135.7, 135.3, 133.8, 133.6, 133.2, 132.0, 131.9, 129.6, 128.75, 128.68, 128.5, 127.9, 127.7, 127.6, 127.5, 127.4, 126.51, 126.49, 125.9, 53.0, 41.4. HRMS (ESI)  $m/z$ :  $[\text{M}+\text{H}]^+$  Calcd for  $\text{C}_{31}\text{H}_{24}\text{ONaS}^+$  467.1440; Found 467.1447.

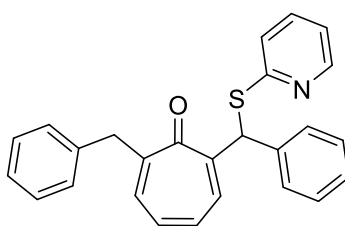

**3i**

2-Benzyl-7-(phenyl(pyridin-2-ylthio)methyl)cyclohepta-2,4,6-trien-1-one (**3i**). Yellow oil (20.7 mg, 26% yield).  $^1\text{H}$  NMR (500 MHz,  $\text{CDCl}_3$ )  $\delta$  8.30 – 8.26 (m, 1H), 7.83 – 7.78 (m, 1H), 7.53 – 7.49 (m, 2H), 7.42 – 7.37 (m, 1H), 7.30 – 7.25 (m, 4H), 7.24 – 7.16 (m, 4H), 7.11 – 7.03 (m, 2H), 6.95 – 6.90 (m, 2H), 6.89 – 6.83 (m, 1H), 6.74 (s, 1H), 4.10 (d,  $J = 16.0$  Hz, 1H), 3.98 (d,  $J = 16.0$  Hz, 1H).  $^{13}\text{C}$  NMR (125 MHz,  $\text{CDCl}_3$ )  $\delta$  184.9, 158.7, 153.3, 151.4, 149.4, 139.7, 139.5, 136.3, 135.2, 135.1, 133.1, 131.9, 129.6, 128.7, 128.6, 128.5, 127.3, 126.5, 121.6, 119.8, 50.7, 41.2. HRMS (ESI)  $m/z$ :  $[\text{M}+\text{H}]^+$  Calcd for  $\text{C}_{26}\text{H}_{22}\text{ONS}^+$  396.1417; Found 396.1421.

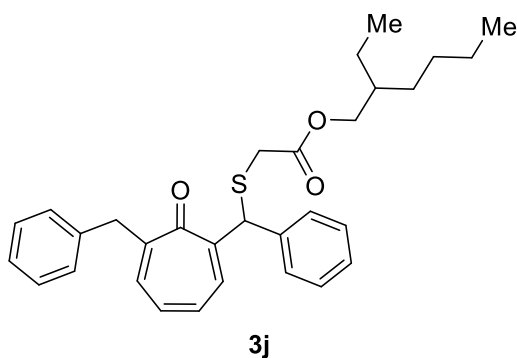

2-Ethylhexyl 2-(((6-benzyl-7-oxocyclohepta-1,3,5-trien-1-yl)(phenyl)methyl)thio)acetate (**3j**). Yellow oil (47.9 mg, 49% yield).  $^1\text{H}$  NMR (500 MHz,  $\text{CDCl}_3$ )  $\delta$  7.72 – 7.66 (m, 1H), 7.49 – 7.44 (m, 2H), 7.32 – 7.15 (m, 8H), 7.03 (dd,  $J = 8.5, 1.0$  Hz, 1H), 6.99 – 6.94 (m, 1H), 6.90 – 6.85 (m, 1H), 5.96 (s, 1H), 4.00 (s, 2H), 3.98 – 3.89 (m, 2H), 3.24 (d,  $J = 14.5$  Hz, 1H), 3.18 (d,  $J = 14.5$  Hz, 1H), 1.58 – 1.50 (m, 1H), 1.36 – 1.28 (m, 4H), 1.27 – 1.24 (m, 4H), 0.91 – 0.84 (m, 6H).  $^{13}\text{C}$  NMR (125 MHz,  $\text{CDCl}_3$ )  $\delta$  184.6, 170.1, 153.6, 150.7, 139.8, 139.3, 135.3, 135.0, 133.1, 131.8, 129.6, 128.7, 128.64, 128.62, 127.5, 126.5, 68.0, 51.2, 41.2, 38.68, 38.67, 35.0, 30.3, 28.98, 28.96, 23.7, 23.1, 14.2, 11.1, 11.0. HRMS (ESI)  $m/z$ :  $[\text{M}+\text{H}]^+$  Calcd for  $\text{C}_{31}\text{H}_{37}\text{O}_3\text{S}^+$  489.2458; Found 489.2461.

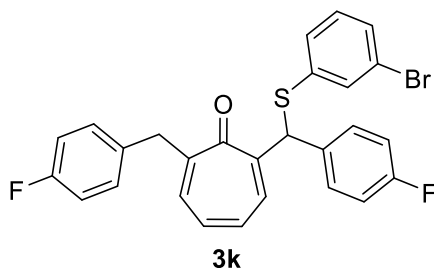

2-(((3-Bromophenyl)thio)(4-fluorophenyl)methyl)-7-(4-fluorobenzyl)cyclohepta-2,4,6-trien-1-one (**3k**). Yellow oil (73.2 mg, 72% yield).  $^1\text{H}$  NMR (500 MHz,  $\text{CDCl}_3$ )  $\delta$  7.71 – 7.65 (m, 1H), 7.42 – 7.35 (m, 3H), 7.25 – 7.21 (m, 1H), 7.13 – 7.07 (m, 4H), 7.00 (t,  $J = 8.0$  Hz, 1H), 6.98 – 6.92 (m, 5H), 6.91 – 6.87 (m, 1H), 6.25 (s, 1H), 3.96 (s, 2H).  $^{13}\text{C}$  NMR (125 MHz,  $\text{CDCl}_3$ )  $\delta$  184.4, 162.9 (d,  $J_{\text{C-F}} = 62.6$  Hz), 160.9 (d,  $J_{\text{C-F}} = 60.3$  Hz), 153.1, 150.1, 138.2, 135.5, 135.3, 135.0 (d,  $J_{\text{C-F}} = 3.3$  Hz), 134.7 (d,  $J_{\text{C-F}} = 3.3$  Hz), 133.4, 131.9 (d,  $J_{\text{C-F}} = 5.0$  Hz), 130.8 (d,  $J_{\text{C-F}} = 7.8$  Hz), 130.3, 130.2 (d,  $J_{\text{C-F}} = 8.0$  Hz), 129.6, 127.8, 122.7, 115.7, 115.5 (d,  $J_{\text{C-F}} = 5.5$  Hz), 115.3, 52.4, 40.7.  $^{19}\text{F}$  NMR (471 MHz,  $\text{CDCl}_3$ )  $\delta$  -114.43, -116.51. HRMS (ESI)  $m/z$ :  $[\text{M}+\text{H}]^+$  Calcd for  $\text{C}_{27}\text{H}_{20}\text{OBrF}_2\text{S}^+$  509.0381; Found 509.0388.

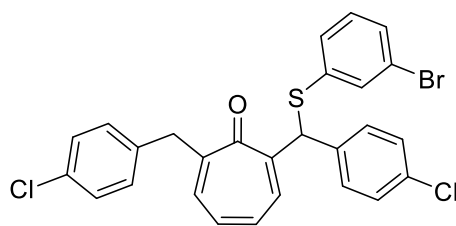

**3l**

2-(((3-Bromophenyl)thio)(4-chlorophenyl)methyl)-7-(4-chlorobenzyl)cyclohepta-2,4,6-trien-1-one (**3l**). Yellow oil (61.0 mg, 56% yield).  $^1\text{H}$  NMR (500 MHz,  $\text{CDCl}_3$ )  $\delta$  7.66 – 7.63 (m, 1H), 7.38 – 7.33 (m, 3H), 7.27 – 7.20 (m, 5H), 7.14 – 7.06 (m, 4H), 7.02 (t,  $J = 8.0$  Hz, 1H), 6.99 – 6.94 (m, 1H), 6.94 – 6.89 (m, 1H), 6.21 (s, 1H), 3.95 (s, 2H).  $^{13}\text{C}$  NMR (125 MHz,  $\text{CDCl}_3$ )  $\delta$  184.3, 152.9, 150.0, 138.0, 137.9, 137.6, 135.6, 135.5, 133.6, 133.5, 132.4, 132.1, 132.0, 130.7, 130.4, 129.9, 129.8, 128.9, 128.7, 127.9, 122.8, 52.6, 41.0. HRMS (ESI)  $m/z$ :  $[\text{M}+\text{H}]^+$  Calcd for  $\text{C}_{27}\text{H}_{20}\text{OBrCl}_2\text{S}^+$  540.9790; Found 540.9795.

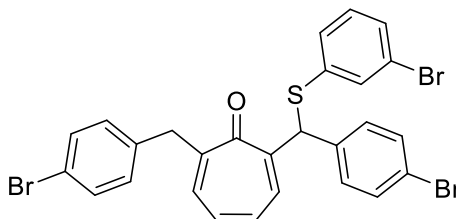

**3m**

2-(4-Bromobenzyl)-7-((4-bromophenyl)((3-bromophenyl)thio)methyl)cyclohepta-2,4,6-trien-1-one (**3m**). Yellow oil (101.5 mg, 80% yield).  $^1\text{H}$  NMR (500 MHz,  $\text{CDCl}_3$ )  $\delta$  7.66 – 7.62 (m, 1H), 7.42 – 7.33 (m, 5H), 7.32 – 7.28 (m, 2H), 7.26 – 7.23 (m, 1H), 7.13 – 7.09 (m, 2H), 7.04 – 6.99 (m, 3H), 6.98 – 6.93 (m, 1H), 6.93 – 6.88 (m, 1H), 6.19 (s, 1H), 3.95 (d,  $J = 16.5$  Hz, 1H), 3.91 (d,  $J = 16.5$  Hz, 1H).  $^{13}\text{C}$  NMR (125 MHz,  $\text{CDCl}_3$ )  $\delta$  184.2, 152.7, 150.0, 138.4, 138.1, 137.9, 135.6, 135.5, 133.5, 132.1, 132.0, 131.8, 131.7, 131.0, 130.4, 130.2, 129.8, 127.9, 122.8, 121.7, 120.4, 52.6, 41.1. HRMS (ESI)  $m/z$ :  $[\text{M}+\text{H}]^+$  Calcd for  $\text{C}_{27}\text{H}_{20}\text{OBr}_3\text{S}^+$  628.8780; Found 628.8778.

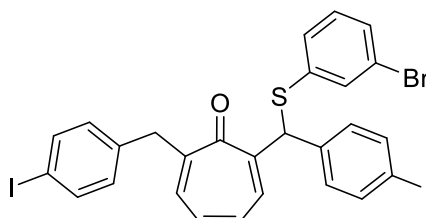

**3n**

2-(((3-Bromophenyl)thio)(4-iodophenyl)methyl)-7-(4-iodobenzyl)cyclohepta-2,4,6-trien-1-one (**3n**). Yellow oil (94.8 mg, 65% yield).  $^1\text{H}$  NMR (500 MHz,  $\text{CDCl}_3$ )  $\delta$  7.66 – 7.52 (m, 5H), 7.35 (t,  $J = 2.0$  Hz, 1H), 7.27 – 7.24 (m, 1H), 7.20 – 7.15 (m, 2H), 7.13 – 7.09 (m, 2H), 7.02 (t,  $J = 7.5$  Hz, 1H),

6.99 – 6.94 (m, 1H), 6.94 – 6.88 (m, 3H), 6.18 (s, 1H), 3.94 (d,  $J = 16.5$  Hz, 1H), 3.91 (d,  $J = 16.5$  Hz, 1H).  $^{13}\text{C}$  NMR (125 MHz,  $\text{CDCl}_3$ )  $\delta$  184.2, 152.7, 149.9, 139.1, 138.8, 137.9, 137.8, 137.7, 135.7, 135.6, 133.5, 132.1, 131.9, 131.4, 130.5, 130.4, 129.7, 127.8, 122.8, 93.5, 91.9, 52.7, 41.2. HRMS (ESI)  $m/z$ :  $[\text{M}+\text{H}]^+$  Calcd for  $\text{C}_{27}\text{H}_{20}\text{OBrI}_2\text{S}^+$  724.8502; Found 724.8500.

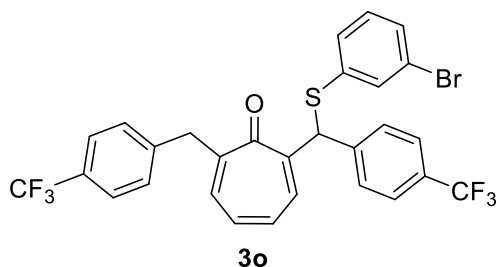

2-(((3-Bromophenyl)thio)(4-(trifluoromethyl)phenyl)methyl)-7-(4-(trifluoromethyl)benzyl)cyclohepta-2,4,6-trien-1-one (**3o**). Yellow oil (92.2 mg, 76% yield).  $^1\text{H}$  NMR (500 MHz,  $\text{CDCl}_3$ )  $\delta$  7.73 – 7.68 (m, 1H), 7.58 – 7.52 (m, 4H), 7.52 – 7.48 (m, 2H), 7.38 (t,  $J = 2.0$  Hz, 1H), 7.30 – 7.24 (m, 3H), 7.21 – 7.17 (m, 1H), 7.15 – 7.11 (m, 1H), 7.05 – 6.94 (m, 3H), 6.27 (s, 1H), 4.07 (d,  $J = 16.5$  Hz, 1H), 4.03 (d,  $J = 16.5$  Hz, 1H).  $^{13}\text{C}$  NMR (125 MHz,  $\text{CDCl}_3$ )  $\delta$  184.1, 152.4, 149.9, 143.5, 143.3, 137.6, 136.00, 135.95, 133.7, 132.3, 132.2, 130.5, 130.0, 129.8 (q,  $J_{\text{C-F}} = 32.3$  Hz), 129.5, 128.9, 128.8 (q,  $J_{\text{C-F}} = 32.1$  Hz), 128.1, 125.7 (q,  $J_{\text{C-F}} = 3.8$  Hz), 125.5 (q,  $J_{\text{C-F}} = 3.8$  Hz), 124.3 (q,  $J_{\text{C-F}} = 270.4$  Hz), 124.1 (q,  $J_{\text{C-F}} = 270.4$  Hz), 122.8, 53.1, 41.6.  $^{19}\text{F}$  NMR (471 MHz,  $\text{CDCl}_3$ )  $\delta$  -62.33, -62.49. HRMS (ESI)  $m/z$ :  $[\text{M}+\text{H}]^+$  Calcd for  $\text{C}_{29}\text{H}_{20}\text{OBrF}_6\text{S}^+$  609.0317; Found 609.0320.

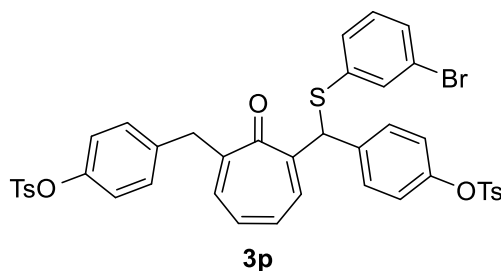

4-(((6-(((3-Bromophenyl)thio)(4-(tosyloxy)phenyl)methyl)-7-oxocyclohepta-1,3,5-trien-1-yl)methyl)phenyl 4-methylbenzenesulfonate (**3p**). Yellow oil (84.0 mg, 52% yield).  $^1\text{H}$  NMR (500 MHz,  $\text{CDCl}_3$ )  $\delta$  7.73 – 7.66 (m, 4H), 7.63 – 7.60 (m, 1H), 7.38 – 7.34 (m, 2H), 7.32 – 7.24 (m, 6H), 7.12 – 7.06 (m, 4H), 7.02 (t,  $J = 8.0$  Hz, 1H), 6.99 – 6.95 (m, 1H), 6.95 – 6.92 (m, 1H), 6.92 – 6.87 (m, 4H), 6.19 (s, 1H), 3.98 (d,  $J = 15.5$  Hz, 1H), 3.90 (d,  $J = 15.5$  Hz, 1H), 2.44 (s, 3H), 2.43 (s, 3H).  $^{13}\text{C}$  NMR (125 MHz,  $\text{CDCl}_3$ )  $\delta$  184.2, 152.7, 150.1, 148.9, 148.2, 145.6, 145.4, 138.4, 138.2, 137.9, 135.9, 135.8, 133.6, 132.5, 132.4, 132.2, 132.1, 130.5, 130.4, 129.89, 129.86, 129.80, 129.78, 128.54, 128.52, 128.1, 122.7, 122.6, 122.5, 52.4, 40.9, 21.85, 21.83. HRMS (ESI)  $m/z$ :  $[\text{M}+\text{H}]^+$  Calcd for  $\text{C}_{41}\text{H}_{34}\text{O}_7\text{BrS}_3^+$  813.0645; Found 813.0639.

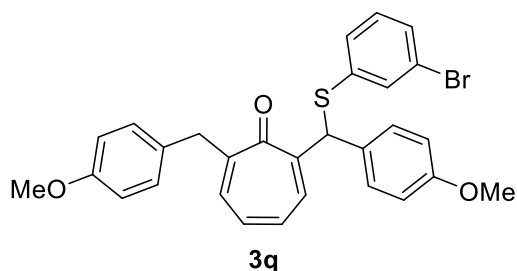

2-(((3-Bromophenyl)thio)(4-methoxyphenyl)methyl)-7-(4-methoxybenzyl)cyclohepta-2,4,6-trien-1-one (**3q**). Yellow oil (59.3 mg, 56% yield).  $^1\text{H}$  NMR (500 MHz,  $\text{CDCl}_3$ )  $\delta$  7.72 – 7.68 (m, 1H), 7.39 – 7.34 (m, 3H), 7.24 – 7.20 (m, 1H), 7.14 – 7.10 (m, 1H), 7.09 – 7.03 (m, 3H), 7.00 (t,  $J = 8.0$  Hz, 1H), 6.95 – 6.90 (m, 1H), 6.89 – 6.84 (m, 1H), 6.83 – 6.78 (m, 4H), 6.28 (s, 1H), 3.94 (s, 2H), 3.77 (s, 3H), 3.76 (s, 3H).  $^{13}\text{C}$  NMR (125 MHz,  $\text{CDCl}_3$ )  $\delta$  184.7, 159.0, 158.3, 153.8, 150.3, 138.8, 135.4, 135.1, 133.3, 131.7, 131.6, 131.20, 131.17, 130.5, 130.3, 129.7, 129.3, 127.5, 122.7, 114.12, 114.06, 55.3, 52.2, 40.5. HRMS (ESI)  $m/z$ :  $[\text{M}+\text{H}]^+$  Calcd for  $\text{C}_{29}\text{H}_{26}\text{O}_3\text{BrS}^+$  533.0781; Found 533.0776.

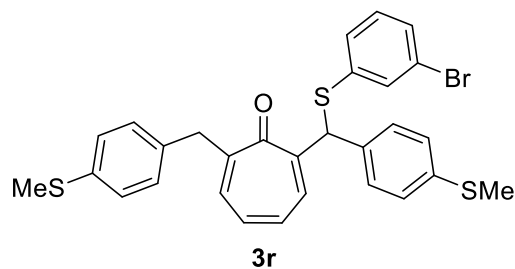

2-(((3-Bromophenyl)thio)(4-(methylthio)phenyl)methyl)-7-(4-(methylthio)benzyl)cyclohepta-2,4,6-trien-1-one (**3r**). Red oil (63.1 mg, 56% yield).  $^1\text{H}$  NMR (500 MHz,  $\text{CDCl}_3$ )  $\delta$  7.69 – 7.66 (m, 1H), 7.38 – 7.34 (m, 3H), 7.25 – 7.21 (m, 1H), 7.18 – 7.14 (m, 4H), 7.13 – 7.06 (m, 4H), 7.01 (t,  $J = 8.0$  Hz, 1H), 6.97 – 6.92 (m, 1H), 6.91 – 6.86 (m, 1H), 6.26 (s, 1H), 3.96 (s, 2H), 2.46 (s, 3H), 2.44 (s, 3H).  $^{13}\text{C}$  NMR (125 MHz,  $\text{CDCl}_3$ )  $\delta$  184.4, 153.3, 150.1, 138.4, 138.0, 136.3, 136.0, 135.9, 135.5, 135.3, 133.4, 131.9, 131.7, 130.3, 129.9, 129.4, 129.0, 127.6, 127.0, 126.5, 122.7, 52.5, 40.9, 16.1, 15.7. HRMS (ESI)  $m/z$ :  $[\text{M}+\text{H}]^+$  Calcd for  $\text{C}_{29}\text{H}_{26}\text{OBrS}_3^+$  565.0324; Found 565.0325.

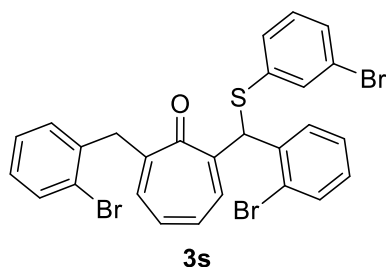

2-(2-Bromobenzyl)-7-((2-bromophenyl)((3-bromophenyl)thio)methyl)cyclohepta-2,4,6-trien-1-one (**3s**). Yellow oil (102 mg, 81% yield).  $^1\text{H}$  NMR (500 MHz,  $\text{CDCl}_3$ )  $\delta$  7.77 (dd,  $J = 7.5, 2.0$  Hz, 1H), 7.59 – 7.53 (m, 2H), 7.46 (t,  $J = 2.0$  Hz, 1H), 7.40 (dd,  $J = 7.5, 2.0$  Hz, 1H), 7.31 (t,  $J = 7.5$  Hz,

1H), 7.28 – 7.22 (m, 4H), 7.17 – 7.05 (m, 3H), 6.95 – 6.86 (m, 3H), 6.51 (s, 1H), 4.23 (d,  $J = 17.0$  Hz, 1H), 4.14 (d,  $J = 17.0$  Hz, 1H).  $^{13}\text{C}$  NMR (125 MHz,  $\text{CDCl}_3$ )  $\delta$  184.1, 151.5, 148.6, 138.70, 138.69, 138.6, 135.9, 134.7, 133.6, 133.5, 133.1, 132.1, 131.70, 131.66, 130.5, 130.1, 129.7, 129.4, 128.5, 127.71, 127.65, 127.6, 125.6, 125.5, 122.8, 54.0, 41.2. HRMS (ESI)  $m/z$ :  $[\text{M}+\text{H}]^+$  Calcd for  $\text{C}_{27}\text{H}_{20}\text{OBr}_3\text{S}^+$  628.8780; Found 628.8788.

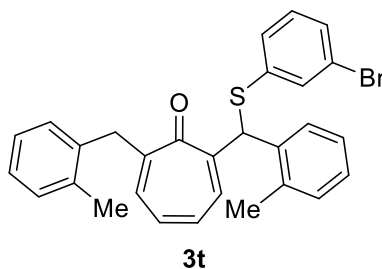

2-(((3-Bromophenyl)thio)(o-tolyl)methyl)-7-(2-methylbenzyl)cyclohepta-2,4,6-trien-1-one (**3t**). Yellow oil (62.0 mg, 62% yield).  $^1\text{H}$  NMR (500 MHz,  $\text{CDCl}_3$ )  $\delta$  7.70 – 7.66 (m, 1H), 7.52 – 7.48 (m, 1H), 7.39 (t,  $J = 2.0$  Hz, 1H), 7.24 – 7.21 (m, 1H), 7.19 – 7.12 (m, 7H), 7.07 – 7.01 (m, 2H), 6.94 – 6.88 (m, 1H), 6.85 – 6.77 (m, 2H), 6.45 (s, 1H), 4.02 (d,  $J = 17.5$  Hz, 1H), 3.98 (d,  $J = 17.5$  Hz, 1H), 2.40 (s, 3H), 2.10 (s, 3H).  $^{13}\text{C}$  NMR (125 MHz,  $\text{CDCl}_3$ )  $\delta$  184.6, 152.5, 149.0, 139.1, 137.3, 137.2, 137.11, 137.05, 135.8, 134.3, 133.3, 131.5, 131.2, 130.9, 130.6, 130.5, 130.3, 129.3, 127.77, 127.75, 127.1, 127.0, 126.3, 126.2, 122.7, 50.4, 38.5, 19.6, 19.5. HRMS (ESI)  $m/z$ :  $[\text{M}+\text{H}]^+$  Calcd for  $\text{C}_{29}\text{H}_{26}\text{OBrS}^+$  501.0882; Found 501.0891.

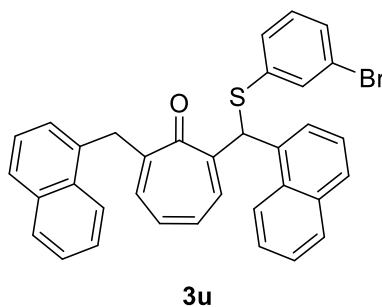

2-(((3-Bromophenyl)thio)(naphthalen-1-yl)methyl)-7-(naphthalen-1-ylmethyl)cyclohepta-2,4,6-trien-1-one (**3u**). Yellow oil (58.0 mg, 51% yield).  $^1\text{H}$  NMR (500 MHz,  $\text{CDCl}_3$ )  $\delta$  8.09 (d,  $J = 7.0$  Hz, 1H), 8.07 – 8.04 (m, 1H), 7.89 – 7.85 (m, 2H), 7.81 (t,  $J = 8.5$  Hz, 2H), 7.76 – 7.73 (m, 1H), 7.53 – 7.48 (m, 4H), 7.48 – 7.44 (m, 2H), 7.42 – 7.35 (m, 3H), 7.29 – 7.24 (m, 2H), 7.24 – 7.23 (m, 1H), 7.03 (t,  $J = 7.5$  Hz, 1H), 6.84 – 6.80 (m, 1H), 6.77 – 6.72 (m, 1H), 6.70 – 6.65 (m, 1H), 4.62 (d,  $J = 18.5$  Hz, 1H), 4.52 (d,  $J = 18.5$  Hz, 1H).  $^{13}\text{C}$  NMR (125 MHz,  $\text{CDCl}_3$ )  $\delta$  184.1, 153.1, 150.0, 139.1, 136.0, 135.4, 135.3, 135.2, 134.2, 134.1, 133.6, 132.3, 131.9, 131.7, 131.5, 130.4, 129.5, 129.0, 128.83, 128.78, 128.4, 127.8, 127.6, 127.0, 126.6, 126.4, 126.1, 125.9, 125.8, 125.5, 124.5, 123.6, 122.7, 50.1, 38.1. HRMS (APCI)  $m/z$ :  $[\text{M}+\text{H}]^+$  Calcd for  $\text{C}_{35}\text{H}_{26}\text{OBrS}^+$  573.0882; Found 573.0873.



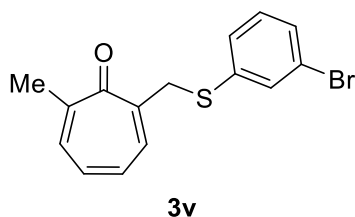

2-(((3-Bromophenyl)thio)methyl)-7-methylcyclohepta-2,4,6-trien-1-one (**3v**). Yellow oil (40.4 mg, 63% yield).  $^1\text{H NMR}$  (500 MHz,  $\text{CDCl}_3$ )  $\delta$  7.46 (t,  $J = 1.5$  Hz, 1H), 7.38 (d,  $J = 8.5$  Hz, 1H), 7.31 (d,  $J = 8.5$  Hz, 1H), 7.28 – 7.22 (m, 2H), 7.11 (t,  $J = 8.0$  Hz, 1H), 6.96 – 6.90 (m, 1H), 6.89 – 6.83 (m, 1H), 4.14 (s, 2H), 2.35 (s, 3H).  $^{13}\text{C NMR}$  (125 MHz,  $\text{CDCl}_3$ )  $\delta$  185.2, 151.0, 146.6, 138.7, 135.2, 135.1, 133.5, 133.0, 131.5, 130.3, 129.7, 129.0, 122.7, 39.5, 23.7. HRMS (ESI)  $m/z$ :  $[\text{M}+\text{H}]^+$  Calcd for  $\text{C}_{15}\text{H}_{14}\text{OBrS}^+$  320.9943; Found 320.9951.

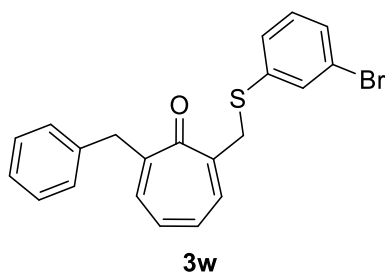

2-Benzyl-7-(((3-bromophenyl)thio)methyl)cyclohepta-2,4,6-trien-1-one (**3w**). Yellow oil (44.3 mg, 54% yield).  $^1\text{H NMR}$  (500 MHz,  $\text{CDCl}_3$ )  $\delta$  7.43 (t,  $J = 1.5$  Hz, 1H), 7.33 – 7.27 (m, 3H), 7.26 – 7.16 (m, 5H), 7.15 – 7.12 (m, 1H), 7.07 (t,  $J = 7.5$  Hz, 1H), 6.91 – 6.85 (m, 1H), 6.84 – 6.78 (m, 1H), 4.13 (s, 2H), 4.04 (s, 2H).  $^{13}\text{C NMR}$  (125 MHz,  $\text{CDCl}_3$ )  $\delta$  184.7, 153.1, 147.4, 139.3, 138.6, 135.5, 135.1, 133.3, 133.0, 131.8, 130.3, 129.7, 129.6, 129.0, 128.7, 126.5, 122.7, 41.4, 39.4. HRMS (ESI)  $m/z$ :  $[\text{M}+\text{Na}]^+$  Calcd for  $\text{C}_{21}\text{H}_{17}\text{OBrNaS}^+$  419.0076; Found 419.0079.

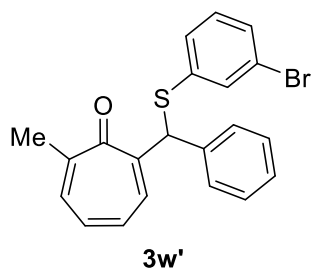

2-(((3-Bromophenyl)thio)(phenyl)methyl)-7-methylcyclohepta-2,4,6-trien-1-one (**3w'**). Yellow oil (20.9 mg, 26% yield).  $^1\text{H NMR}$  (500 MHz,  $\text{CDCl}_3$ )  $\delta$  7.70 (dd,  $J = 8.0, 1.5$  Hz, 1H), 7.49 (dd,  $J = 8.0, 1.5$  Hz, 2H), 7.40 (t,  $J = 1.5$  Hz, 1H), 7.35 (dt,  $J = 8.0, 1.5$  Hz, 1H), 7.33 – 7.29 (m, 2H), 7.27 – 7.22 (m, 2H), 7.18 (dt,  $J = 8.0, 1.5$  Hz, 1H), 7.04 (t,  $J = 7.5$  Hz, 1H), 7.00 – 6.90 (m, 2H), 6.33 (s, 1H), 2.32 (s, 3H).  $^{13}\text{C NMR}$  (125 MHz,  $\text{CDCl}_3$ )  $\delta$  184.8, 151.6, 149.7, 139.5, 138.6, 136.0, 135.1, 133.6,

131.9, 131.7, 130.3, 129.5, 128.8, 128.6, 127.8, 127.7, 122.7, 52.9, 24.0. HRMS (ESI)  $m/z$ :  $[M+Na]^+$   
Calcd for  $C_{21}H_{17}OBrNaS^+$  419.0076; Found 419.0079.

### Scale-up reaction and synthetic transformations (Scheme 4)

#### (1) Scale-up reaction

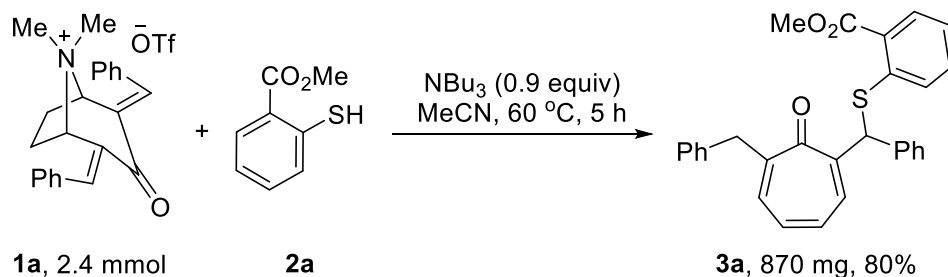

A mixture of 2,4-dibenzylidenetropinone-derived quaternary ammonium salt **1a** (1.15 mg, 2.4 mmol), methyl thiosalicylate (**2a**) (606 mg, 370  $\mu$ L, 3.6 mmol), and tributylamine (445 mg, 516  $\mu$ L, 2.16 mmol) in acetonitrile (1.2 mL) was heated in a sealed tube at 60 °C (oil bath) for 5 h, and cooled to room temperature. The mixture was concentrated under reduced pressure and purified by silica gel chromatography, using petroleum ether /ethyl acetate (5/1) as the eluent, to give tropone **3a** as a white solid (870 mg, 80% yield).

#### (2) Synthetic transformations

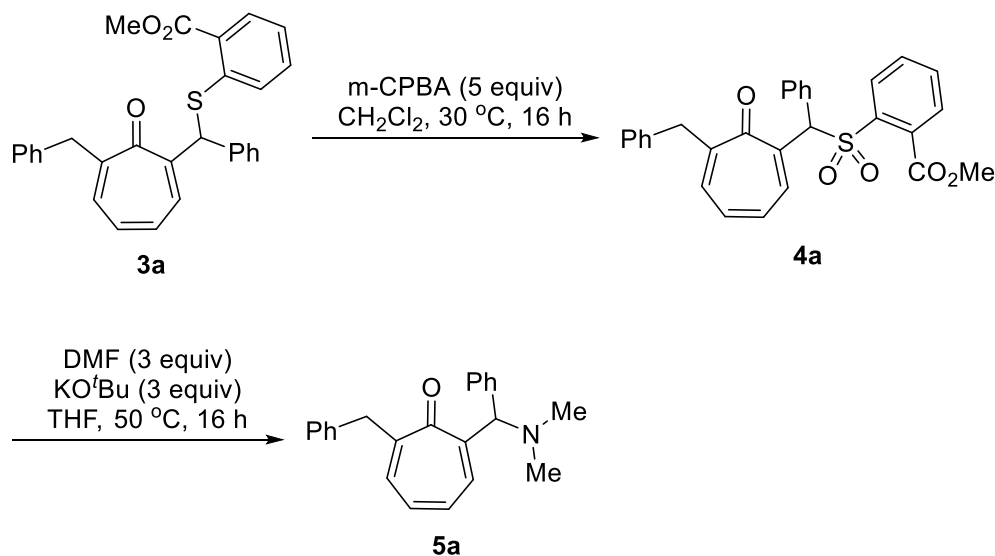

A suspension of  $m$ -chloroperoxybenzoic acid (86.1 mg, 0.50 mmol) and tropone **3a** (45.3 mg, 0.10 mmol) in dichloromethane (1.5 mL) was stirred at 30 °C for 16 h, and were added dichloromethane (5.0 mL) and saturated aqueous sodium bicarbonate (2.0 mL). The mixture was separated, and the aqueous layer was extracted twice with dichloromethane (5.0 mL). The organic layer was dried over anhydrous sodium sulfate, and concentrated under reduced pressure. The residue

was purified by silica gel chromatography, using petroleum ether and ethyl acetate (2:1) as the eluent, to give methyl 2-(((6-benzyl-7-oxocyclohepta-1,3,5-trien-1-yl)(phenyl)methyl)sulfonyl)benzoate (**4a**) as a yellow solid (42.2 mg, 87% yield). m.p. 124 – 127 °C. <sup>1</sup>H NMR (500 MHz, CDCl<sub>3</sub>) δ 8.47 – 8.45 (m, 1H), 7.66 (dd, *J* = 7.5, 1.5 Hz, 1H), 7.57 (td, *J* = 7.5, 1.5 Hz, 1H), 7.50 – 7.47 (m, 2H), 7.37 (dd, *J* = 7.5, 1.5 Hz, 1H), 7.32 – 7.29 (m, 1H), 7.27 – 7.26 (m, 1H), 7.26 – 7.25 (m, 2H), 7.25 – 7.23 (m, 1H), 7.22 – 7.18 (m, 2H), 7.14 – 7.11 (m, 2H), 7.11 – 7.04 (m, 2H), 7.00 – 6.96 (m, 1H), 3.95 (d, *J* = 16.0 Hz, 1H), 3.85 (d, *J* = 16.0 Hz, 1H), 3.83 (s, 3H). <sup>13</sup>C NMR (125 MHz, CDCl<sub>3</sub>) δ 184.2, 167.6, 153.8, 143.2, 139.0, 137.1, 136.8, 135.6, 134.4, 133.7, 133.6, 132.8, 131.9, 131.8, 130.6, 130.1, 129.8, 129.5, 128.9, 128.71, 128.66, 126.6, 68.6, 53.5, 41.6. HRMS (ESI) *m/z*: [M+Na]<sup>+</sup> Calcd for C<sub>29</sub>H<sub>24</sub>O<sub>5</sub>NaS<sup>+</sup> 507.1237; Found 507.1240.

A suspension of KO<sup>t</sup>Bu (33.7 mg, 0.30 mmol) and *N,N*-dimethylformamide (21.9 mg, 23.0 μL, 0.30 mmol) in tetrahydrofuran (1.0 mL) was stirred at room temperature for 15 min, and was added sulfone **4a** (48.4 mg, 0.10 mmol). The mixture was heated at 50 °C (oil bath) for 16 h, cooled to room temperature, and concentrated under reduced pressure. The residue was purified by silica gel chromatography, using petroleum ether and ethyl acetate (1:1) as the eluent, to give 2-(6-benzyl-7-oxocyclohepta-1,3,5-trien-1-yl)-*N,N*-dimethyl-2-phenylacetamide (**5a**) as a yellow oil (16.8 mg, 51% yield). <sup>1</sup>H NMR (500 MHz, CDCl<sub>3</sub>) δ 8.02 – 7.98 (m, 1H), 7.50 – 7.46 (m, 2H), 7.28 – 7.23 (m, 4H), 7.22 – 7.16 (m, 2H), 7.15 – 7.11 (m, 2H), 7.08 – 6.99 (m, 2H), 6.87 – 6.82 (m, 1H), 4.77 (s, 1H), 4.02 (d, *J* = 16.5 Hz, 1H), 3.93 (d, *J* = 16.5 Hz, 1H), 2.18 (s, 6H). <sup>13</sup>C NMR (125 MHz, CDCl<sub>3</sub>) δ 185.3, 153.4, 139.6, 134.9, 134.2, 132.6, 132.5, 129.6, 128.7, 128.6, 128.4, 127.2, 126.4, 71.7, 44.7, 41.2. HRMS (ESI) *m/z*: [M+H]<sup>+</sup> Calcd for C<sub>23</sub>H<sub>24</sub>ON<sup>+</sup> 333.1852; Found 333.1851.

## Mechanistic studies (Scheme 5)

### (a) Control experiments

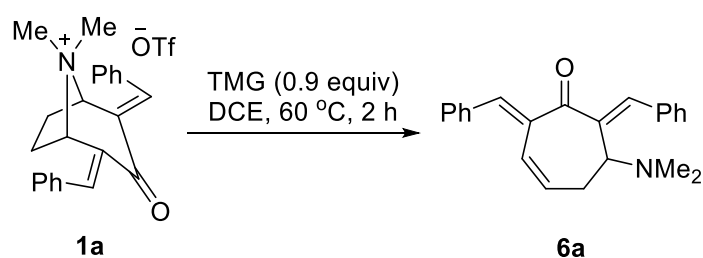

A mixture of 2,4-dibenzylidenetropinone-derived quaternary ammonium salt **1a** (192 mg, 0.40 mmol) and 1,1,3,3-tetramethylguanidine (41.5 mg, 45.4 μL, 0.36 mmol) in 1,2-dichloroethane (2.0 mL) was heated in a sealed tube at 60 °C (oil bath) for 2 h, and cooled to room temperature. The mixture was directly purified by silica gel chromatography, using petroleum ether/ethyl acetate (7/1) as the eluent, to give 2,7-di(*E*)-benzylidene)-6-(dimethylamino)cyclohept-3-en-1-one (**6a**) as a yellow oil (78.1 mg, 54% yield). <sup>1</sup>H NMR (500 MHz, CDCl<sub>3</sub>) δ 7.52 – 7.47 (m, 3H), 7.41 – 7.35 (m, 7H),

7.34 – 7.28 (m, 2H), 6.45 – 6.37 (m, 1H), 5.75 (dt,  $J = 12.5, 4.5$  Hz, 1H), 3.60 (t,  $J = 4.0$  Hz, 1H), 2.94 – 2.86 (m, 1H), 2.66 – 2.59 (m, 1H), 2.18 (s, 6H).  $^{13}\text{C}$  NMR (125 MHz,  $\text{CDCl}_3$ )  $\delta$  196.0, 145.8, 137.5, 136.5, 136.3, 135.8, 135.4, 130.6, 129.5, 128.6, 128.30, 128.26, 128.2, 126.8, 124.7, 61.2, 43.0, 33.5. HRMS (ESI)  $m/z$ :  $[\text{M}+\text{H}]^+$  Calcd for  $\text{C}_{23}\text{H}_{24}\text{ON}^+$  330.1852; Found 330.1859.

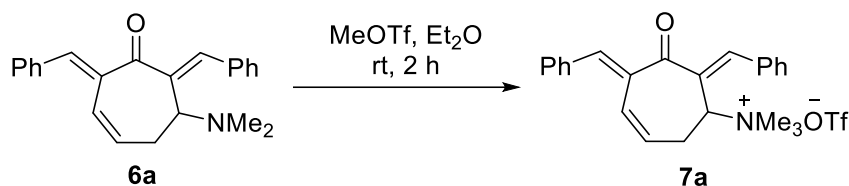

A mixture of aminated trienone **6a** (65.6 mg, 0.20 mmol) and methyl trifluoromethanesulfonate (36.1 mg, 24.9  $\mu\text{L}$ , 0.22 mmol) in diethyl ether (2.0 mL) was stirred in a sealed tube at room temperature for 2 h. The mixture was filtered, washed twice with anhydrous ether, and gave 5,7-di((*E*)-benzylidene)-*N,N,N*-trimethyl-6-oxocyclohept-3-en-1-aminium triflate **7a** as a white solid (61.3 mg, 62% yield). m.p. 125 – 128  $^\circ\text{C}$ .  $^1\text{H}$  NMR (500 MHz,  $\text{DMSO}-d_6$ )  $\delta$  7.80 (s, 1H), 7.67 – 7.63 (m, 2H), 7.53 – 7.49 (m, 3H), 7.49 – 7.45 (m, 2H), 7.45 – 7.42 (m, 1H), 7.42 – 7.38 (m, 2H), 7.24 (s, 1H), 6.77 (d,  $J = 10.5$  Hz, 1H), 6.38 – 6.32 (m, 1H), 5.33 (dd,  $J = 11.5, 7.0$  Hz, 1H), 2.95 – 2.88 (m, 2H), 2.91 (s, 9H).  $^{13}\text{C}$  NMR (125 MHz,  $\text{DMSO}-d_6$ )  $\delta$  195.7, 141.4, 139.4, 137.9, 134.2, 133.92, 133.91, 131.6, 131.0, 130.6, 129.2, 129.0, 128.92, 128.87, 127.9, 120.7 (q,  $J_{\text{C-F}} = 320.3$  Hz), 70.1, 50.9, 24.2.  $^{19}\text{F}$  NMR (471 MHz,  $\text{DMSO}-d_6$ )  $\delta$  -77.76. HRMS (ESI)  $m/z$ :  $[\text{M} - \text{OTf}]^+$  Calcd for  $\text{C}_{24}\text{H}_{26}\text{ON}^+$  344.2009; Found 344.2009.

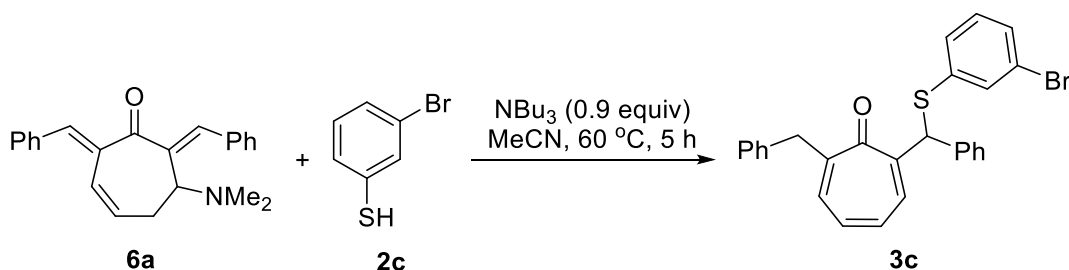

A mixture of aminated trienone **6a** (65.6 mg, 0.20 mmol), 3-bromothiophenol (**2c**) (56.7 mg, 32.0  $\mu\text{L}$ , 0.30 mmol), and tributylamine (33.4 mg, 43.0  $\mu\text{L}$ , 0.18 mmol) in acetonitrile (1.2 mL) was heated in a sealed tube at 60  $^\circ\text{C}$  (oil bath) for 5 h, and cooled to room temperature. The mixture was directly purified by silica gel chromatography, using petroleum ether/ethyl acetate (20/1) as the eluent, to give tropone **3c** as a yellow oil (58.0 mg, 61% yield).

(b) Deuterium-labelling experiments

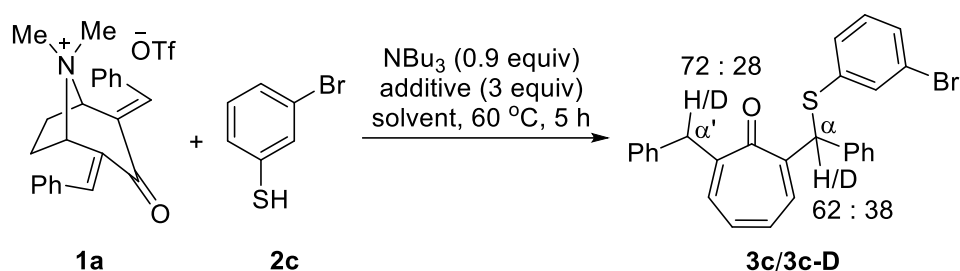

A mixture of 2,4-dibenzylidenetropinone-derived quaternary ammonium salt **1a** (95.8 mg, 0.20 mmol), 3-bromothiophenol (**2c**) (56.7 mg, 32.0  $\mu\text{L}$ , 0.30 mmol),  $\text{D}_2\text{O}$  (12.0 mg, 12.0  $\mu\text{L}$ , 0.60 mmol), and tributylamine (33.4 mg, 43.0  $\mu\text{L}$ , 0.18 mmol) in acetonitrile (1.2 mL) was heated in a sealed tube at 60 °C (oil bath) for 5 h, and cooled to room temperature. The mixture was directly purified by silica gel chromatography, using petroleum ether/ethyl acetate (20/1) as the eluent, to give tropone **3c/3c-D** as a yellow oil (74.1 mg, 78% yield) with 38% and 28% deuteration rates at the  $\alpha$ - and  $\alpha'$ -benzylic positions according to  $^1\text{H}$  NMR spectroscopic analysis.  $^1\text{H}$  NMR (500 MHz,  $\text{CDCl}_3$ )  $\delta$  7.68 (dd,  $J = 8.5, 2.5$  Hz, 1H), 7.47 (d,  $J = 7.5$  Hz, 2H), 7.40 – 7.37 (m, 1H), 7.32 – 7.23 (m, 5H), 7.23 – 7.19 (m, 2H), 7.16 (d,  $J = 7.5$  Hz, 2H), 7.13 (dd,  $J = 7.5, 1.5$  Hz, 1H), 7.08 – 7.04 (m, 1H), 6.99 (t,  $J = 8.0$  Hz, 1H), 6.95 – 6.89 (m, 1H), 6.89 – 6.83 (m, 1H), 6.33 (s, 0.62H), 4.06 – 3.96 (m, 1.44H).

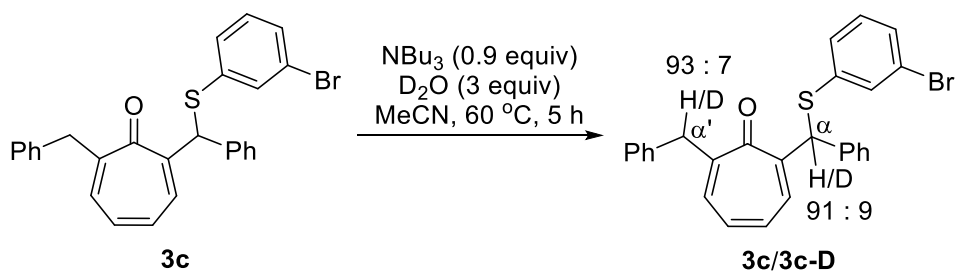

A mixture of tropone **3c** (94.7 mg, 0.20 mmol),  $\text{D}_2\text{O}$  (12.0 mg, 12.0  $\mu\text{L}$ , 0.60 mmol), and tributylamine (33.4 mg, 43.0  $\mu\text{L}$ , 0.18 mmol) in acetonitrile (1.2 mL) was heated in a sealed tube at 60 °C (oil bath) for 5 h, and cooled to room temperature. The mixture was directly purified by silica gel chromatography, using petroleum ether/ethyl acetate (20/1) as the eluent, to give tropone **3c/3c-D** as a yellow oil with 9% and 7% deuteration rates at the  $\alpha$ - and  $\alpha'$ -benzylic positions according to  $^1\text{H}$  NMR spectroscopic analysis.  $^1\text{H}$  NMR (500 MHz,  $\text{CDCl}_3$ )  $\delta$  7.69 (dd,  $J = 8.5, 1.0$  Hz, 1H), 7.46 (dd,  $J = 7.5, 1.5$  Hz, 2H), 7.31 – 7.20 (m, 9H), 7.18 – 7.14 (m, 2H), 7.11 – 7.05 (m, 3H), 6.96 – 6.90 (m, 1H), 6.89 – 6.83 (m, 1H), 6.30 (s, 0.91H), 4.07 – 3.94 (m, 1.86H).

### ESI-MS analysis of the reaction mixture (Scheme 6)

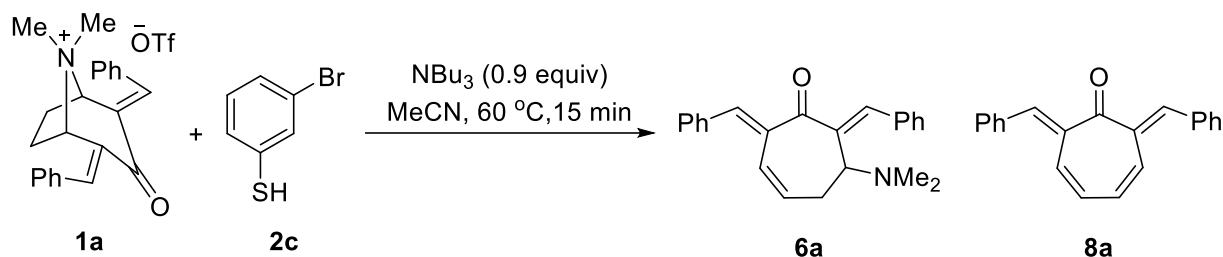

A mixture of 2,4-dibenzylidenetropinone-derived quaternary ammonium salt **1a** (95.8 mg, 0.20 mmol), 3-bromothiophenol (**2c**) (56.7 mg, 32.0  $\mu\text{L}$ , 0.30 mmol), and tributylamine (33.4 mg, 43.0  $\mu\text{L}$ , 0.18 mmol) in acetonitrile (1.2 mL) was heated in a sealed tube at 60 °C (oil bath) for 15 min, and cooled to room temperature. The mixture was subjected to electron spray ionization-mass spectrometric analysis. We tentatively assigned the following two intermediates:

Intermediate **6a**: HRMS (ESI)  $m/z$ :  $[\text{M}]^+$  Calcd for  $\text{C}_{23}\text{H}_{23}\text{NO}^+$  329.1774; Found 329.1782.

Intermediate **8a**: HRMS (ESI)  $m/z$ :  $[\text{M}+\text{H}]^+$  Calcd for  $\text{C}_{21}\text{H}_{17}\text{O}^+$  285.1274; Found 285.1277.

## References

1. T. Rerkrachaneekorn, T. Tankam, M. Sukwattanasinitt and S. Wacharasindhu, *Tetrahedron Lett.*, 2021, **70**, 153017.
2. A. B. Shapiro and A. M. Belostotskii, *Russ. Chem. Bull.*, 1989, **38**, 593.
3. G. Zheng, L. P. Dvoskin and P. A. Crooks, *Synth. Commun.*, 2004, **34**, 1931.

## Crystallographic data

The crystal of compound **4a** was obtained by leaving alone its solution in chloroform and methanol at room temperature in the open air for one week. The crystal data of compound **4a** have been deposited in CCDC with number 2260119.

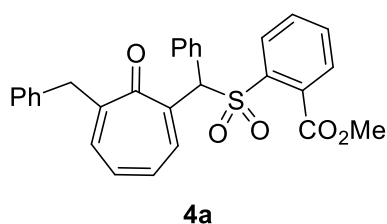

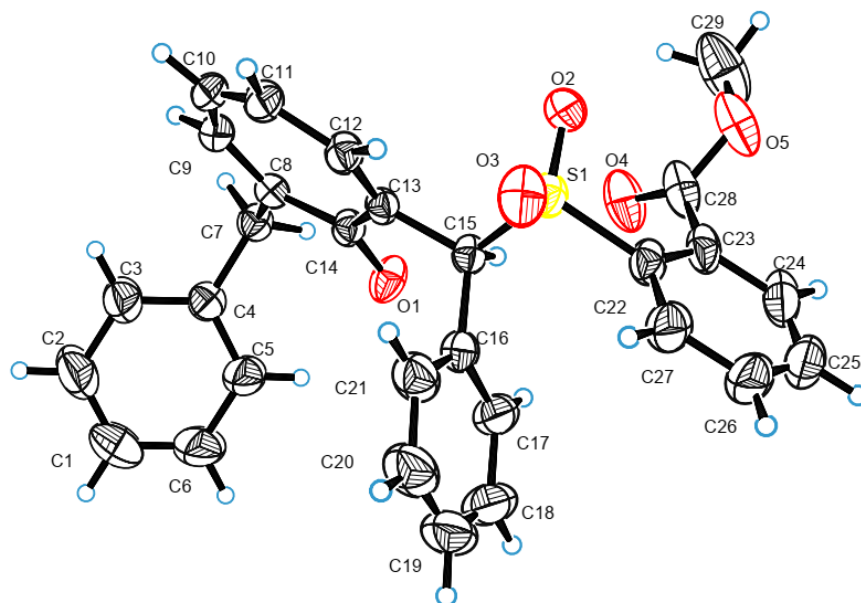

Molecular structure of compound **4a** was obtained by single-crystal X-ray diffraction studies with the ellipsoid contour at 35% probability levels.

**Table 1** Crystal data and structure refinement for HL-DER-M\_auto.

| Identification code                | HL-DER-M_auto                                    |
|------------------------------------|--------------------------------------------------|
| Empirical formula                  | C <sub>29</sub> H <sub>24</sub> O <sub>5</sub> S |
| Formula weight                     | 484.54                                           |
| Temperature/K                      | 293(2)                                           |
| Crystal system                     | monoclinic                                       |
| Space group                        | P2 <sub>1</sub> /n                               |
| a/Å                                | 12.2396(3)                                       |
| b/Å                                | 7.38829(13)                                      |
| c/Å                                | 27.2180(5)                                       |
| α/°                                | 90                                               |
| β/°                                | 92.5426(19)                                      |
| γ/°                                | 90                                               |
| Volume/Å <sup>3</sup>              | 2458.90(8)                                       |
| Z                                  | 4                                                |
| ρ <sub>calc</sub> /cm <sup>3</sup> | 1.309                                            |
| μ/mm <sup>-1</sup>                 | 1.482                                            |
| F(000)                             | 1016.0                                           |

|                                             |                                                               |
|---------------------------------------------|---------------------------------------------------------------|
| Crystal size/mm <sup>3</sup>                | 0.25 × 0.22 × 0.21                                            |
| Radiation                                   | Cu Kα (λ = 1.54184)                                           |
| 2θ range for data collection/°              | 7.796 to 145.684                                              |
| Index ranges                                | -14 ≤ h ≤ 15, -8 ≤ k ≤ 6, -30 ≤ l ≤ 33                        |
| Reflections collected                       | 8851                                                          |
| Independent reflections                     | 4740 [R <sub>int</sub> = 0.0263, R <sub>sigma</sub> = 0.0334] |
| Data/restraints/parameters                  | 4740/0/318                                                    |
| Goodness-of-fit on F <sup>2</sup>           | 1.043                                                         |
| Final R indexes [I >= 2σ (I)]               | R <sub>1</sub> = 0.0436, wR <sub>2</sub> = 0.1144             |
| Final R indexes [all data]                  | R <sub>1</sub> = 0.0554, wR <sub>2</sub> = 0.1250             |
| Largest diff. peak/hole / e Å <sup>-3</sup> | 0.21/-0.27                                                    |

**Table 2 Fractional Atomic Coordinates (×10<sup>4</sup>) and Equivalent Isotropic Displacement Parameters (Å<sup>2</sup>×10<sup>3</sup>) for HL-DER-M\_auto. U<sub>eq</sub> is defined as 1/3 of the trace of the orthogonalised U<sub>ij</sub> tensor.**

| Atom | x          | y          | z         | U(eq)     |
|------|------------|------------|-----------|-----------|
| S1   | 7531.2(4)  | 5528.5(6)  | 3600.1(2) | 49.69(15) |
| O2   | 8679.4(12) | 5548(2)    | 3514.5(5) | 62.6(4)   |
| O1   | 7996.7(13) | 7672.6(17) | 5066.3(5) | 62.0(4)   |
| O3   | 6925.6(15) | 3919(2)    | 3483.9(6) | 71.0(4)   |
| O5   | 9318.8(18) | 9293(3)    | 2993.8(6) | 91.5(6)   |
| O4   | 8825.6(18) | 9554(3)    | 3772.7(6) | 87.7(6)   |
| C13  | 7942.9(14) | 5007(2)    | 4609.3(6) | 41.0(4)   |
| C8   | 8899.6(14) | 5337(2)    | 5482.4(7) | 44.0(4)   |
| C12  | 8073.1(16) | 3210(2)    | 4529.0(7) | 48.3(4)   |
| C15  | 7351.1(14) | 6222(2)    | 4229.6(6) | 43.3(4)   |
| C14  | 8266.4(14) | 6063(2)    | 5052.7(6) | 42.9(4)   |
| C7   | 9133.5(16) | 6686(3)    | 5889.1(7) | 51.5(4)   |
| C16  | 6151.1(16) | 6540(3)    | 4317.2(7) | 52.3(4)   |
| C10  | 9132.4(17) | 2037(3)    | 5262.3(8) | 55.1(5)   |
| C4   | 8201.7(17) | 6819(3)    | 6237.0(7) | 54.7(5)   |
| C11  | 8591.9(17) | 1851(2)    | 4823.7(8) | 54.0(5)   |



| Atom | x          | y        | z          | U(eq)     |
|------|------------|----------|------------|-----------|
| C9   | 9279.5(16) | 3619(3)  | 5551.2(7)  | 50.7(4)   |
| C22  | 6899.3(18) | 7316(3)  | 3255.8(7)  | 53.9(5)   |
| C23  | 7473(2)    | 8875(3)  | 3145.2(7)  | 61.8(5)   |
| C28  | 8597(2)    | 9259(3)  | 3349.5(8)  | 71.2(7)   |
| C27  | 5831(2)    | 7066(4)  | 3081.6(9)  | 72.9(6)   |
| C21  | 5418.1(19) | 5120(4)  | 4327.1(10) | 71.7(6)   |
| C17  | 5784(2)    | 8293(4)  | 4377.8(9)  | 69.5(6)   |
| C5   | 7429(2)    | 8179(4)  | 6195.2(10) | 77.0(7)   |
| C24  | 6950(3)    | 10172(4) | 2847.2(9)  | 87.3(9)   |
| C3   | 8121(3)    | 5596(4)  | 6611.5(10) | 84.5(8)   |
| C26  | 5331(3)    | 8394(5)  | 2792.8(10) | 97.7(10)  |
| C25  | 5892(3)    | 9925(5)  | 2674.9(11) | 104.6(12) |
| C20  | 4318(2)    | 5450(6)  | 4386.8(12) | 97.2(10)  |
| C19  | 3958(2)    | 7189(6)  | 4446.4(12) | 104.2(12) |
| C18  | 4679(2)    | 8599(5)  | 4448.8(11) | 94.4(10)  |
| C1   | 6508(3)    | 7027(6)  | 6880.3(14) | 117.1(12) |
| C2   | 7271(3)    | 5699(5)  | 6932.4(13) | 116.9(13) |
| C6   | 6590(3)    | 8277(5)  | 6517.5(13) | 106.0(11) |
| C29  | 10415(3)   | 9737(6)  | 3149.5(14) | 131.6(16) |

**Table 3 Anisotropic Displacement Parameters ( $\text{\AA}^2 \times 10^3$ ) for HL-DER-M\_auto. The Anisotropic displacement factor exponent takes the form:  $-2\pi^2[h^2a^*2U_{11}+2hka^*b^*U_{12}+\dots]$ .**

| Atom | U <sub>11</sub> | U <sub>22</sub> | U <sub>33</sub> | U <sub>23</sub> | U <sub>13</sub> | U <sub>12</sub> |
|------|-----------------|-----------------|-----------------|-----------------|-----------------|-----------------|
| S1   | 65.9(3)         | 43.9(2)         | 39.1(2)         | -1.44(18)       | 0.54(19)        | 1.9(2)          |
| O2   | 68.3(9)         | 74.3(9)         | 45.8(8)         | 0.8(7)          | 8.3(6)          | 12.8(7)         |
| O1   | 94.6(11)        | 37.6(7)         | 52.7(8)         | -1.7(6)         | -10.3(7)        | 9.2(6)          |
| O3   | 105.2(12)       | 49.6(8)         | 57.4(9)         | -7.5(7)         | -7.3(8)         | -11.7(8)        |
| O5   | 125.3(16)       | 101.5(13)       | 49.1(9)         | -8.1(9)         | 21.1(9)         | -50.1(12)       |
| O4   | 132.2(16)       | 88.3(12)        | 42.9(9)         | -9.2(8)         | 6.8(9)          | -30.7(11)       |
| C13  | 45.7(8)         | 37.2(8)         | 40.5(9)         | 2.9(7)          | 6.6(7)          | -1.2(7)         |
| C8   | 43.8(9)         | 47.0(9)         | 41.5(9)         | 1.3(7)          | 6.1(7)          | 0.6(7)          |
| C12  | 60.6(11)        | 38.9(8)         | 45.6(10)        | -0.2(7)         | 5.9(8)          | -0.5(8)         |
| C15  | 52.4(9)         | 38.4(8)         | 39.1(9)         | 1.2(7)          | 1.3(7)          | -0.9(7)         |

| Atom | U <sub>11</sub> | U <sub>22</sub> | U <sub>33</sub> | U <sub>23</sub> | U <sub>13</sub> | U <sub>12</sub> |
|------|-----------------|-----------------|-----------------|-----------------|-----------------|-----------------|
| C14  | 51.0(9)         | 36.7(8)         | 41.2(9)         | 2.3(7)          | 4.7(7)          | 0.3(7)          |
| C7   | 55.1(10)        | 53.1(10)        | 46.1(10)        | -1.1(8)         | -1.2(8)         | 0.4(8)          |
| C16  | 53.4(10)        | 62.1(11)        | 41.1(10)        | 4.3(8)          | -0.3(8)         | 4.3(9)          |
| C10  | 66.9(12)        | 42.1(9)         | 57.2(12)        | 9.0(8)          | 13.1(9)         | 13.7(8)         |
| C4   | 63.9(12)        | 57.2(11)        | 42.9(10)        | -7.0(8)         | 0.1(8)          | 2.8(9)          |
| C11  | 70.7(12)        | 35.0(8)         | 57.1(12)        | 0.8(8)          | 13.0(9)         | 5.3(8)          |
| C9   | 54.4(10)        | 52.3(10)        | 45.7(10)        | 6.8(8)          | 5.8(8)          | 7.7(8)          |
| C22  | 73.4(13)        | 53.8(10)        | 34.2(9)         | -0.8(8)         | -1.2(8)         | 7.1(9)          |
| C23  | 100.6(17)       | 51.8(11)        | 33.6(9)         | -0.1(8)         | 9.5(10)         | 5.4(11)         |
| C28  | 121(2)          | 50.4(11)        | 42.8(11)        | -1.5(9)         | 15.2(12)        | -20.7(12)       |
| C27  | 78.5(15)        | 87.0(16)        | 52.3(13)        | -1.8(11)        | -7.0(11)        | 11.2(13)        |
| C21  | 59.4(12)        | 86.6(15)        | 69.3(15)        | 8.7(13)         | 4.8(11)         | -10.1(12)       |
| C17  | 68.4(14)        | 77.4(14)        | 62.5(14)        | -0.9(11)        | 1.2(11)         | 20.2(11)        |
| C5   | 82.8(16)        | 86.1(16)        | 62.5(14)        | 0.1(12)         | 7.1(12)         | 26.0(13)        |
| C24  | 149(3)          | 64.1(14)        | 50.3(14)        | 13.0(11)        | 21.0(16)        | 24.3(16)        |
| C3   | 112(2)          | 77.4(16)        | 65.9(15)        | 11.1(13)        | 25.9(14)        | 18.2(15)        |
| C26  | 97(2)           | 137(3)          | 57.4(15)        | 7.5(17)         | -7.5(14)        | 46(2)           |
| C25  | 144(3)          | 113(2)          | 57.7(16)        | 21.5(16)        | 14.5(18)        | 66(2)           |
| C20  | 58.1(15)        | 146(3)          | 88(2)           | 15(2)           | 6.7(13)         | -16.8(17)       |
| C19  | 55.2(15)        | 177(4)          | 81(2)           | 15(2)           | 9.4(13)         | 19(2)           |
| C18  | 80.0(18)        | 123(2)          | 79.6(19)        | -3.0(17)        | 0.2(14)         | 45.2(19)        |
| C1   | 120(3)          | 144(3)          | 92(2)           | -4(2)           | 54(2)           | 23(2)           |
| C2   | 160(3)          | 109(2)          | 87(2)           | 21.6(19)        | 64(2)           | 17(2)           |
| C6   | 102(2)          | 134(3)          | 85(2)           | -4(2)           | 26.1(17)        | 48(2)           |
| C29  | 136(3)          | 179(4)          | 80(2)           | -7(2)           | 18(2)           | -89(3)          |

**Table 4 Bond Lengths for HL-DER-M<sub>auto</sub>.**

| Atom | Atom | Length/Å   | Atom | Atom | Length/Å |
|------|------|------------|------|------|----------|
| S1   | O2   | 1.4348(16) | C10  | C11  | 1.346(3) |
| S1   | O3   | 1.4292(15) | C10  | C9   | 1.416(3) |
| S1   | C15  | 1.8112(18) | C4   | C5   | 1.381(3) |
| S1   | C22  | 1.776(2)   | C4   | C3   | 1.369(3) |
| O1   | C14  | 1.235(2)   | C22  | C23  | 1.389(3) |

| Atom | Atom | Length/Å | Atom | Atom | Length/Å |
|------|------|----------|------|------|----------|
| O5   | C28  | 1.339(3) | C22  | C27  | 1.384(3) |
| O5   | C29  | 1.427(4) | C23  | C28  | 1.488(4) |
| O4   | C28  | 1.193(3) | C23  | C24  | 1.393(3) |
| C13  | C12  | 1.356(2) | C27  | C26  | 1.383(4) |
| C13  | C15  | 1.527(2) | C21  | C20  | 1.385(4) |
| C13  | C14  | 1.477(2) | C17  | C18  | 1.393(4) |
| C8   | C14  | 1.475(2) | C5   | C6   | 1.382(4) |
| C8   | C7   | 1.508(3) | C24  | C25  | 1.369(5) |
| C8   | C9   | 1.361(3) | C3   | C2   | 1.390(4) |
| C12  | C11  | 1.417(3) | C26  | C25  | 1.368(5) |
| C15  | C16  | 1.517(3) | C20  | C19  | 1.371(5) |
| C7   | C4   | 1.517(3) | C19  | C18  | 1.365(5) |
| C16  | C21  | 1.381(3) | C1   | C2   | 1.357(5) |
| C16  | C17  | 1.384(3) | C1   | C6   | 1.359(5) |

**Table 5 Bond Angles for HL-DER-M\_auto.**

| Atom | Atom | Atom | Angle/°    | Atom | Atom | Atom | Angle/°    |
|------|------|------|------------|------|------|------|------------|
| O2   | S1   | C15  | 108.18(9)  | C3   | C4   | C5   | 118.0(2)   |
| O2   | S1   | C22  | 108.26(10) | C10  | C11  | C12  | 128.32(18) |
| O3   | S1   | O2   | 118.33(10) | C8   | C9   | C10  | 131.21(18) |
| O3   | S1   | C15  | 111.18(9)  | C23  | C22  | S1   | 121.20(17) |
| O3   | S1   | C22  | 106.99(10) | C27  | C22  | S1   | 117.66(17) |
| C22  | S1   | C15  | 102.72(8)  | C27  | C22  | C23  | 121.1(2)   |
| C28  | O5   | C29  | 115.5(2)   | C22  | C23  | C28  | 123.06(19) |
| C12  | C13  | C15  | 121.48(17) | C22  | C23  | C24  | 118.2(3)   |
| C12  | C13  | C14  | 128.32(17) | C24  | C23  | C28  | 118.7(2)   |
| C14  | C13  | C15  | 110.13(14) | O5   | C28  | C23  | 111.2(2)   |
| C14  | C8   | C7   | 114.66(15) | O4   | C28  | O5   | 124.1(3)   |
| C9   | C8   | C14  | 127.77(17) | O4   | C28  | C23  | 124.7(2)   |
| C9   | C8   | C7   | 117.57(17) | C26  | C27  | C22  | 119.2(3)   |
| C13  | C12  | C11  | 130.92(19) | C16  | C21  | C20  | 120.3(3)   |
| C13  | C15  | S1   | 113.56(12) | C16  | C17  | C18  | 119.4(3)   |
| C16  | C15  | S1   | 110.60(12) | C4   | C5   | C6   | 120.7(3)   |

| Atom | Atom | Atom | Angle/°    | Atom | Atom | Atom | Angle/°  |
|------|------|------|------------|------|------|------|----------|
| C16  | C15  | C13  | 114.71(15) | C25  | C24  | C23  | 120.7(3) |
| O1   | C14  | C13  | 118.10(16) | C4   | C3   | C2   | 120.8(3) |
| O1   | C14  | C8   | 117.29(16) | C25  | C26  | C27  | 120.4(3) |
| C8   | C14  | C13  | 124.61(15) | C26  | C25  | C24  | 120.4(3) |
| C8   | C7   | C4   | 112.17(16) | C19  | C20  | C21  | 119.9(3) |
| C21  | C16  | C15  | 121.34(19) | C18  | C19  | C20  | 120.4(3) |
| C21  | C16  | C17  | 119.6(2)   | C19  | C18  | C17  | 120.4(3) |
| C17  | C16  | C15  | 119.04(19) | C2   | C1   | C6   | 119.6(3) |
| C11  | C10  | C9   | 128.48(17) | C1   | C2   | C3   | 120.3(3) |
| C5   | C4   | C7   | 121.8(2)   | C1   | C6   | C5   | 120.4(3) |
| C3   | C4   | C7   | 120.2(2)   |      |      |      |          |

**Table 6 Torsion Angles for HL-DER-M\_auto.**

| A   | B   | C   | D   | Angle/°     | A   | B   | C   | D   | Angle/°     |
|-----|-----|-----|-----|-------------|-----|-----|-----|-----|-------------|
| S1  | C15 | C16 | C21 | 70.0(2)     | C7  | C8  | C9  | C10 | 174.82(19)  |
| S1  | C15 | C16 | C17 | -108.58(19) | C7  | C4  | C5  | C6  | -179.7(3)   |
| S1  | C22 | C23 | C28 | -7.1(3)     | C7  | C4  | C3  | C2  | -179.9(3)   |
| S1  | C22 | C23 | C24 | 175.94(17)  | C16 | C21 | C20 | C19 | -1.3(5)     |
| S1  | C22 | C27 | C26 | -177.0(2)   | C16 | C17 | C18 | C19 | -1.6(4)     |
| O2  | S1  | C15 | C13 | -59.09(14)  | C4  | C5  | C6  | C1  | -0.4(5)     |
| O2  | S1  | C15 | C16 | 170.29(13)  | C4  | C3  | C2  | C1  | -0.4(6)     |
| O2  | S1  | C22 | C23 | -28.39(19)  | C11 | C10 | C9  | C8  | 2.7(4)      |
| O2  | S1  | C22 | C27 | 148.60(17)  | C9  | C8  | C14 | O1  | 179.67(19)  |
| O3  | S1  | C15 | C13 | 72.43(15)   | C9  | C8  | C14 | C13 | -0.8(3)     |
| O3  | S1  | C15 | C16 | -58.19(15)  | C9  | C8  | C7  | C4  | -94.3(2)    |
| O3  | S1  | C22 | C23 | -156.96(16) | C9  | C10 | C11 | C12 | 3.1(4)      |
| O3  | S1  | C22 | C27 | 20.0(2)     | C22 | S1  | C15 | C13 | -173.44(13) |
| C13 | C12 | C11 | C10 | -2.6(4)     | C22 | S1  | C15 | C16 | 55.94(15)   |
| C13 | C15 | C16 | C21 | -60.0(2)    | C22 | C23 | C28 | O5  | 115.0(2)    |
| C13 | C15 | C16 | C17 | 121.4(2)    | C22 | C23 | C28 | O4  | -67.0(3)    |
| C8  | C7  | C4  | C5  | -98.4(2)    | C22 | C23 | C24 | C25 | 1.0(4)      |
| C8  | C7  | C4  | C3  | 83.0(3)     | C22 | C27 | C26 | C25 | 0.9(4)      |
| C12 | C13 | C15 | S1  | -32.6(2)    | C23 | C22 | C27 | C26 | 0.0(3)      |

| A   | B   | C   | D   | Angle/°     | A   | B   | C   | D   | Angle/°   |
|-----|-----|-----|-----|-------------|-----|-----|-----|-----|-----------|
| C12 | C13 | C15 | C16 | 95.9(2)     | C23 | C24 | C25 | C26 | 0.0(4)    |
| C12 | C13 | C14 | O1  | -174.46(19) | C28 | C23 | C24 | C25 | -176.1(2) |
| C12 | C13 | C14 | C8  | 6.0(3)      | C27 | C22 | C23 | C28 | 176.0(2)  |
| C15 | S1  | C22 | C23 | 85.89(17)   | C27 | C22 | C23 | C24 | -1.0(3)   |
| C15 | S1  | C22 | C27 | -97.11(18)  | C27 | C26 | C25 | C24 | -0.9(5)   |
| C15 | C13 | C12 | C11 | 179.53(19)  | C21 | C16 | C17 | C18 | 0.1(3)    |
| C15 | C13 | C14 | O1  | 2.6(2)      | C21 | C20 | C19 | C18 | -0.2(5)   |
| C15 | C13 | C14 | C8  | -176.92(16) | C17 | C16 | C21 | C20 | 1.4(4)    |
| C15 | C16 | C21 | C20 | -177.2(2)   | C5  | C4  | C3  | C2  | 1.5(5)    |
| C15 | C16 | C17 | C18 | 178.7(2)    | C24 | C23 | C28 | O5  | -68.0(3)  |
| C14 | C13 | C12 | C11 | -3.7(3)     | C24 | C23 | C28 | O4  | 109.9(3)  |
| C14 | C13 | C15 | S1  | 150.06(12)  | C3  | C4  | C5  | C6  | -1.1(4)   |
| C14 | C13 | C15 | C16 | -81.40(18)  | C20 | C19 | C18 | C17 | 1.7(5)    |
| C14 | C8  | C7  | C4  | 85.3(2)     | C2  | C1  | C6  | C5  | 1.5(7)    |
| C14 | C8  | C9  | C10 | -4.7(3)     | C6  | C1  | C2  | C3  | -1.2(7)   |
| C7  | C8  | C14 | O1  | 0.2(2)      | C29 | O5  | C28 | O4  | -0.8(4)   |
| C7  | C8  | C14 | C13 | 179.71(16)  | C29 | O5  | C28 | C23 | 177.2(3)  |

**Table 7 Hydrogen Atom Coordinates ( $\text{\AA}\times 10^4$ ) and Isotropic Displacement Parameters ( $\text{\AA}^2\times 10^3$ ) for HL-DER-M\_auto.**

| Atom | x    | y     | z    | U(eq) |
|------|------|-------|------|-------|
| H12  | 7771 | 2799  | 4230 | 58    |
| H15  | 7702 | 7411  | 4263 | 52    |
| H7A  | 9259 | 7867  | 5746 | 62    |
| H7B  | 9796 | 6332  | 6073 | 62    |
| H10  | 9451 | 989   | 5393 | 66    |
| H11  | 8554 | 682   | 4698 | 65    |
| H9   | 9711 | 3457  | 5838 | 61    |
| H27  | 5453 | 6017  | 3158 | 88    |
| H21  | 5664 | 3937  | 4293 | 86    |
| H17  | 6270 | 9259  | 4371 | 83    |
| H5   | 7475 | 9039  | 5947 | 92    |
| H24  | 7323 | 11218 | 2764 | 105   |

| Atom | x     | y     | z    | U(eq) |
|------|-------|-------|------|-------|
| H3   | 8642  | 4685  | 6652 | 101   |
| H26  | 4610  | 8247  | 2678 | 117   |
| H25  | 5553  | 10802 | 2477 | 126   |
| H20  | 3824  | 4493  | 4386 | 117   |
| H19  | 3219  | 7410  | 4486 | 125   |
| H18  | 4430  | 9772  | 4498 | 113   |
| H1   | 5933  | 7080  | 7092 | 140   |
| H2   | 7224  | 4855  | 7184 | 140   |
| H6   | 6079  | 9205  | 6486 | 127   |
| H29A | 10889 | 9548  | 2882 | 197   |
| H29B | 10644 | 8979  | 3421 | 197   |
| H29C | 10450 | 10983 | 3249 | 197   |

The crystal of compound **7a** was obtained by leaving alone its solution in chloroform and hexane at room temperature in the open air for two days. The crystal data of compound **7a** have been deposited in CCDC with number 2260124.

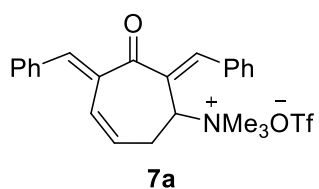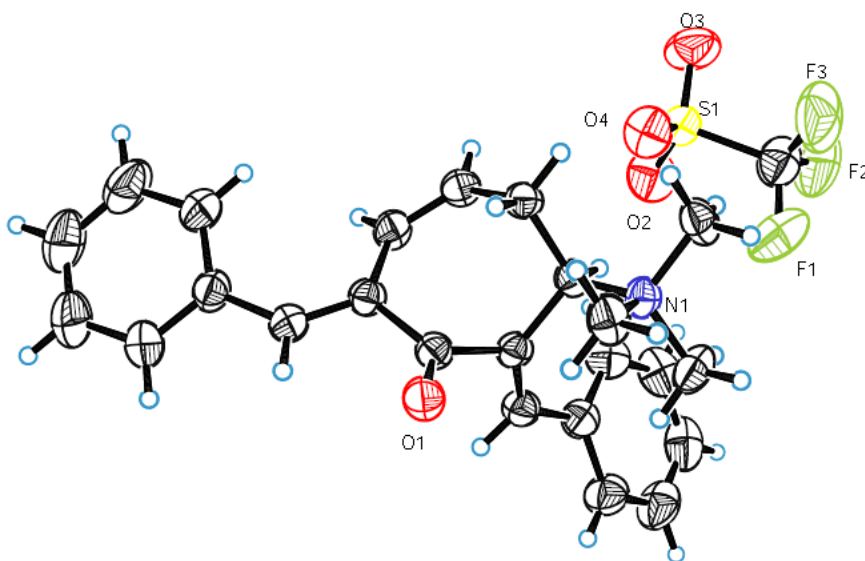

Molecular structure of compound **7a** was obtained by single-crystal X-ray diffraction studies with the ellipsoid contour at 35% probability levels.

**Table 1 Crystal data and structure refinement for hl-1\_autored.**

|                                             |                                                                  |
|---------------------------------------------|------------------------------------------------------------------|
| Identification code                         | hl-1_autored                                                     |
| Empirical formula                           | C <sub>25</sub> H <sub>26</sub> F <sub>3</sub> NO <sub>4</sub> S |
| Formula weight                              | 493.53                                                           |
| Temperature/K                               | 293(2)                                                           |
| Crystal system                              | monoclinic                                                       |
| Space group                                 | P2 <sub>1</sub> /c                                               |
| a/Å                                         | 15.2016(2)                                                       |
| b/Å                                         | 16.5260(2)                                                       |
| c/Å                                         | 11.22516(19)                                                     |
| α/°                                         | 90                                                               |
| β/°                                         | 103.2304(16)                                                     |
| γ/°                                         | 90                                                               |
| Volume/Å <sup>3</sup>                       | 2745.15(7)                                                       |
| Z                                           | 4                                                                |
| ρ <sub>calc</sub> /cm <sup>3</sup>          | 1.194                                                            |
| μ/mm <sup>-1</sup>                          | 1.474                                                            |
| F(000)                                      | 1032.0                                                           |
| Crystal size/mm <sup>3</sup>                | 0.22 × 0.15 × 0.14                                               |
| Radiation                                   | Cu Kα (λ = 1.54184)                                              |
| 2θ range for data collection/°              | 8.02 to 145.978                                                  |
| Index ranges                                | -17 ≤ h ≤ 18, -12 ≤ k ≤ 20, -13 ≤ l ≤ 12                         |
| Reflections collected                       | 10398                                                            |
| Independent reflections                     | 5335 [R <sub>int</sub> = 0.0190, R <sub>sigma</sub> = 0.0263]    |
| Data/restraints/parameters                  | 5335/0/311                                                       |
| Goodness-of-fit on F <sup>2</sup>           | 1.081                                                            |
| Final R indexes [I >= 2σ (I)]               | R <sub>1</sub> = 0.0503, wR <sub>2</sub> = 0.1484                |
| Final R indexes [all data]                  | R <sub>1</sub> = 0.0568, wR <sub>2</sub> = 0.1555                |
| Largest diff. peak/hole / e Å <sup>-3</sup> | 0.36/-0.25                                                       |

**Table 2 Fractional Atomic Coordinates ( $\times 10^4$ ) and Equivalent Isotropic Displacement Parameters ( $\text{\AA}^2 \times 10^3$ ) for hl-1\_autored.  $U_{eq}$  is defined as 1/3 of the trace of the orthogonalised  $U_{ij}$  tensor.**

| Atom | <i>x</i>    | <i>y</i>   | <i>z</i>   | $U_{eq}$  |
|------|-------------|------------|------------|-----------|
| S1   | -828.4(3)   | 3358.0(3)  | 2897.9(5)  | 59.65(18) |
| O1   | 3931.0(9)   | 5321.3(8)  | 4829.1(14) | 64.4(4)   |
| N1   | 1440.2(10)  | 5693.0(9)  | 3304.5(14) | 50.4(4)   |
| O4   | -248.9(12)  | 3916.3(11) | 3657.2(17) | 85.7(5)   |
| C6   | 1708.4(11)  | 4825.5(10) | 3785.0(16) | 46.2(4)   |
| C2   | 3536.0(12)  | 4123.2(11) | 5771.7(17) | 49.3(4)   |
| O2   | -382.4(15)  | 2748.6(11) | 2367(2)    | 100.6(6)  |
| C7   | 2654.7(12)  | 4607.6(10) | 3677.6(16) | 47.1(4)   |
| C5   | 1633.7(12)  | 4718.8(11) | 5106.1(17) | 51.6(4)   |
| C3   | 2753.9(13)  | 3613.3(11) | 5816.0(19) | 56.0(4)   |
| C1   | 3416.6(12)  | 4752.6(10) | 4791.2(17) | 49.0(4)   |
| F1   | -726.3(19)  | 4310.7(14) | 1090(2)    | 139.9(8)  |
| C4   | 1901.8(13)  | 3869.4(12) | 5510.2(19) | 57.3(5)   |
| C15  | 4386.2(13)  | 4022.1(12) | 6438.3(17) | 54.3(4)   |
| O3   | -1557.9(15) | 3074.2(16) | 3367(2)    | 114.7(8)  |
| C8   | 2888.4(13)  | 4224.4(12) | 2743.1(18) | 56.5(4)   |
| F2   | -1902.2(18) | 3559.4(19) | 760.1(19)  | 159.5(10) |
| C9   | 2328.8(14)  | 3902.6(12) | 1598.3(19) | 58.5(5)   |
| C23  | 498.9(13)   | 5875.5(13) | 3443(2)    | 65.5(5)   |
| F3   | -1814(2)    | 4565.3(16) | 1958(2)    | 161.9(11) |
| C22  | 2065.6(14)  | 6330.6(11) | 3977(2)    | 64.8(5)   |
| C16  | 4753.3(14)  | 3437.2(13) | 7391.5(18) | 59.7(5)   |
| C24  | 1439.4(19)  | 5744.3(15) | 1974(2)    | 74.9(6)   |
| C14  | 2623.5(19)  | 4007.4(17) | 522(2)     | 78.4(7)   |
| C11  | 1038.5(19)  | 3175.2(16) | 441(3)     | 84.0(7)   |
| C17  | 4250.6(18)  | 3040.7(17) | 8106(2)    | 78.2(7)   |
| C12  | 1327(2)     | 3287.8(18) | -610(3)    | 90.2(8)   |
| C13  | 2115(2)     | 3705(2)    | -573(2)    | 95.0(9)   |
| C21  | 5678.6(17)  | 3281.7(19) | 7618(2)    | 86.4(8)   |



**Table 2 Fractional Atomic Coordinates ( $\times 10^4$ ) and Equivalent Isotropic Displacement Parameters ( $\text{\AA}^2 \times 10^3$ ) for hl-1\_autored.  $U_{eq}$  is defined as 1/3 of the trace of the orthogonalised  $U_{ij}$  tensor.**

| Atom | x          | y          | z       | U(eq)     |
|------|------------|------------|---------|-----------|
| C25  | -1350(2)   | 3971(2)    | 1599(3) | 93.7(8)   |
| C18  | 4657(3)    | 2489(2)    | 8985(3) | 105.6(10) |
| C19  | 5566(3)    | 2322(2)    | 9154(3) | 118.5(12) |
| C20  | 6076(2)    | 2716(2)    | 8484(3) | 116.0(12) |
| C10  | 1533.9(17) | 3470.7(13) | 1545(2) | 72.0(6)   |

**Table 3 Anisotropic Displacement Parameters ( $\text{\AA}^2 \times 10^3$ ) for hl-1\_autored. The Anisotropic displacement factor exponent takes the form:  $-2\pi^2[h^2a^*U_{11}+2hka^*b^*U_{12}+\dots]$ .**

| Atom | $U_{11}$  | $U_{22}$  | $U_{33}$  | $U_{23}$  | $U_{13}$  | $U_{12}$  |
|------|-----------|-----------|-----------|-----------|-----------|-----------|
| S1   | 66.2(3)   | 51.0(3)   | 59.2(3)   | -5.6(2)   | 9.0(2)    | -8.2(2)   |
| O1   | 55.0(7)   | 57.9(8)   | 77.2(9)   | 15.1(7)   | 8.6(6)    | -10.2(6)  |
| N1   | 53.9(8)   | 42.3(7)   | 53.4(8)   | 3.7(6)    | 9.2(6)    | 3.2(6)    |
| O4   | 90.8(11)  | 75.5(10)  | 82.7(11)  | -18.5(9)  | 3.4(9)    | -20.5(9)  |
| C6   | 49.2(9)   | 37.9(8)   | 51.2(9)   | 1.3(7)    | 11.1(7)   | 0.6(7)    |
| C2   | 51.5(9)   | 45.3(9)   | 52.0(9)   | 3.7(7)    | 13.8(7)   | 1.9(7)    |
| O2   | 124.6(16) | 63.7(10)  | 113.2(15) | -16.2(10) | 26.9(12)  | 15.5(10)  |
| C7   | 50.5(9)   | 42.1(8)   | 49.8(9)   | 5.6(7)    | 14.0(7)   | 0.8(7)    |
| C5   | 51.3(9)   | 50.5(9)   | 56.4(10)  | 4.9(8)    | 19.2(8)   | 2.3(7)    |
| C3   | 59.8(10)  | 43.0(9)   | 64.5(11)  | 12.4(8)   | 13.0(9)   | -2.1(8)   |
| C1   | 46.9(9)   | 46.0(9)   | 55.2(10)  | 5.4(7)    | 13.8(7)   | 0.8(7)    |
| F1   | 201(2)    | 123.7(16) | 104.2(14) | 35.8(12)  | 54.5(15)  | -11.7(16) |
| C4   | 55.6(10)  | 52.0(10)  | 65.9(12)  | 12.7(9)   | 16.8(9)   | -7.7(8)   |
| C15  | 54.1(10)  | 56.2(10)  | 53.0(10)  | 5.2(8)    | 13.4(8)   | -0.8(8)   |
| O3   | 103.7(14) | 143.7(19) | 103.2(15) | 11.5(14)  | 37.3(12)  | -46.1(14) |
| C8   | 56.3(10)  | 57.5(10)  | 58.3(11)  | 3.3(8)    | 18.8(8)   | 4.8(8)    |
| F2   | 166(2)    | 191(2)    | 86.6(13)  | -6.7(14)  | -42.6(13) | 0.7(18)   |
| C9   | 66.4(11)  | 53.6(10)  | 57.8(11)  | -1.9(8)   | 18.9(9)   | 13.5(9)   |
| C23  | 51.3(10)  | 54.8(11)  | 88.0(15)  | 7.3(10)   | 11.0(10)  | 8.7(8)    |

**Table 3 Anisotropic Displacement Parameters ( $\text{\AA}^2 \times 10^3$ ) for hl-1\_autored. The Anisotropic displacement factor exponent takes the form:  $-2\pi^2[h^2a^{*2}U_{11}+2hka^*b^*U_{12}+\dots]$ .**

| Atom | U <sub>11</sub> | U <sub>22</sub> | U <sub>33</sub> | U <sub>23</sub> | U <sub>13</sub> | U <sub>12</sub> |
|------|-----------------|-----------------|-----------------|-----------------|-----------------|-----------------|
| F3   | 192(2)          | 137.8(18)       | 145.0(19)       | 23.3(16)        | 17.0(17)        | 91.1(19)        |
| C22  | 62.5(11)        | 42.1(9)         | 84.3(14)        | 5.5(9)          | 5.7(10)         | -3.5(8)         |
| C16  | 62.9(11)        | 61.1(11)        | 52.9(10)        | 7.8(9)          | 8.6(9)          | 5.5(9)          |
| C24  | 103.2(17)       | 66.6(13)        | 54.1(12)        | 15.4(10)        | 16.1(11)        | 16.9(12)        |
| C14  | 88.9(16)        | 87.9(16)        | 63.4(13)        | -2.1(12)        | 28.1(12)        | 10.7(13)        |
| C11  | 83.1(16)        | 66.1(13)        | 98.0(19)        | -26.5(13)       | 11.0(14)        | 8.0(12)         |
| C17  | 78.3(15)        | 87.8(16)        | 68.5(14)        | 24.5(12)        | 16.7(11)        | 0.9(12)         |
| C12  | 99(2)           | 84.0(17)        | 76.2(17)        | -19.7(14)       | -3.9(14)        | 28.7(15)        |
| C13  | 124(2)          | 105(2)          | 56.7(13)        | -3.7(14)        | 22.5(14)        | 32.0(19)        |
| C21  | 64.9(13)        | 113(2)          | 77.2(15)        | 23.1(15)        | 7.9(11)         | 15.6(13)        |
| C25  | 109(2)          | 90.8(19)        | 77.4(17)        | 0.4(15)         | 12.6(16)        | 11.1(17)        |
| C18  | 135(3)          | 97(2)           | 80.5(18)        | 37.7(16)        | 13.9(18)        | -7.9(19)        |
| C19  | 130(3)          | 105(2)          | 105(2)          | 44(2)           | -4(2)           | 31(2)           |
| C20  | 94(2)           | 140(3)          | 105(2)          | 36(2)           | 2.9(18)         | 44(2)           |
| C10  | 84.4(15)        | 56.6(11)        | 78.5(15)        | -15.3(10)       | 25.8(12)        | 1.6(11)         |

**Table 4 Bond Lengths for hl-1\_autored.**

| Atom | Atom | Length/ $\text{\AA}$ | Atom | Atom | Length/ $\text{\AA}$ |
|------|------|----------------------|------|------|----------------------|
| S1   | O4   | 1.4179(16)           | F1   | C25  | 1.337(4)             |
| S1   | O2   | 1.4188(19)           | C15  | C16  | 1.455(3)             |
| S1   | O3   | 1.4124(19)           | C8   | C9   | 1.469(3)             |
| S1   | C25  | 1.804(3)             | F2   | C25  | 1.301(4)             |
| O1   | C1   | 1.217(2)             | C9   | C14  | 1.392(3)             |
| N1   | C6   | 1.553(2)             | C9   | C10  | 1.393(3)             |
| N1   | C23  | 1.505(2)             | F3   | C25  | 1.323(4)             |
| N1   | C22  | 1.502(2)             | C16  | C17  | 1.392(3)             |
| N1   | C24  | 1.496(3)             | C16  | C21  | 1.395(3)             |
| C6   | C7   | 1.514(2)             | C14  | C13  | 1.387(4)             |
| C6   | C5   | 1.523(3)             | C11  | C12  | 1.362(4)             |

**Table 4 Bond Lengths for hl-1\_autored.**

| Atom | Atom | Length/Å | Atom | Atom | Length/Å |
|------|------|----------|------|------|----------|
| C2   | C3   | 1.467(3) | C11  | C10  | 1.383(3) |
| C2   | C1   | 1.495(2) | C17  | C18  | 1.380(4) |
| C2   | C15  | 1.347(3) | C12  | C13  | 1.374(4) |
| C7   | C1   | 1.516(3) | C21  | C20  | 1.384(4) |
| C7   | C8   | 1.341(3) | C18  | C19  | 1.379(5) |
| C5   | C4   | 1.503(3) | C19  | C20  | 1.362(5) |
| C3   | C4   | 1.331(3) |      |      |          |

**Table 5 Bond Angles for hl-1\_autored.**

| Atom | Atom | Atom | Angle/°    | Atom | Atom | Atom | Angle/°    |
|------|------|------|------------|------|------|------|------------|
| O4   | S1   | O2   | 115.05(13) | C3   | C4   | C5   | 123.76(17) |
| O4   | S1   | C25  | 102.59(13) | C2   | C15  | C16  | 130.43(18) |
| O2   | S1   | C25  | 102.93(14) | C7   | C8   | C9   | 130.64(18) |
| O3   | S1   | O4   | 115.13(13) | C14  | C9   | C8   | 118.5(2)   |
| O3   | S1   | O2   | 114.35(15) | C14  | C9   | C10  | 118.3(2)   |
| O3   | S1   | C25  | 104.51(16) | C10  | C9   | C8   | 123.12(19) |
| C23  | N1   | C6   | 109.24(14) | C17  | C16  | C15  | 124.6(2)   |
| C22  | N1   | C6   | 112.80(13) | C17  | C16  | C21  | 118.2(2)   |
| C22  | N1   | C23  | 108.38(16) | C21  | C16  | C15  | 117.2(2)   |
| C24  | N1   | C6   | 109.83(14) | C13  | C14  | C9   | 119.9(3)   |
| C24  | N1   | C23  | 107.94(17) | C12  | C11  | C10  | 120.7(3)   |
| C24  | N1   | C22  | 108.53(17) | C18  | C17  | C16  | 120.5(3)   |
| C7   | C6   | N1   | 111.75(13) | C11  | C12  | C13  | 119.5(3)   |
| C7   | C6   | C5   | 109.50(14) | C12  | C13  | C14  | 120.9(3)   |
| C5   | C6   | N1   | 111.89(14) | C20  | C21  | C16  | 120.8(3)   |
| C3   | C2   | C1   | 117.50(16) | F1   | C25  | S1   | 110.9(2)   |
| C15  | C2   | C3   | 126.26(17) | F2   | C25  | S1   | 112.5(2)   |
| C15  | C2   | C1   | 115.76(16) | F2   | C25  | F1   | 108.3(3)   |
| C6   | C7   | C1   | 117.21(15) | F2   | C25  | F3   | 108.0(3)   |
| C8   | C7   | C6   | 126.95(17) | F3   | C25  | S1   | 109.7(2)   |

**Table 5 Bond Angles for hl-1\_autored.**

| Atom | Atom | Atom | Angle/°    | Atom | Atom | Atom | Angle/°  |
|------|------|------|------------|------|------|------|----------|
| C8   | C7   | C1   | 115.49(16) | F3   | C25  | F1   | 107.4(3) |
| C4   | C5   | C6   | 109.06(16) | C19  | C18  | C17  | 120.1(3) |
| C4   | C3   | C2   | 123.84(17) | C20  | C19  | C18  | 120.5(3) |
| O1   | C1   | C2   | 122.87(17) | C19  | C20  | C21  | 119.9(3) |
| O1   | C1   | C7   | 120.96(16) | C11  | C10  | C9   | 120.6(2) |
| C2   | C1   | C7   | 115.98(15) |      |      |      |          |

**Table 6 Torsion Angles for hl-1\_autored.**

| A  | B   | C   | D   | Angle/°    | A   | B   | C   | D   | Angle/°     |
|----|-----|-----|-----|------------|-----|-----|-----|-----|-------------|
| N1 | C6  | C7  | C1  | 94.25(17)  | C15 | C2  | C1  | C7  | 150.20(17)  |
| N1 | C6  | C7  | C8  | -92.9(2)   | C15 | C16 | C17 | C18 | 179.5(3)    |
| N1 | C6  | C5  | C4  | 179.99(14) | C15 | C16 | C21 | C20 | -178.1(3)   |
| O4 | S1  | C25 | F1  | 56.9(2)    | O3  | S1  | C25 | F1  | 177.4(2)    |
| O4 | S1  | C25 | F2  | 178.3(2)   | O3  | S1  | C25 | F2  | -61.2(3)    |
| O4 | S1  | C25 | F3  | -61.5(3)   | O3  | S1  | C25 | F3  | 59.0(3)     |
| C6 | C7  | C1  | O1  | -104.7(2)  | C8  | C7  | C1  | O1  | 81.6(2)     |
| C6 | C7  | C1  | C2  | 80.21(19)  | C8  | C7  | C1  | C2  | -93.5(2)    |
| C6 | C7  | C8  | C9  | -0.9(3)    | C8  | C9  | C14 | C13 | 179.5(2)    |
| C6 | C5  | C4  | C3  | 76.9(3)    | C8  | C9  | C10 | C11 | -179.4(2)   |
| C2 | C3  | C4  | C5  | -1.4(3)    | C9  | C14 | C13 | C12 | -1.2(4)     |
| C2 | C15 | C16 | C17 | -23.9(4)   | C23 | N1  | C6  | C7  | -179.63(15) |
| C2 | C15 | C16 | C21 | 157.7(2)   | C23 | N1  | C6  | C5  | -56.43(19)  |
| O2 | S1  | C25 | F1  | -62.9(2)   | C22 | N1  | C6  | C7  | -59.0(2)    |
| O2 | S1  | C25 | F2  | 58.6(3)    | C22 | N1  | C6  | C5  | 64.2(2)     |
| O2 | S1  | C25 | F3  | 178.7(2)   | C16 | C17 | C18 | C19 | -0.5(5)     |
| C7 | C6  | C5  | C4  | -55.55(19) | C16 | C21 | C20 | C19 | -2.1(6)     |
| C7 | C8  | C9  | C14 | 139.2(2)   | C24 | N1  | C6  | C7  | 62.2(2)     |
| C7 | C8  | C9  | C10 | -43.3(3)   | C24 | N1  | C6  | C5  | -174.64(17) |
| C5 | C6  | C7  | C1  | -30.3(2)   | C14 | C9  | C10 | C11 | -1.9(3)     |
| C5 | C6  | C7  | C8  | 142.60(18) | C11 | C12 | C13 | C14 | 0.5(4)      |

**Table 6 Torsion Angles for hl-1\_autored.**

| A   | B  | C   | D   | Angle/°    | A   | B   | C   | D   | Angle/° |
|-----|----|-----|-----|------------|-----|-----|-----|-----|---------|
| C3  | C2 | C1  | O1  | 162.56(19) | C17 | C16 | C21 | C20 | 3.5(4)  |
| C3  | C2 | C1  | C7  | -22.4(2)   | C17 | C18 | C19 | C20 | 2.0(6)  |
| C3  | C2 | C15 | C16 | -3.4(3)    | C12 | C11 | C10 | C9  | 1.2(4)  |
| C1  | C2 | C3  | C4  | -33.4(3)   | C21 | C16 | C17 | C18 | -2.2(4) |
| C1  | C2 | C15 | C16 | -175.3(2)  | C18 | C19 | C20 | C21 | -0.7(6) |
| C1  | C7 | C8  | C9  | 172.08(19) | C10 | C9  | C14 | C13 | 1.9(4)  |
| C15 | C2 | C3  | C4  | 154.9(2)   | C10 | C11 | C12 | C13 | -0.5(4) |
| C15 | C2 | C1  | O1  | -24.8(3)   |     |     |     |     |         |

**Table 7 Hydrogen Atom Coordinates ( $\text{\AA} \times 10^4$ ) and Isotropic Displacement Parameters ( $\text{\AA}^2 \times 10^3$ ) for hl-1\_autored.**

| Atom | x    | y    | z    | U(eq) |
|------|------|------|------|-------|
| H6   | 1288 | 4445 | 3279 | 55    |
| H5A  | 2027 | 5102 | 5628 | 62    |
| H5B  | 1018 | 4821 | 5170 | 62    |
| H3   | 2860 | 3080 | 6073 | 67    |
| H4   | 1446 | 3502 | 5549 | 69    |
| H15  | 4806 | 4385 | 6261 | 65    |
| H8   | 3507 | 4150 | 2835 | 68    |
| H23A | 101  | 5444 | 3090 | 98    |
| H23B | 294  | 6373 | 3031 | 98    |
| H23C | 501  | 5925 | 4295 | 98    |
| H22A | 2046 | 6326 | 4826 | 97    |
| H22B | 1879 | 6852 | 3633 | 97    |
| H22C | 2671 | 6222 | 3901 | 97    |
| H24A | 2040 | 5652 | 1866 | 112   |
| H24B | 1239 | 6272 | 1670 | 112   |
| H24C | 1039 | 5342 | 1531 | 112   |
| H14  | 3161 | 4280 | 538  | 94    |
| H11  | 503  | 2897 | 416  | 101   |
| H17  | 3636 | 3148 | 7991 | 94    |

**Table 7 Hydrogen Atom Coordinates ( $\text{\AA}\times 10^4$ ) and Isotropic Displacement Parameters ( $\text{\AA}^2\times 10^3$ ) for hl-1\_autored.**

| Atom | <i>x</i> | <i>y</i> | <i>z</i> | U(eq) |
|------|----------|----------|----------|-------|
| H12  | 993      | 3084     | -1348    | 108   |
| H13  | 2309     | 3786     | -1291    | 114   |
| H21  | 6033     | 3562     | 7182     | 104   |
| H18  | 4317     | 2230     | 9463     | 127   |
| H19  | 5833     | 1937     | 9729     | 142   |
| H20  | 6690     | 2604     | 8609     | 139   |
| H10  | 1334     | 3380     | 2257     | 86    |

**Table 8 Solvent masks information for hl-1\_autored.**

| Number | X     | Y     | Z     | Volume | Electron count | Content |
|--------|-------|-------|-------|--------|----------------|---------|
| 1      | 0.500 | 0.500 | 1.000 | 202.8  | 45.5           | ?       |
| 2      | 0.500 | 1.000 | 0.500 | 202.8  | 45.5           | ?       |

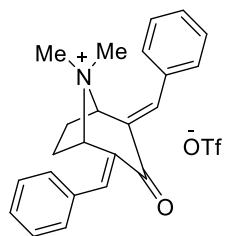

**1a**

$^1\text{H}$  NMR (500 MHz, DMSO- $d_6$ )

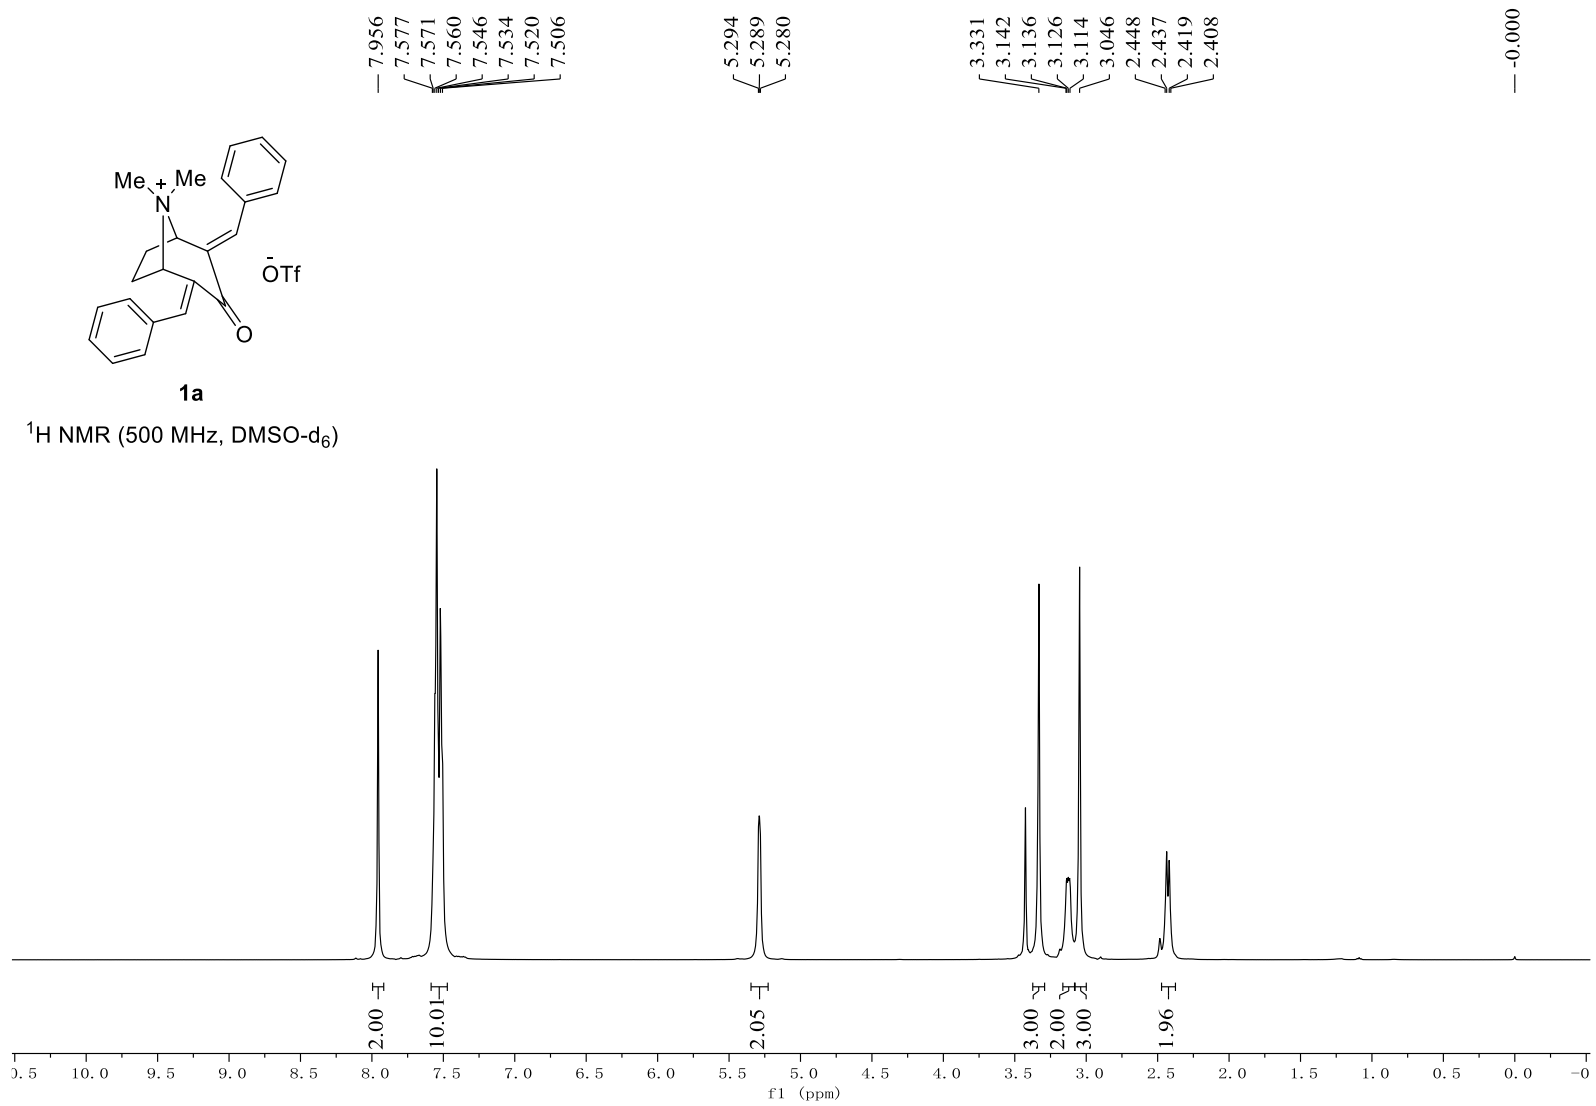

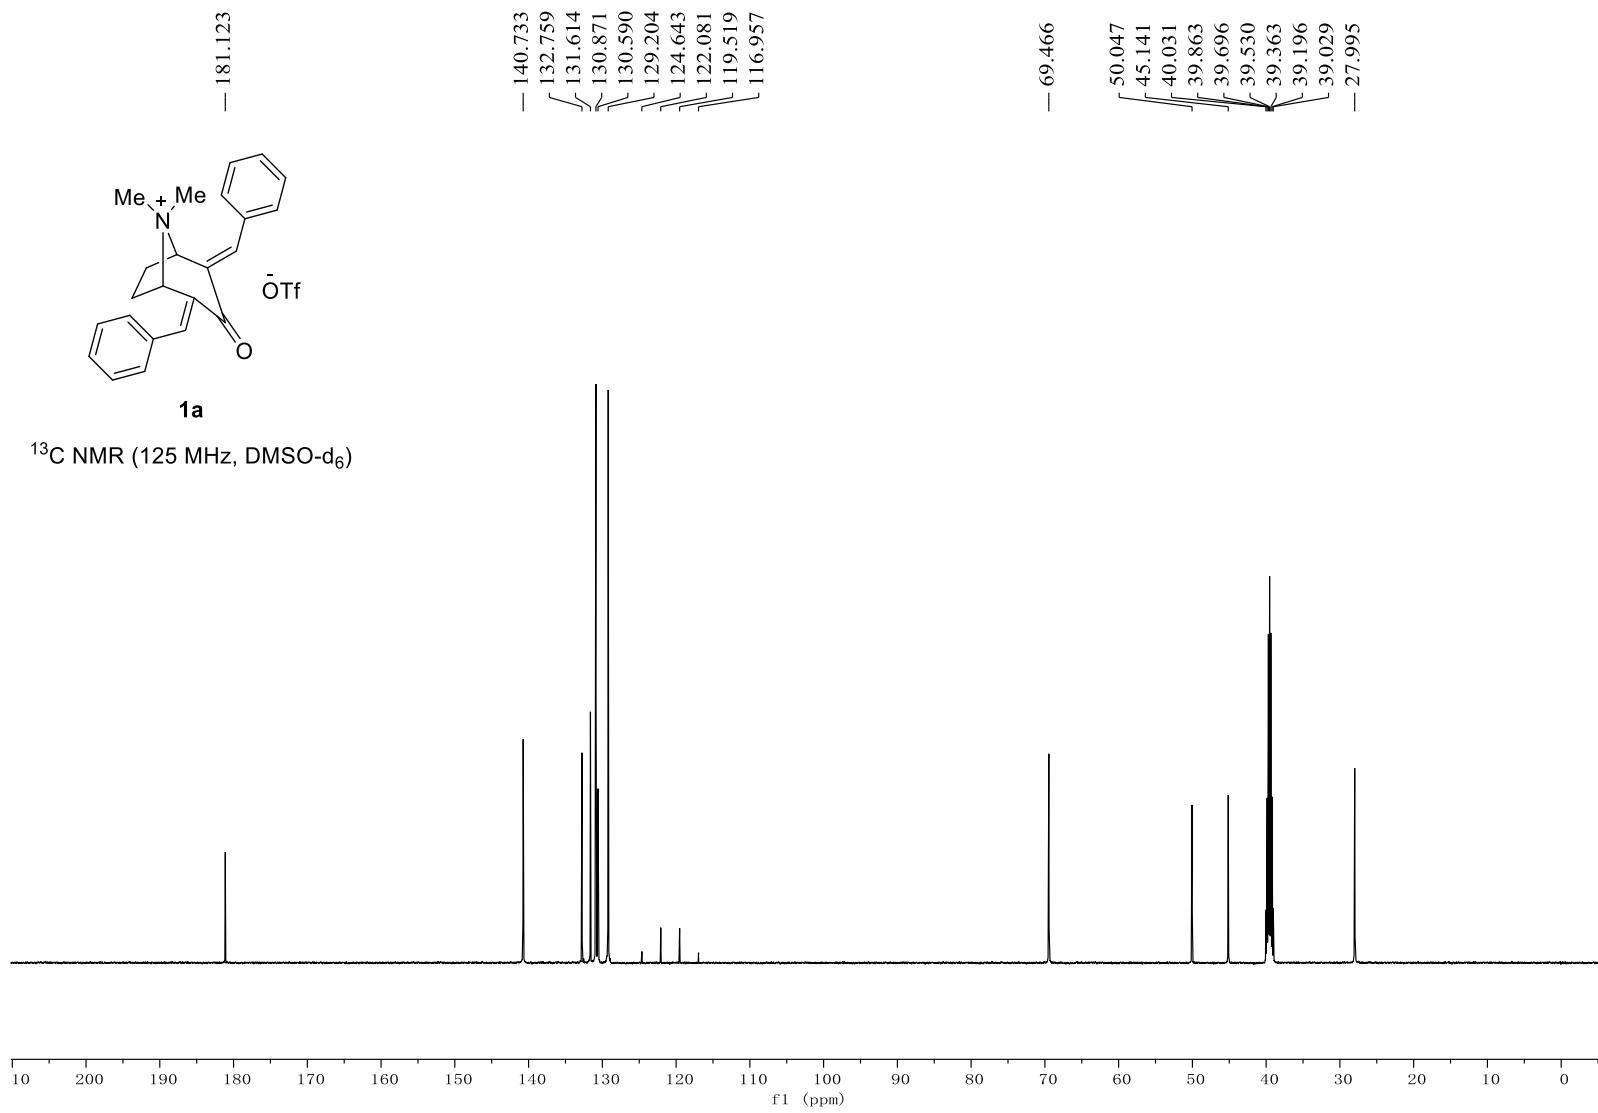



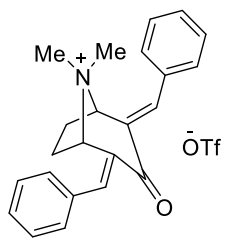

**1a**

$^{19}\text{F}$  NMR (471 MHz, DMSO- $d_6$ )

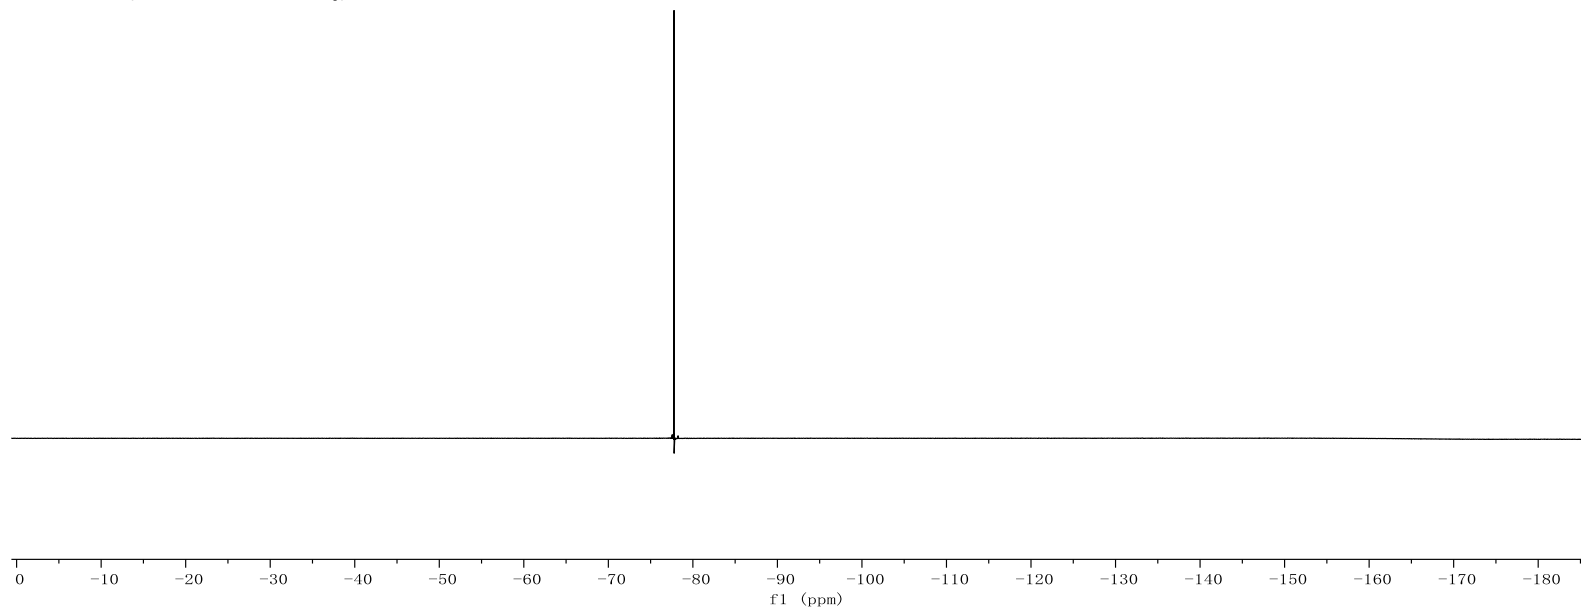

-77.772

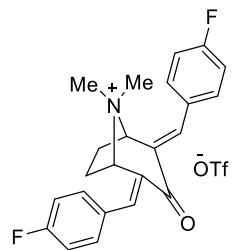

**1b**

<sup>1</sup>H NMR (500 MHz, DMSO-d<sub>6</sub>)

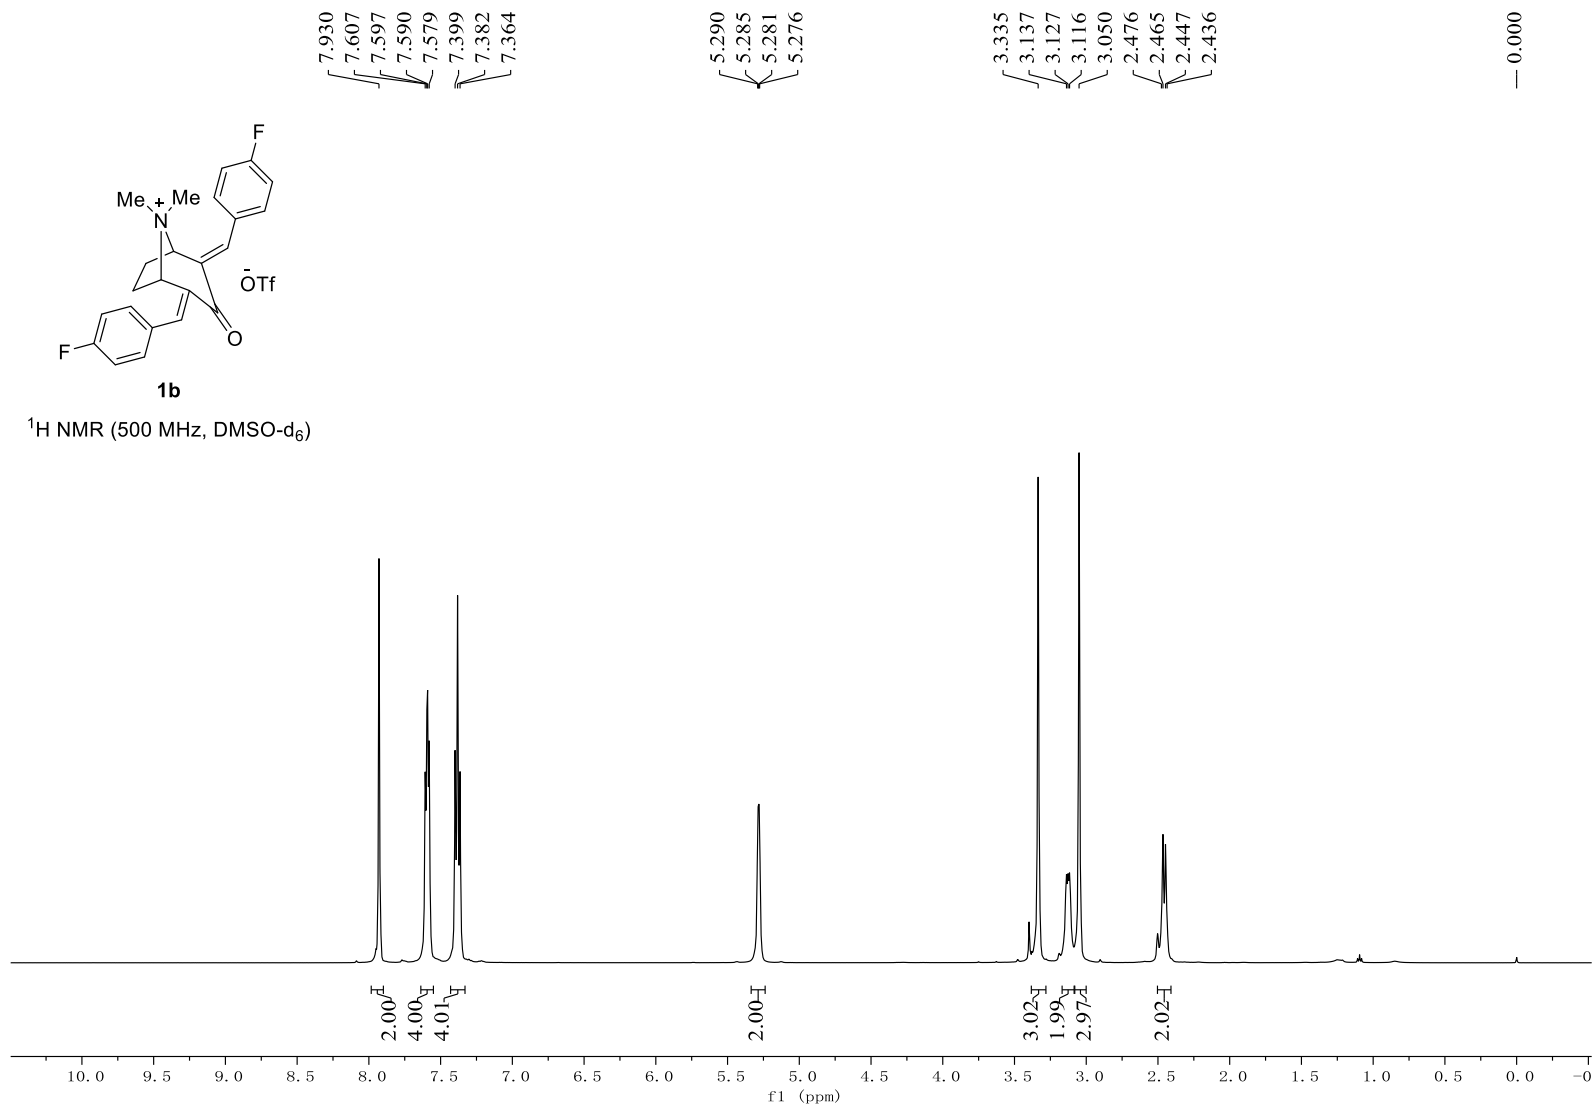

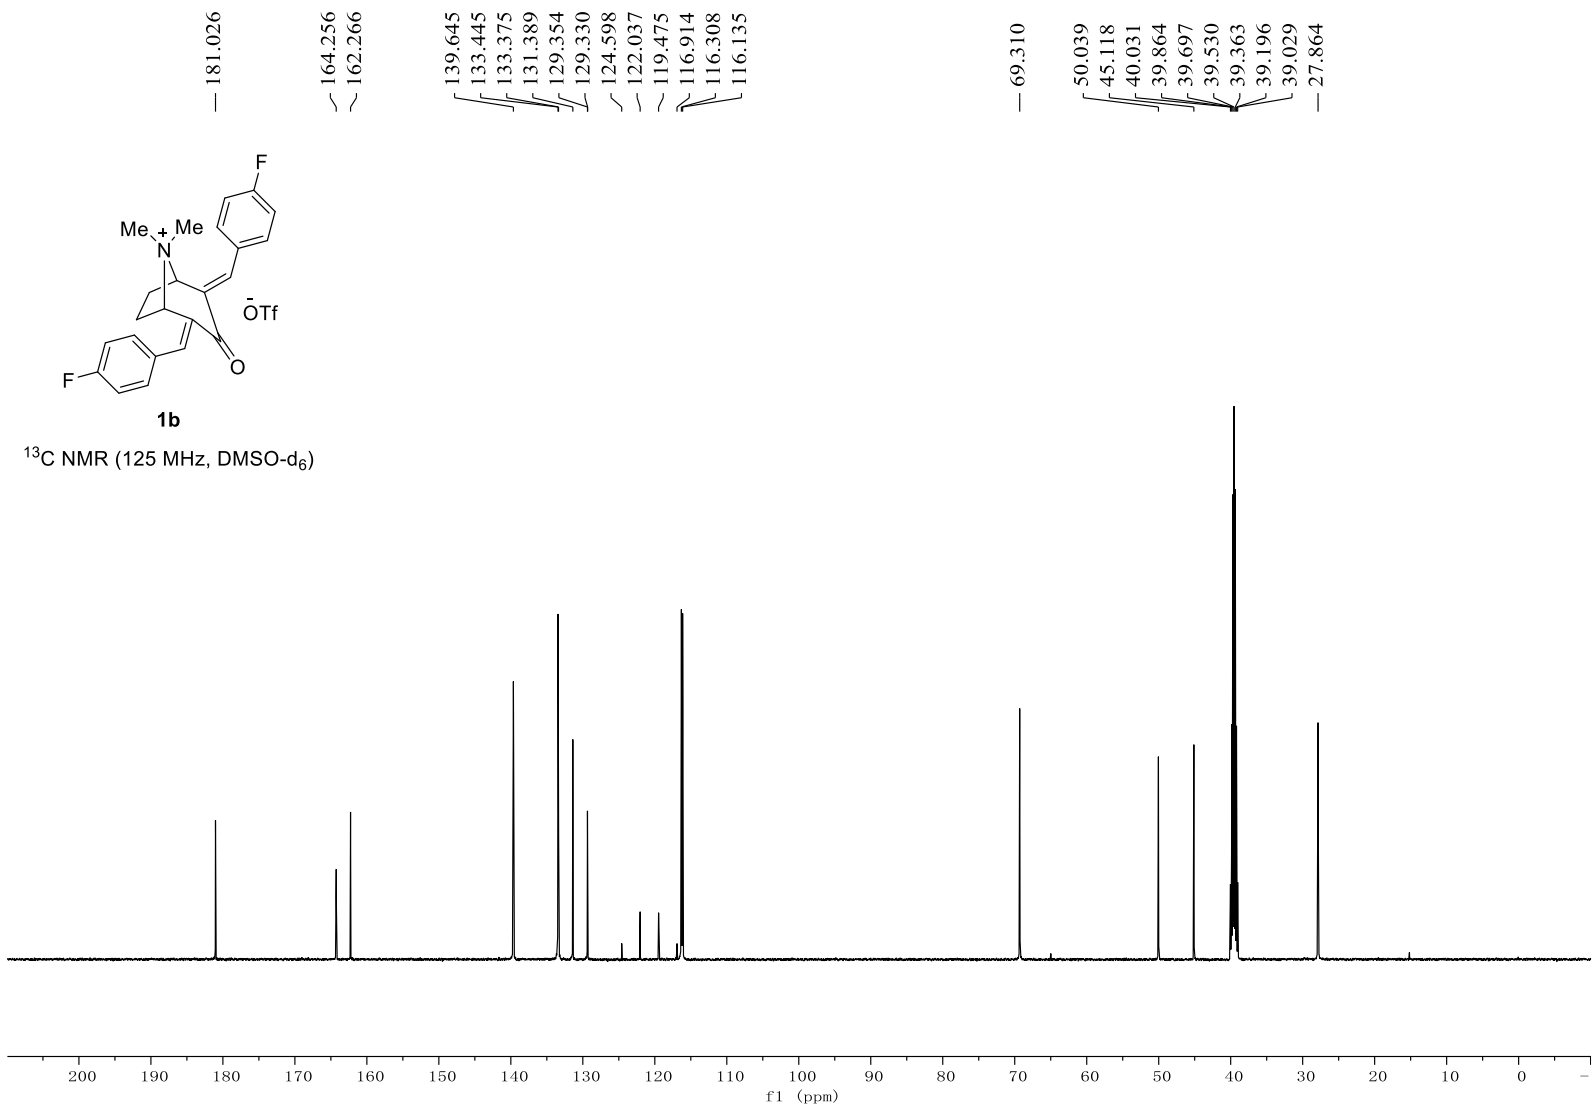

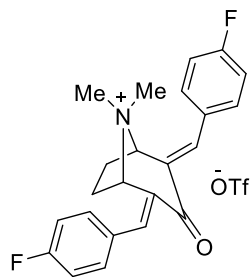

**1b**

$^{19}\text{F}$  NMR (471 MHz, DMSO- $d_6$ )

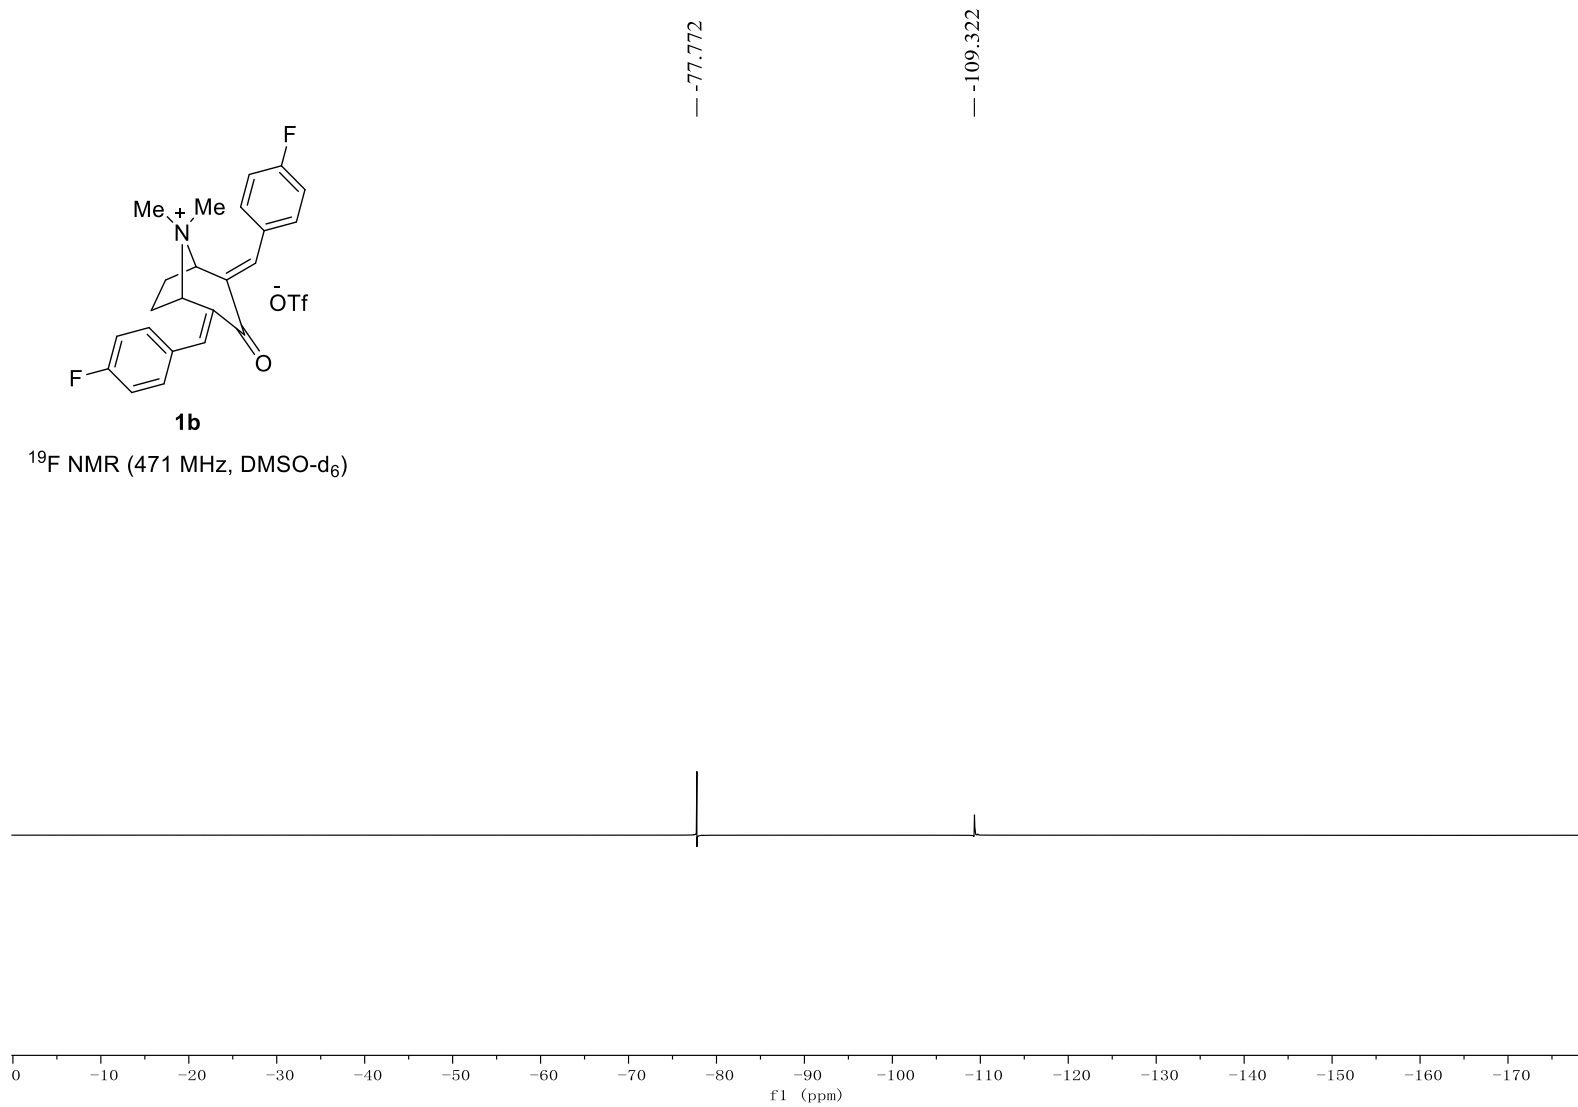

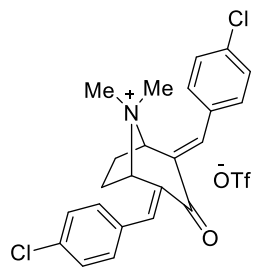

**1c**

<sup>1</sup>H NMR (500 MHz, DMSO-d<sub>6</sub>)

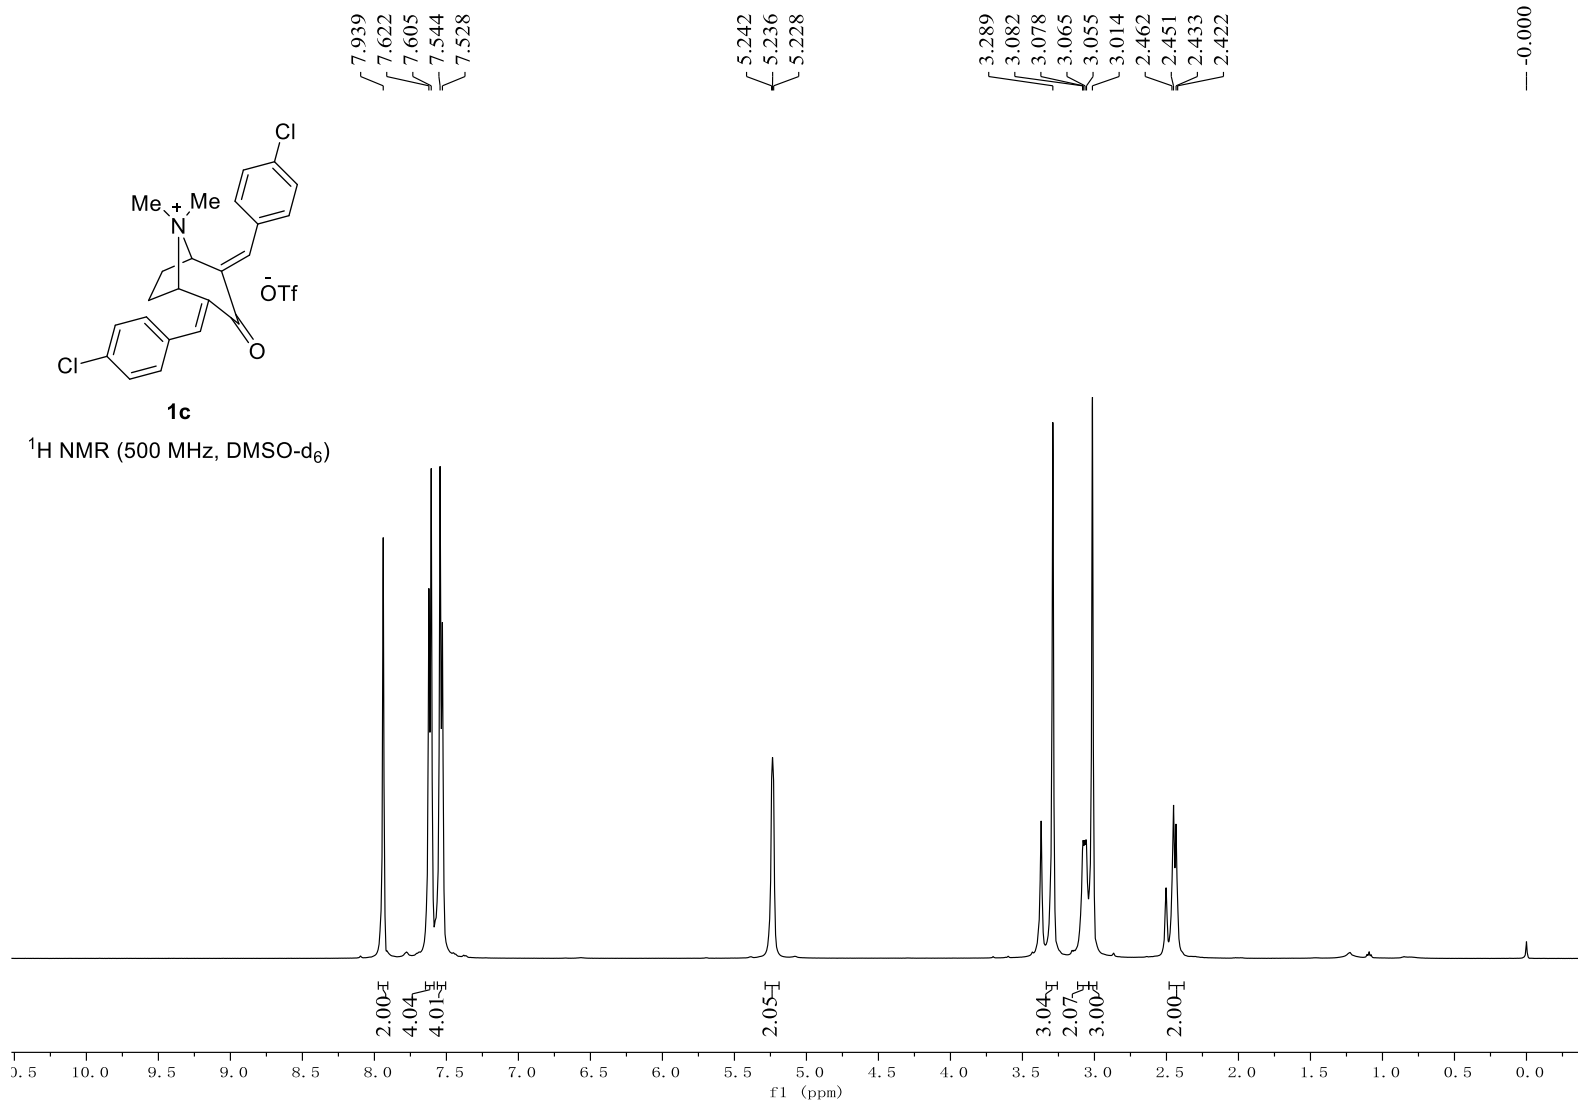

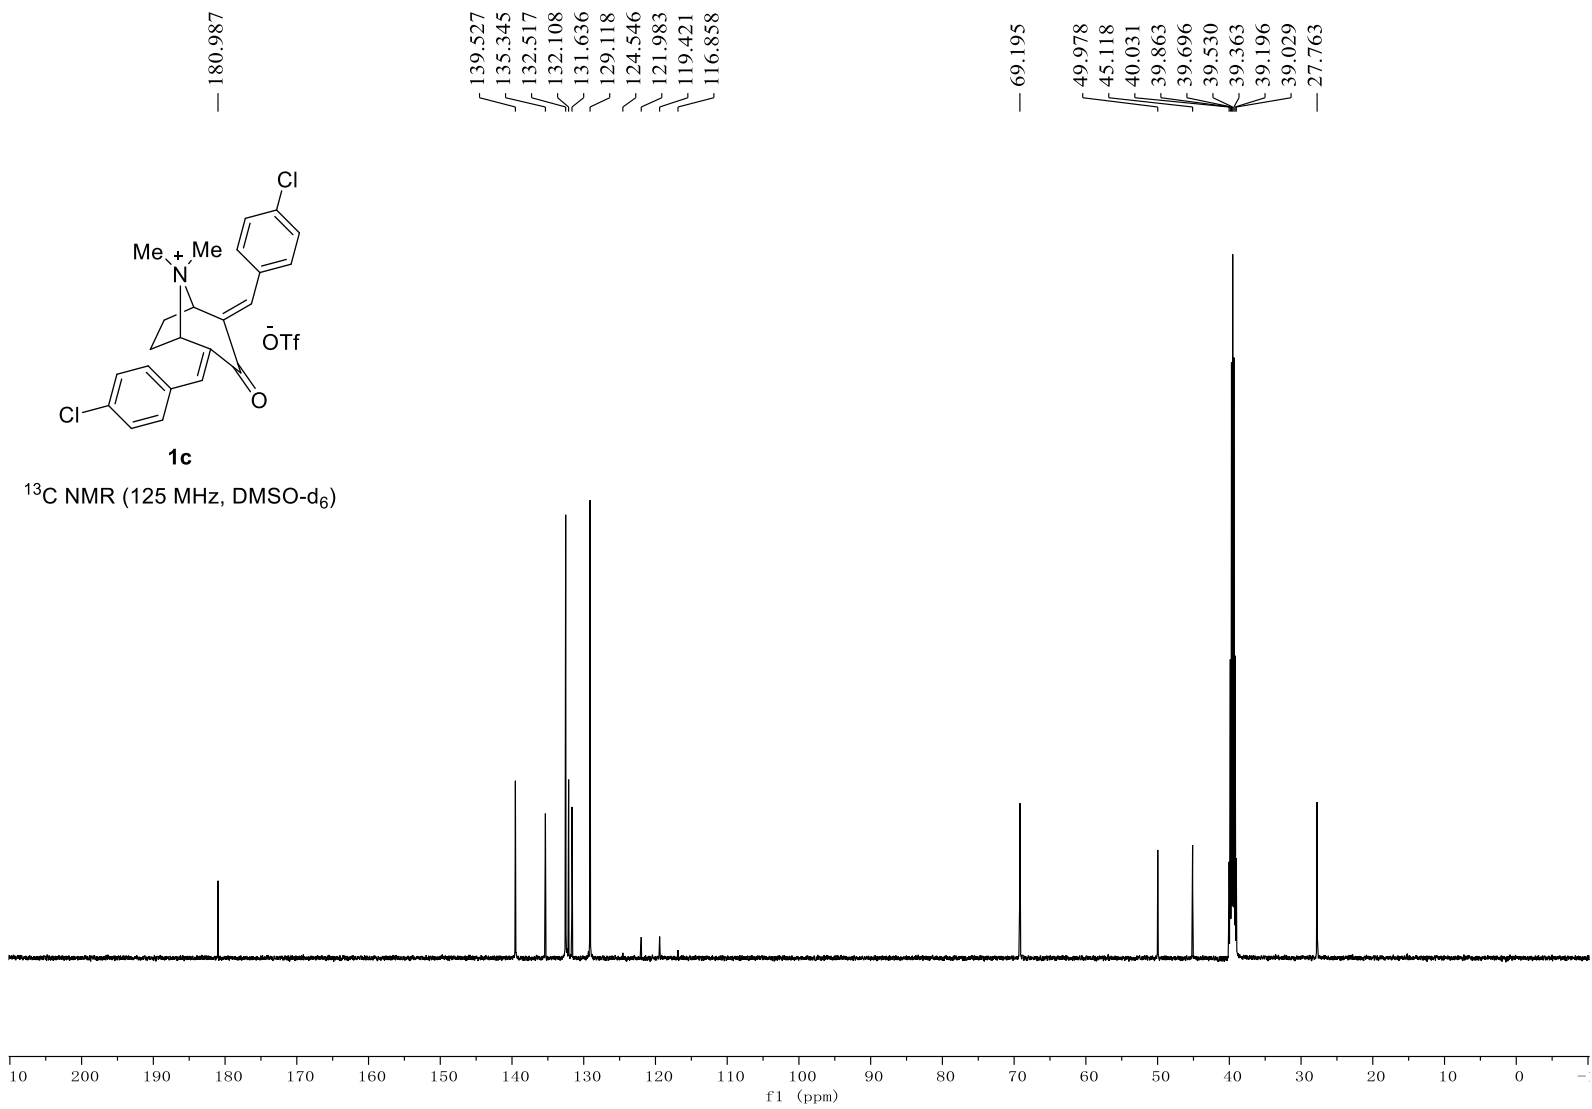

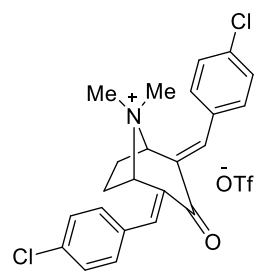

**1c**

<sup>19</sup>F NMR (471 MHz, DMSO-d<sub>6</sub>)

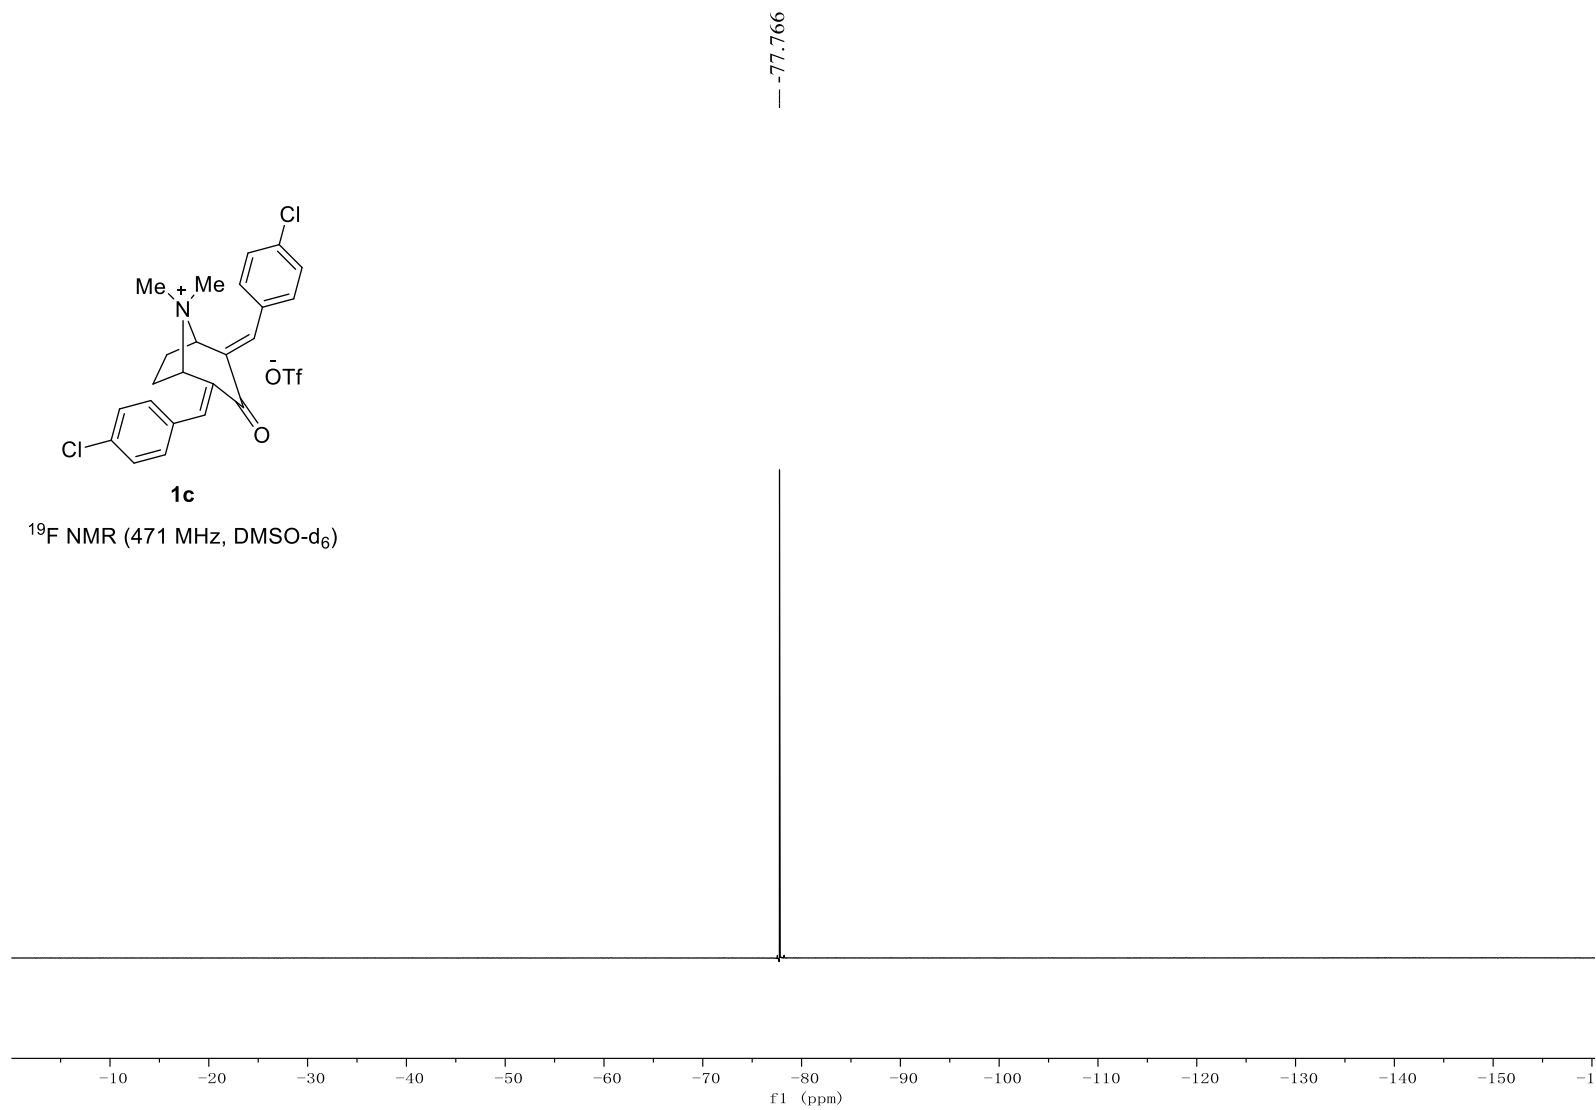

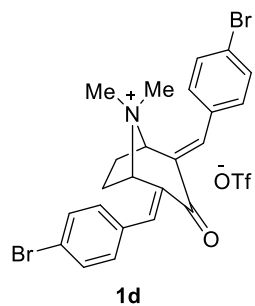

<sup>1</sup>H NMR (500 MHz, DMSO-d<sub>6</sub>)

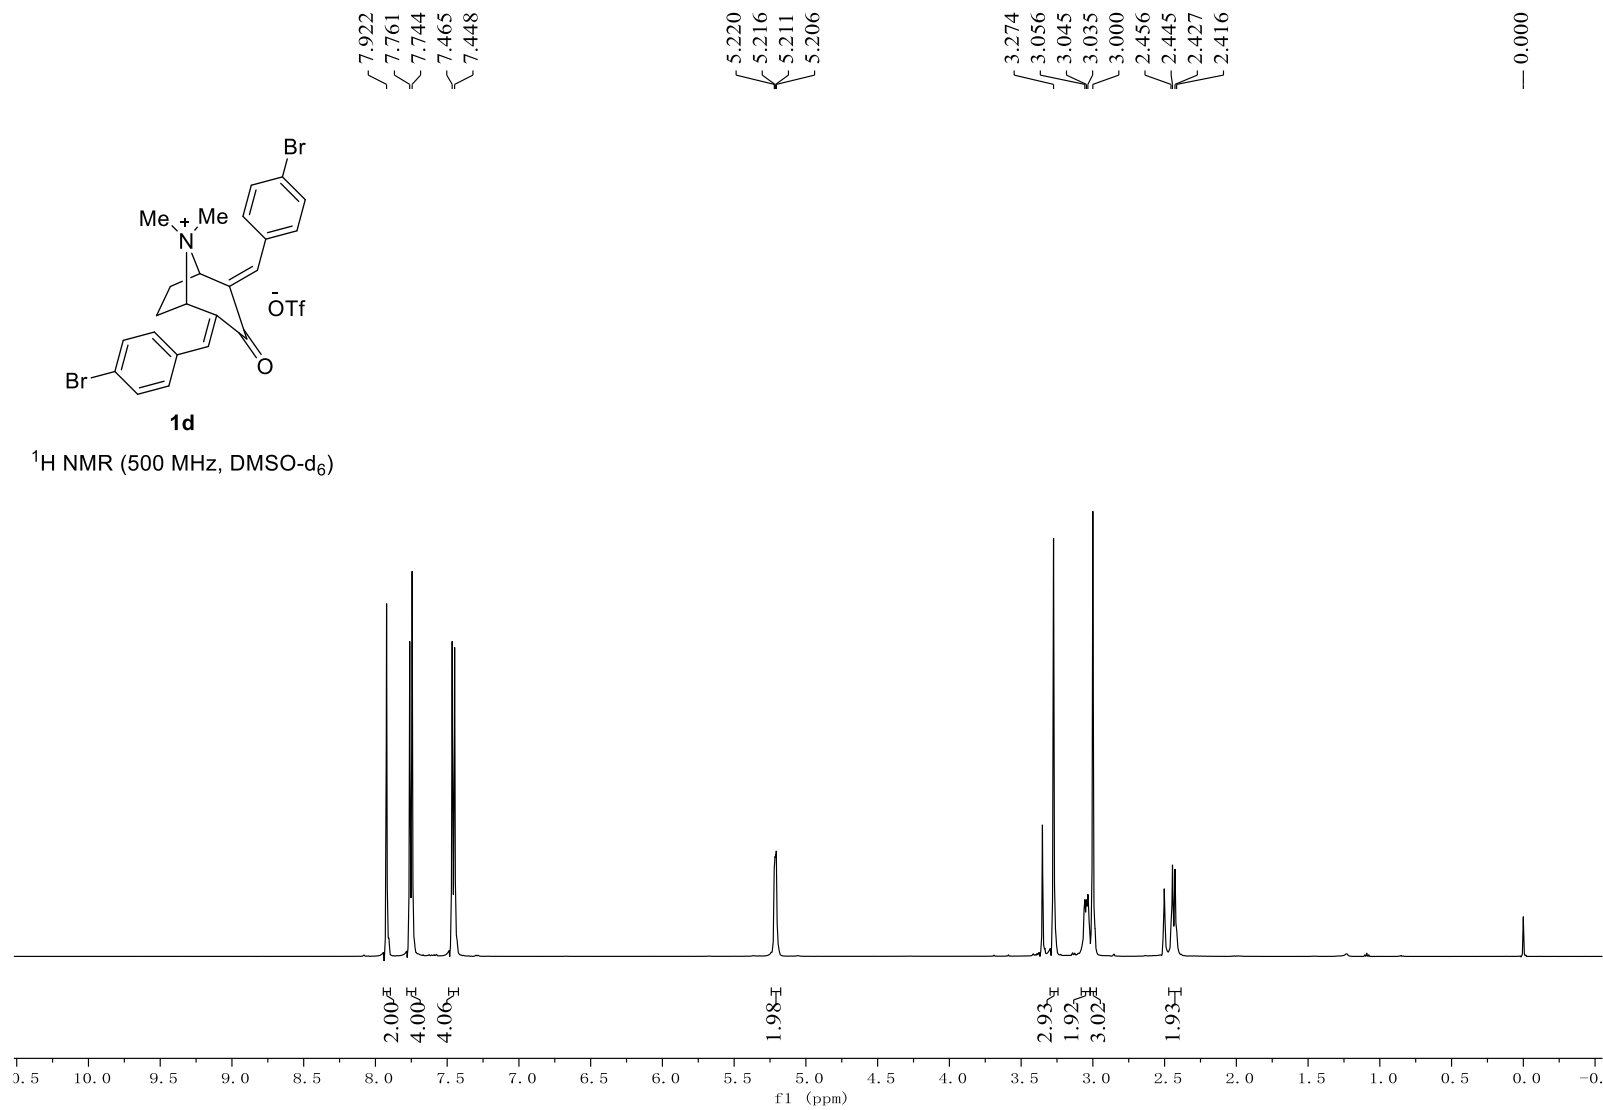



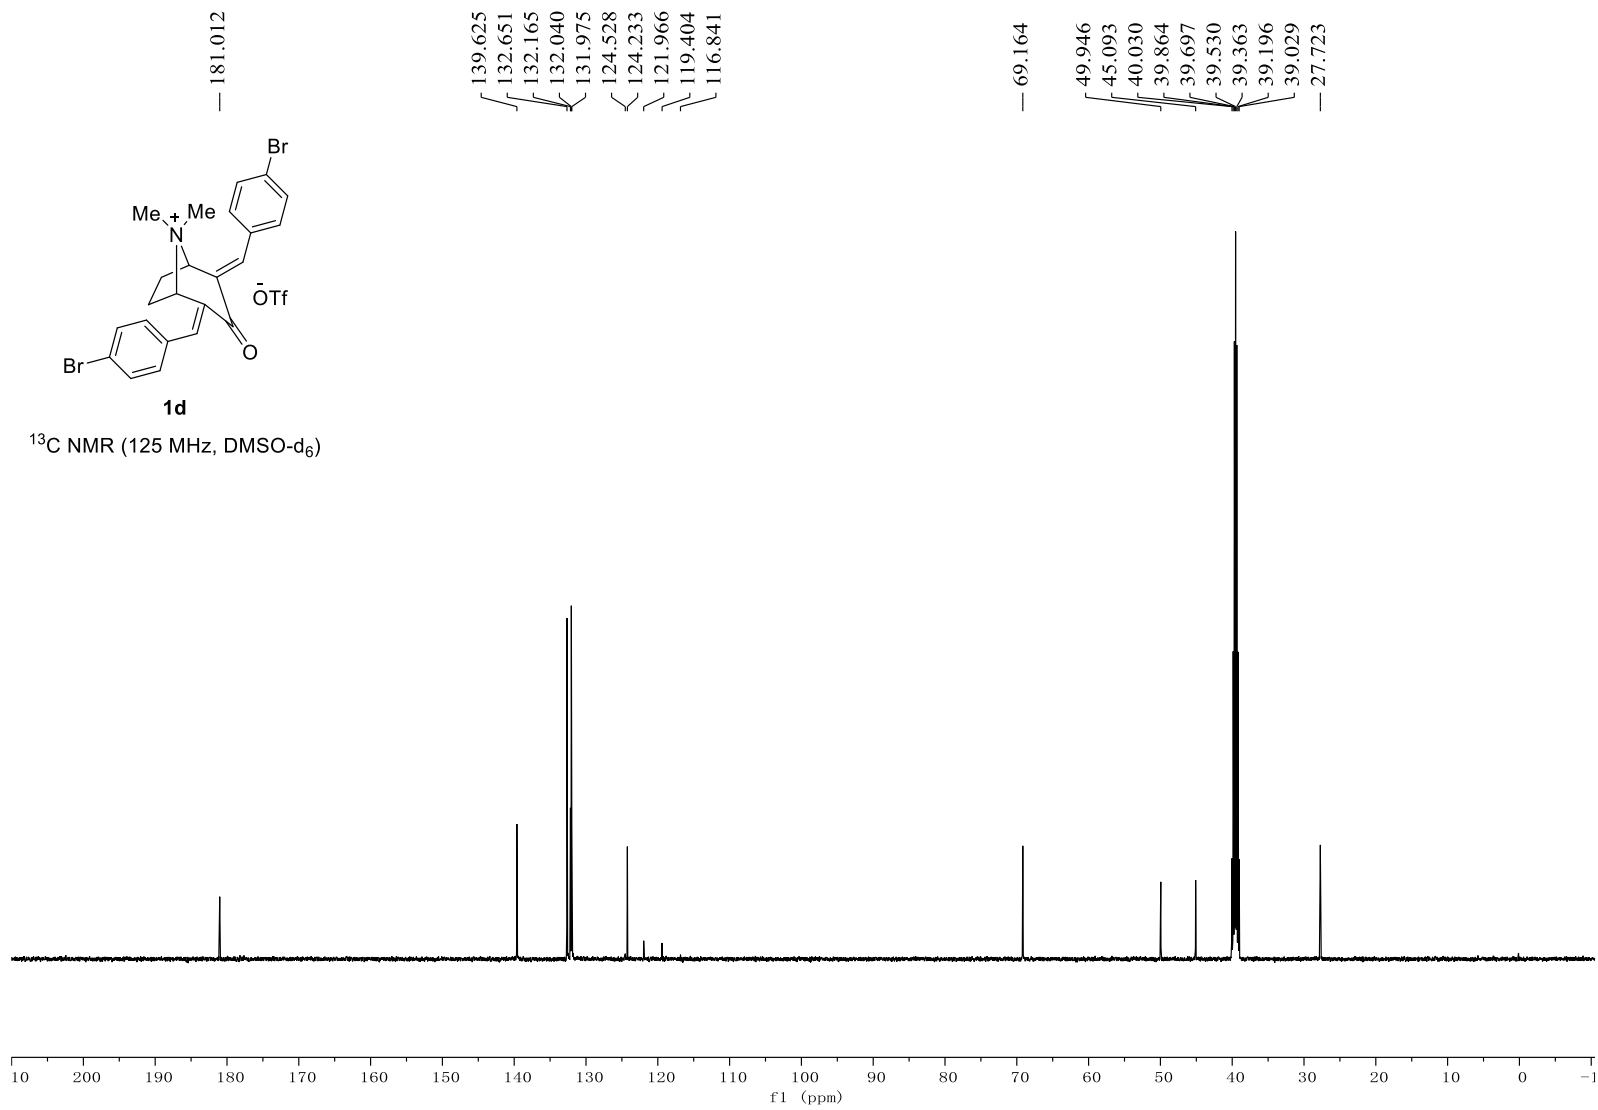

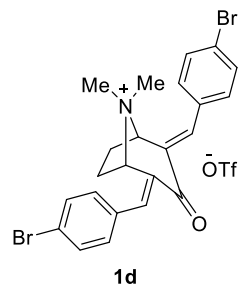

$^{19}\text{F}$  NMR (471 MHz, DMSO- $d_6$ )

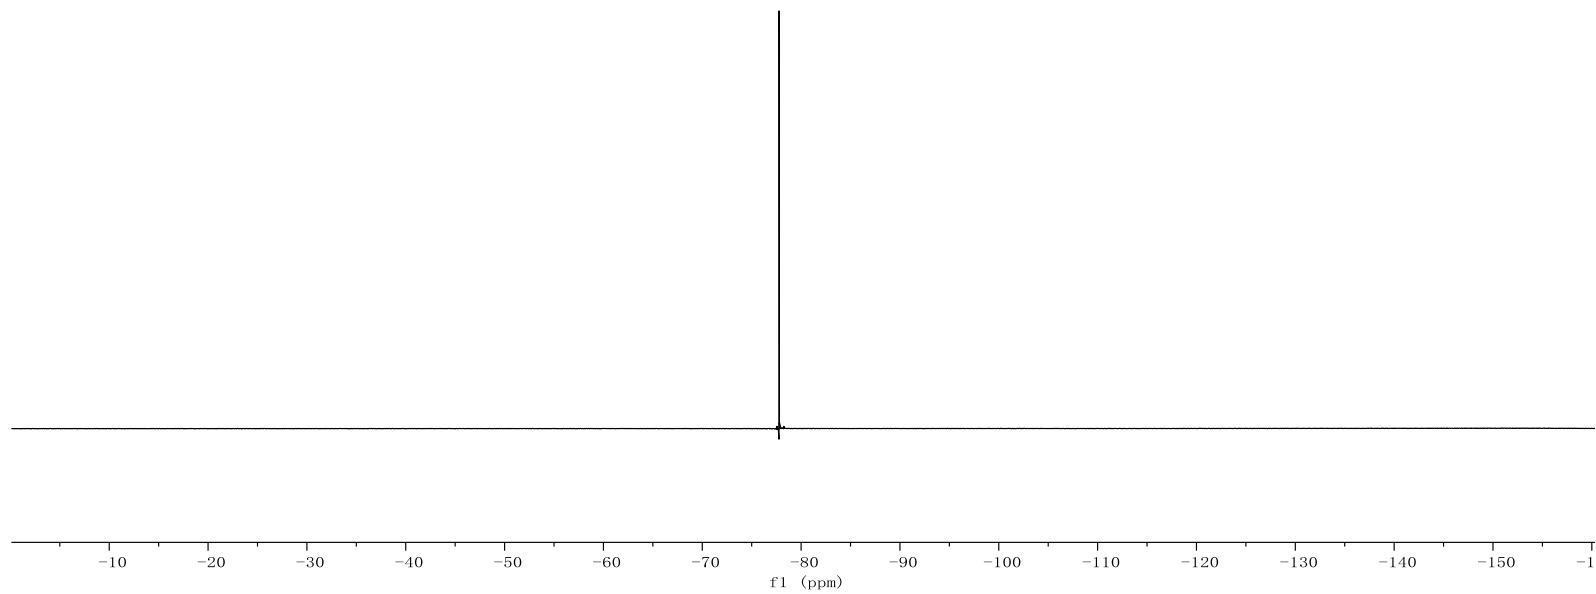

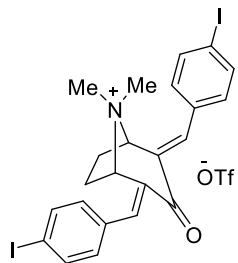

**1e**

<sup>1</sup>H NMR (400 MHz, DMSO-d<sub>6</sub>)

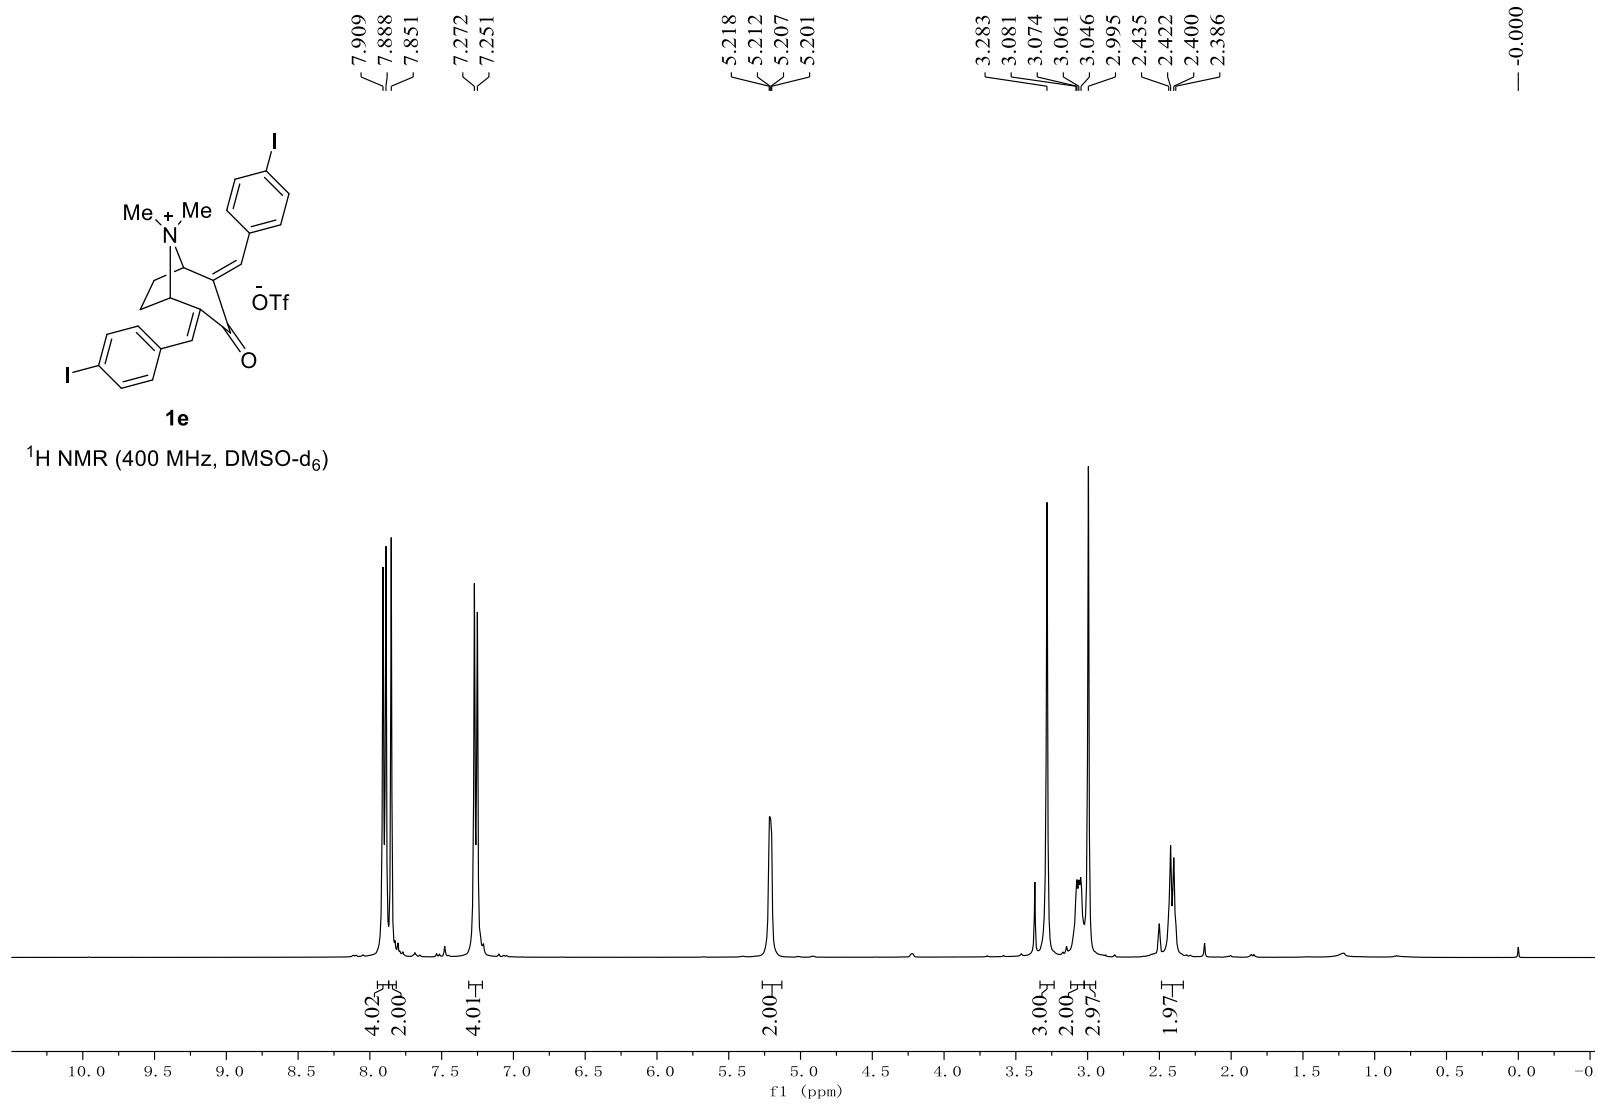

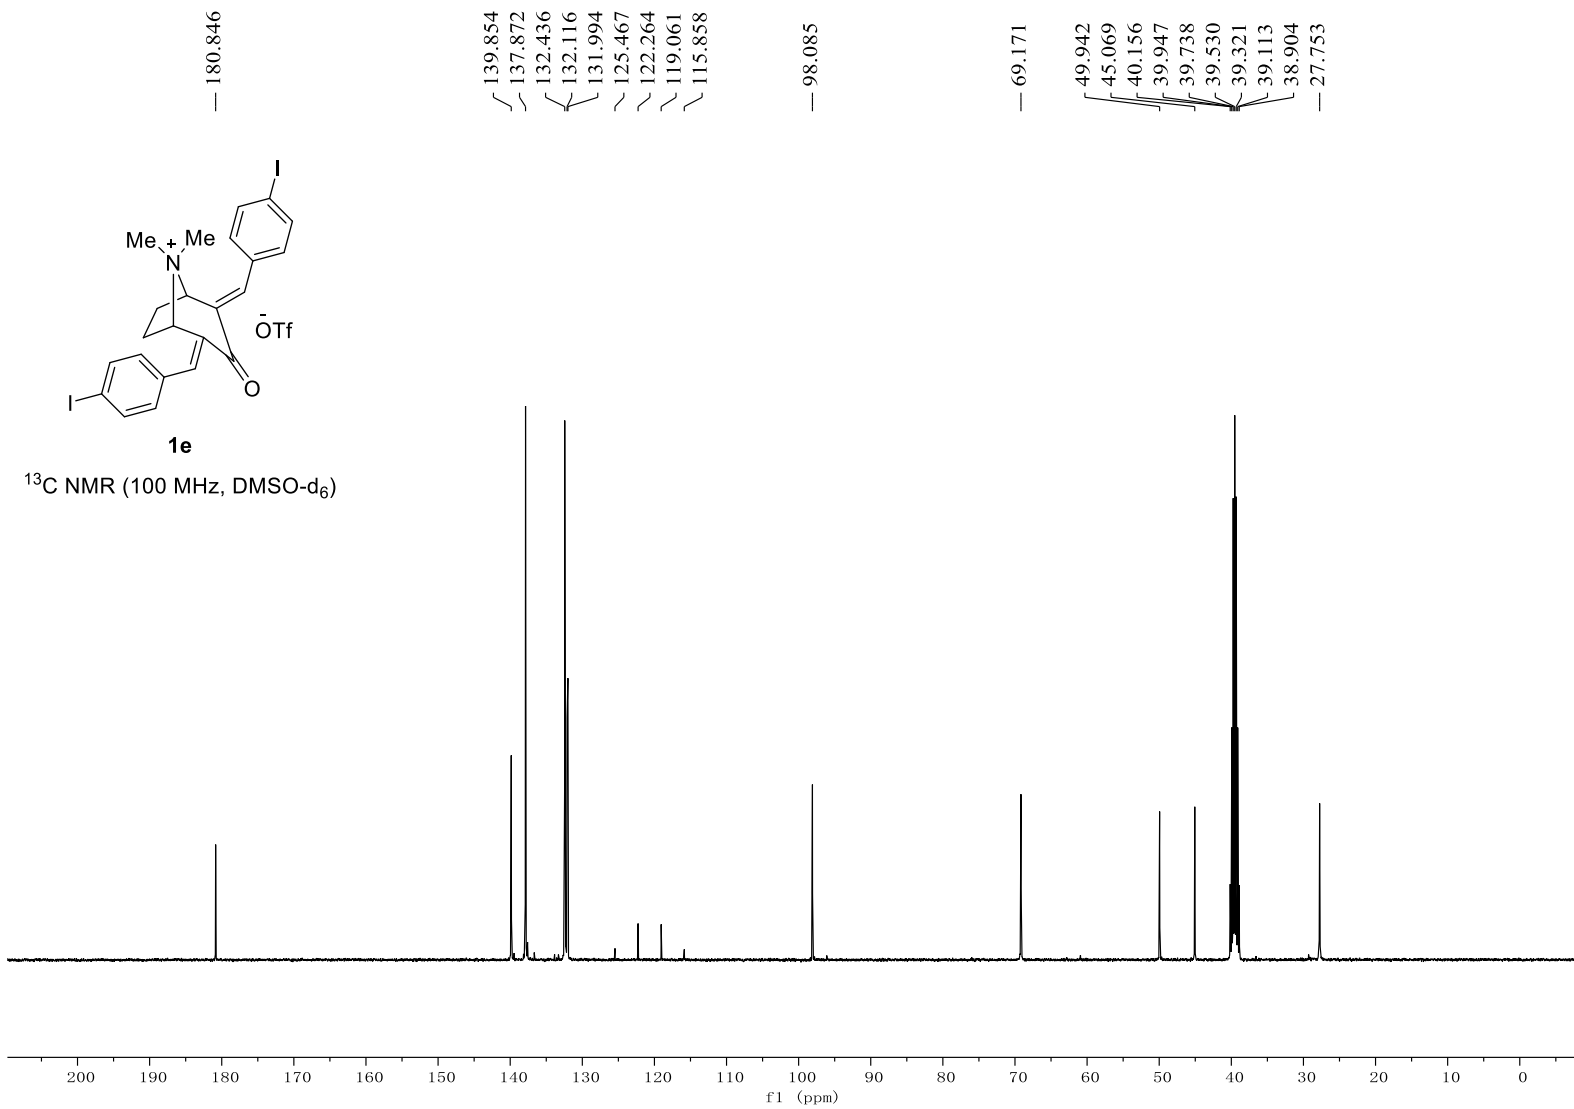

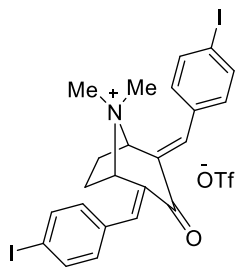

**1e**

$^{19}\text{F}$  NMR (376 MHz,  $\text{DMSO-d}_6$ )

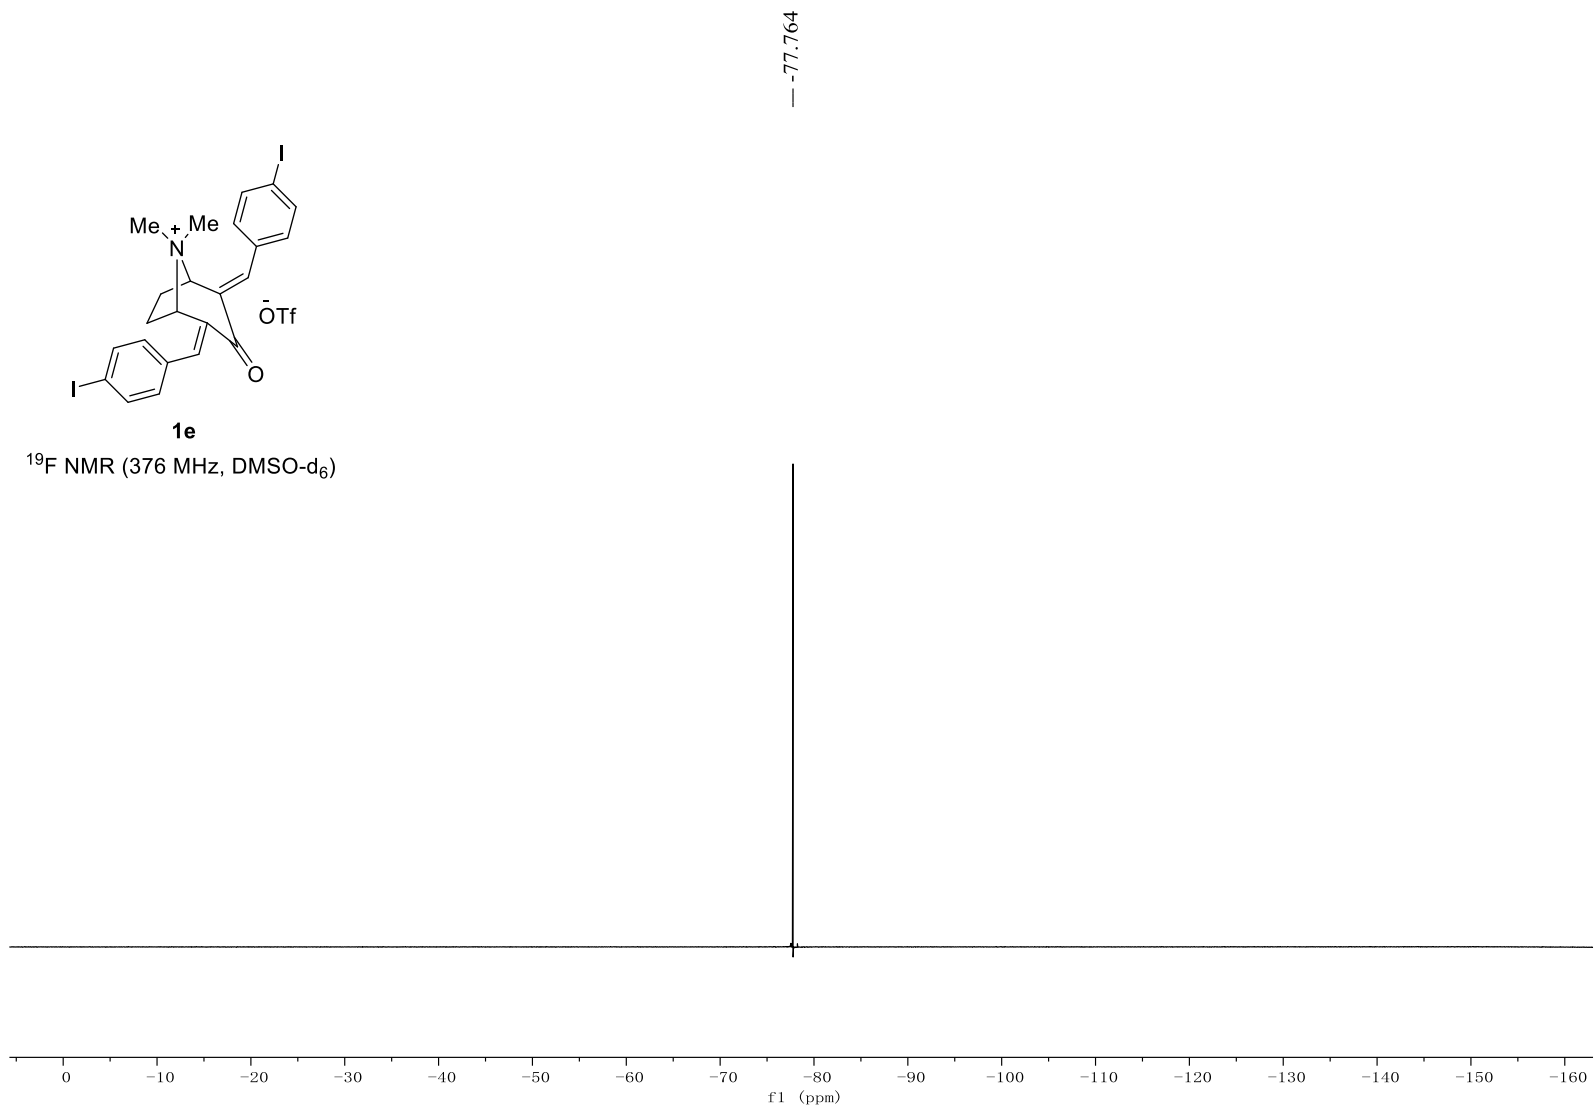

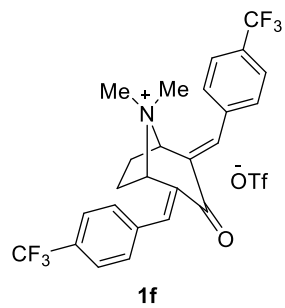

<sup>1</sup>H NMR (400 MHz, DMSO-d<sub>6</sub>)

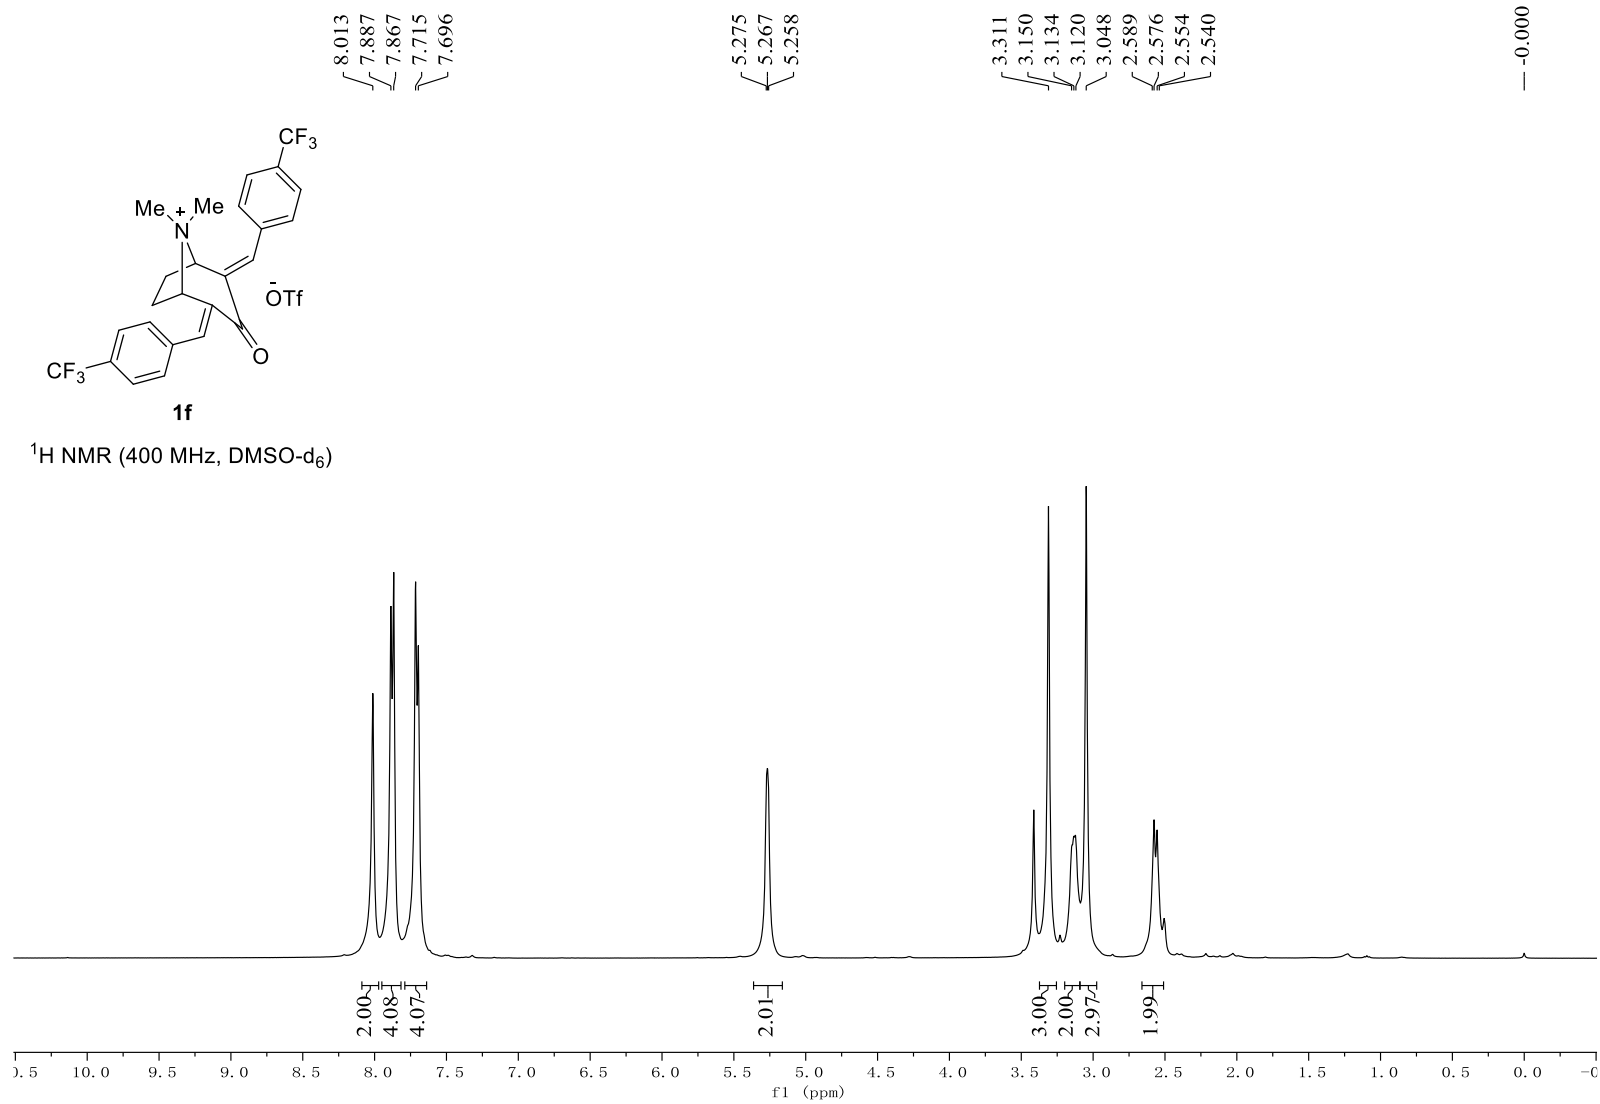

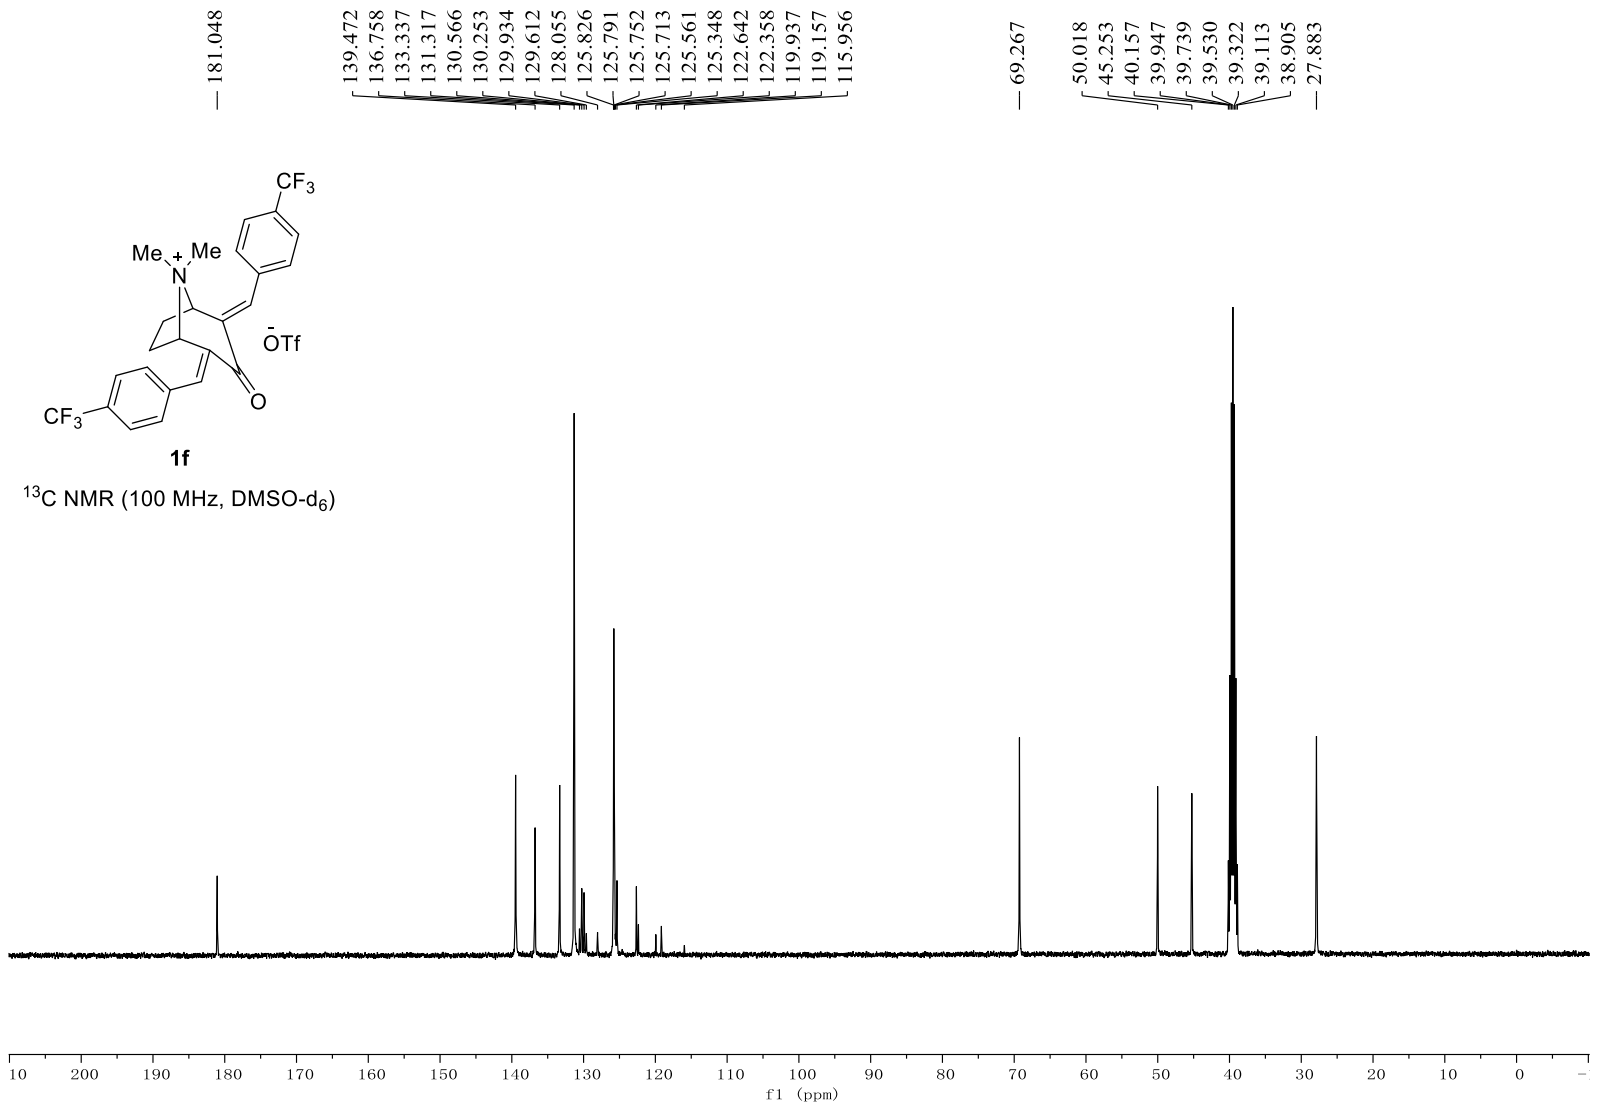

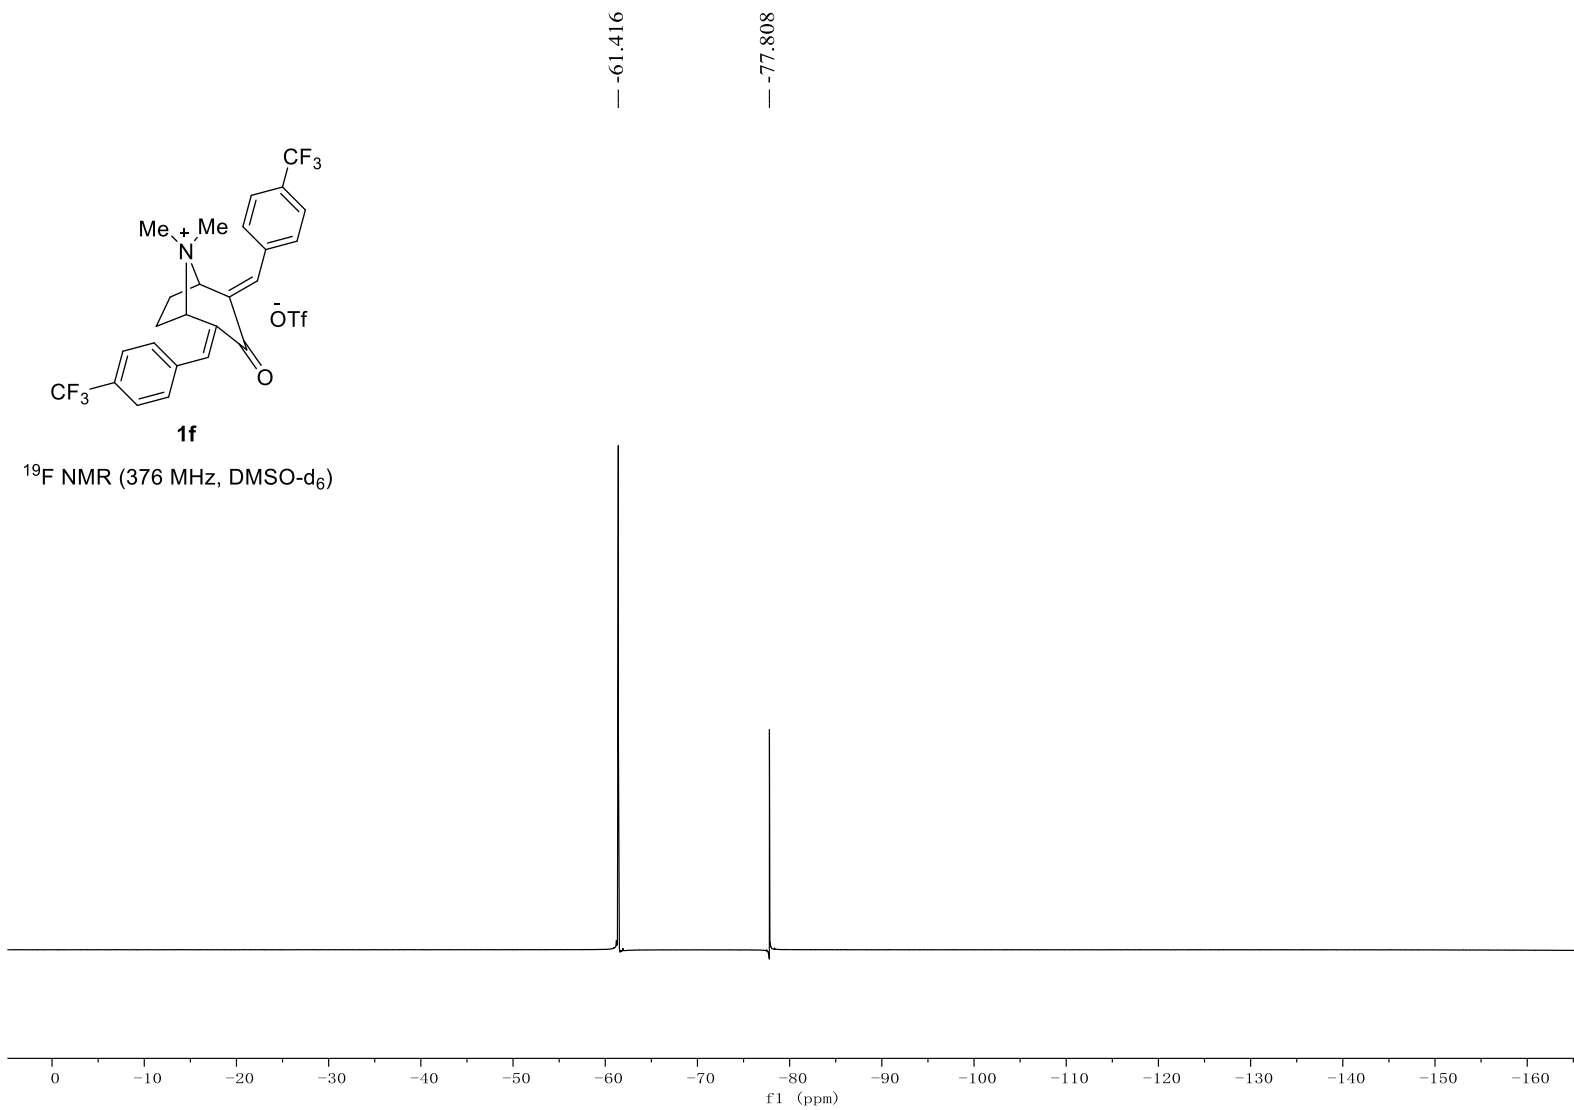



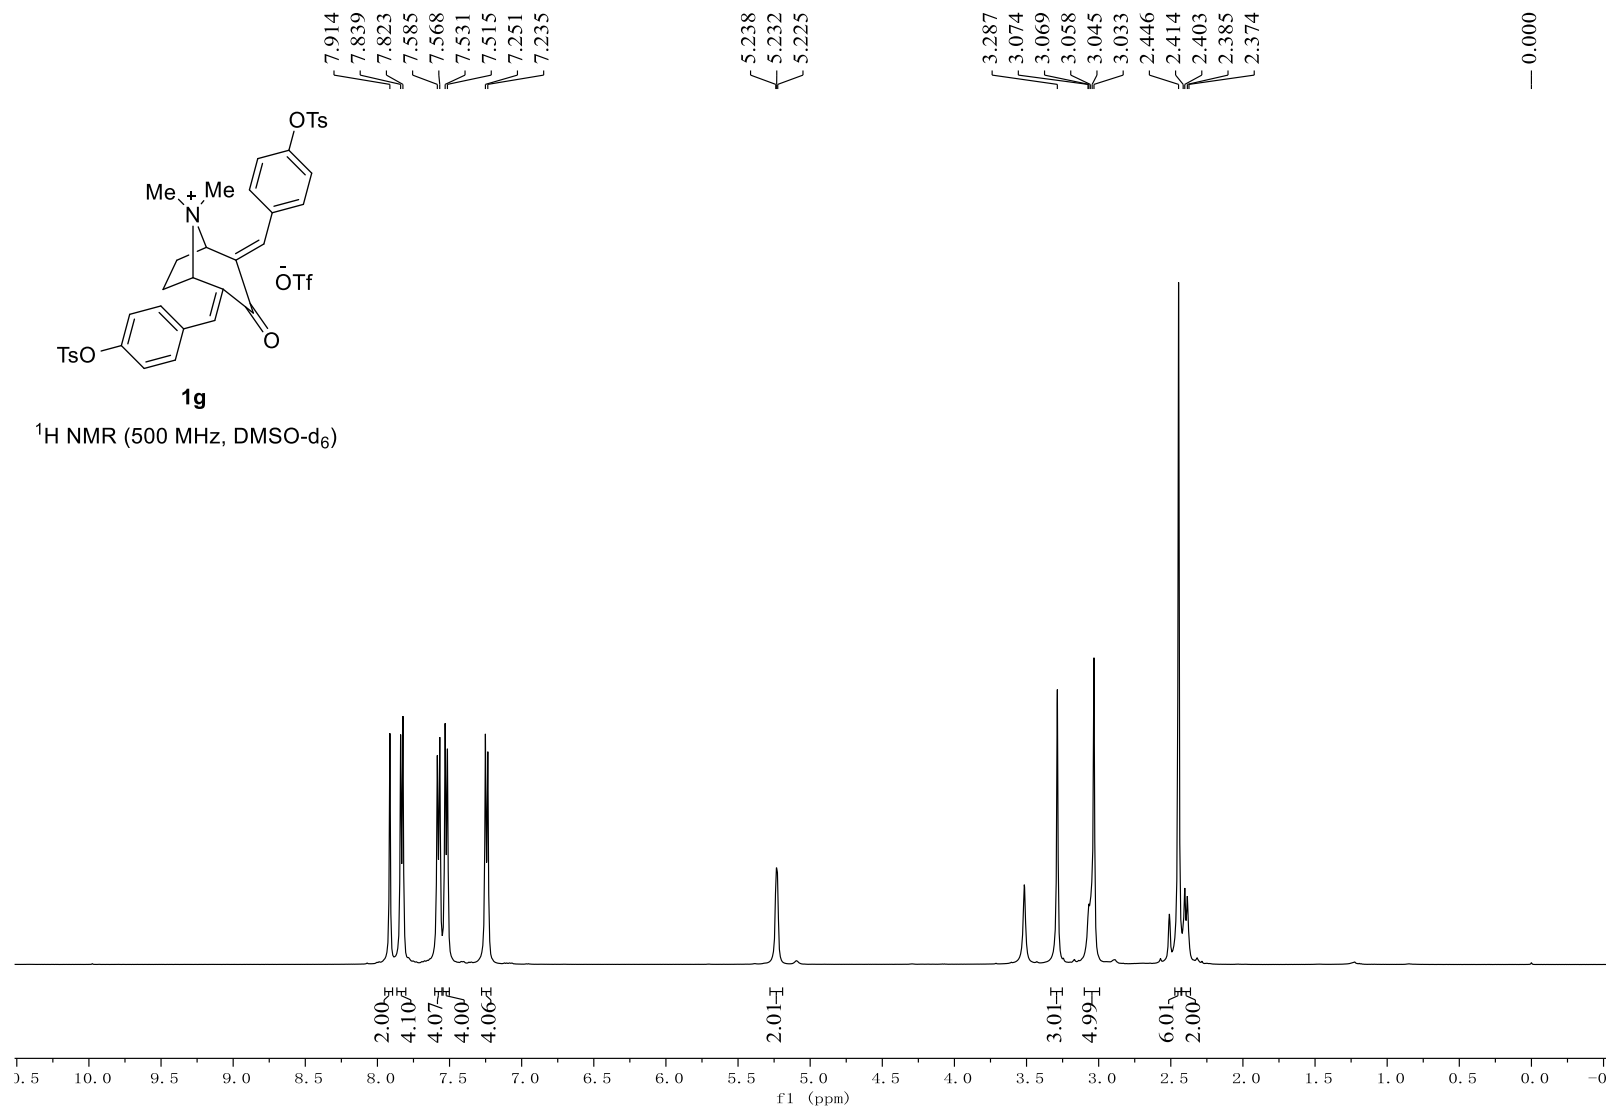

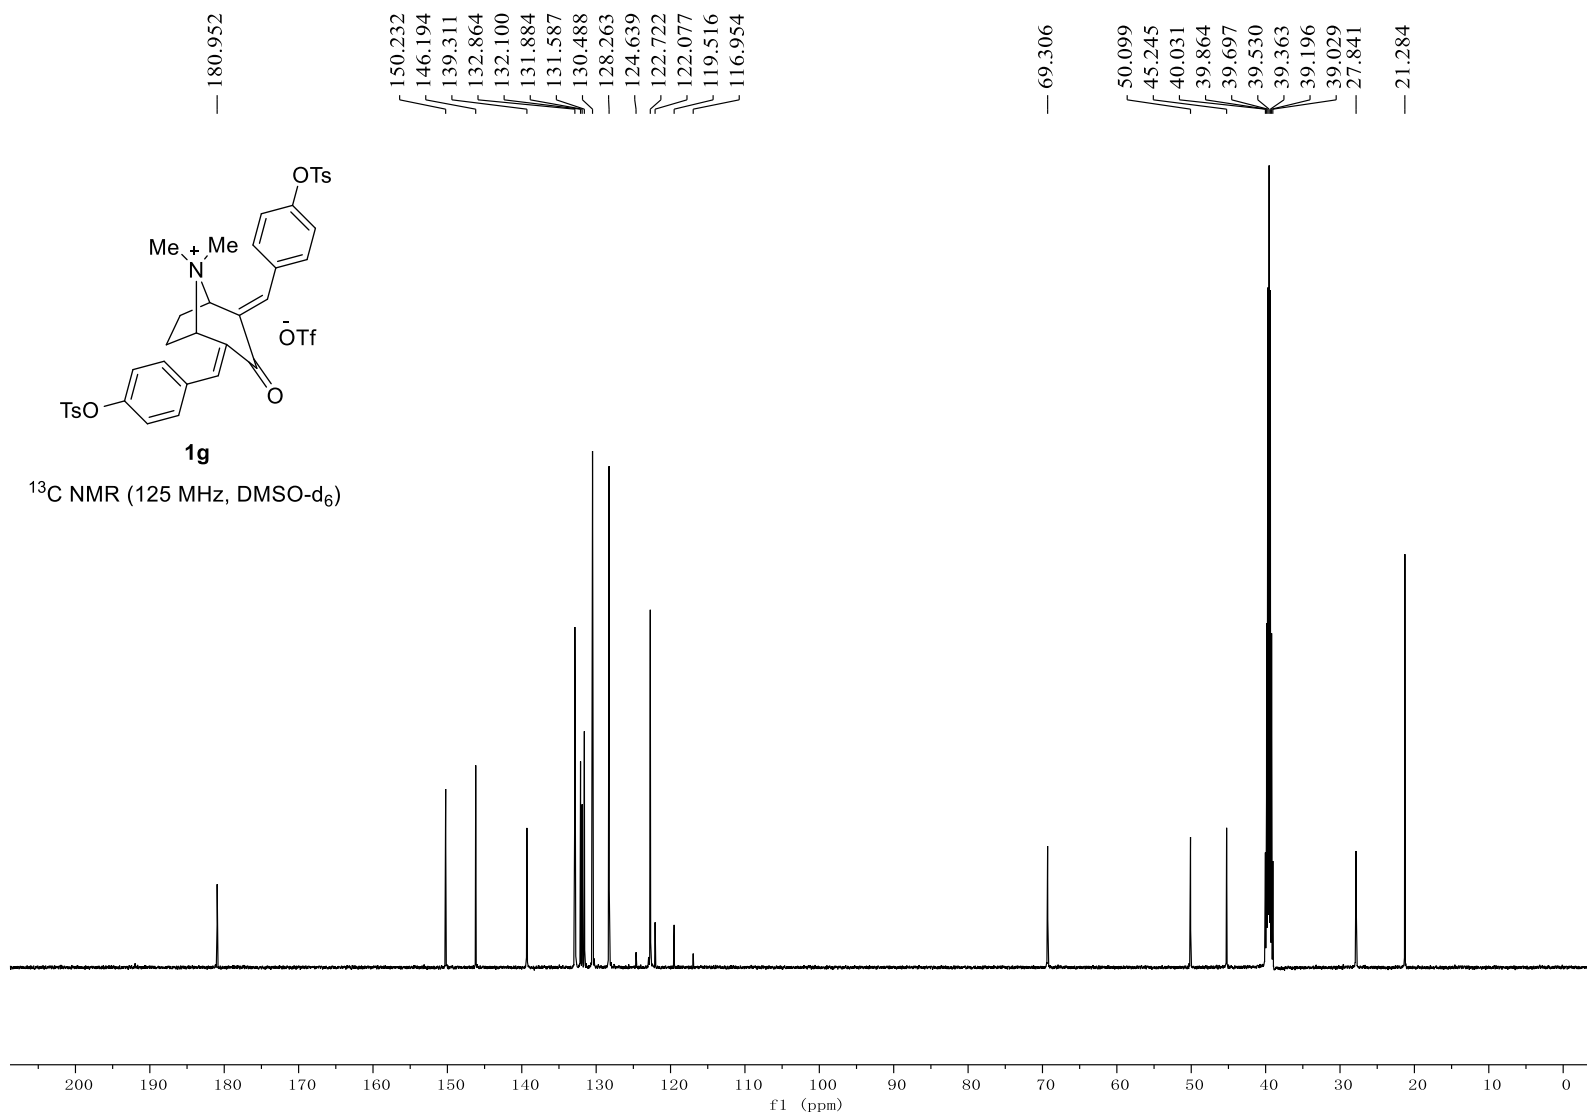



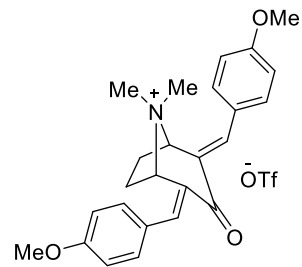

**1h**

$^1\text{H NMR}$  (400 MHz,  $\text{DMSO-d}_6$ )

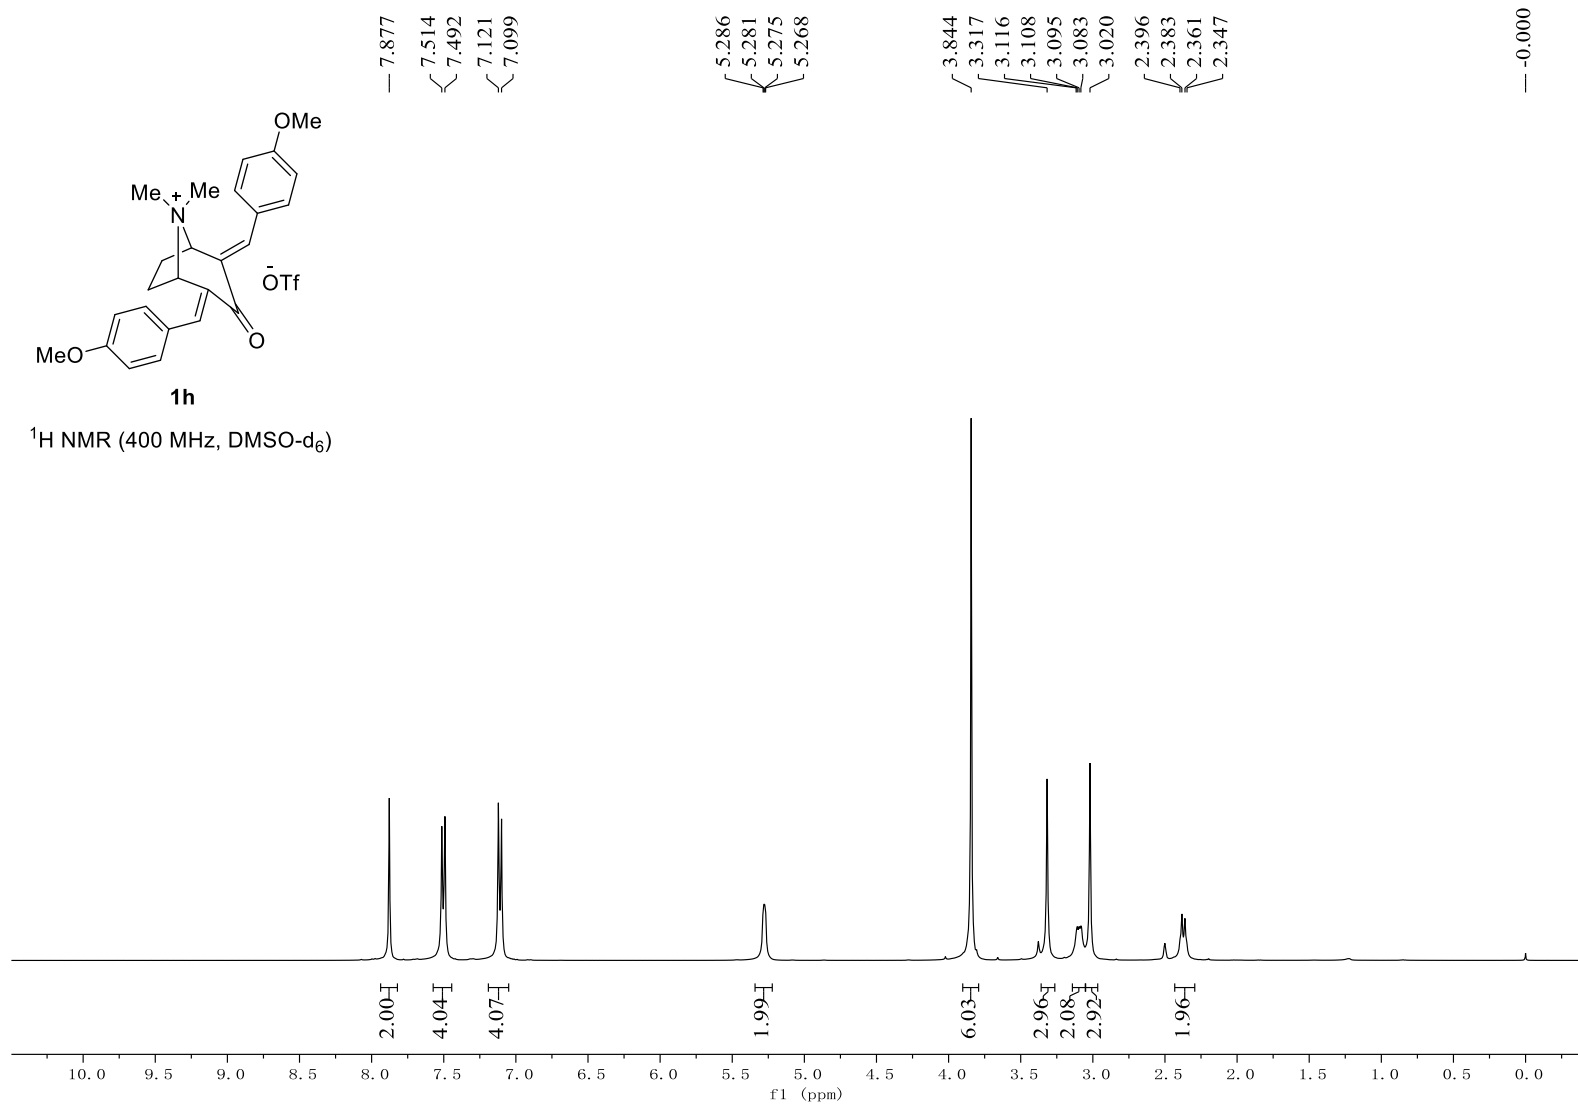

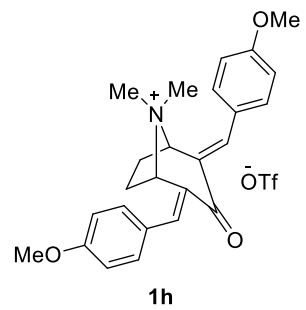

<sup>13</sup>C NMR (100 MHz, DMSO-d<sub>6</sub>)

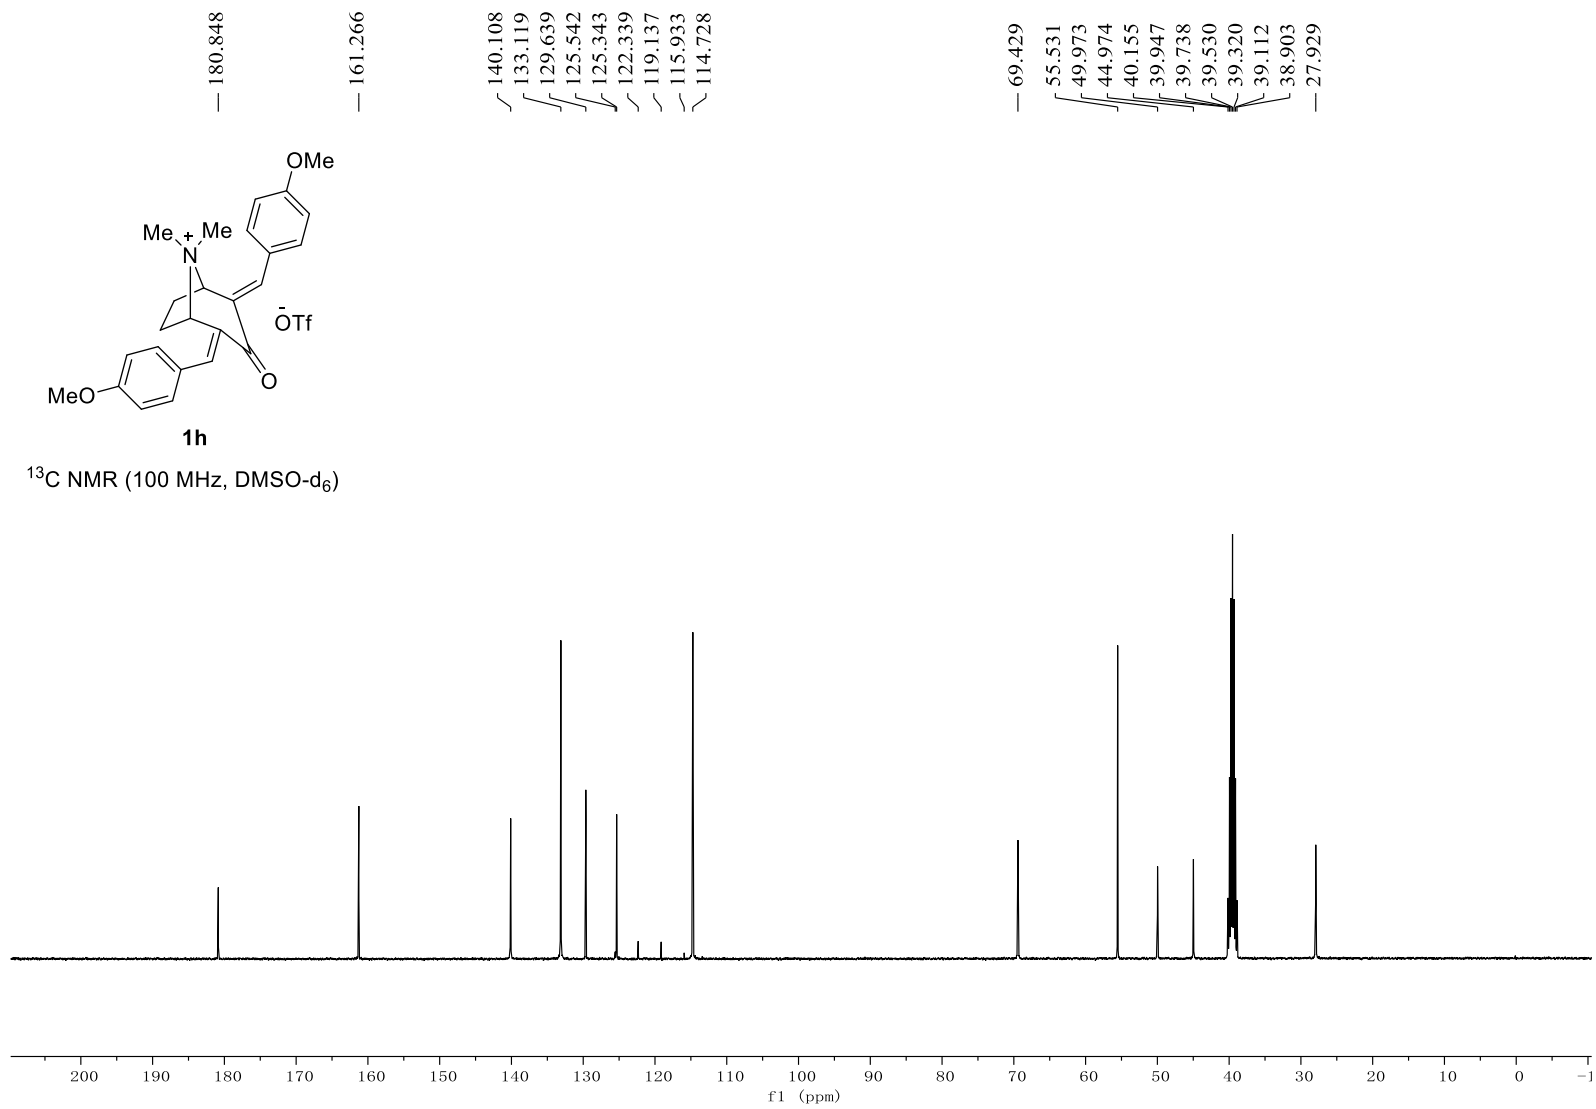

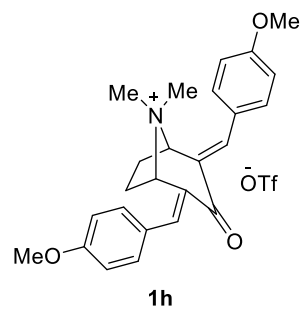

<sup>19</sup>F NMR (376 MHz, DMSO-d<sub>6</sub>)

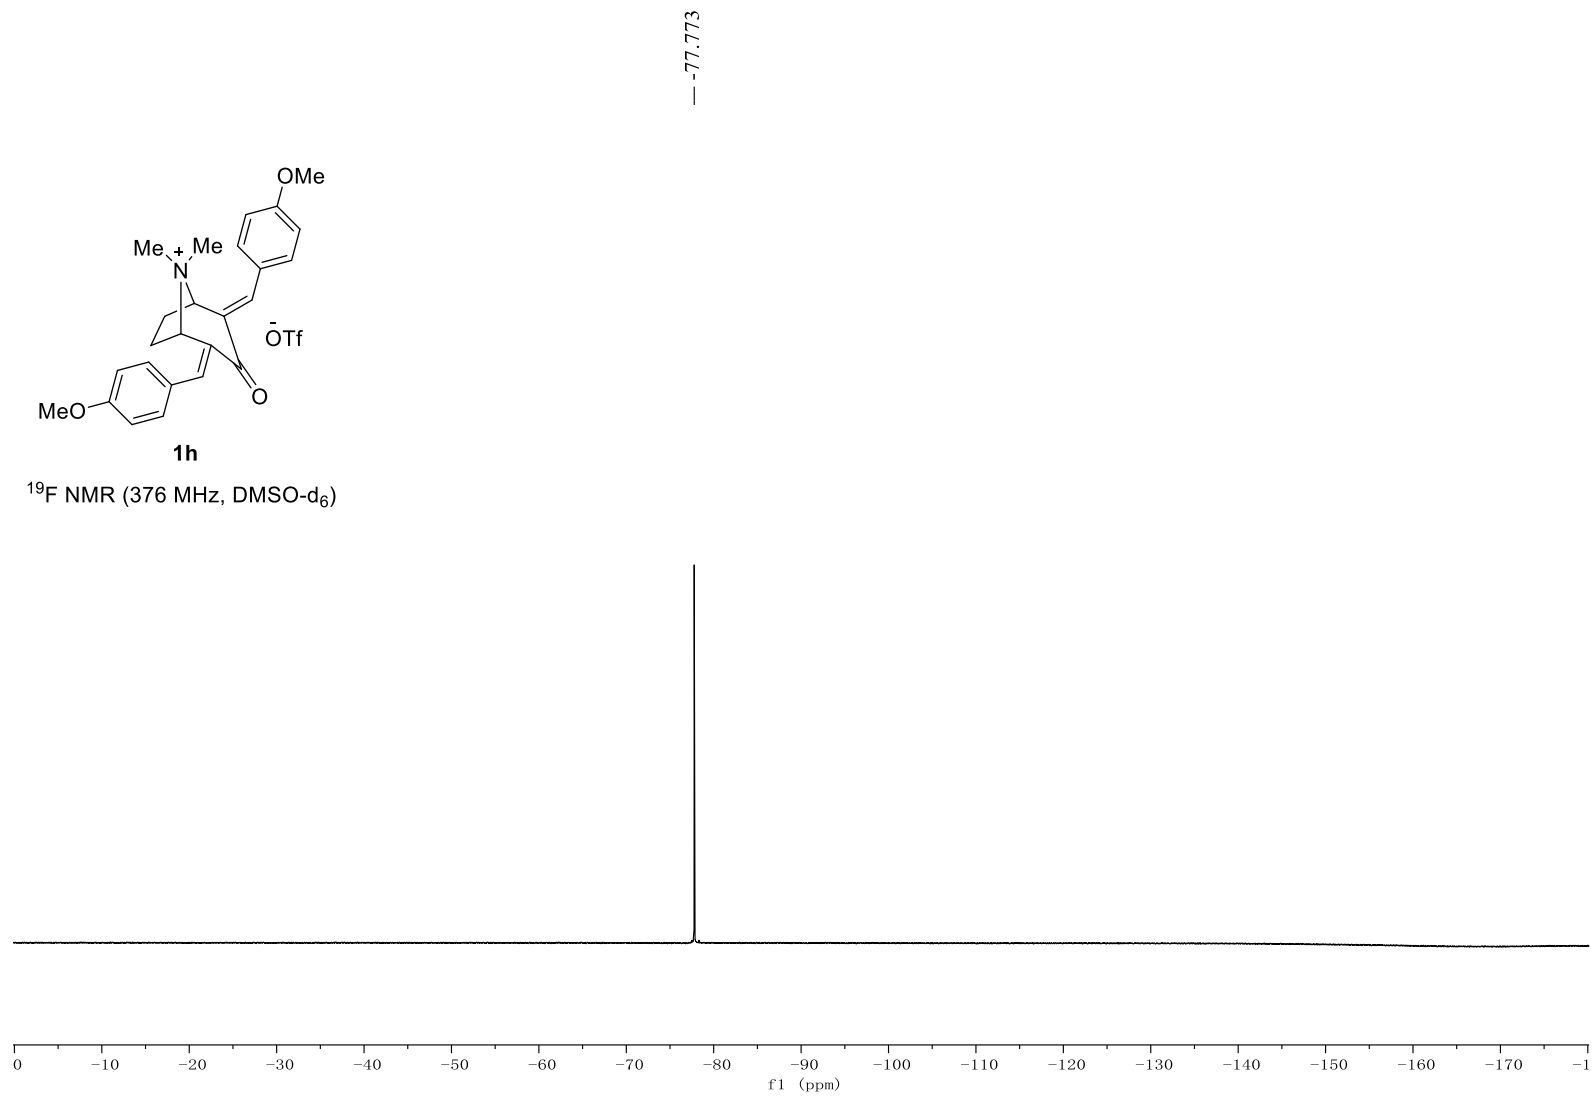

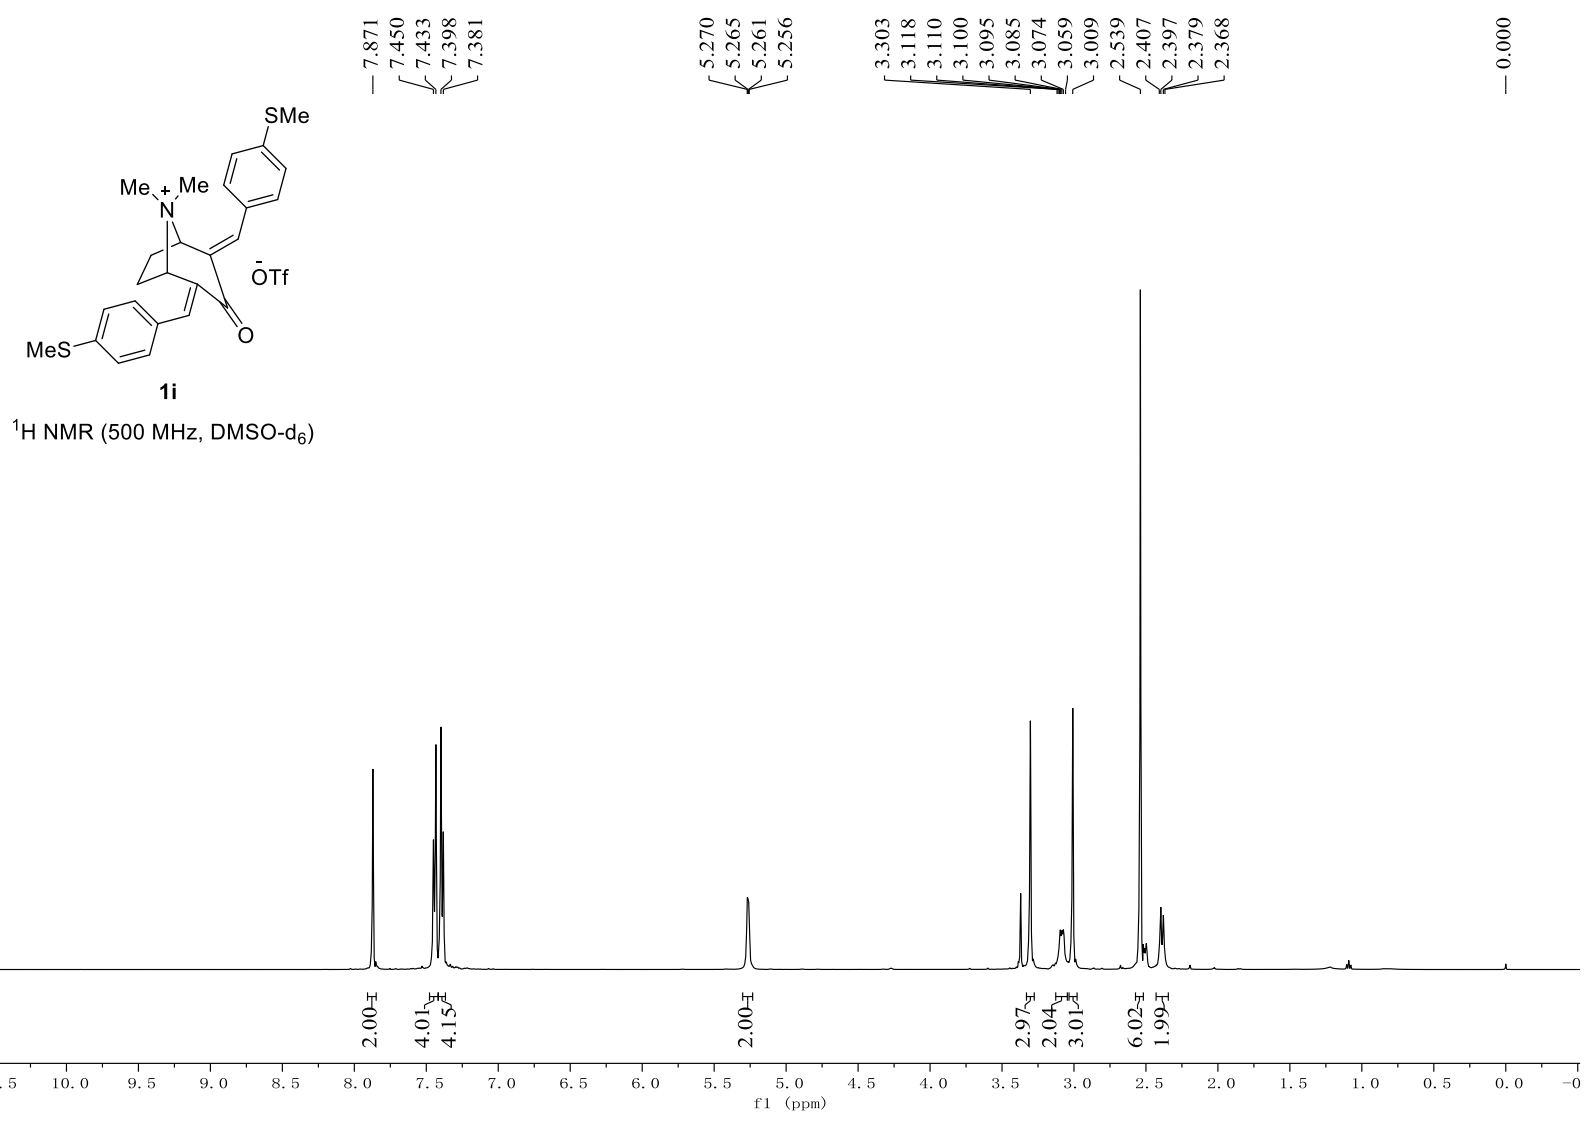

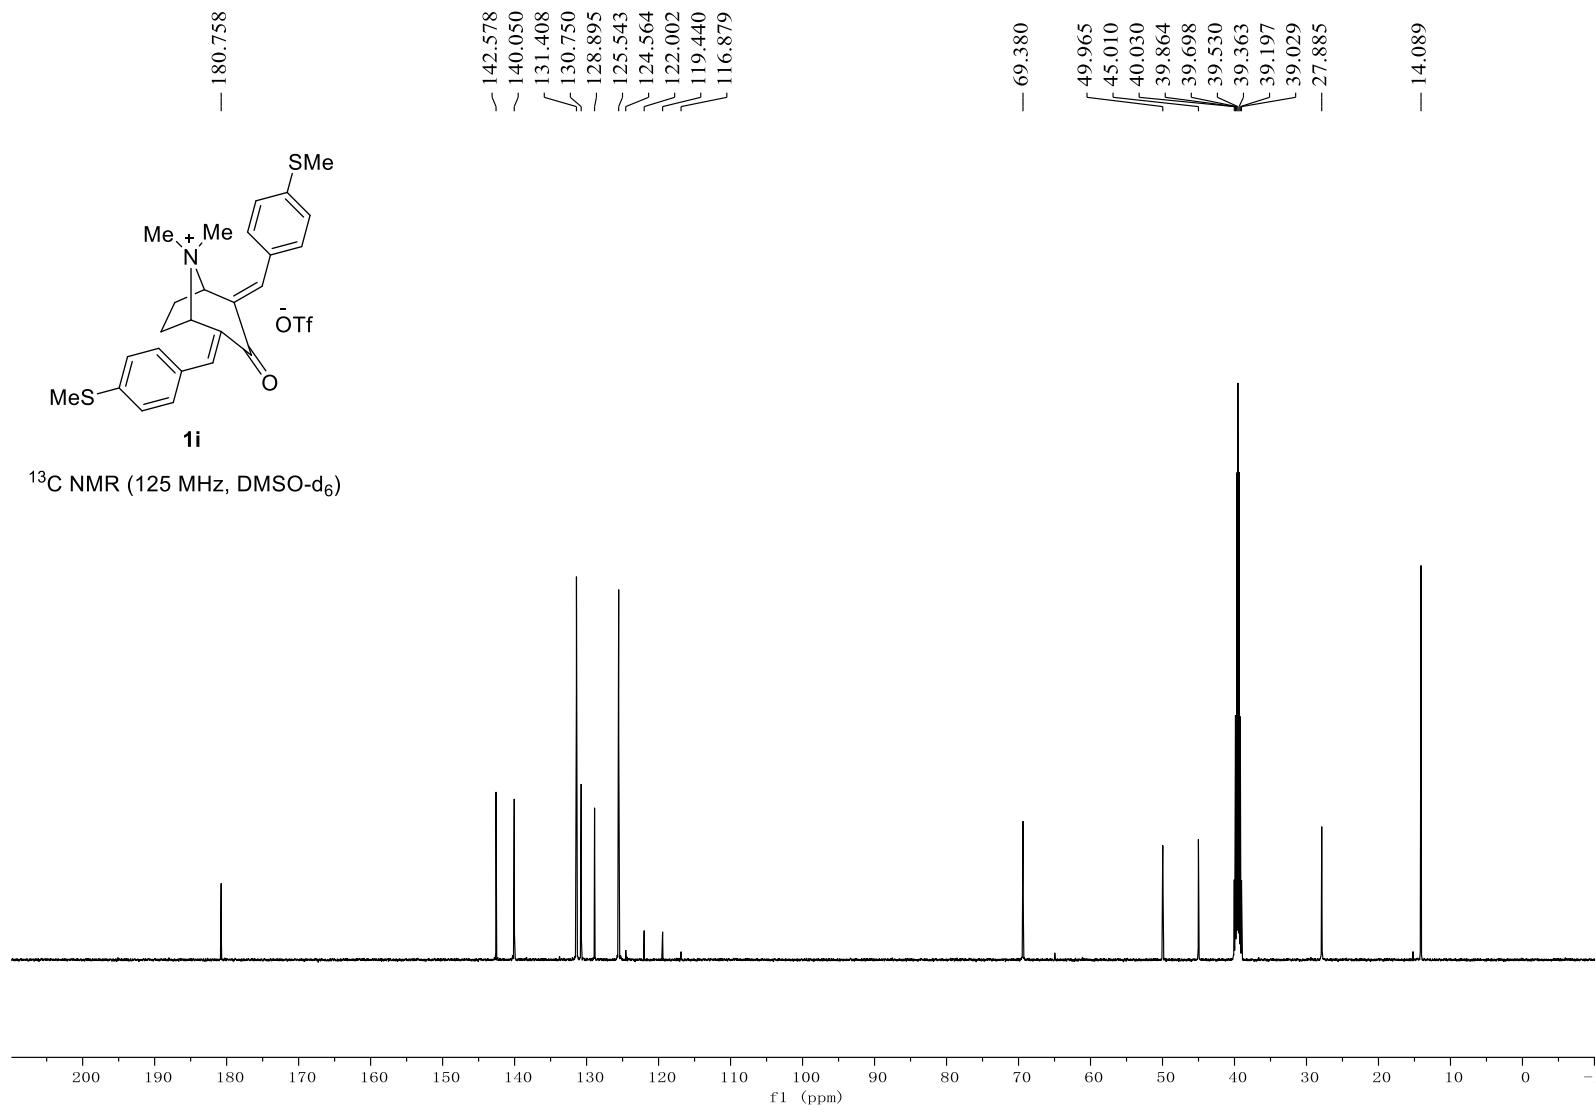



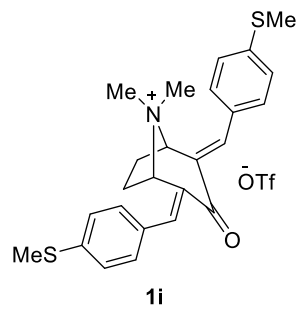

<sup>19</sup>F NMR (376 MHz, DMSO-d<sub>6</sub>)

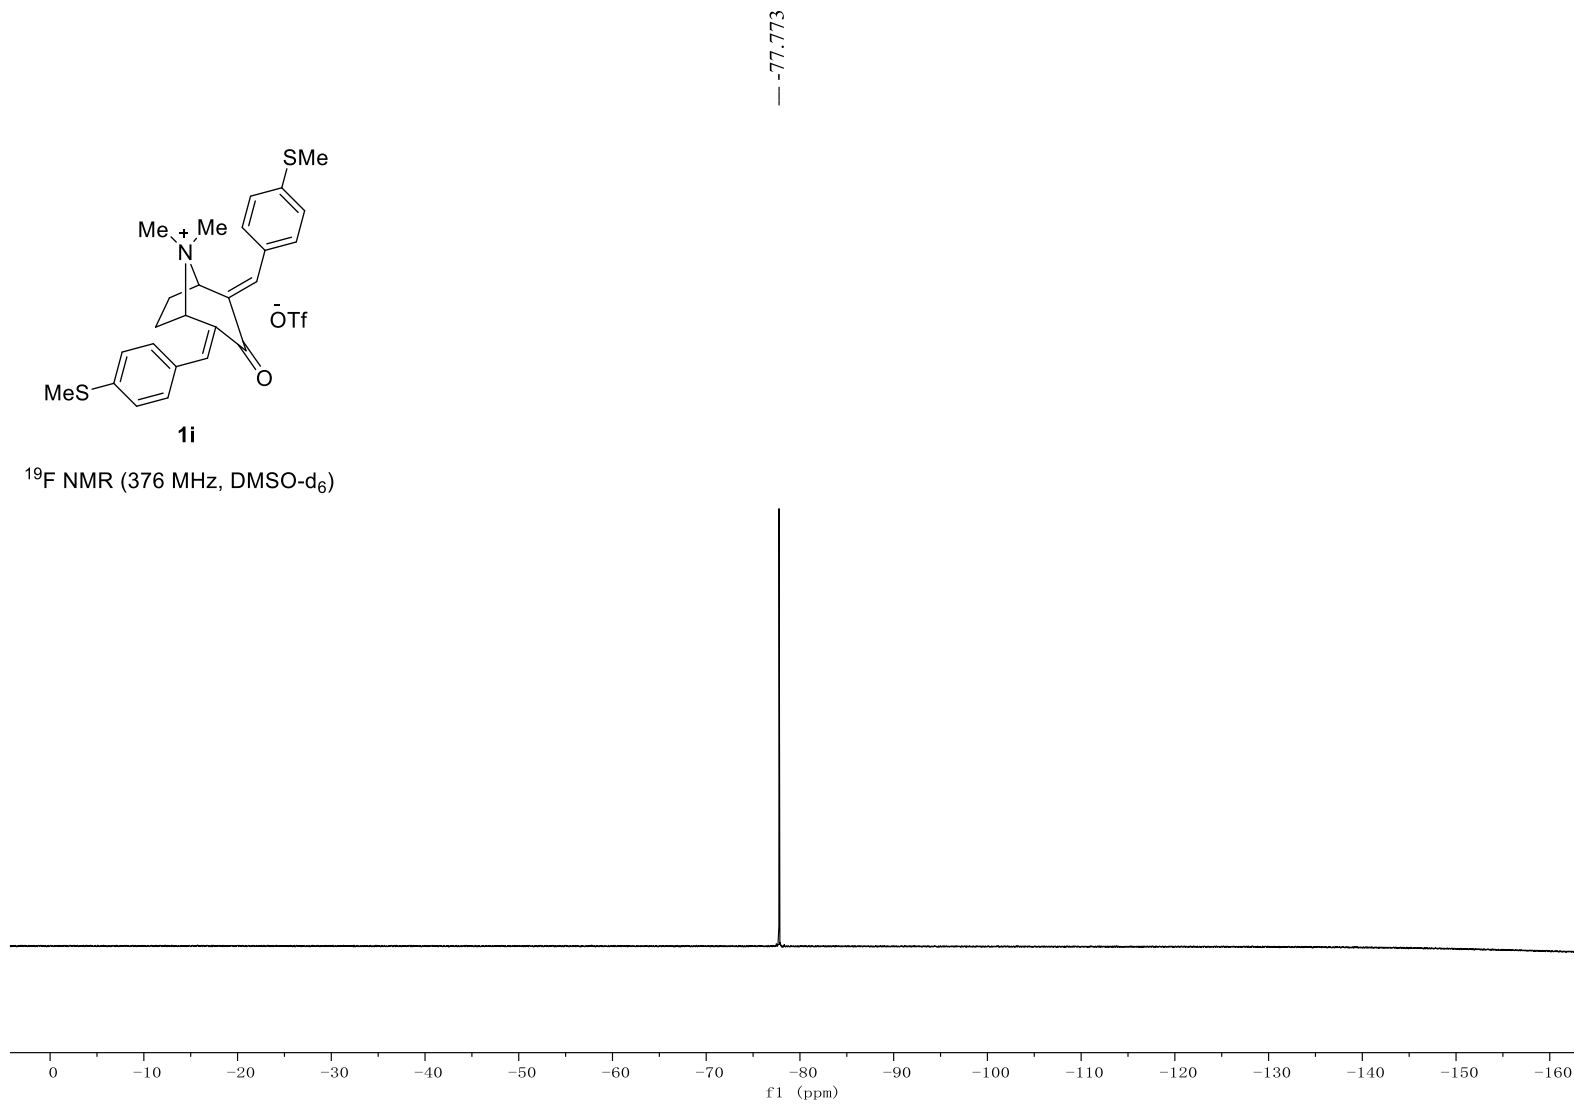

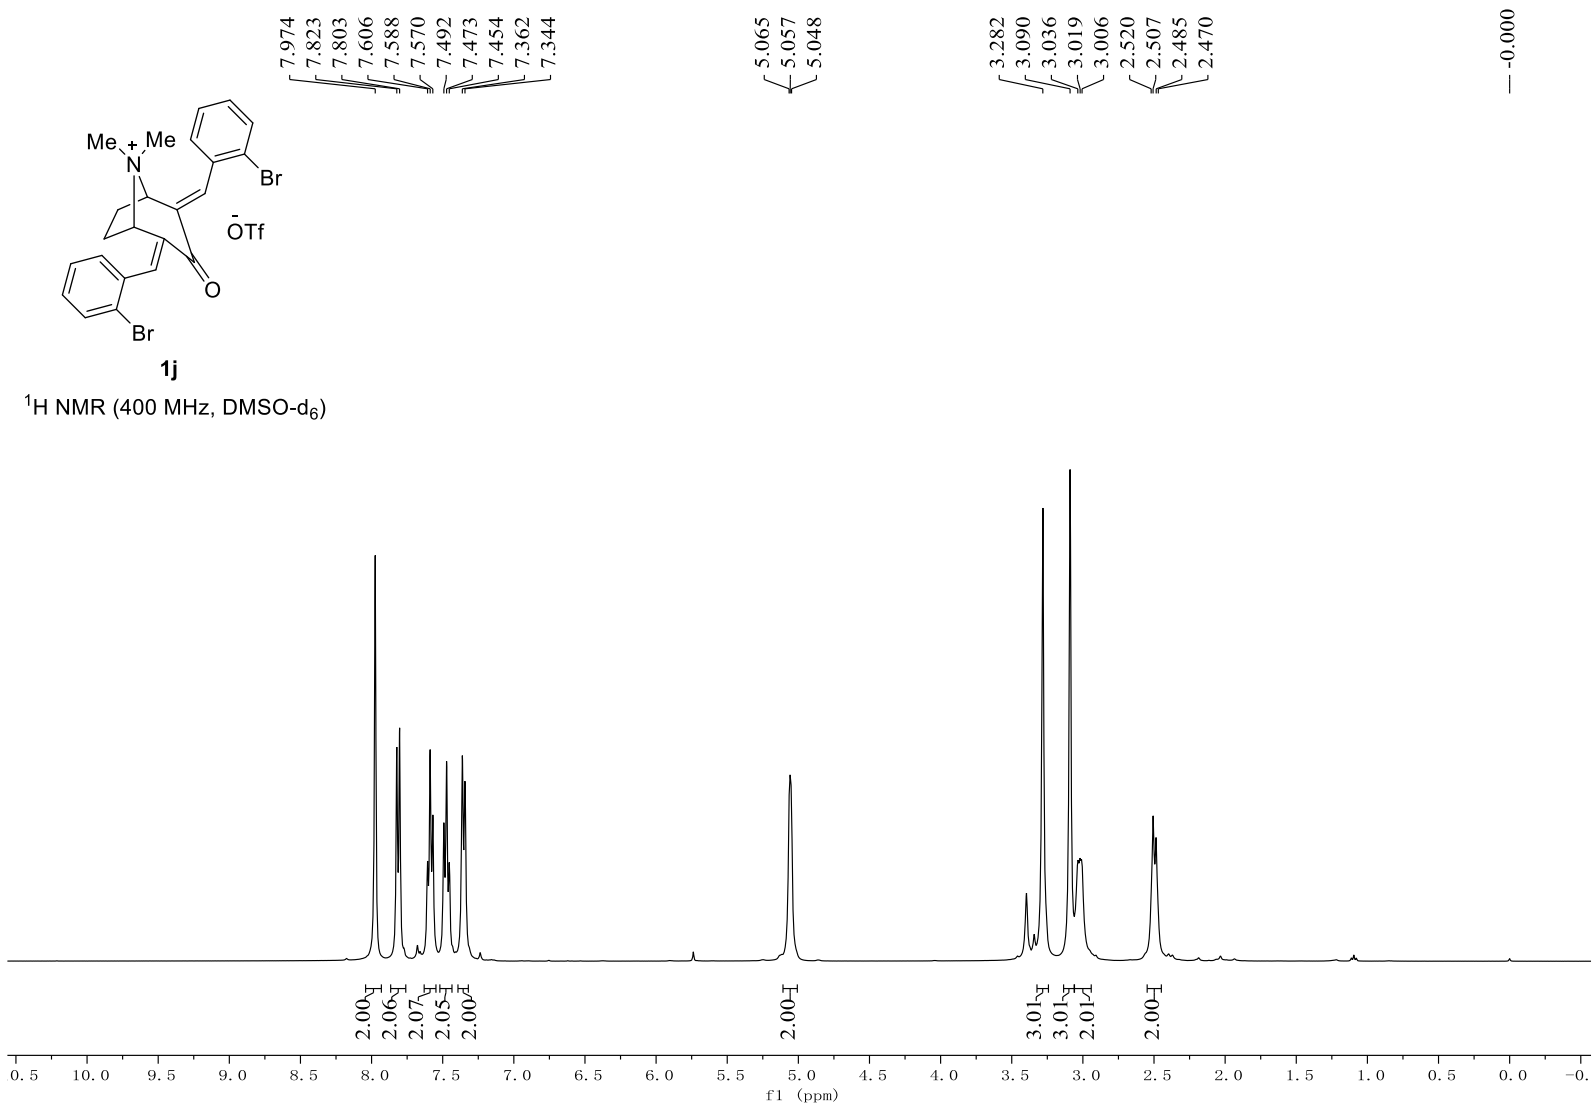

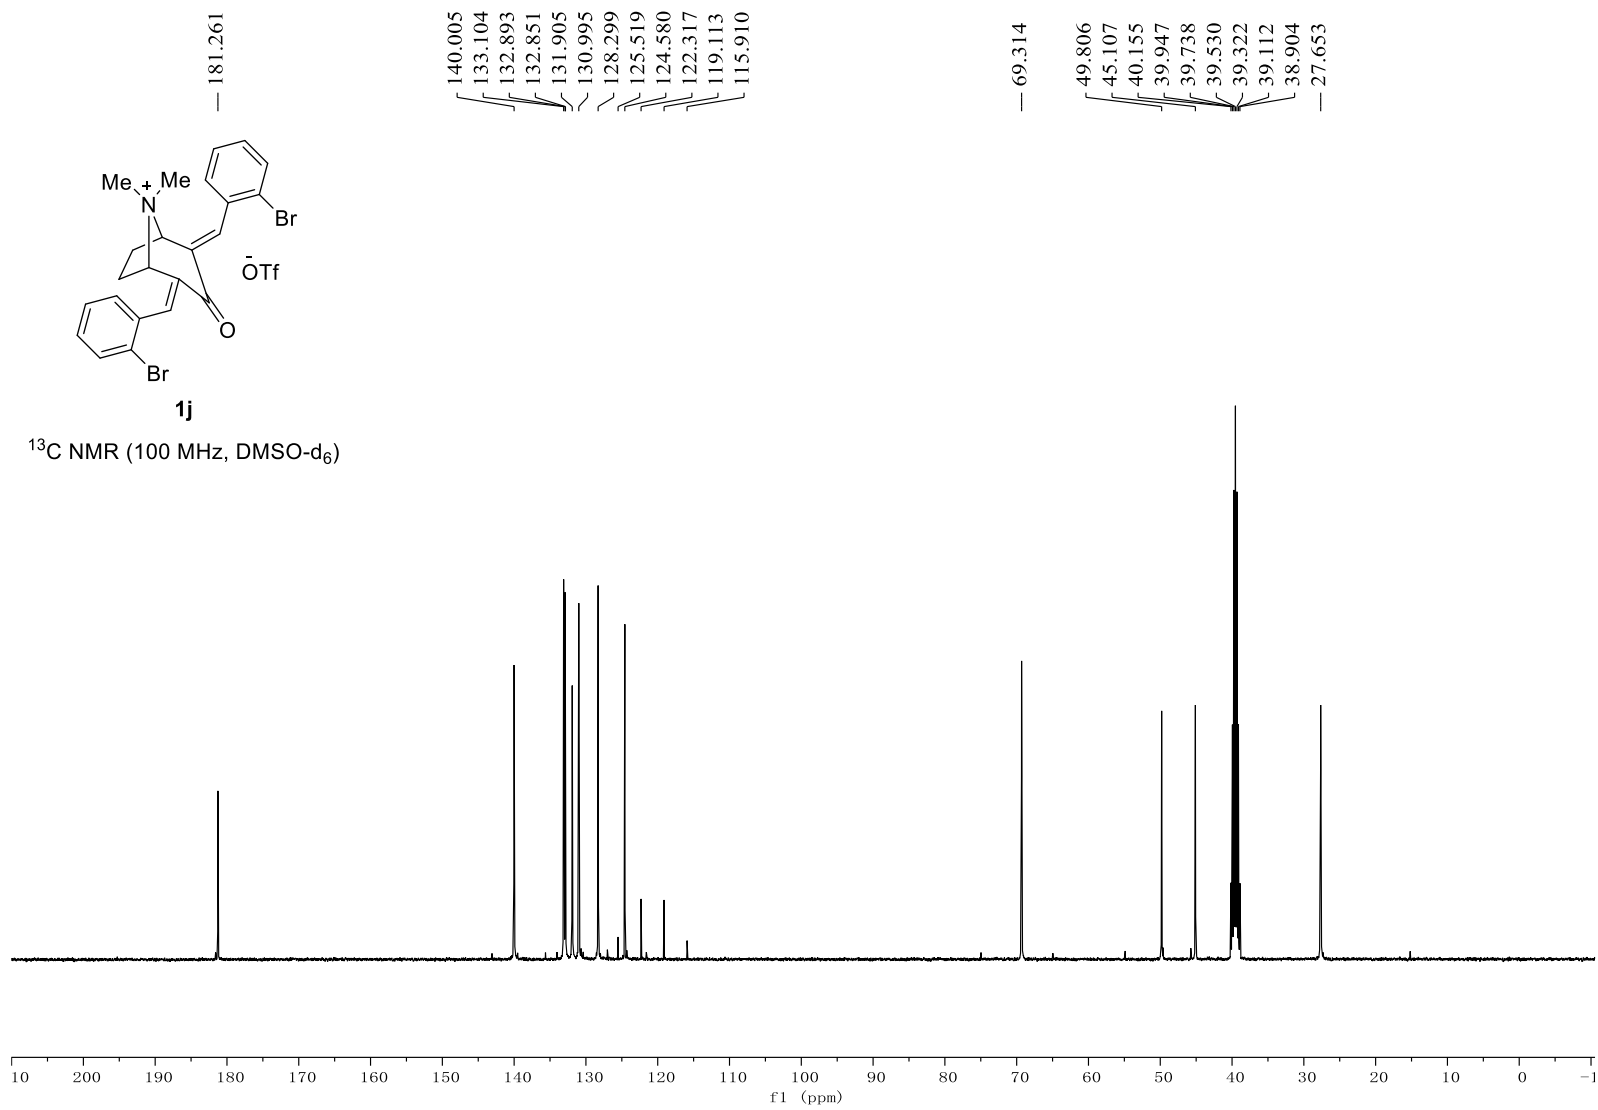

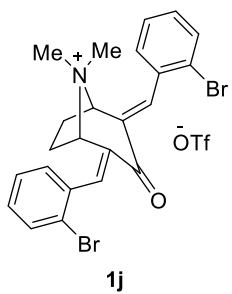

<sup>19</sup>F NMR (376 MHz, DMSO-d<sub>6</sub>)

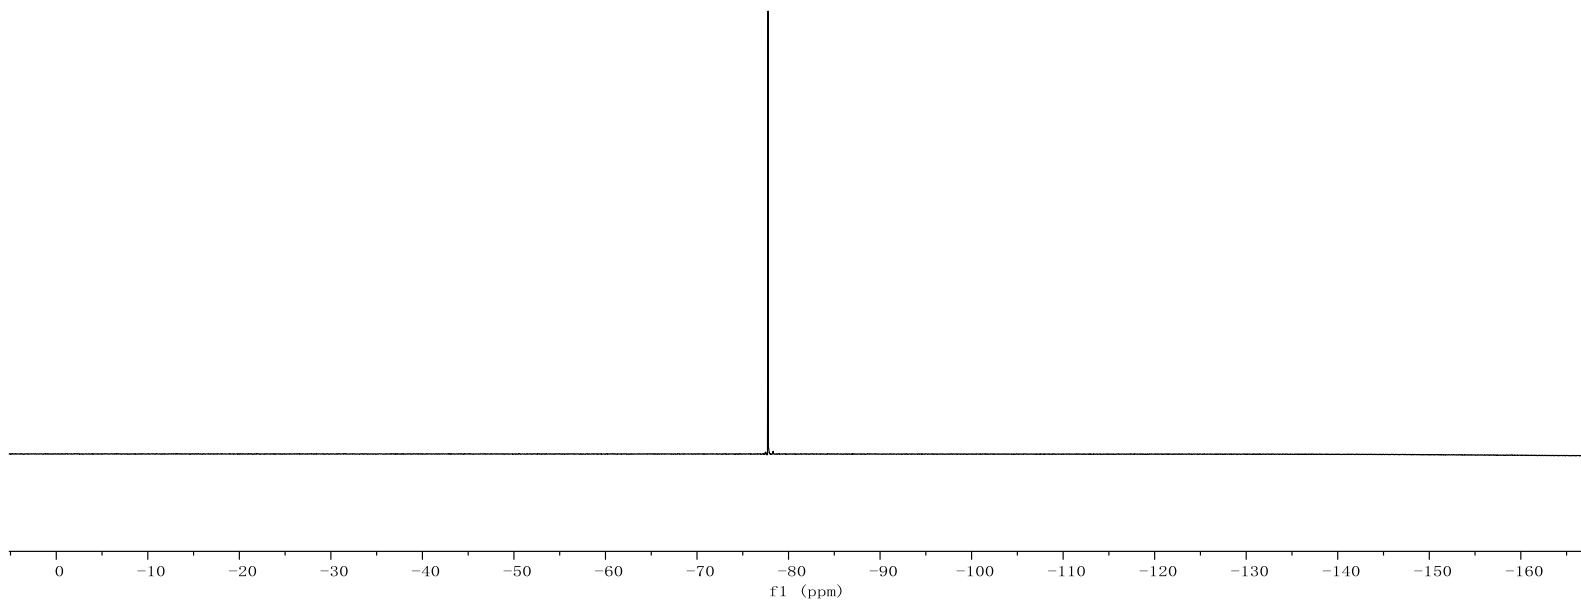

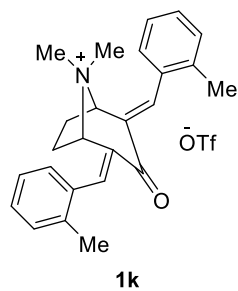

<sup>1</sup>H NMR (500 MHz, DMSO-d<sub>6</sub>)

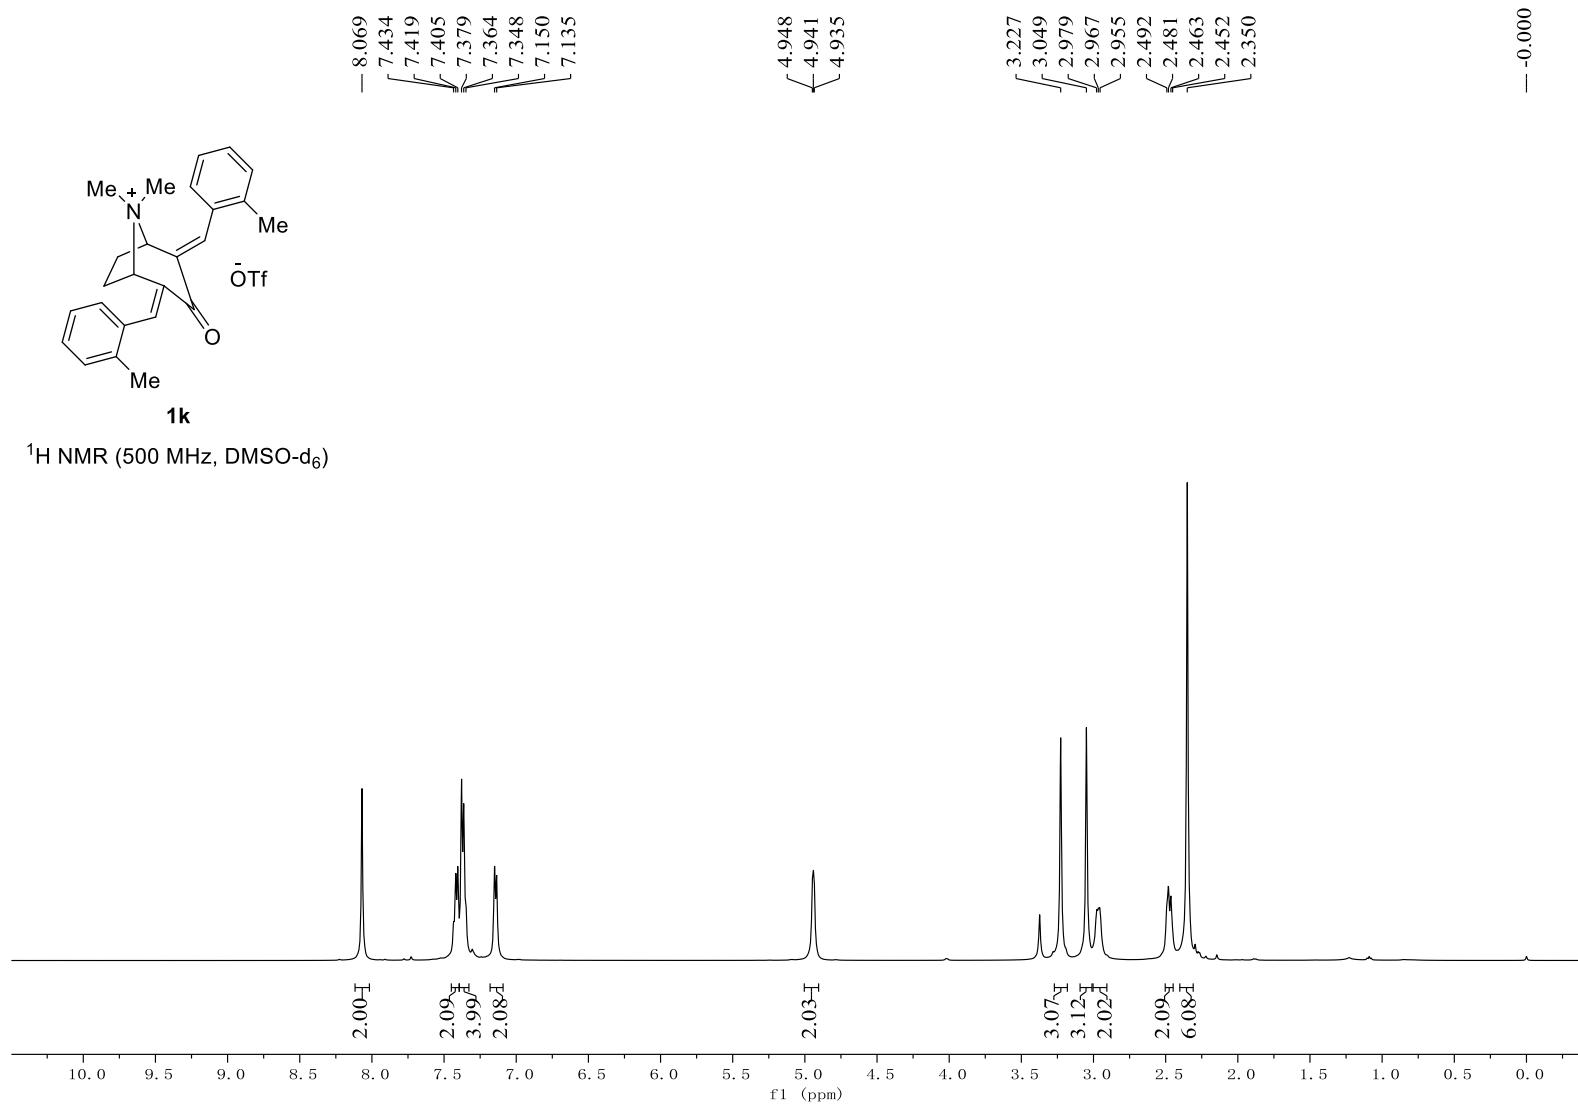

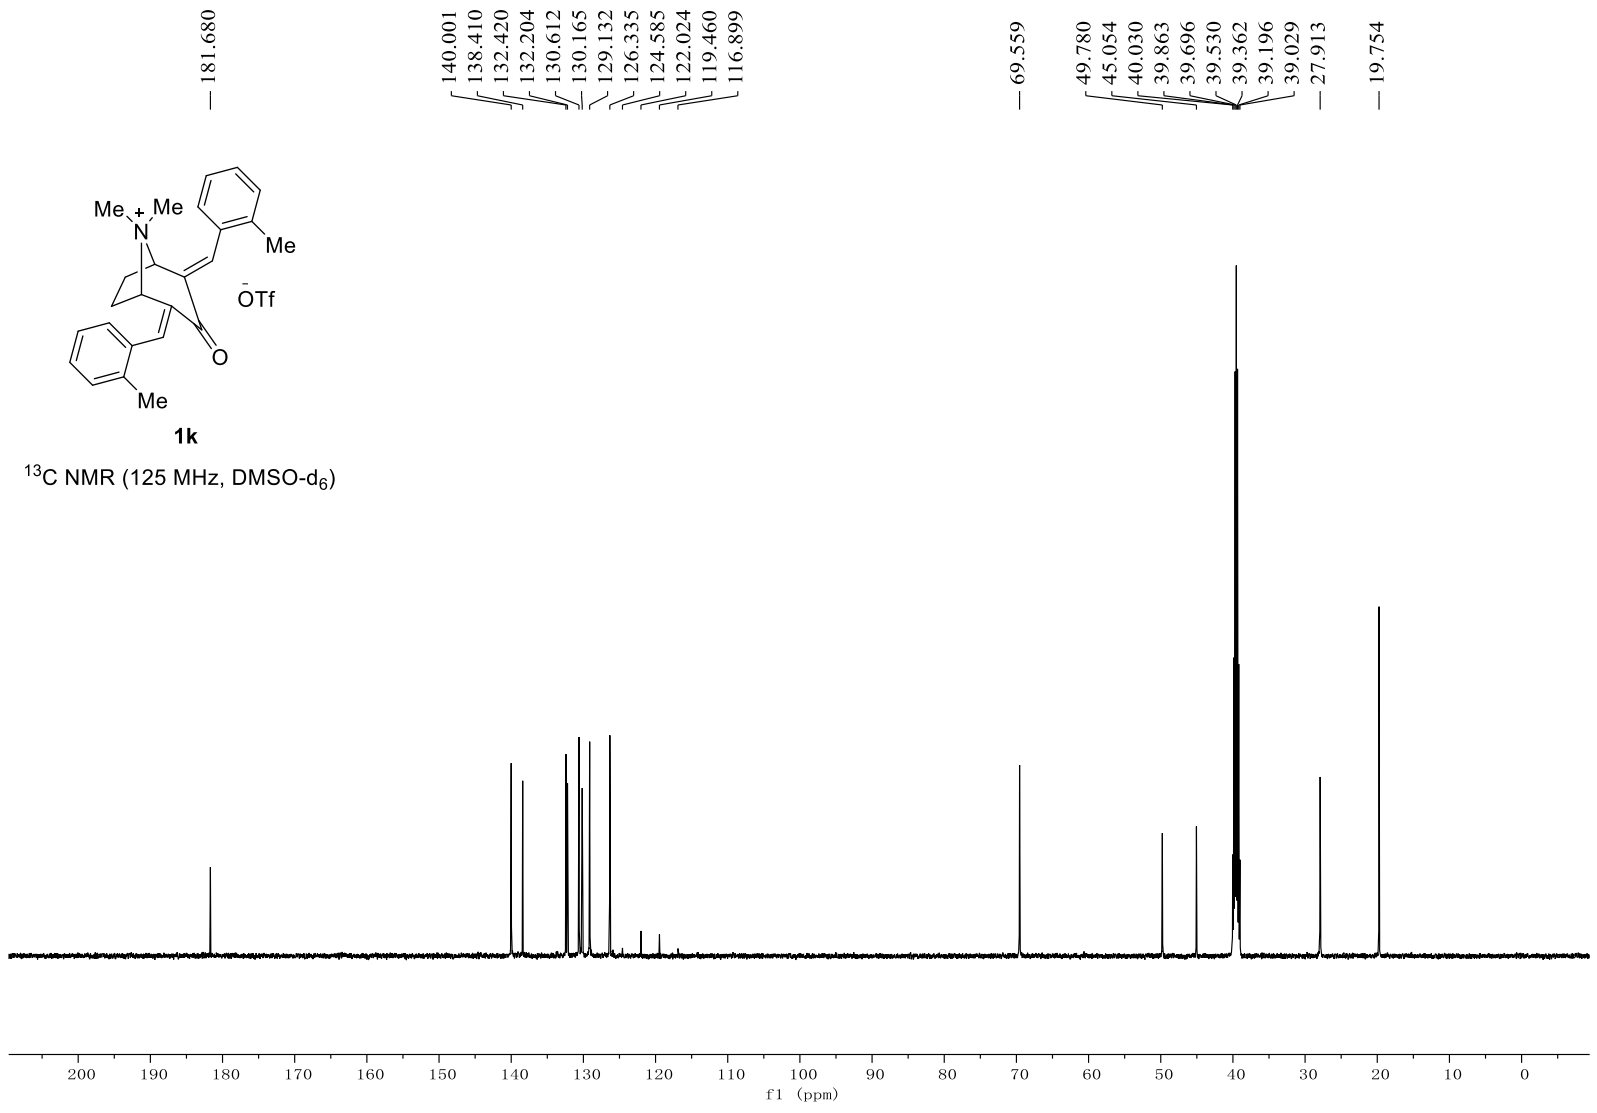

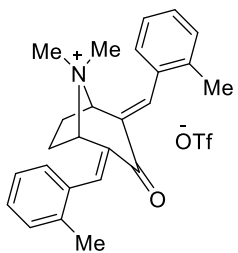

**1k**

$^{19}\text{F}$  NMR (471 MHz, DMSO- $d_6$ )

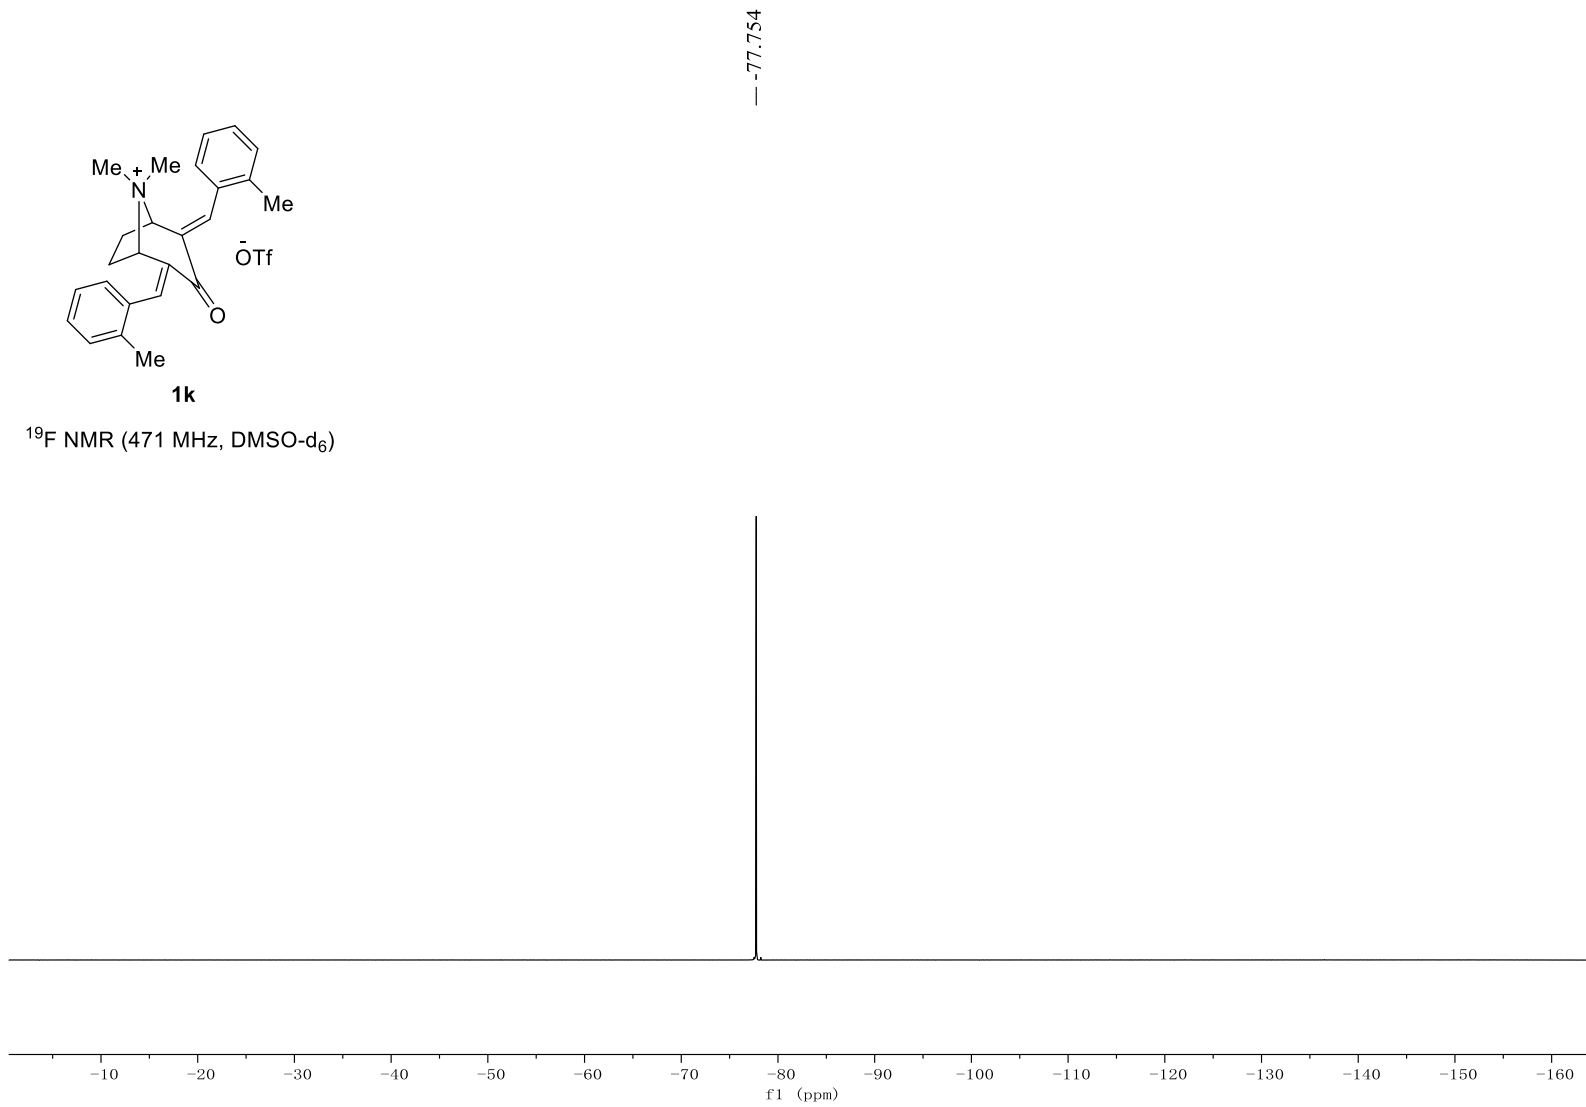

-77.754

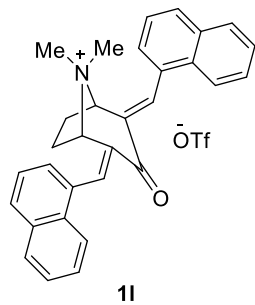

<sup>1</sup>H NMR (500 MHz, DMSO-d<sub>6</sub>)

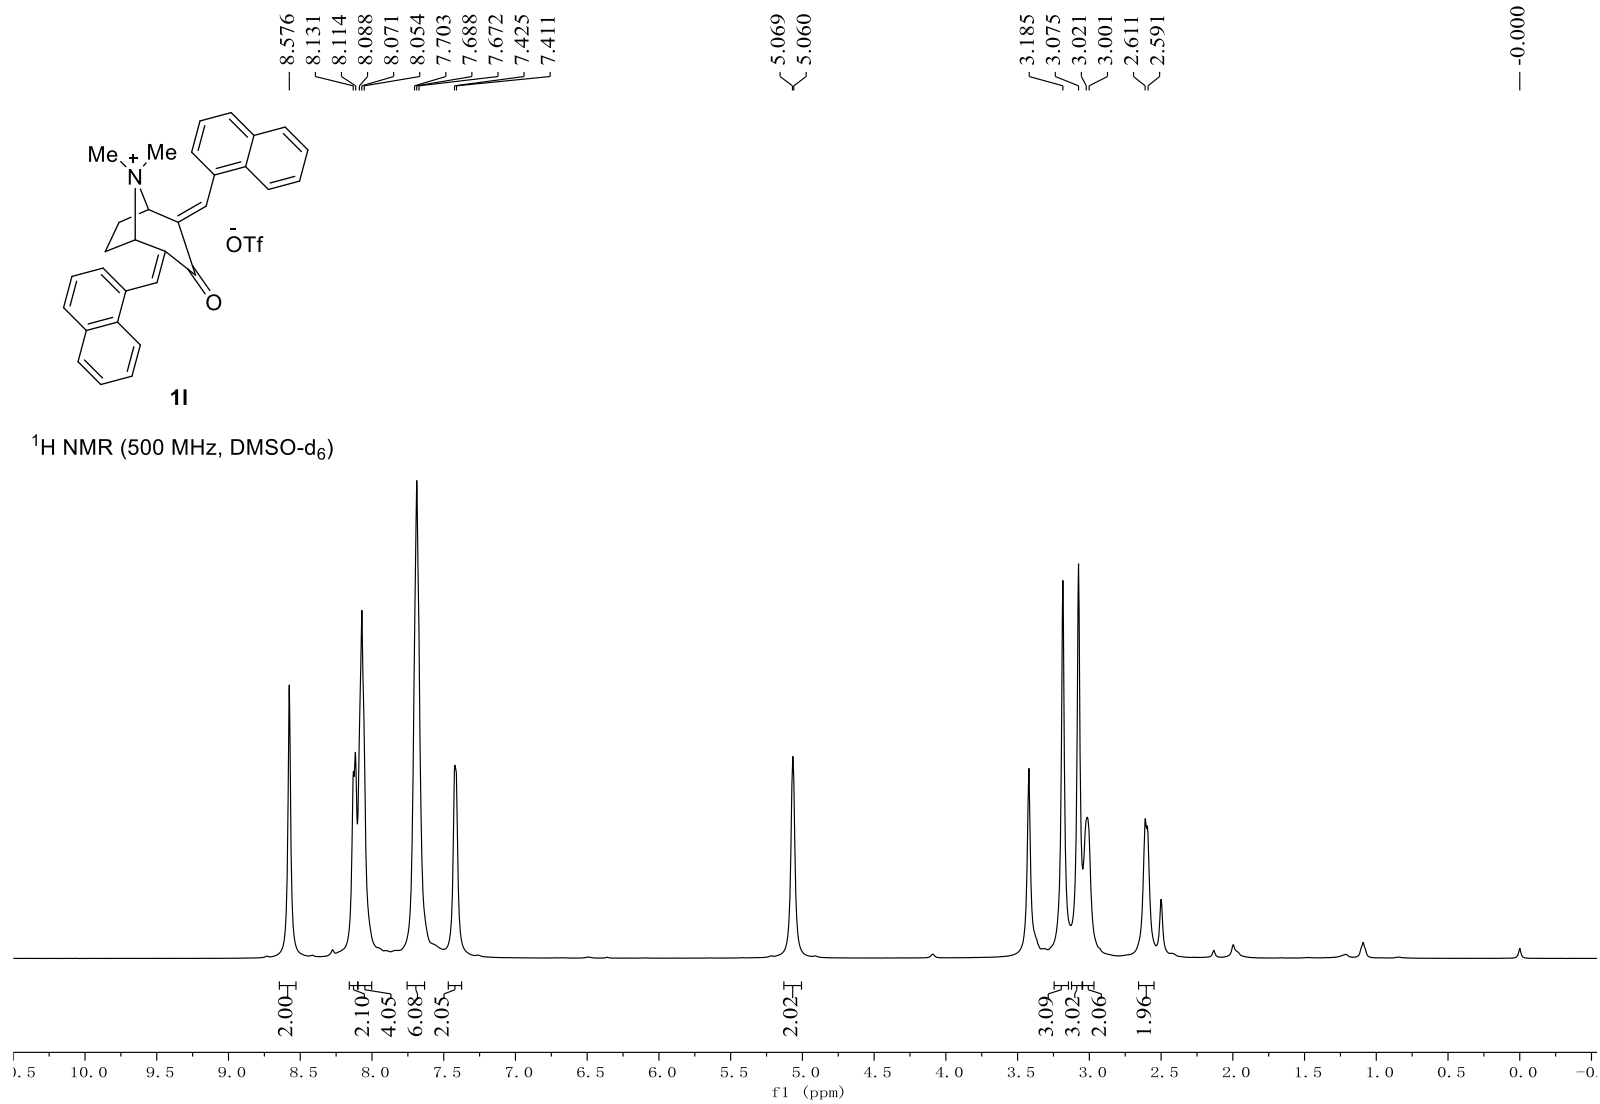



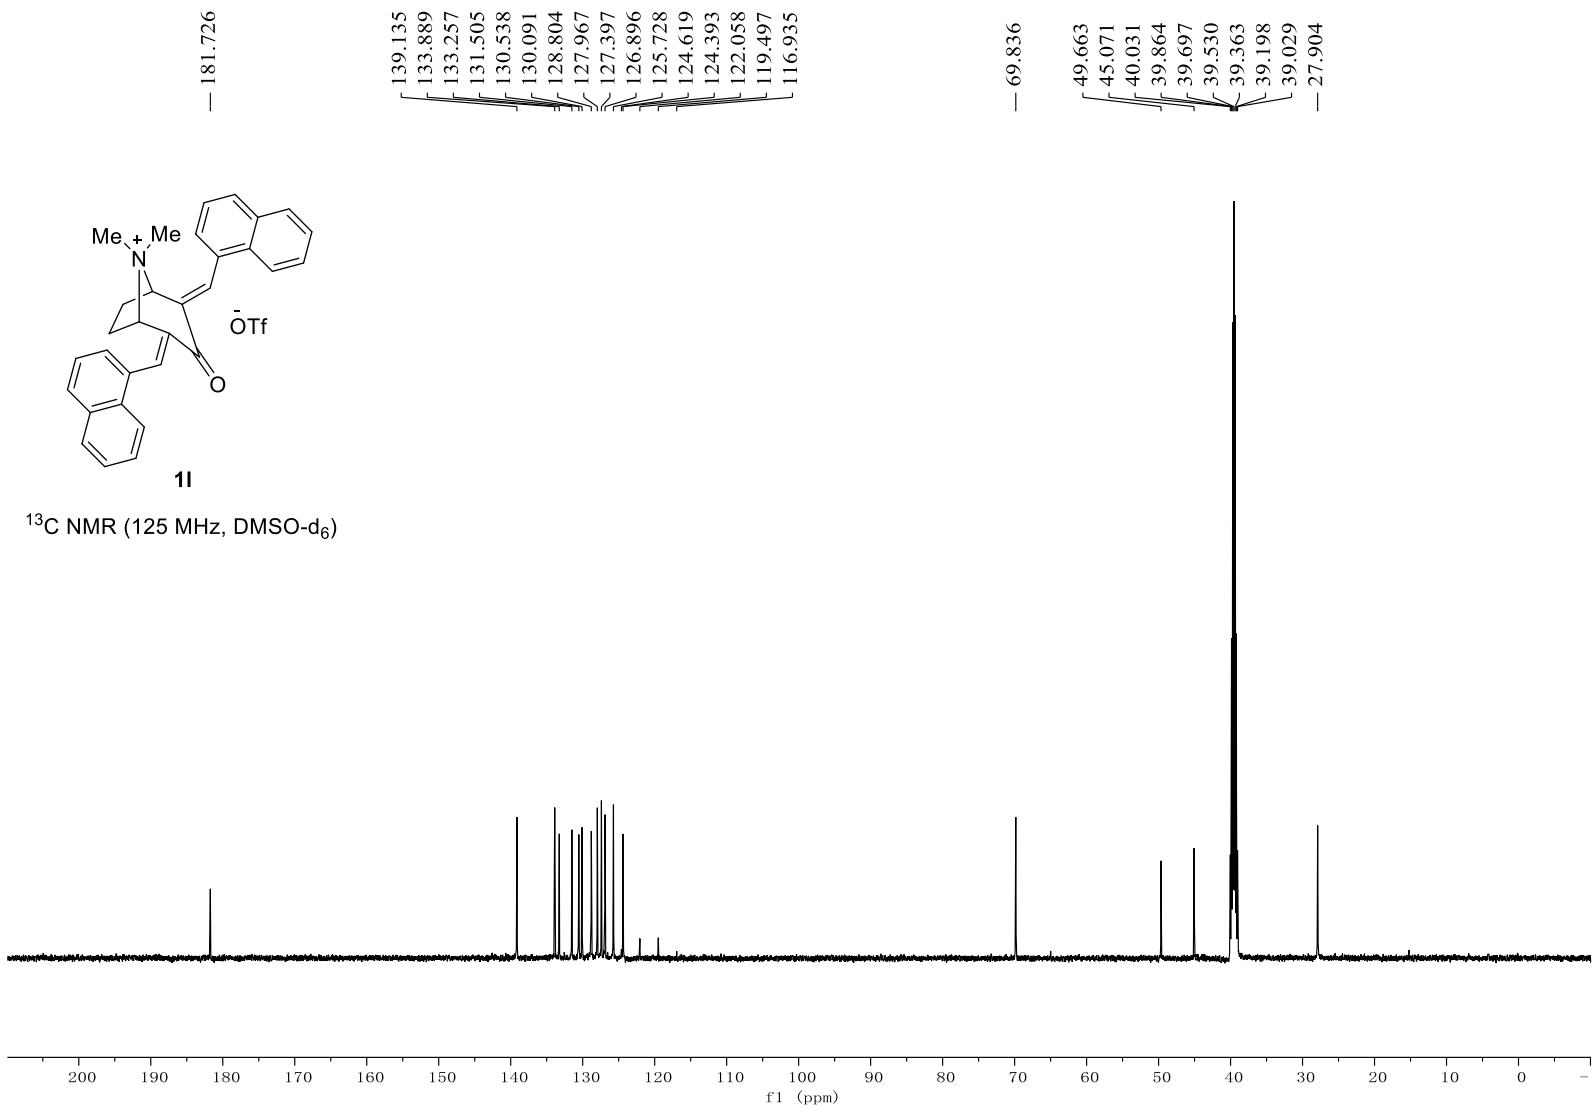

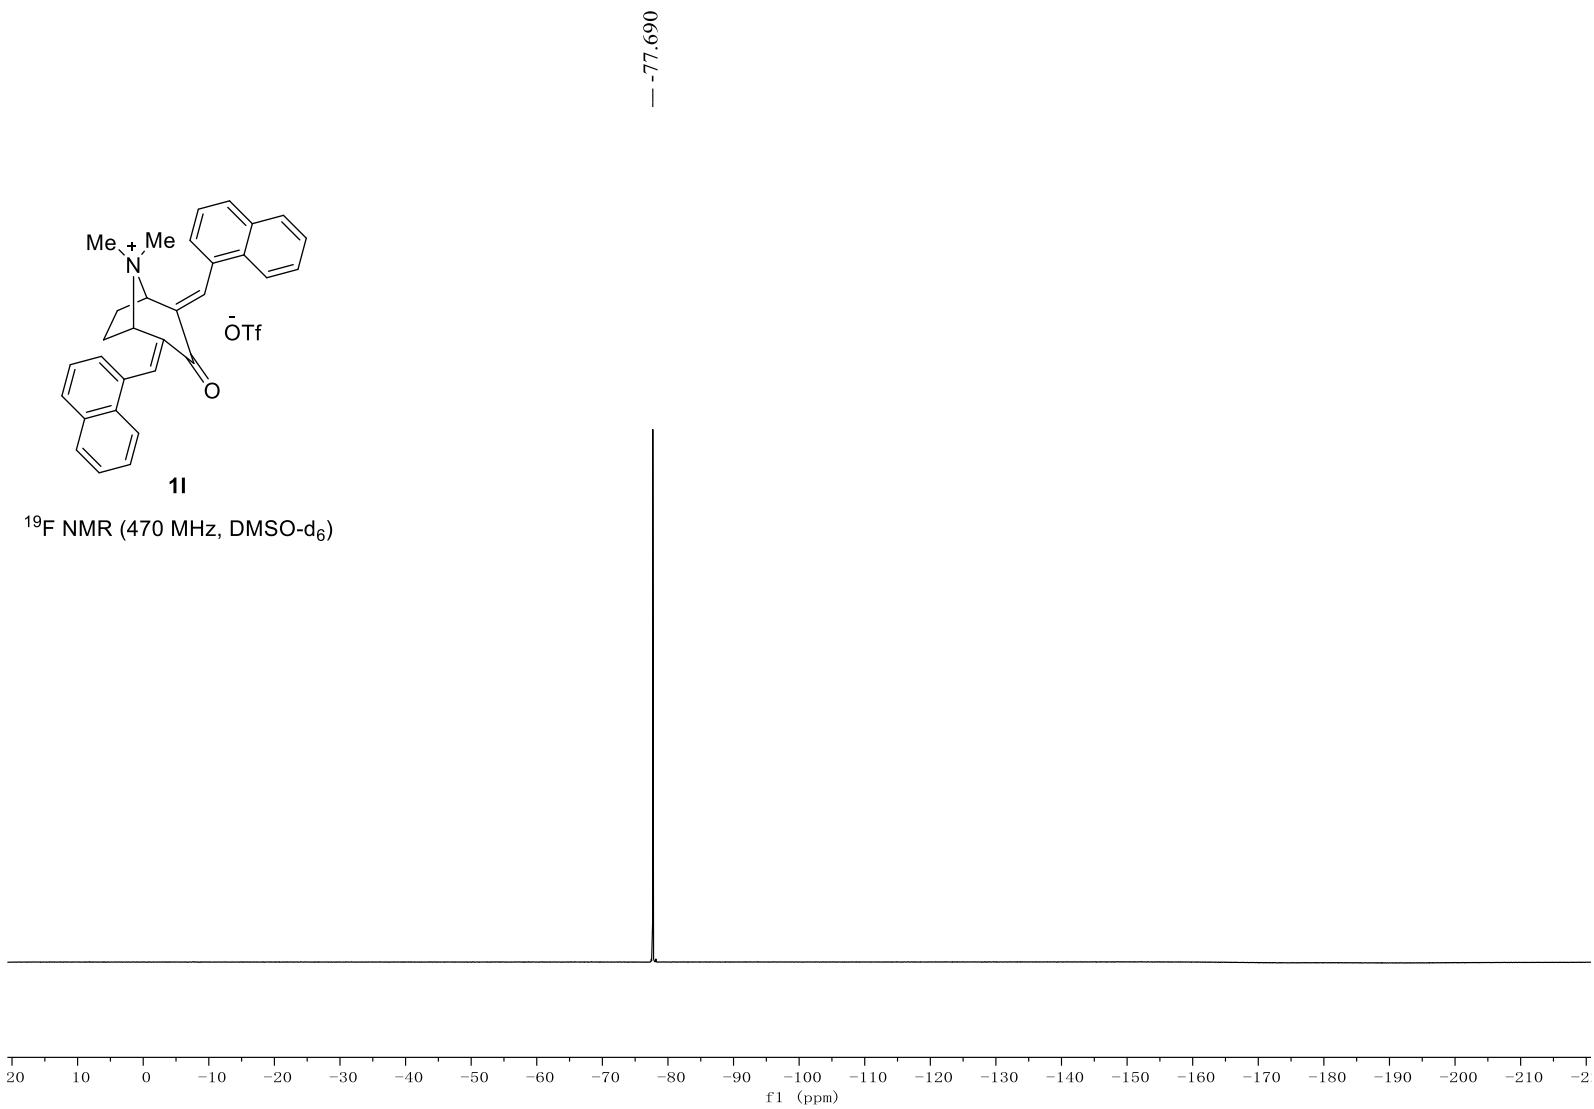

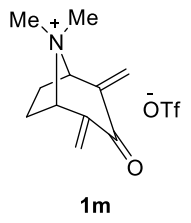

<sup>1</sup>H NMR (500 MHz, DMSO-d<sub>6</sub>)

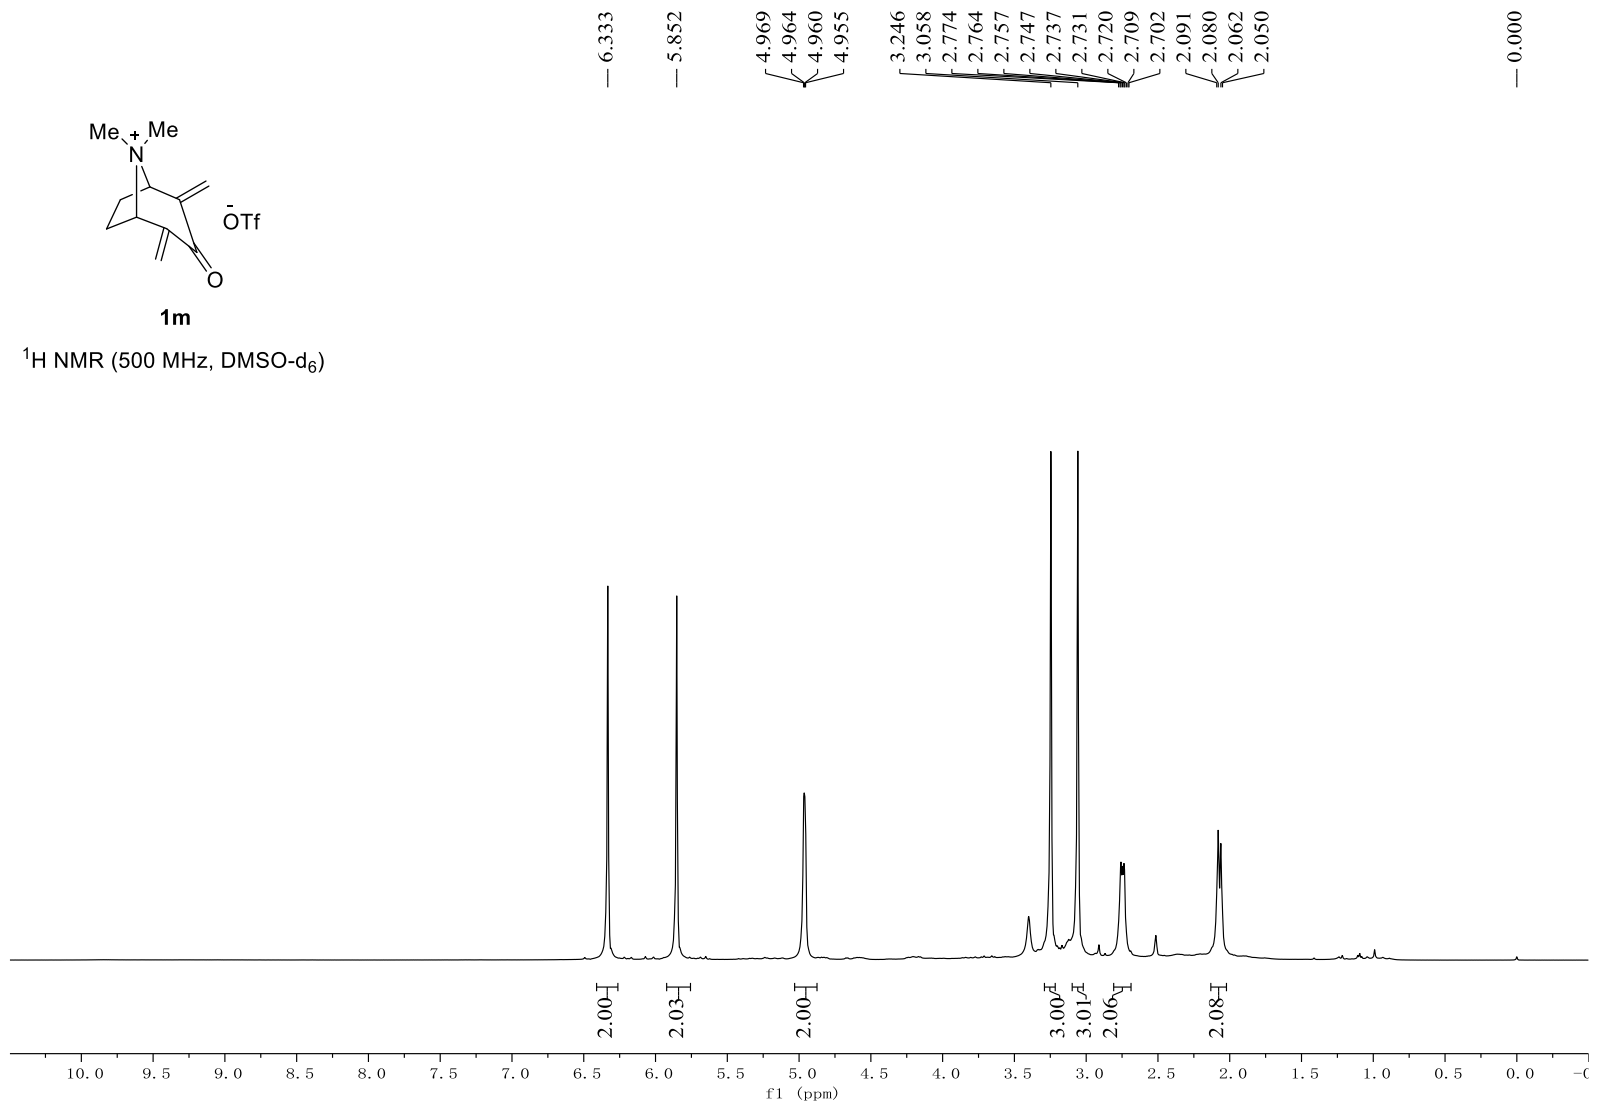

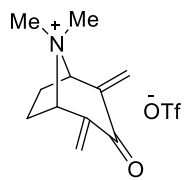

**1m**

<sup>13</sup>C NMR (125 MHz, DMSO-d<sub>6</sub>)

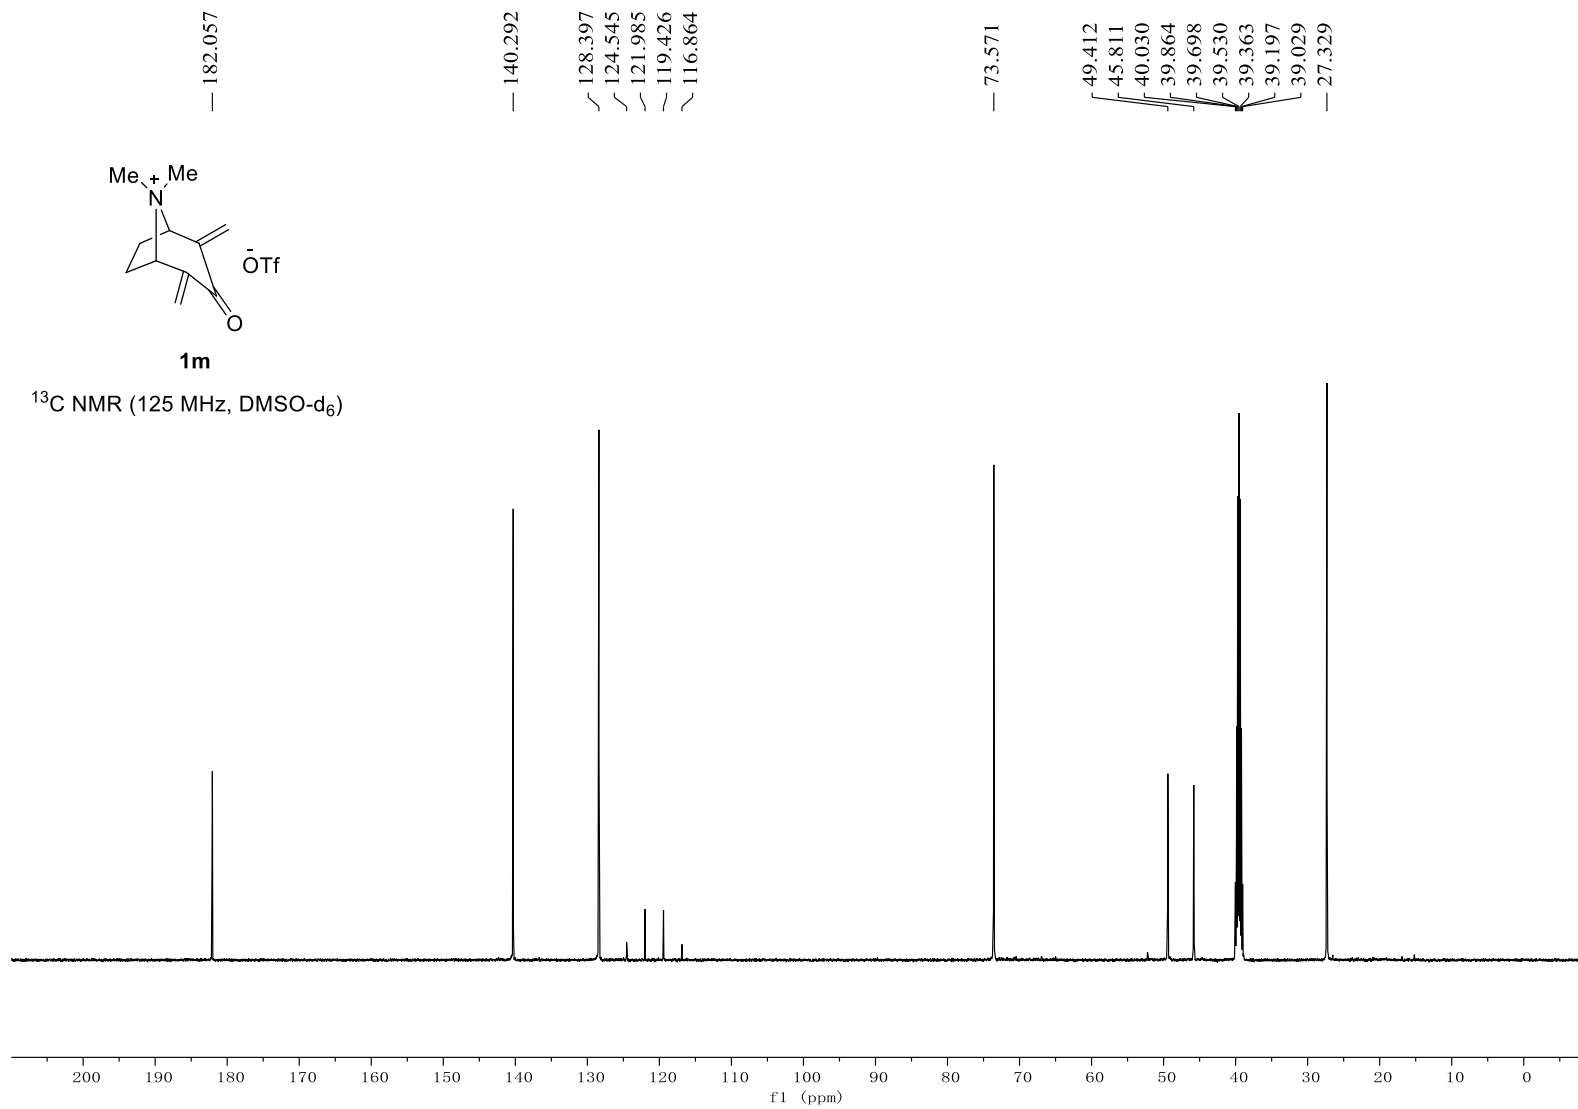

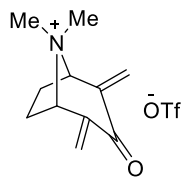

**1m**

<sup>19</sup>F NMR (471 MHz, DMSO-d<sub>6</sub>)

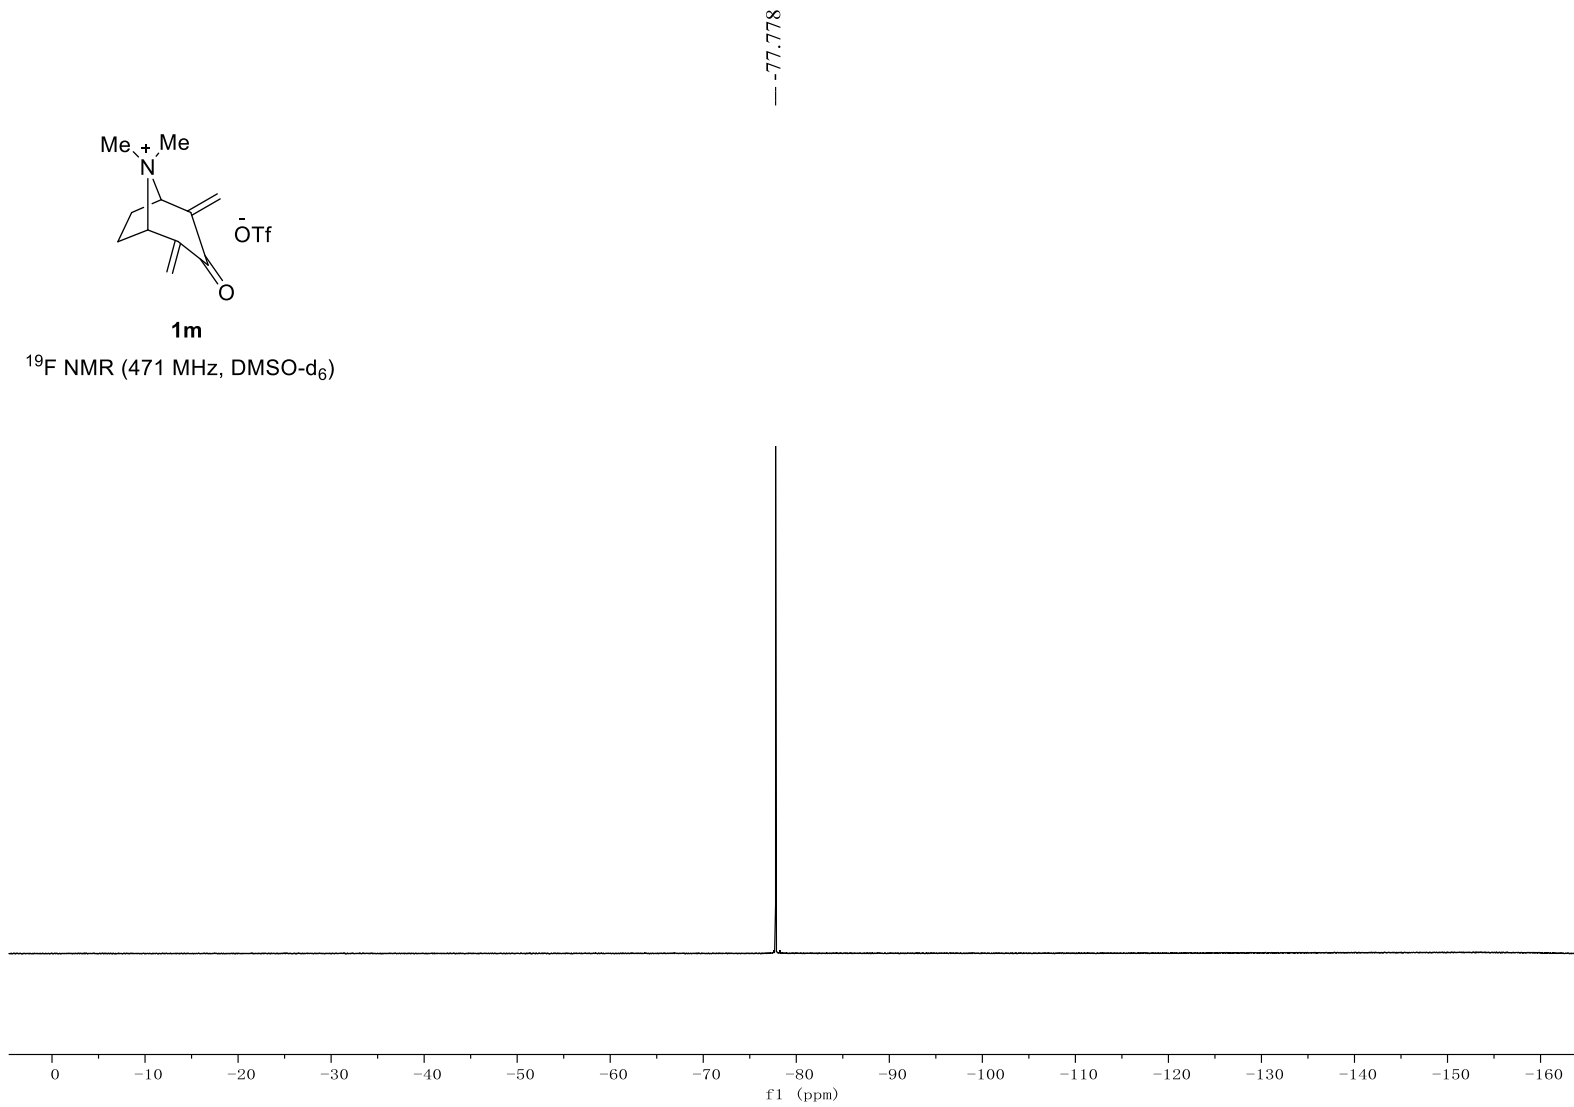

6.737  
6.716  
5.107  
5.102  
5.098  
5.093  
3.299  
2.982  
2.789  
2.783  
2.773  
2.762  
2.757  
2.521  
2.515  
2.511  
2.507  
2.500  
2.492  
1.969  
1.958  
1.941  
1.730  
1.724  
1.717  
1.705  
1.698  
1.691  
1.674  
1.664  
1.654  
1.646  
1.639  
1.634  
1.630  
1.529  
1.521  
1.502  
1.495  
1.356  
1.349  
1.341  
1.334  
1.329  
1.324  
1.316  
1.308  
1.301  
1.237  
1.231  
1.215  
1.211  
1.205  
1.197  
1.193  
1.186  
1.178  
1.171  
1.154  
1.147

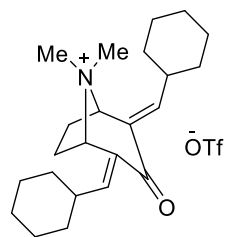

**1n**

<sup>1</sup>H NMR (500 MHz, DMSO-d<sub>6</sub>)

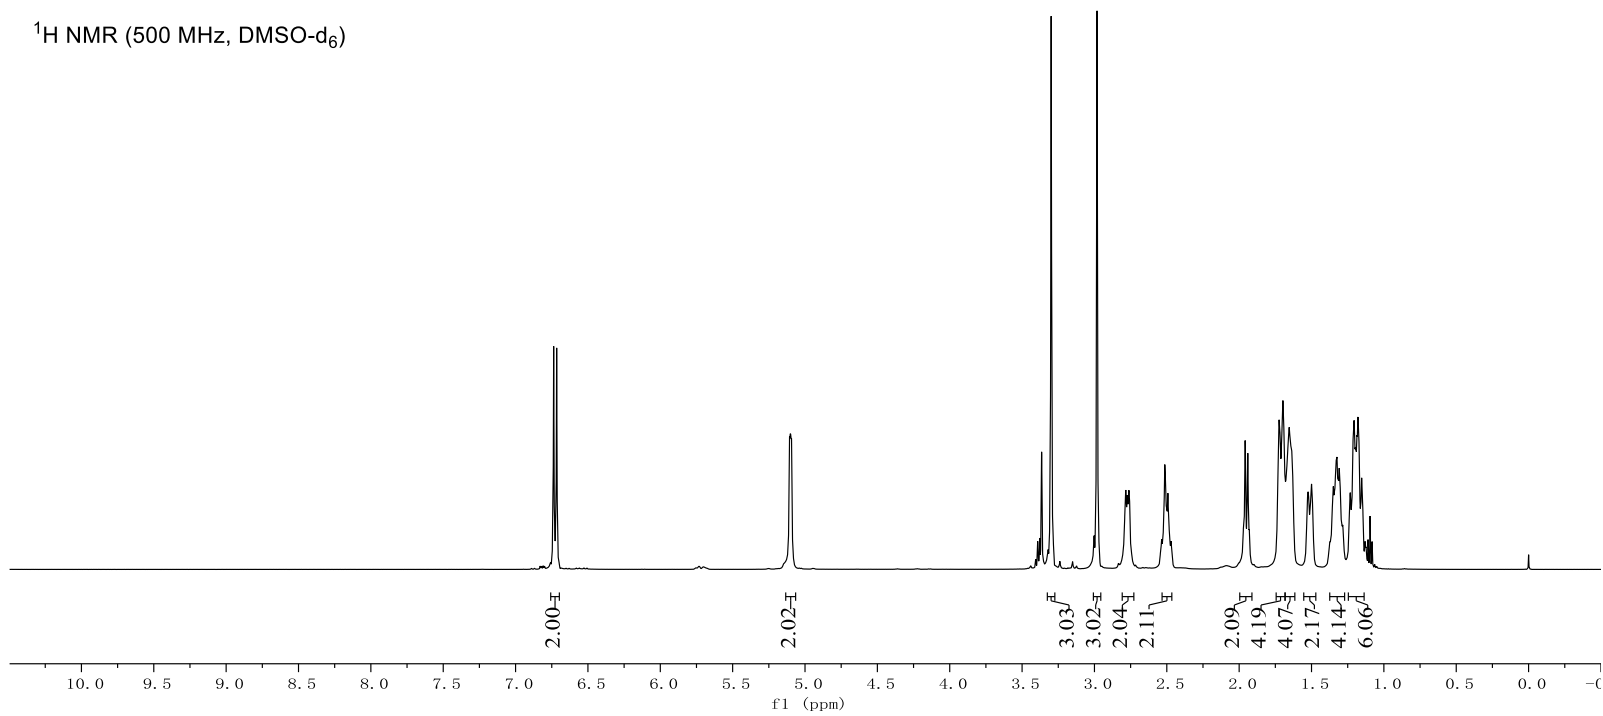

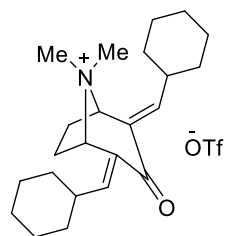

**1n**

<sup>13</sup>C NMR (125 MHz, DMSO-d<sub>6</sub>)

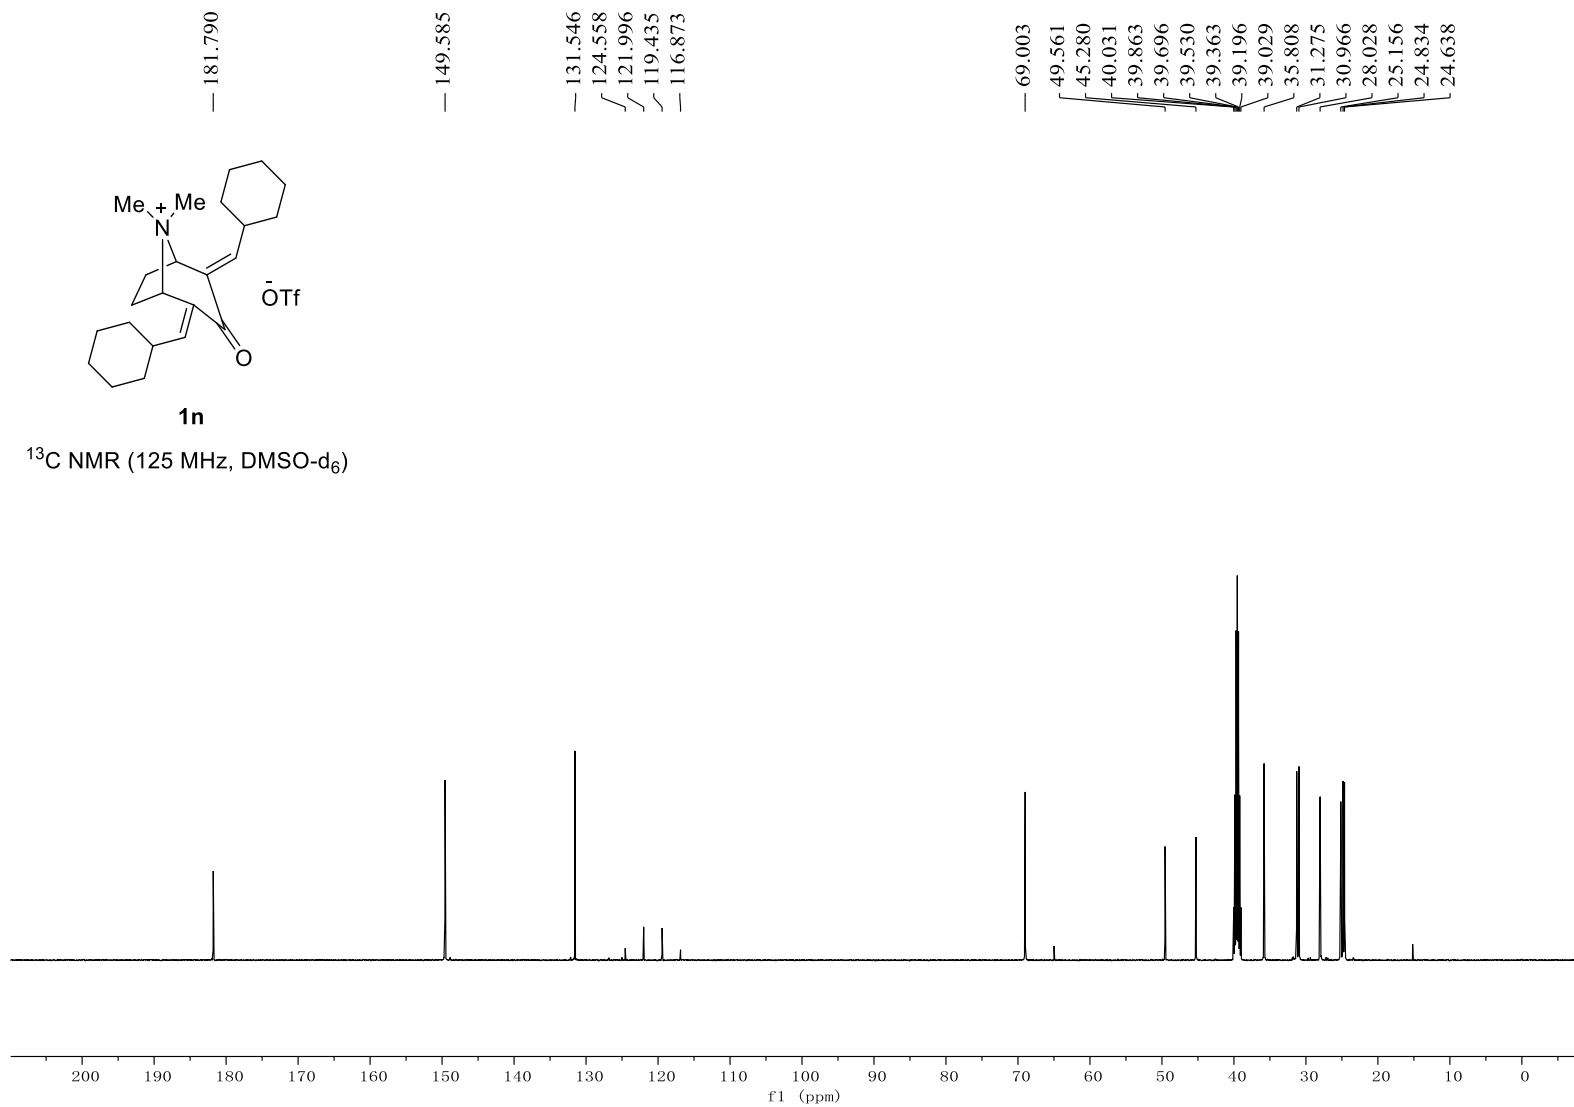

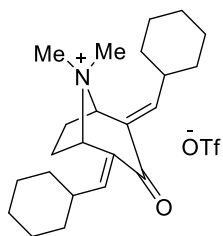

**1n**

$^{19}\text{F}$  NMR (471 MHz, DMSO- $d_6$ )

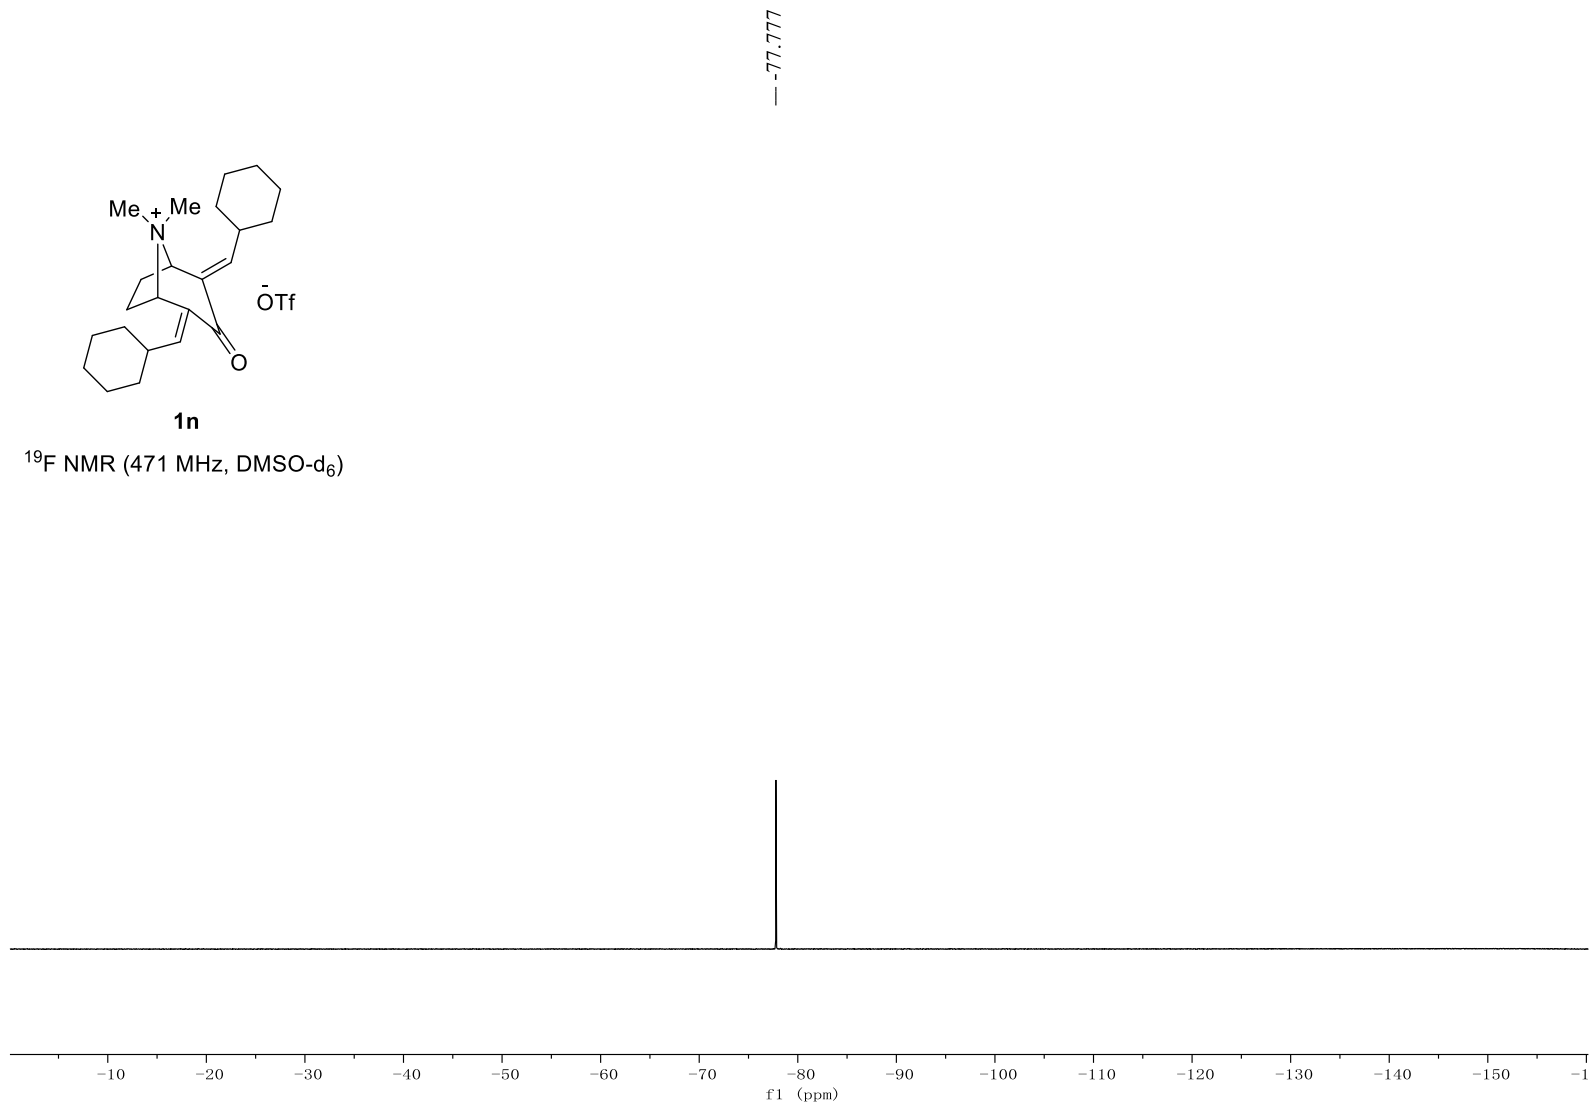



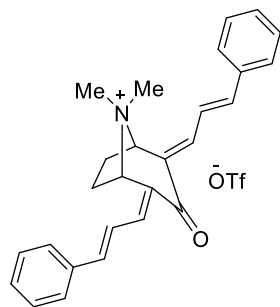

**1o**

<sup>1</sup>H NMR (500 MHz, DMSO-d<sub>6</sub>)

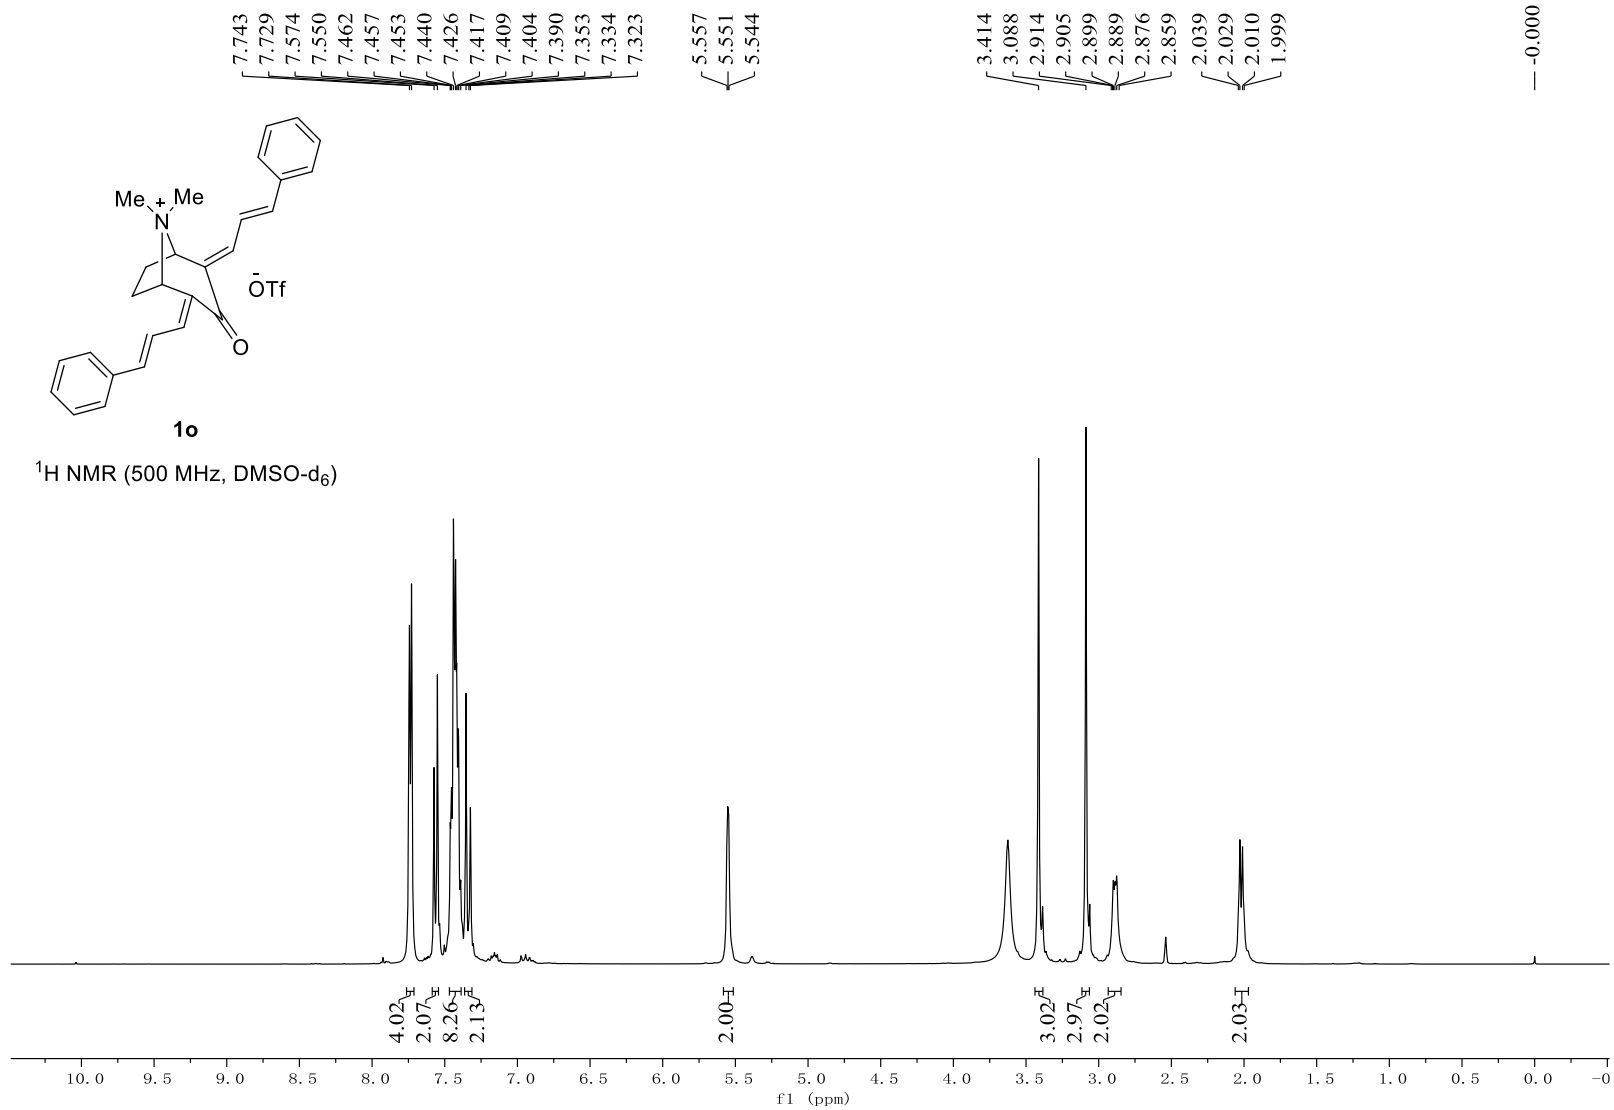

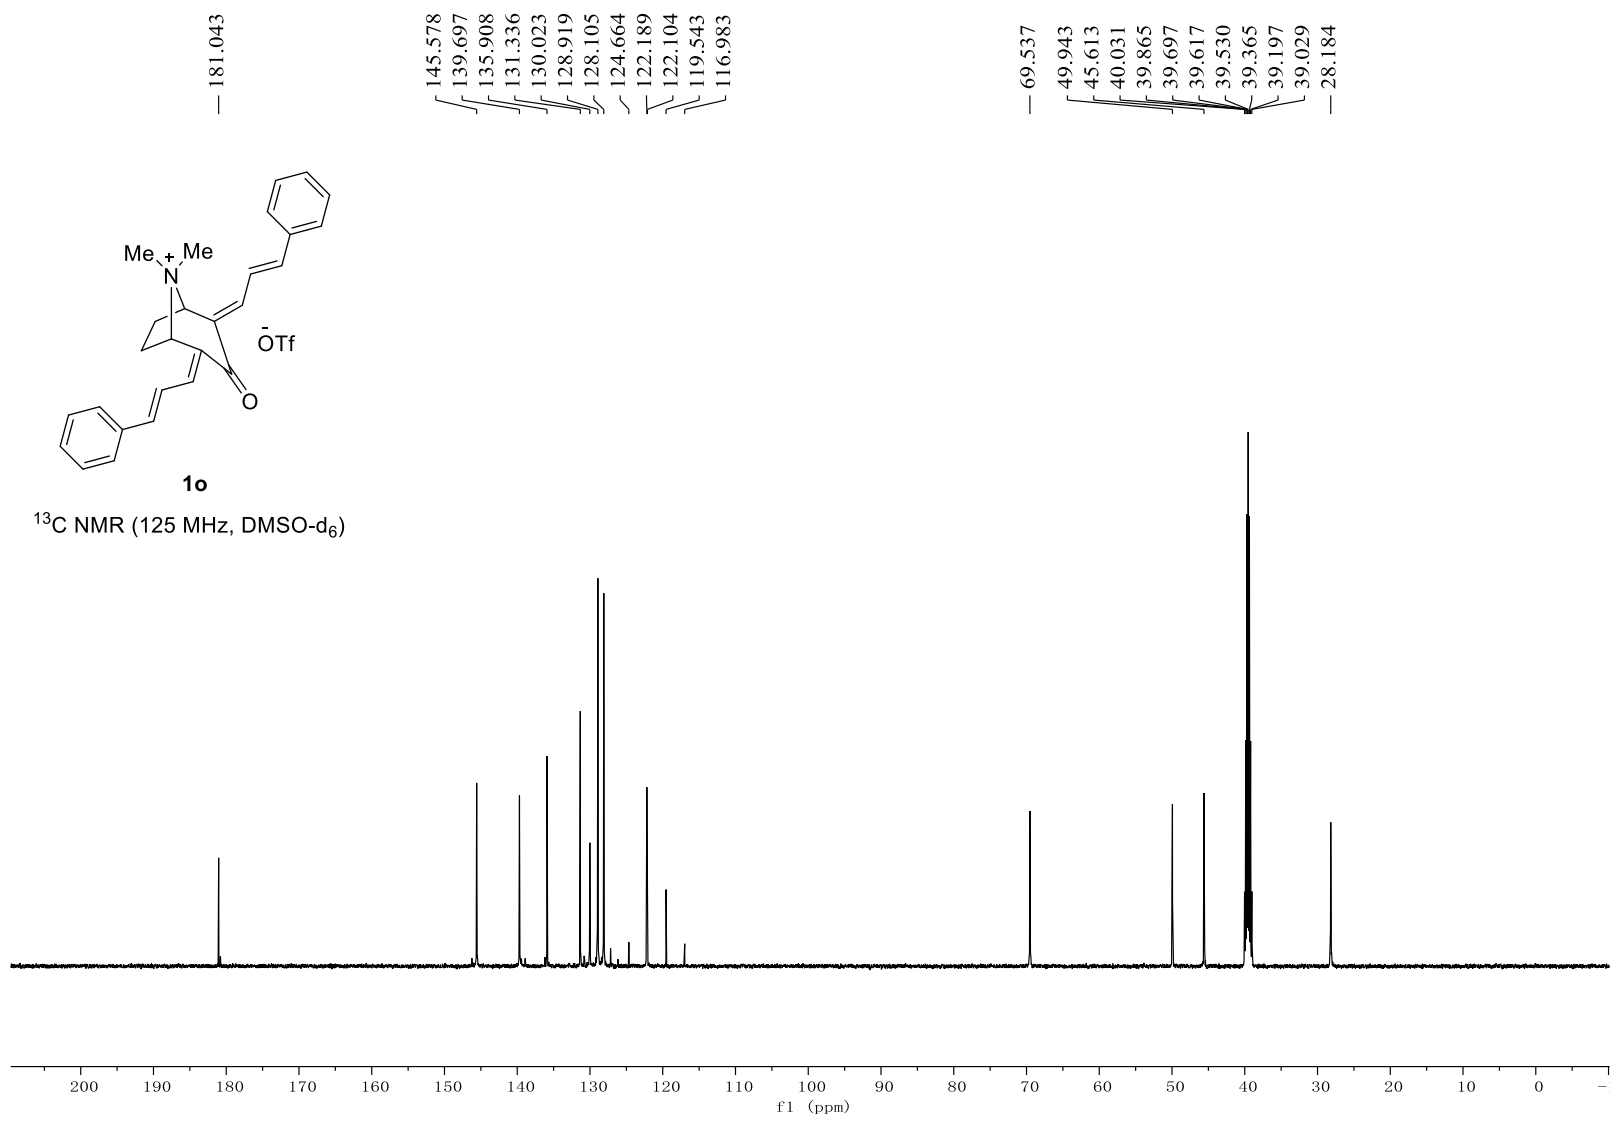

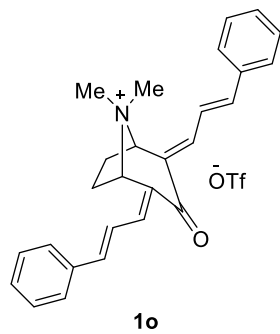

<sup>19</sup>F NMR (471 MHz, DMSO-d<sub>6</sub>)

— -77.775

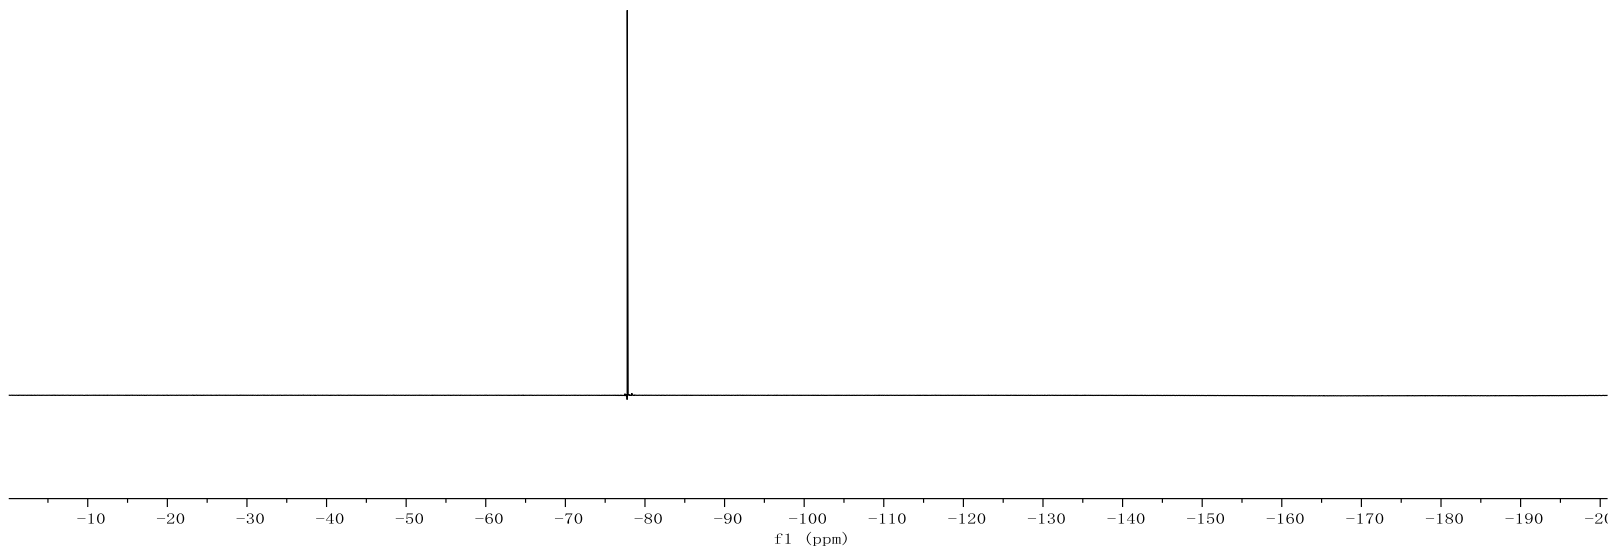

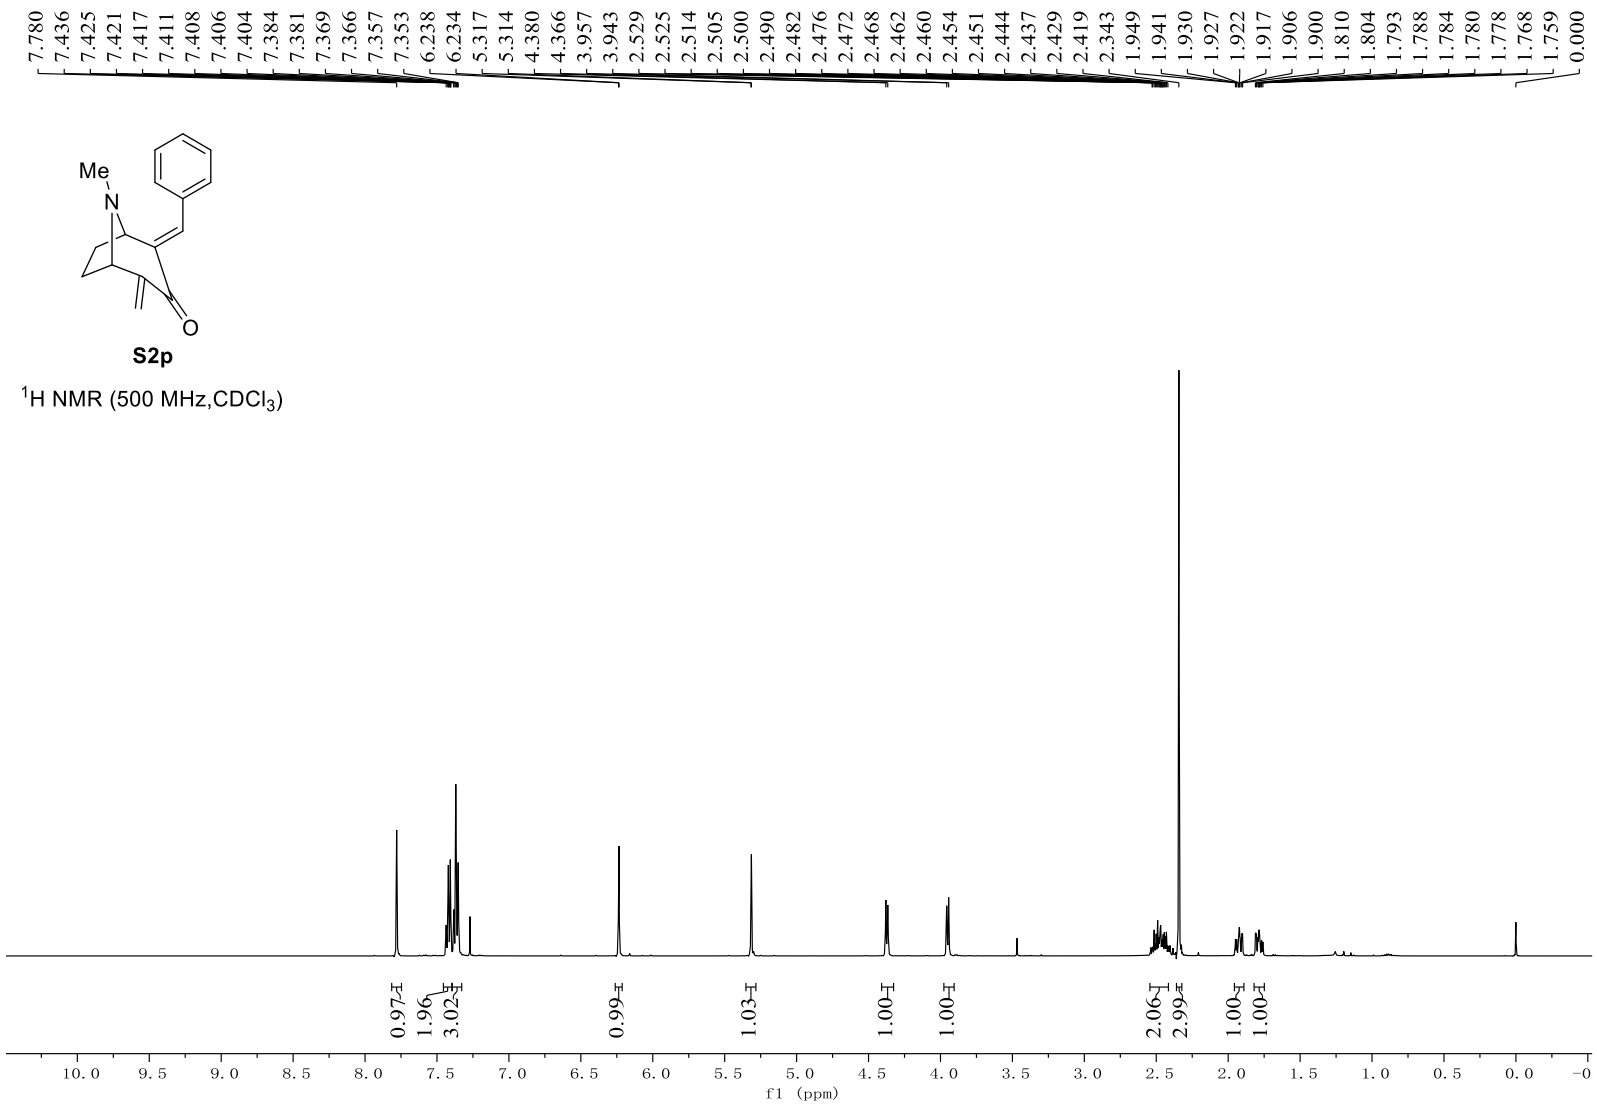

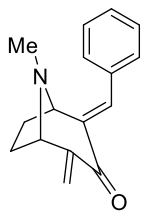

S2p

<sup>13</sup>C NMR (125 MHz, CDCl<sub>3</sub>)

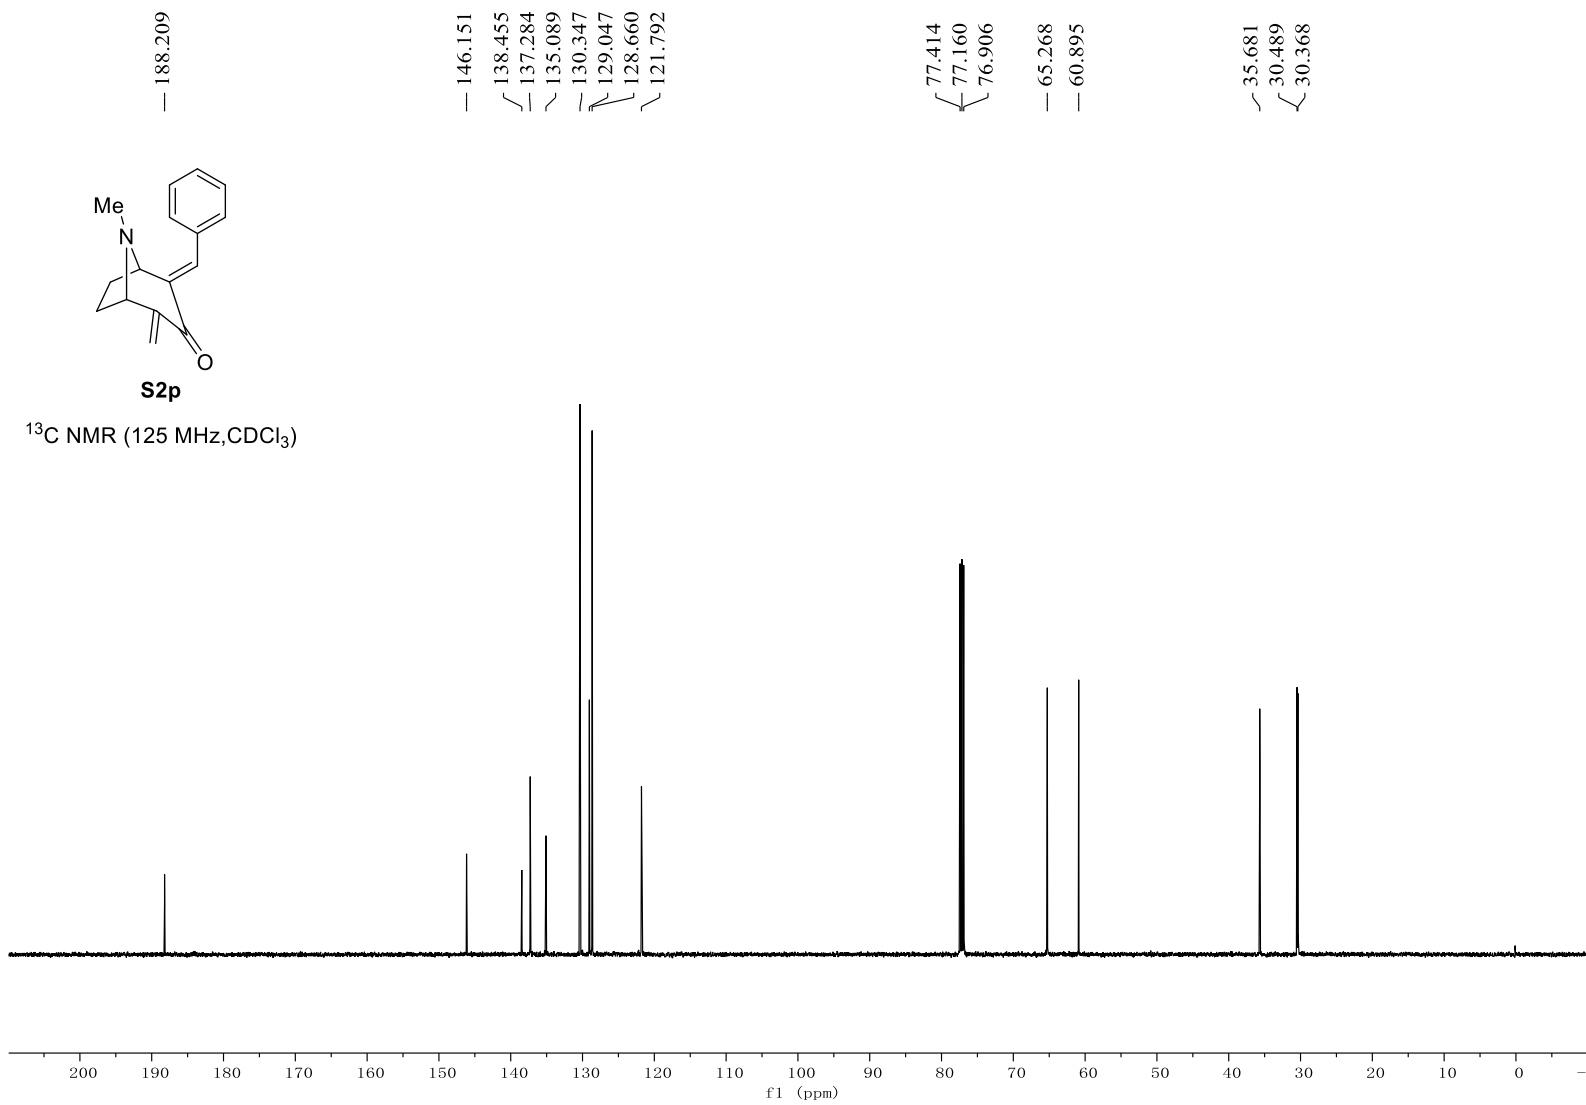

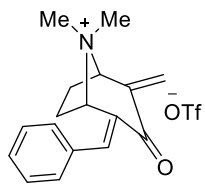

**1p**

<sup>1</sup>H NMR (500 MHz, DMSO-d<sub>6</sub>)

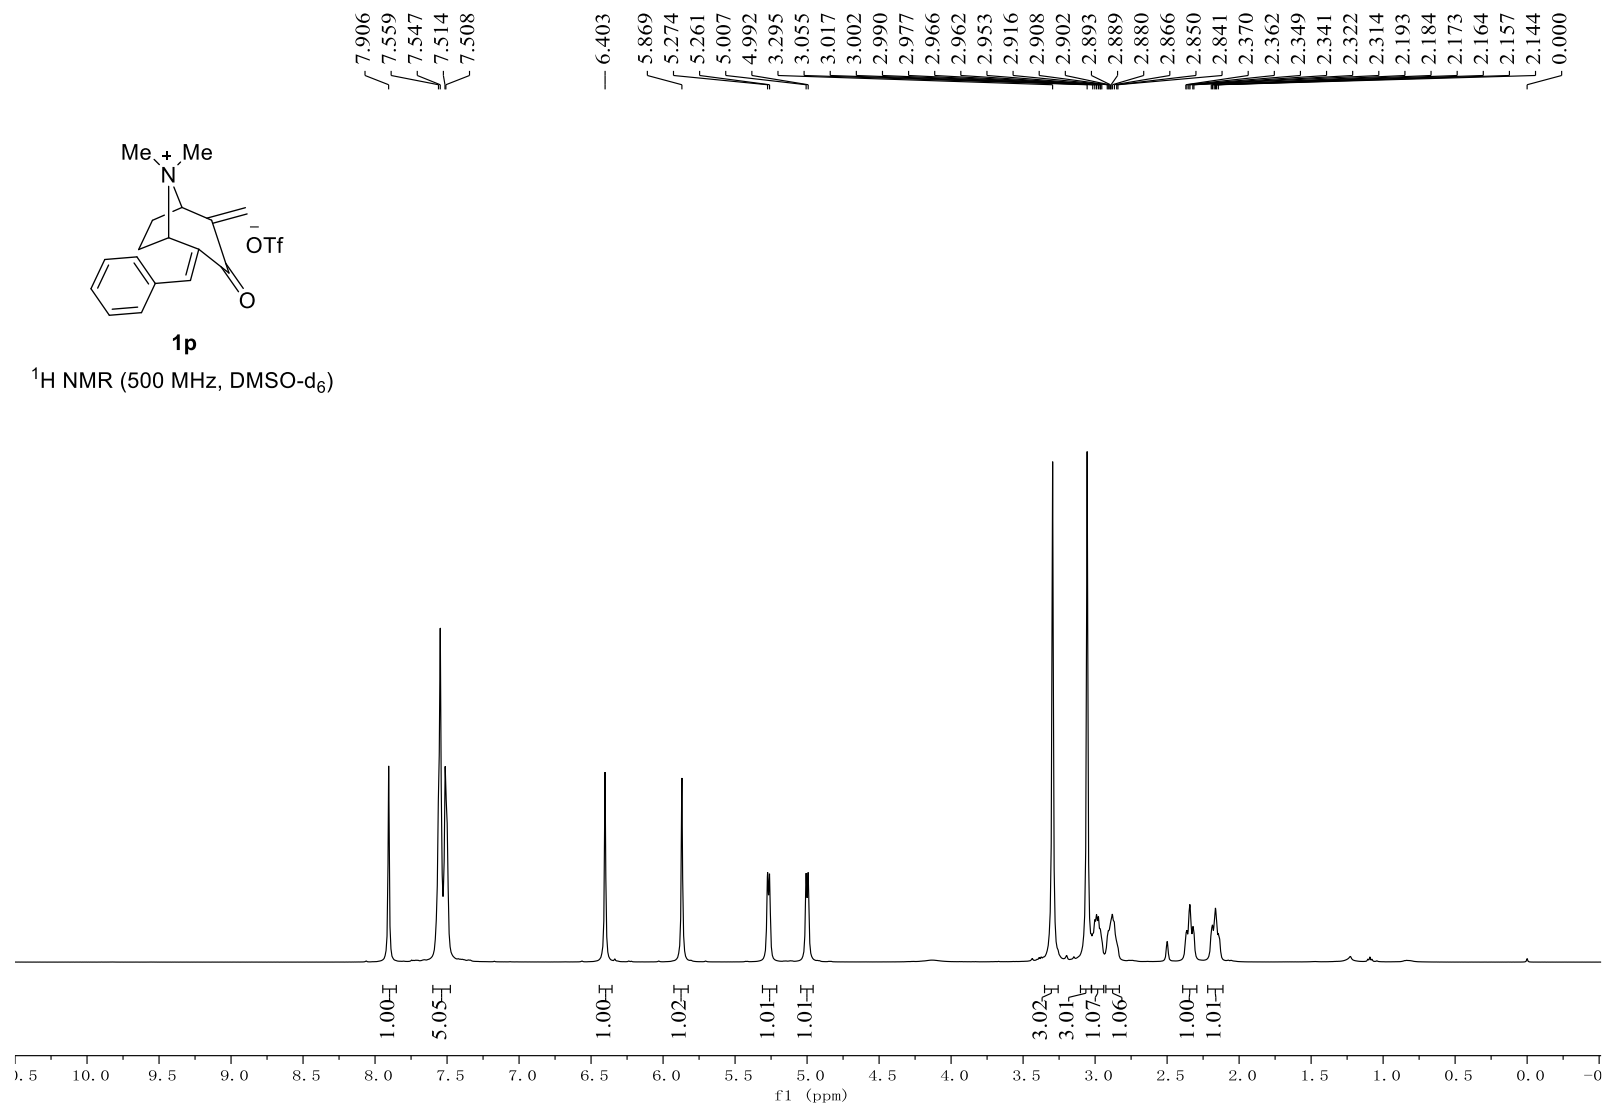

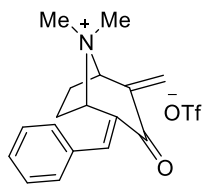

**1p**

<sup>13</sup>C NMR (125 MHz, DMSO-d<sub>6</sub>)

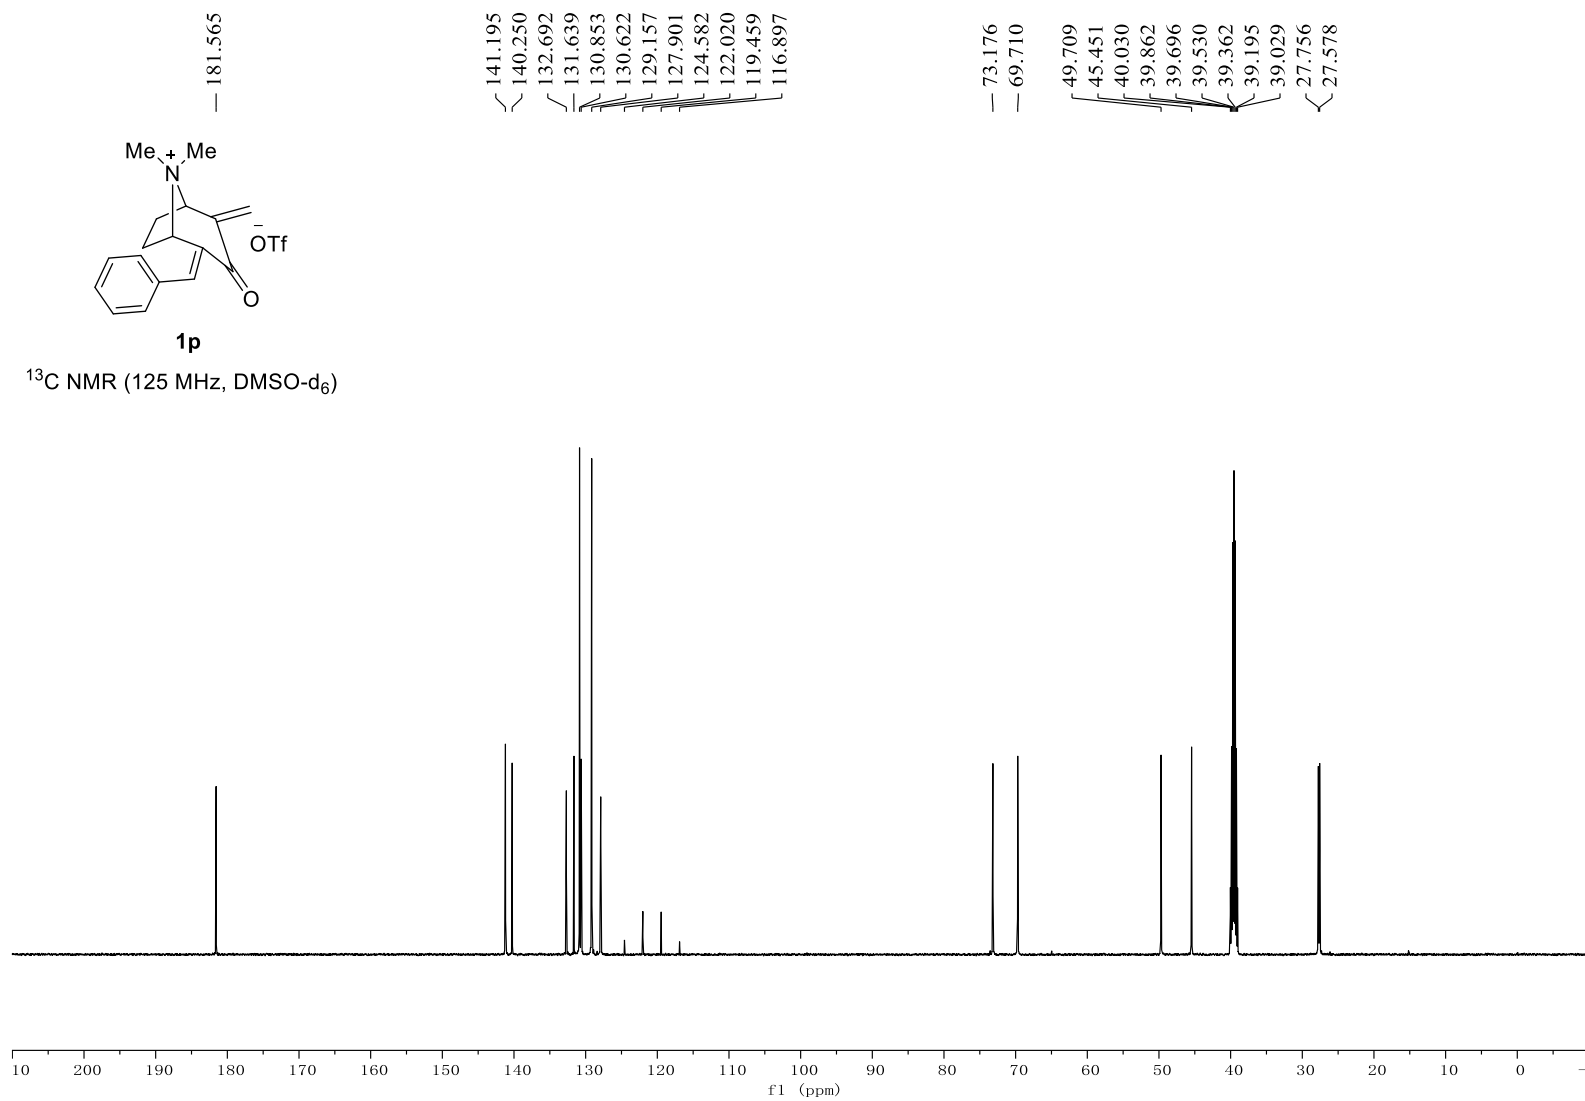

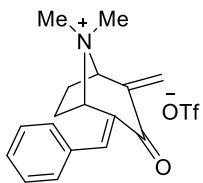

**1p**

<sup>19</sup>F NMR (470 MHz, DMSO-d<sub>6</sub>)

— -77.734

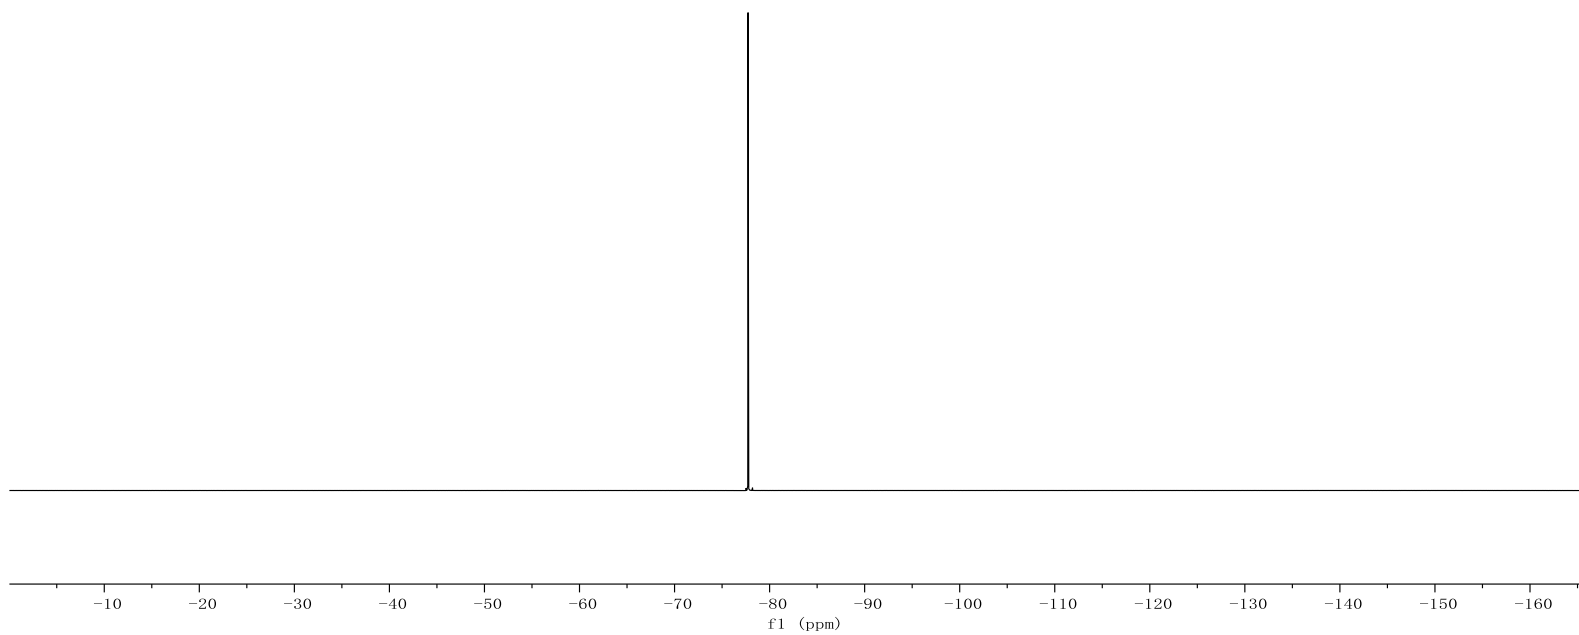



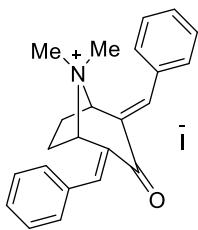

**1ab**

<sup>1</sup>H NMR (400 MHz, DMSO-d<sub>6</sub>)

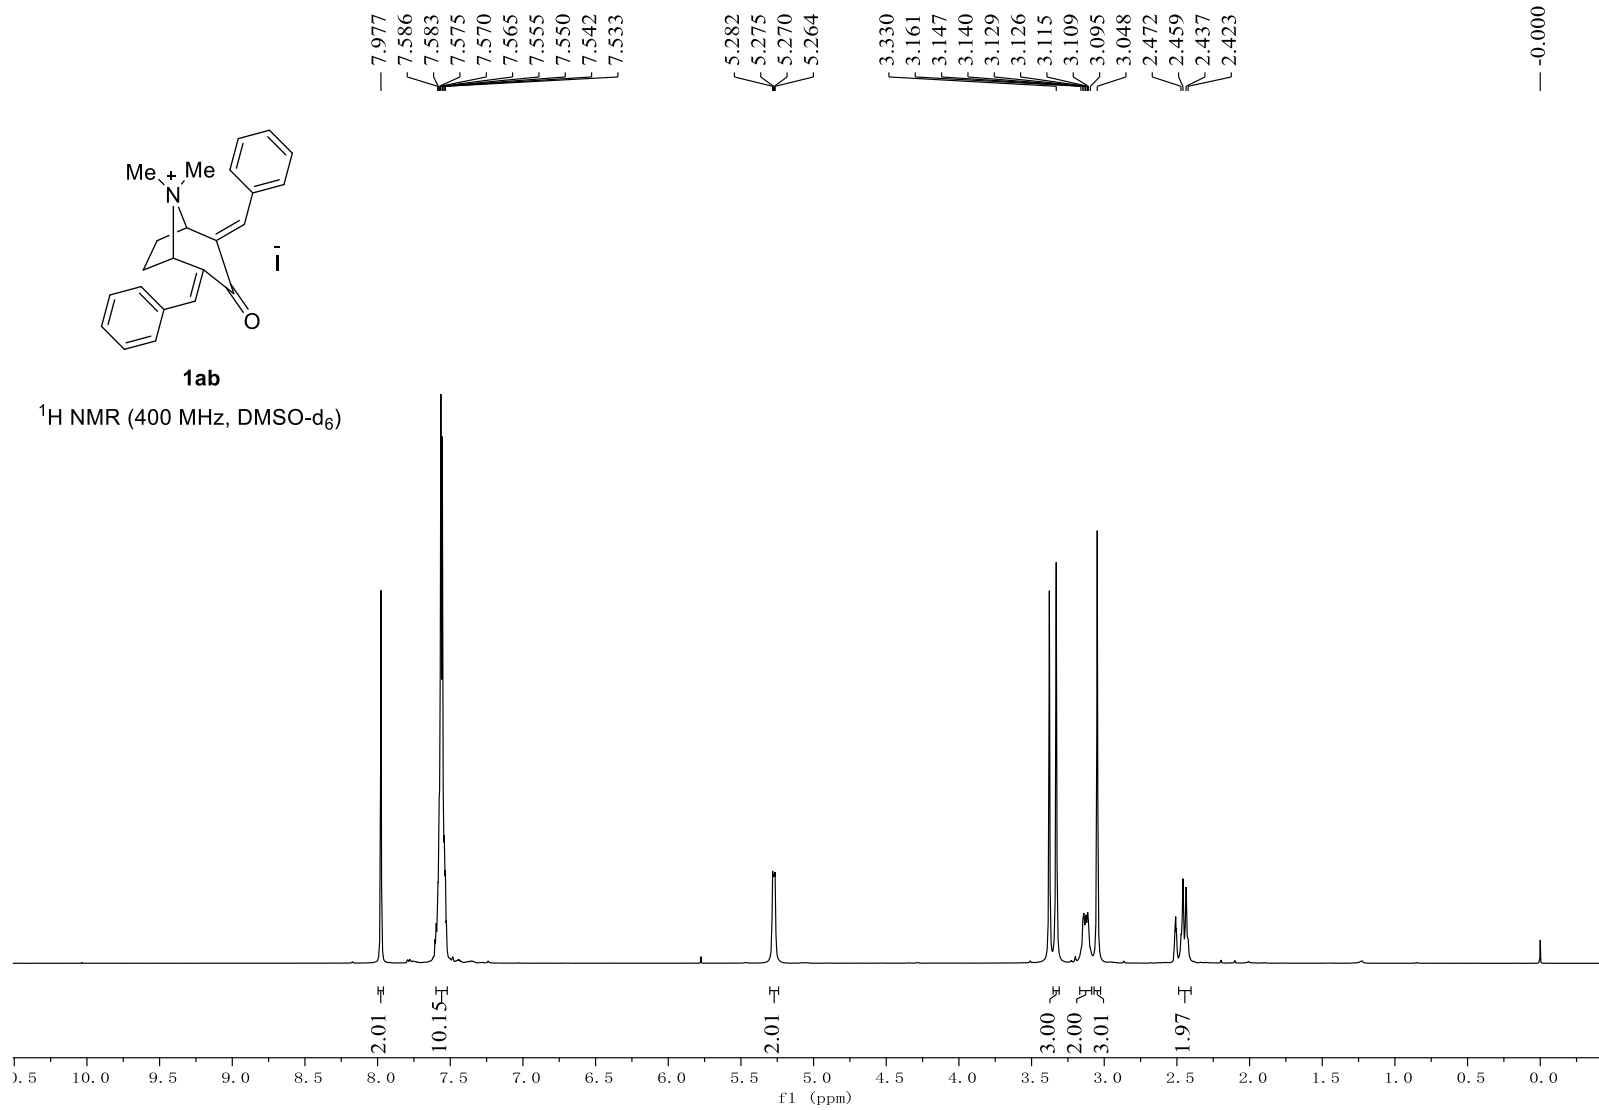

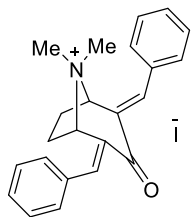

**1ab**

<sup>13</sup>C NMR (100 MHz, DMSO-d<sub>6</sub>)

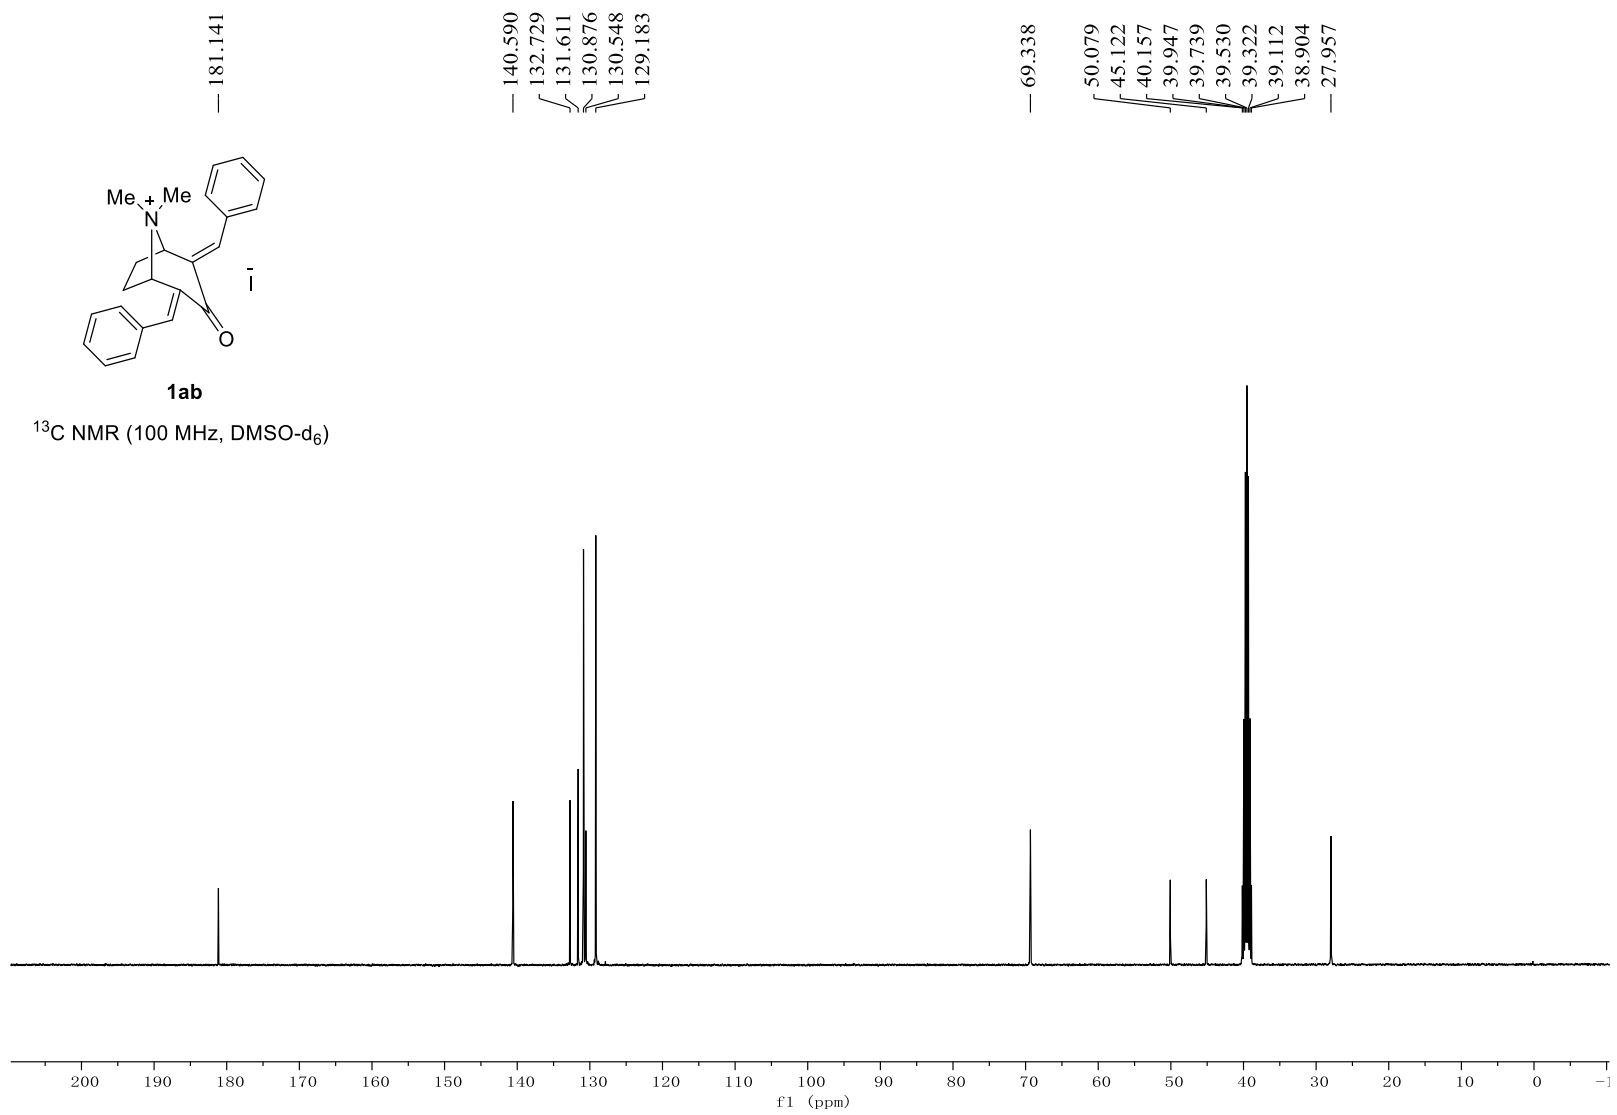

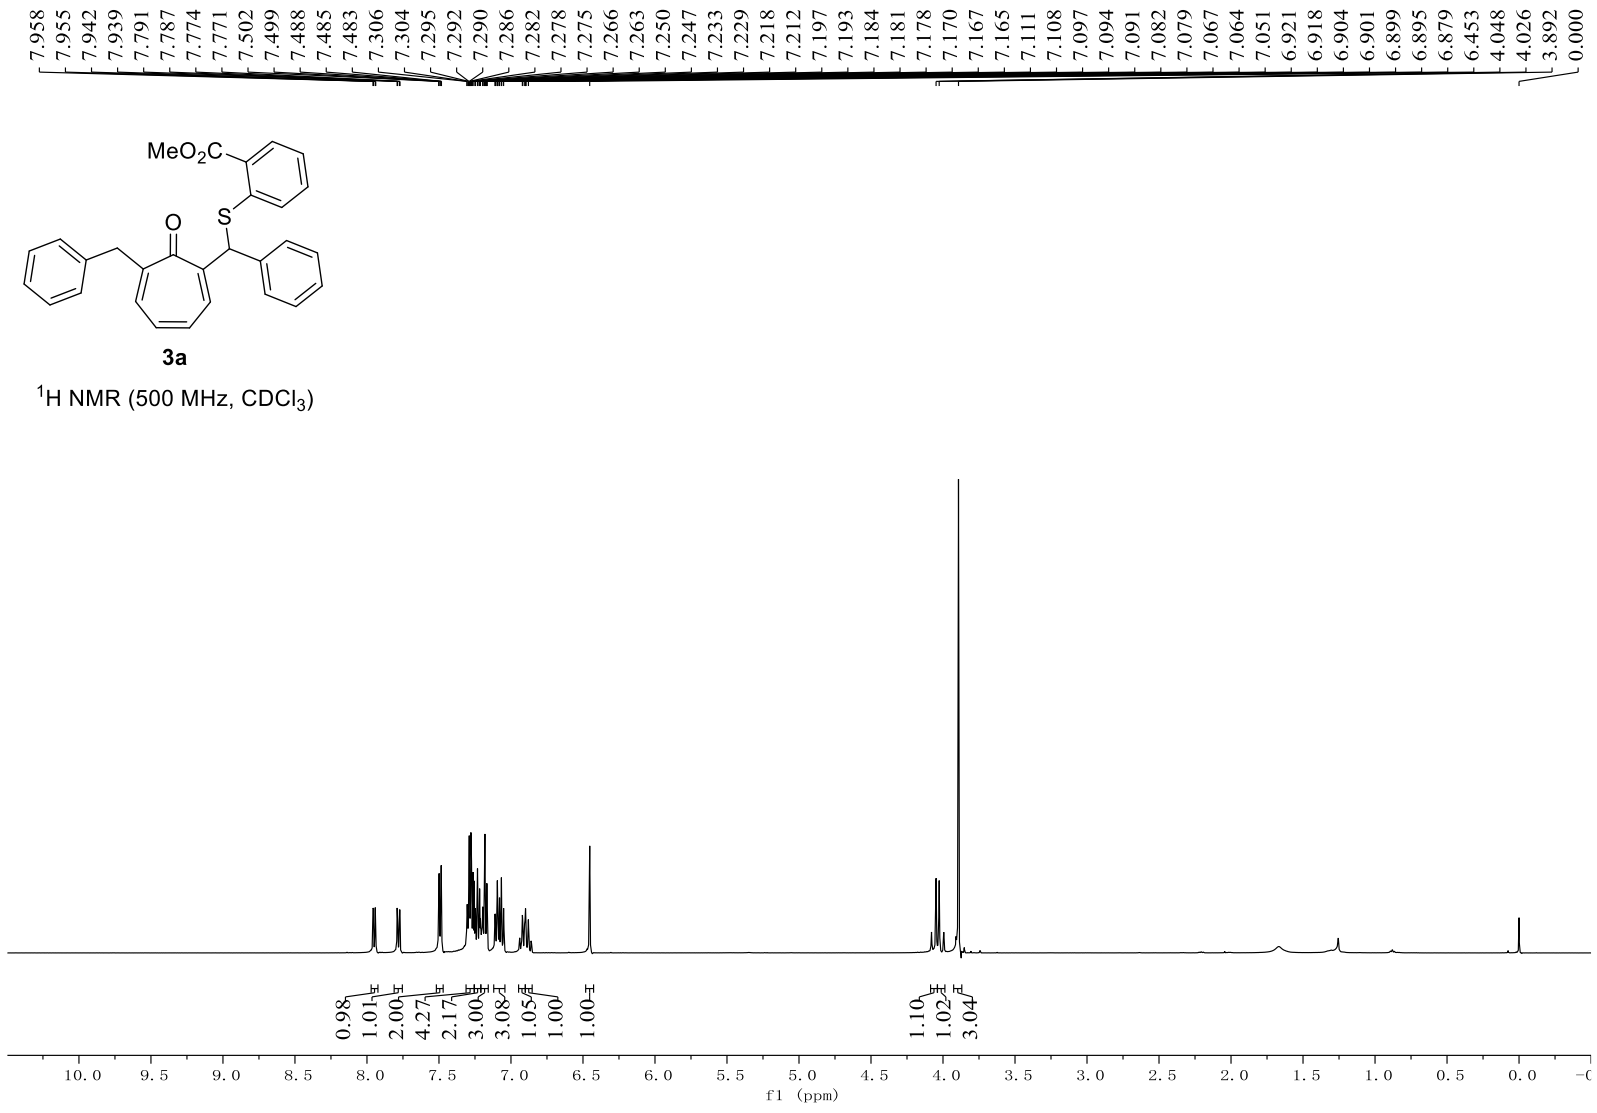

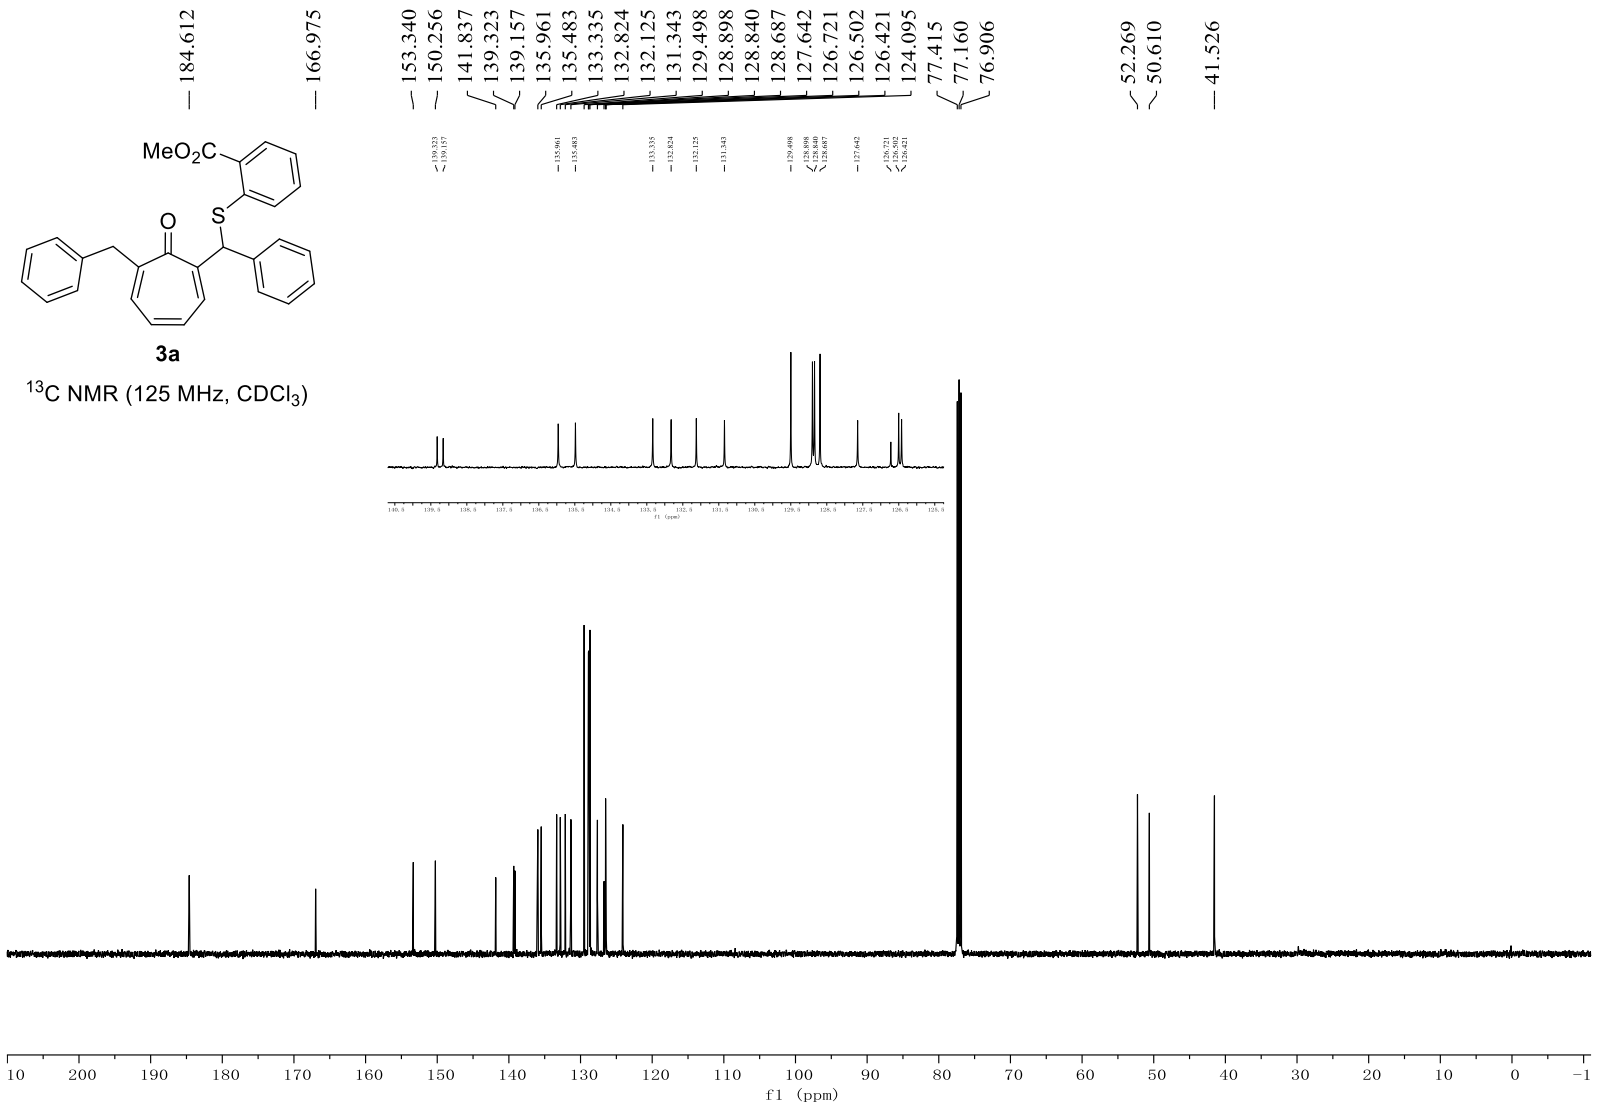

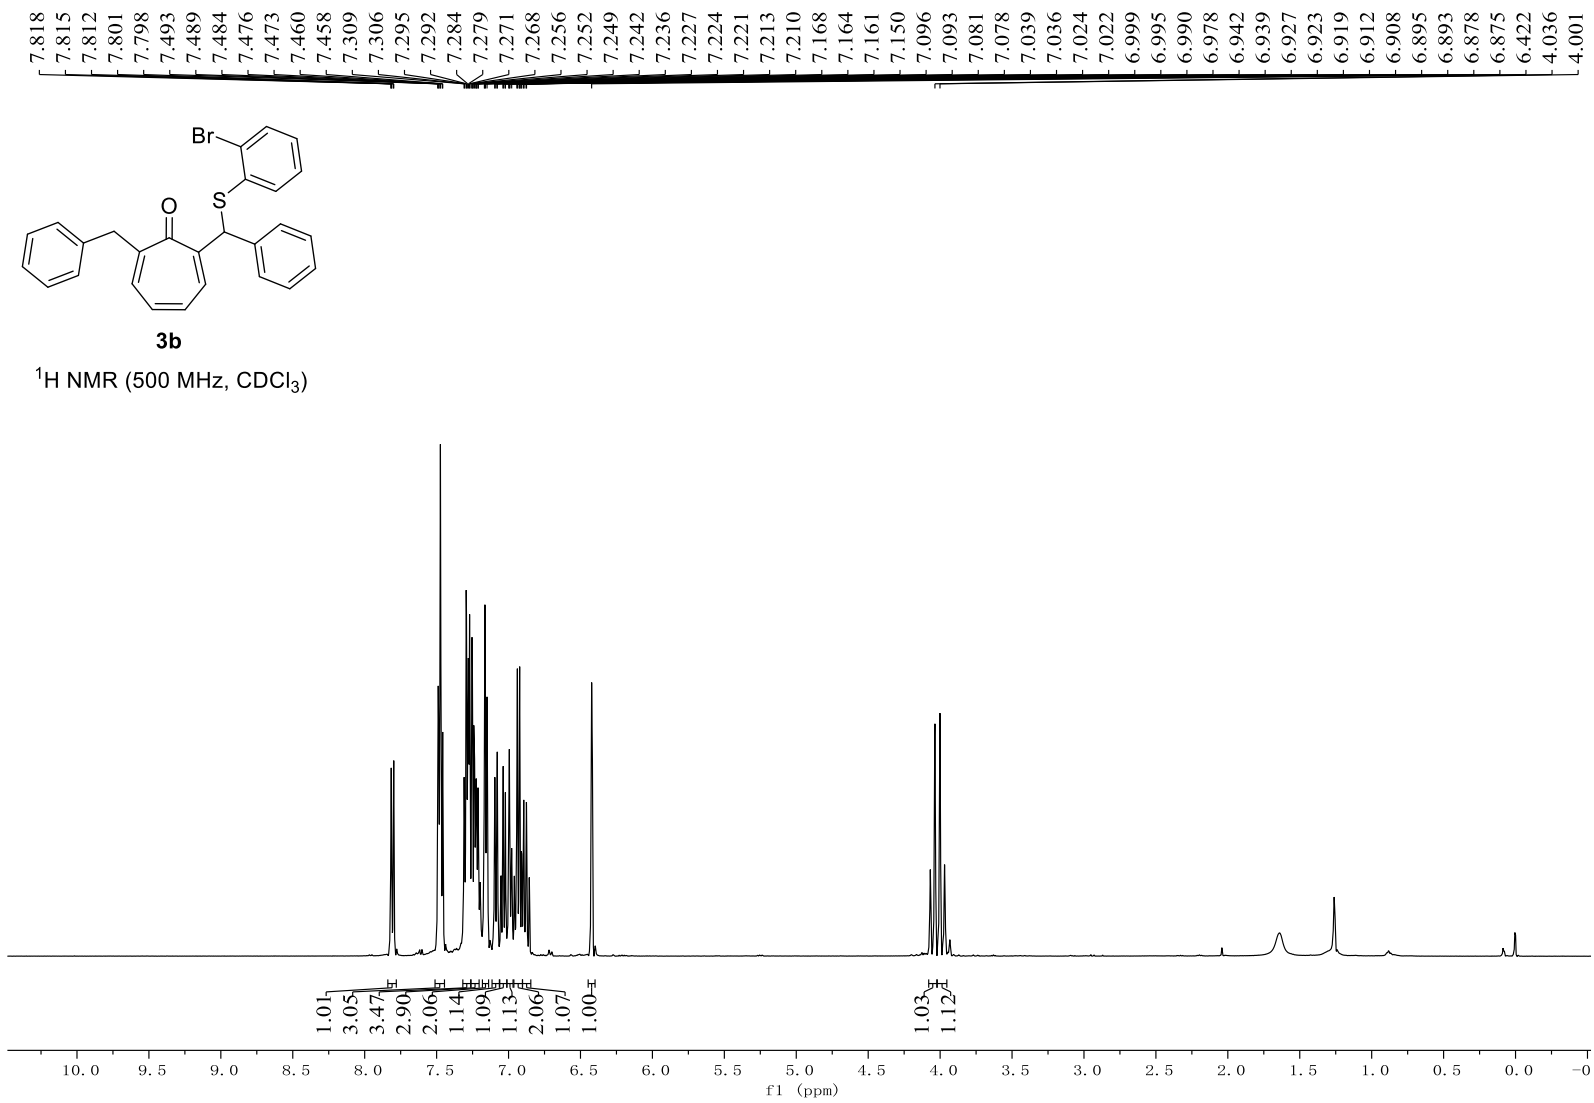

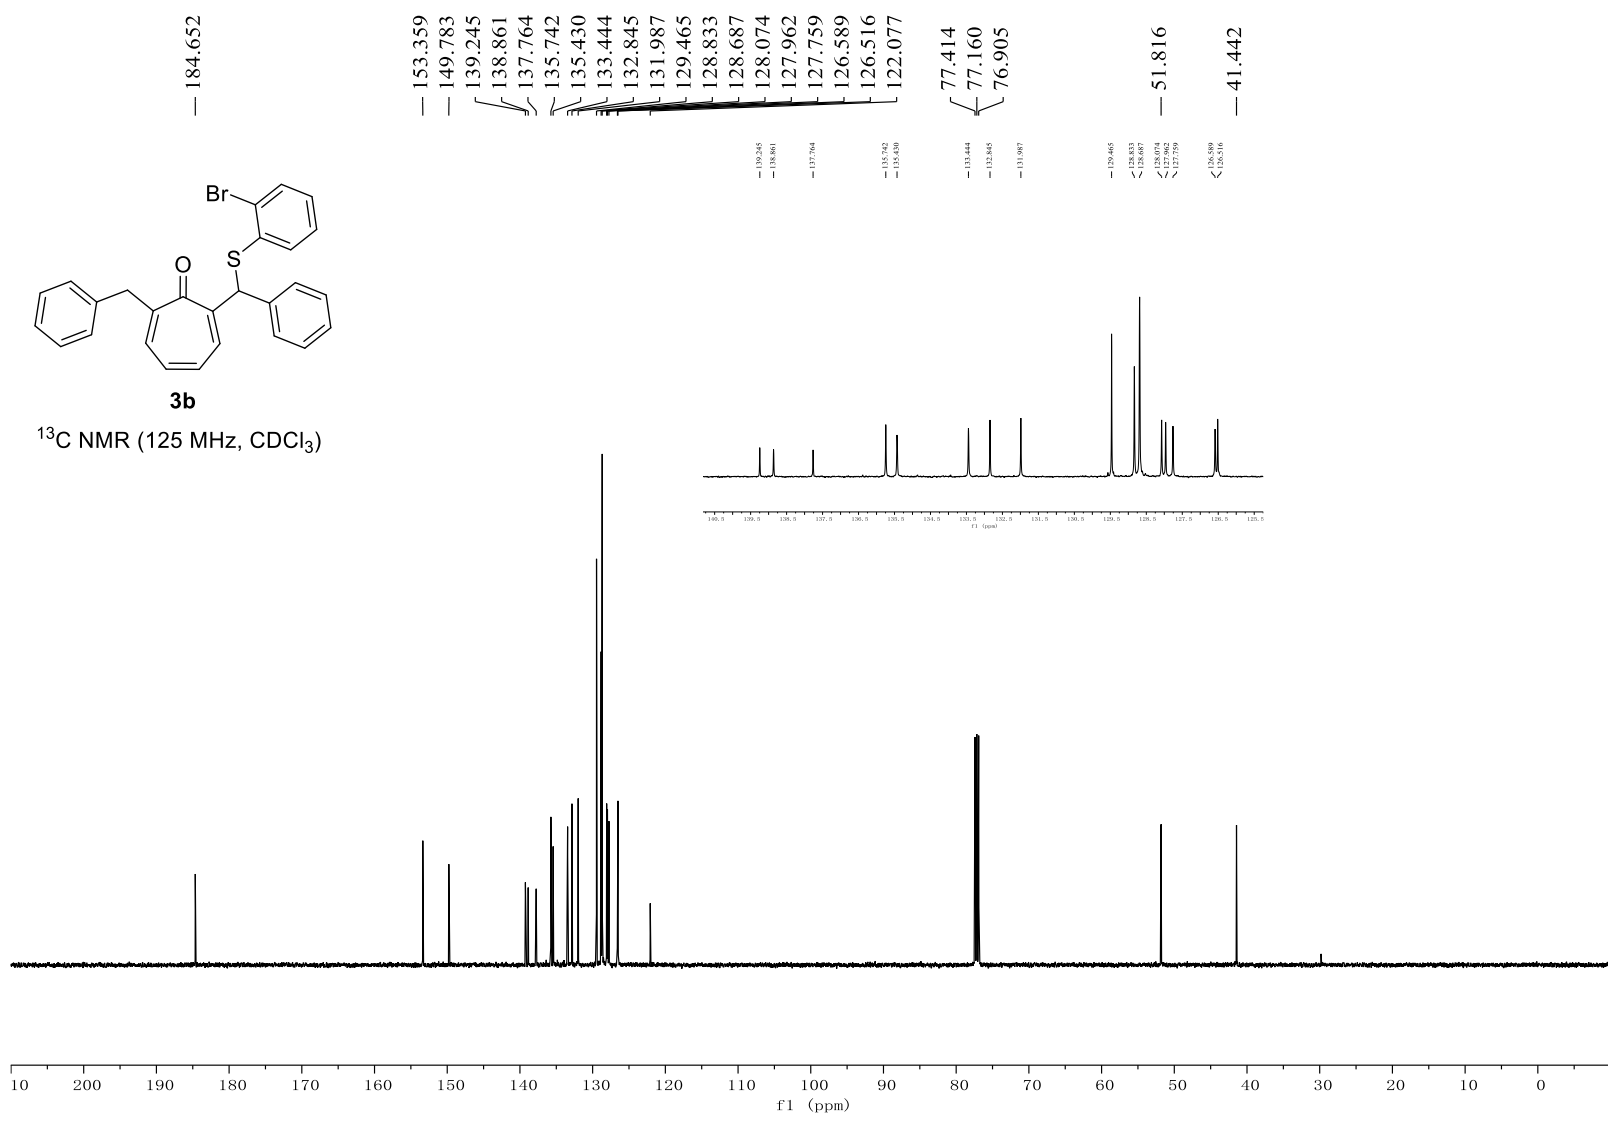

7.689  
7.686  
7.672  
7.669  
7.474  
7.471  
7.460  
7.457  
7.455  
7.386  
7.382  
7.378  
7.310  
7.308  
7.294  
7.290  
7.286  
7.282  
7.278  
7.272  
7.269  
7.260  
7.257  
7.248  
7.245  
7.243  
7.236  
7.234  
7.231  
7.226  
7.224  
7.220  
7.218  
7.216  
7.214  
7.209  
7.169  
7.166  
7.155  
7.152  
7.150  
7.142  
7.140  
7.127  
7.124  
7.121  
7.070  
7.068  
7.053  
7.051  
7.014  
6.999  
6.983  
6.925  
6.883  
6.880  
6.863  
6.330  
4.019  
4.007

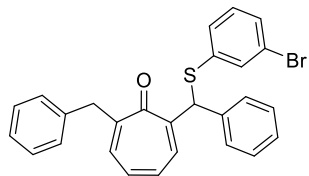

**3c**

<sup>1</sup>H NMR (500 MHz, CDCl<sub>3</sub>)

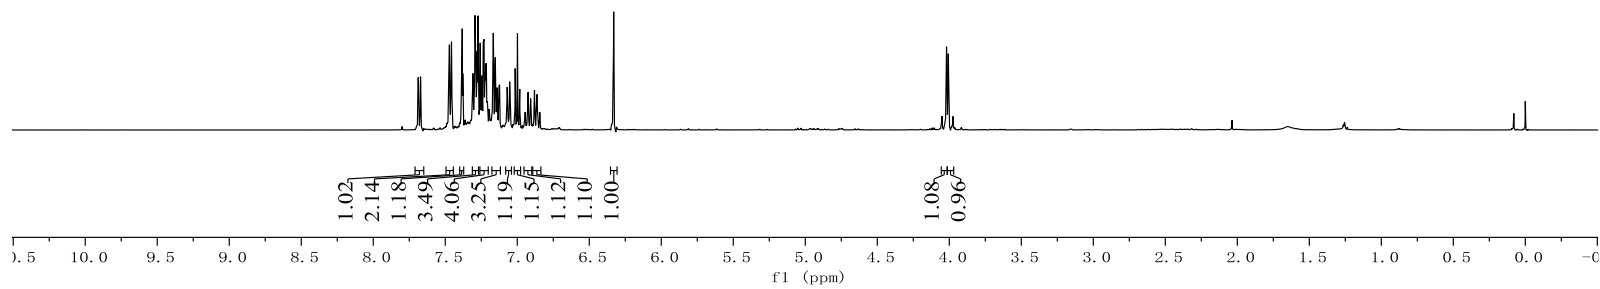

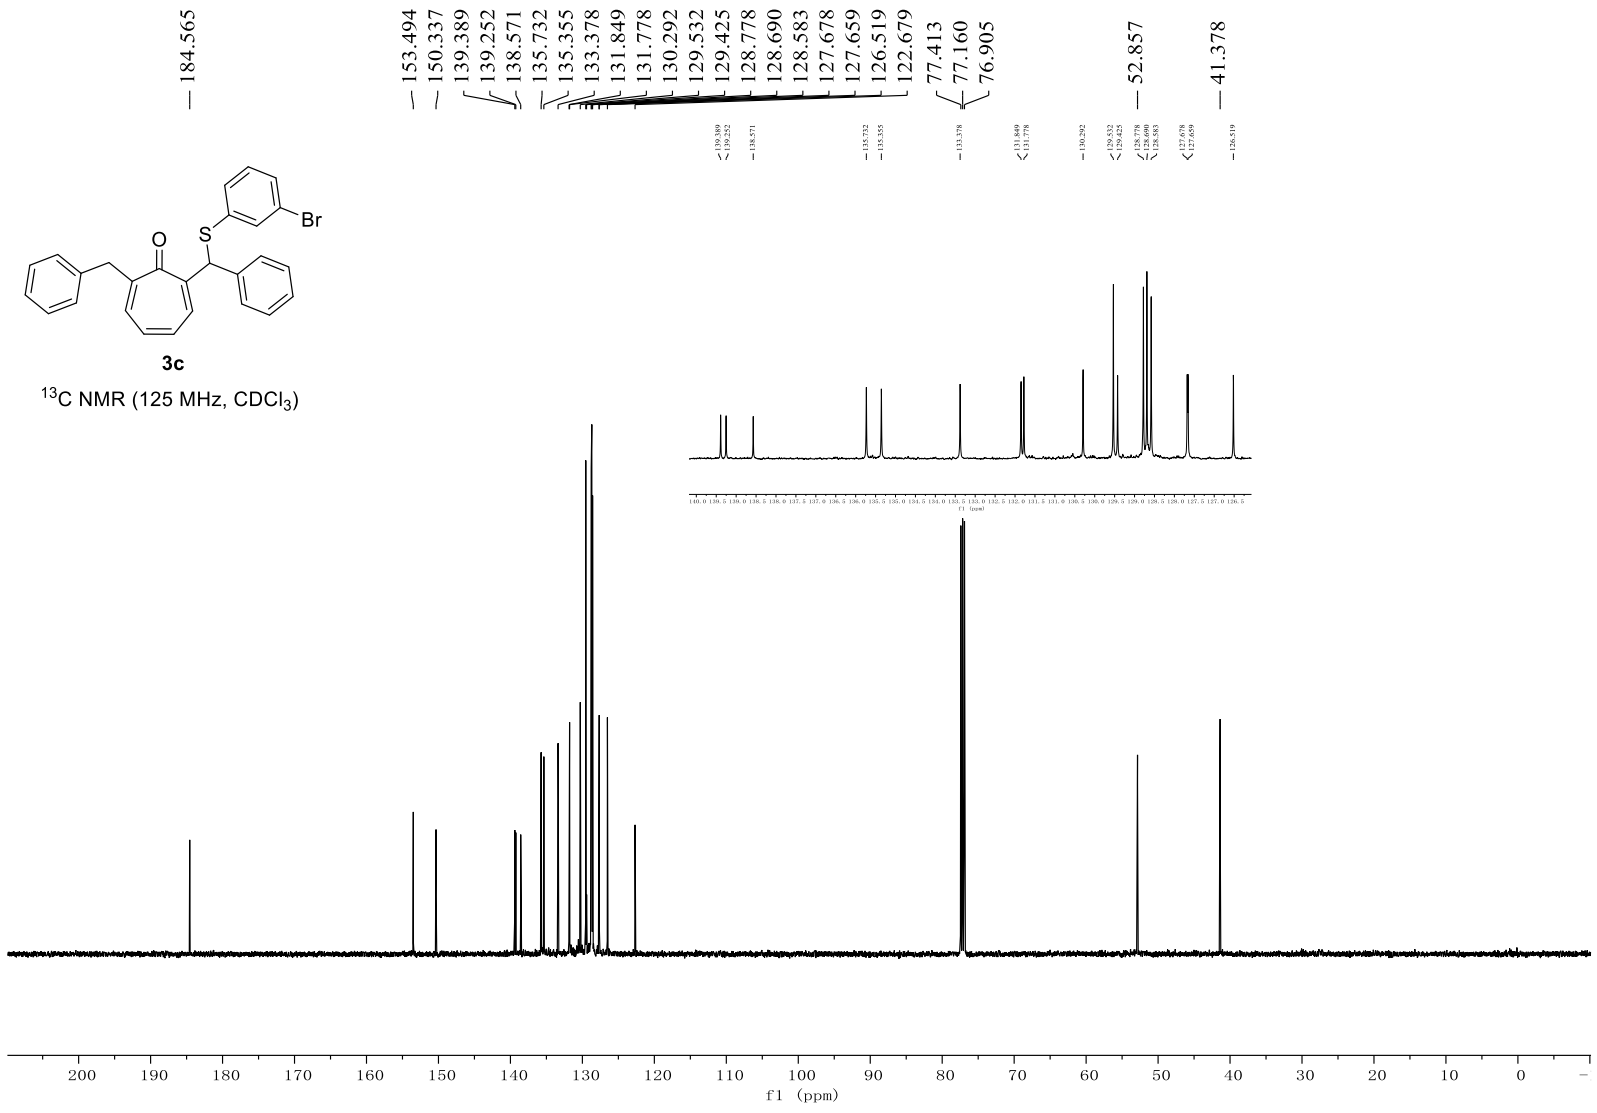



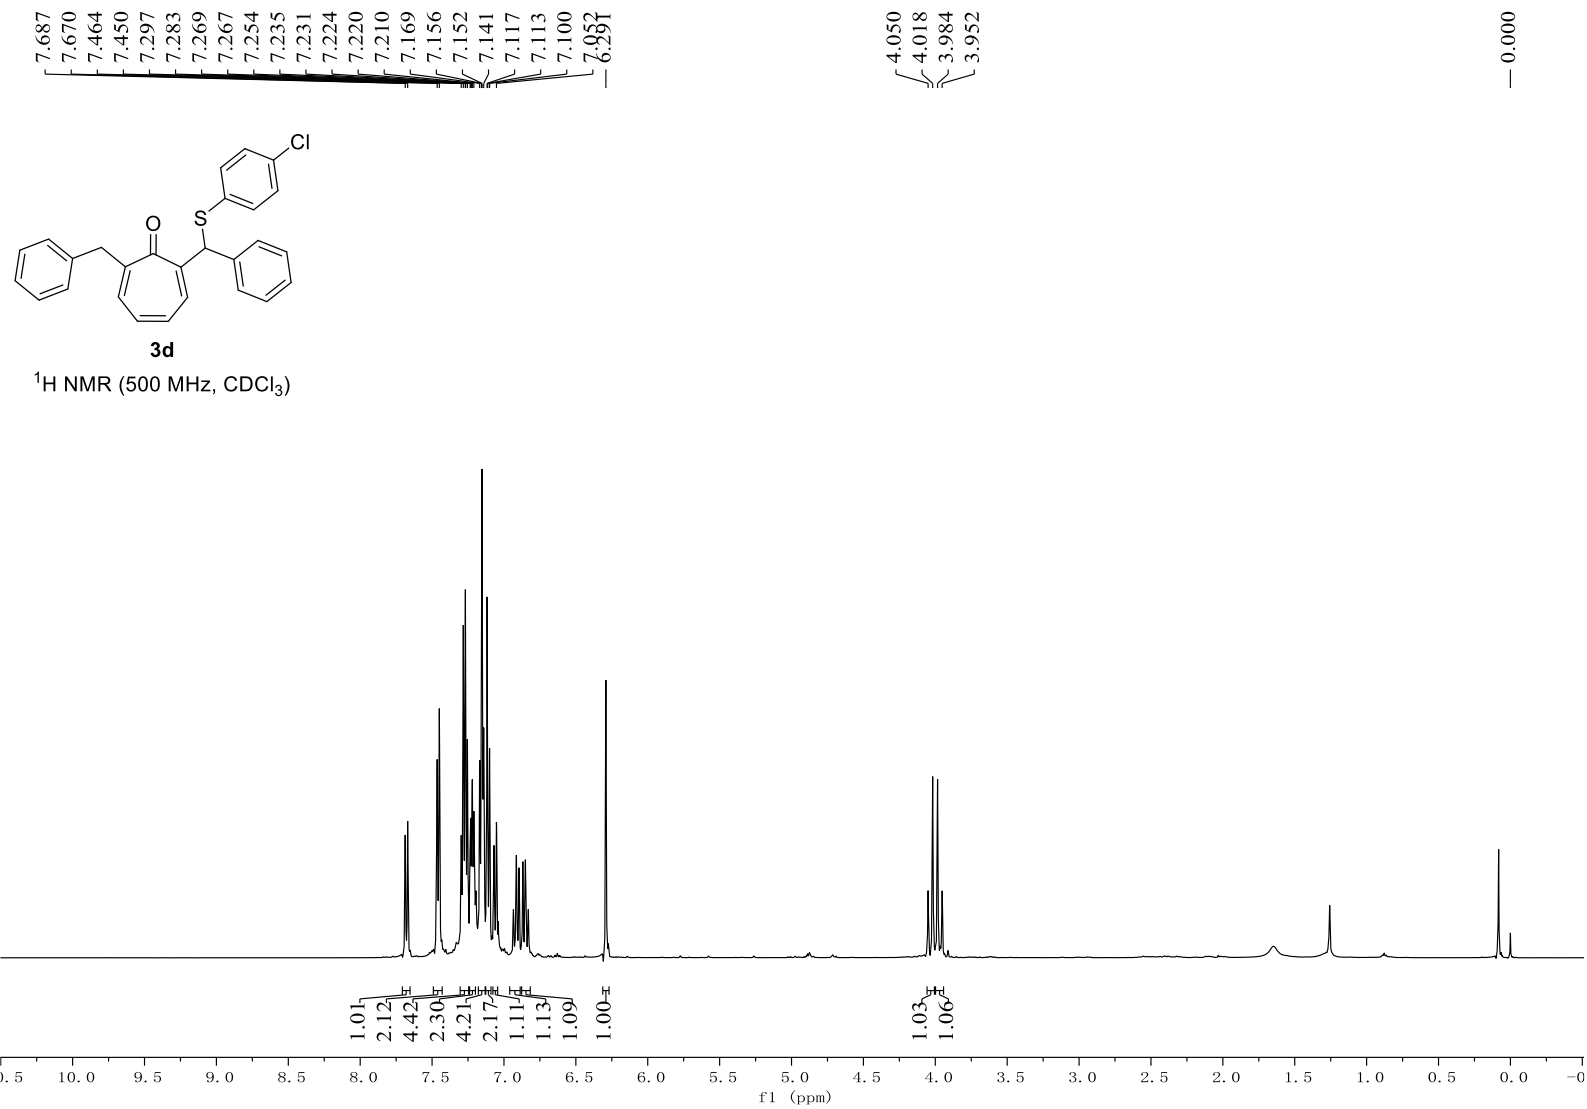

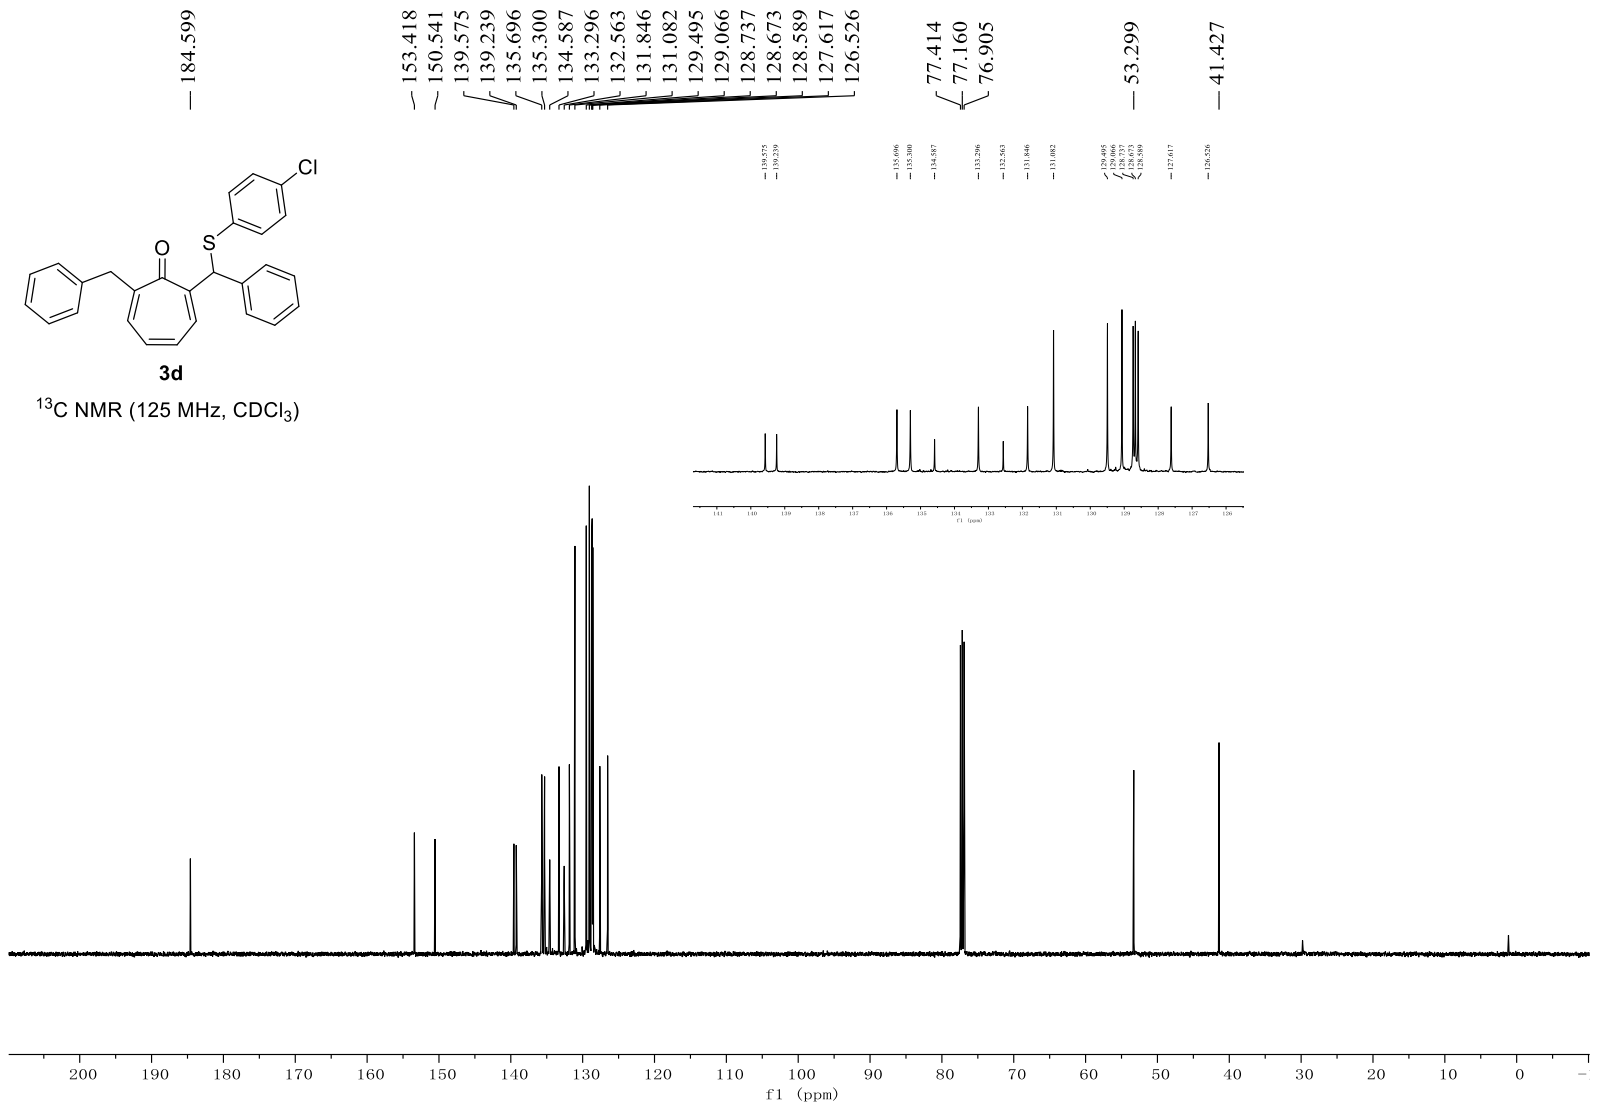

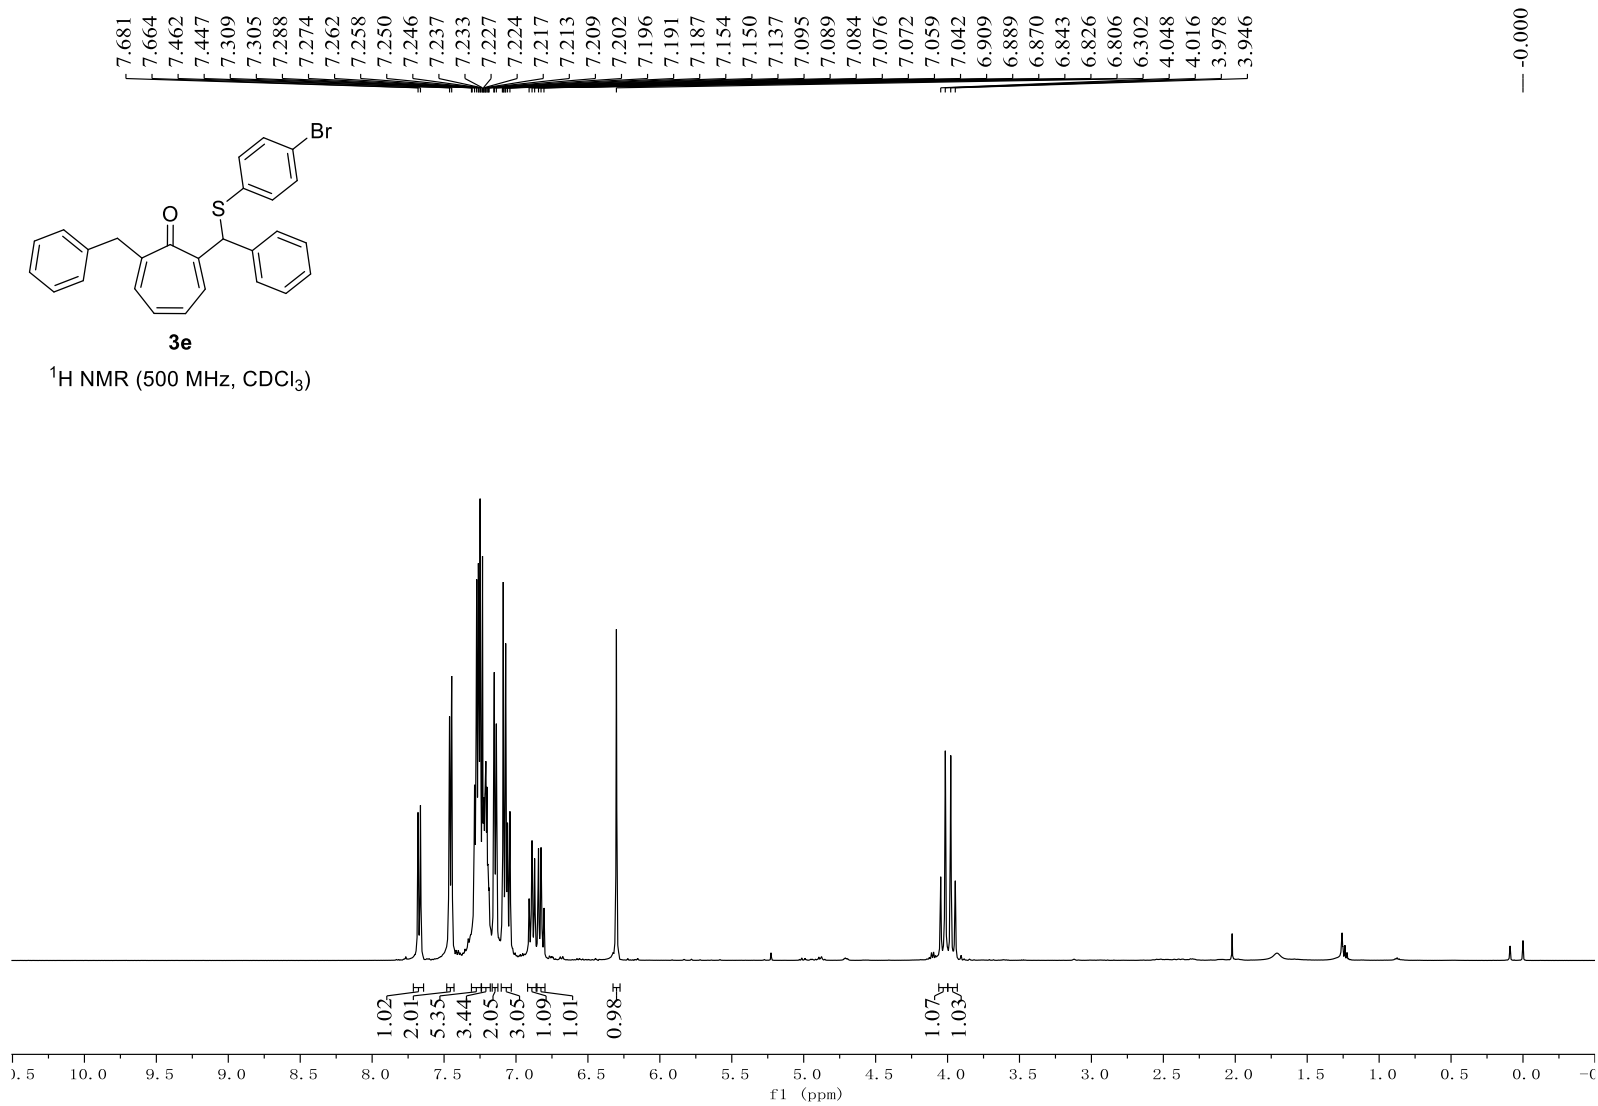

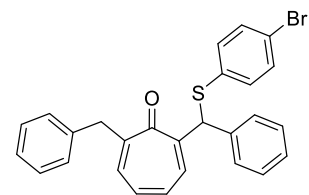

**3e**

<sup>13</sup>C NMR (125 MHz, CDCl<sub>3</sub>)

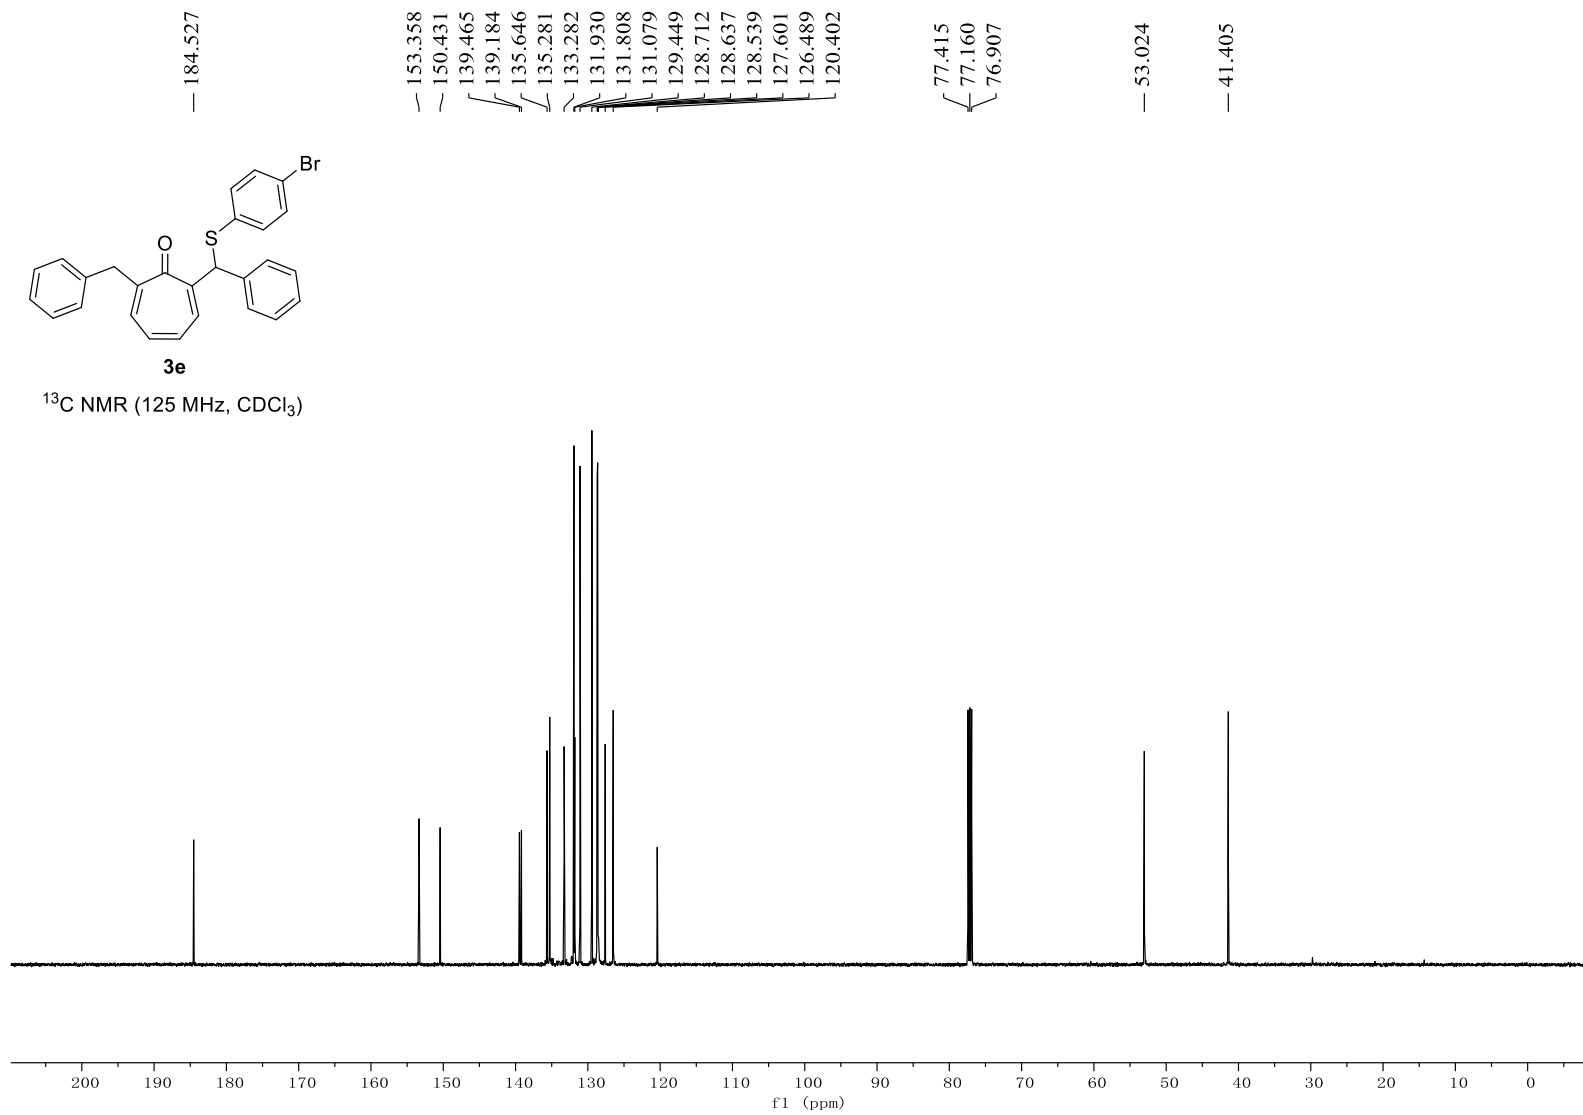

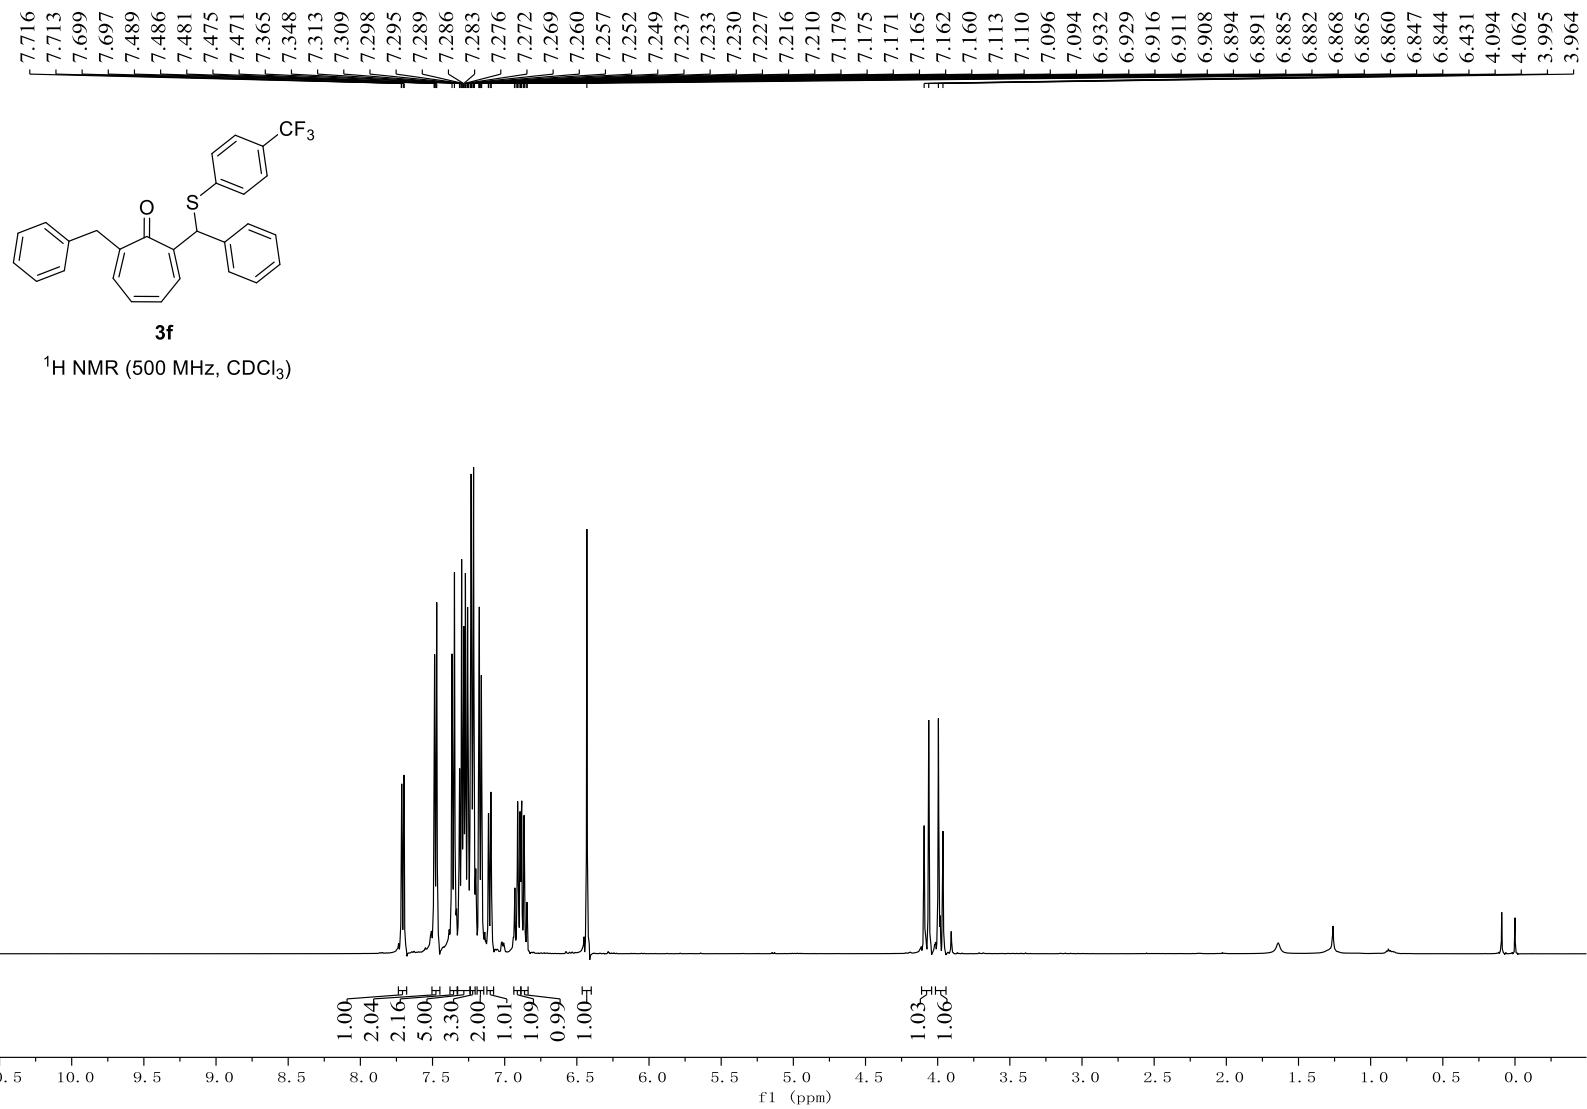

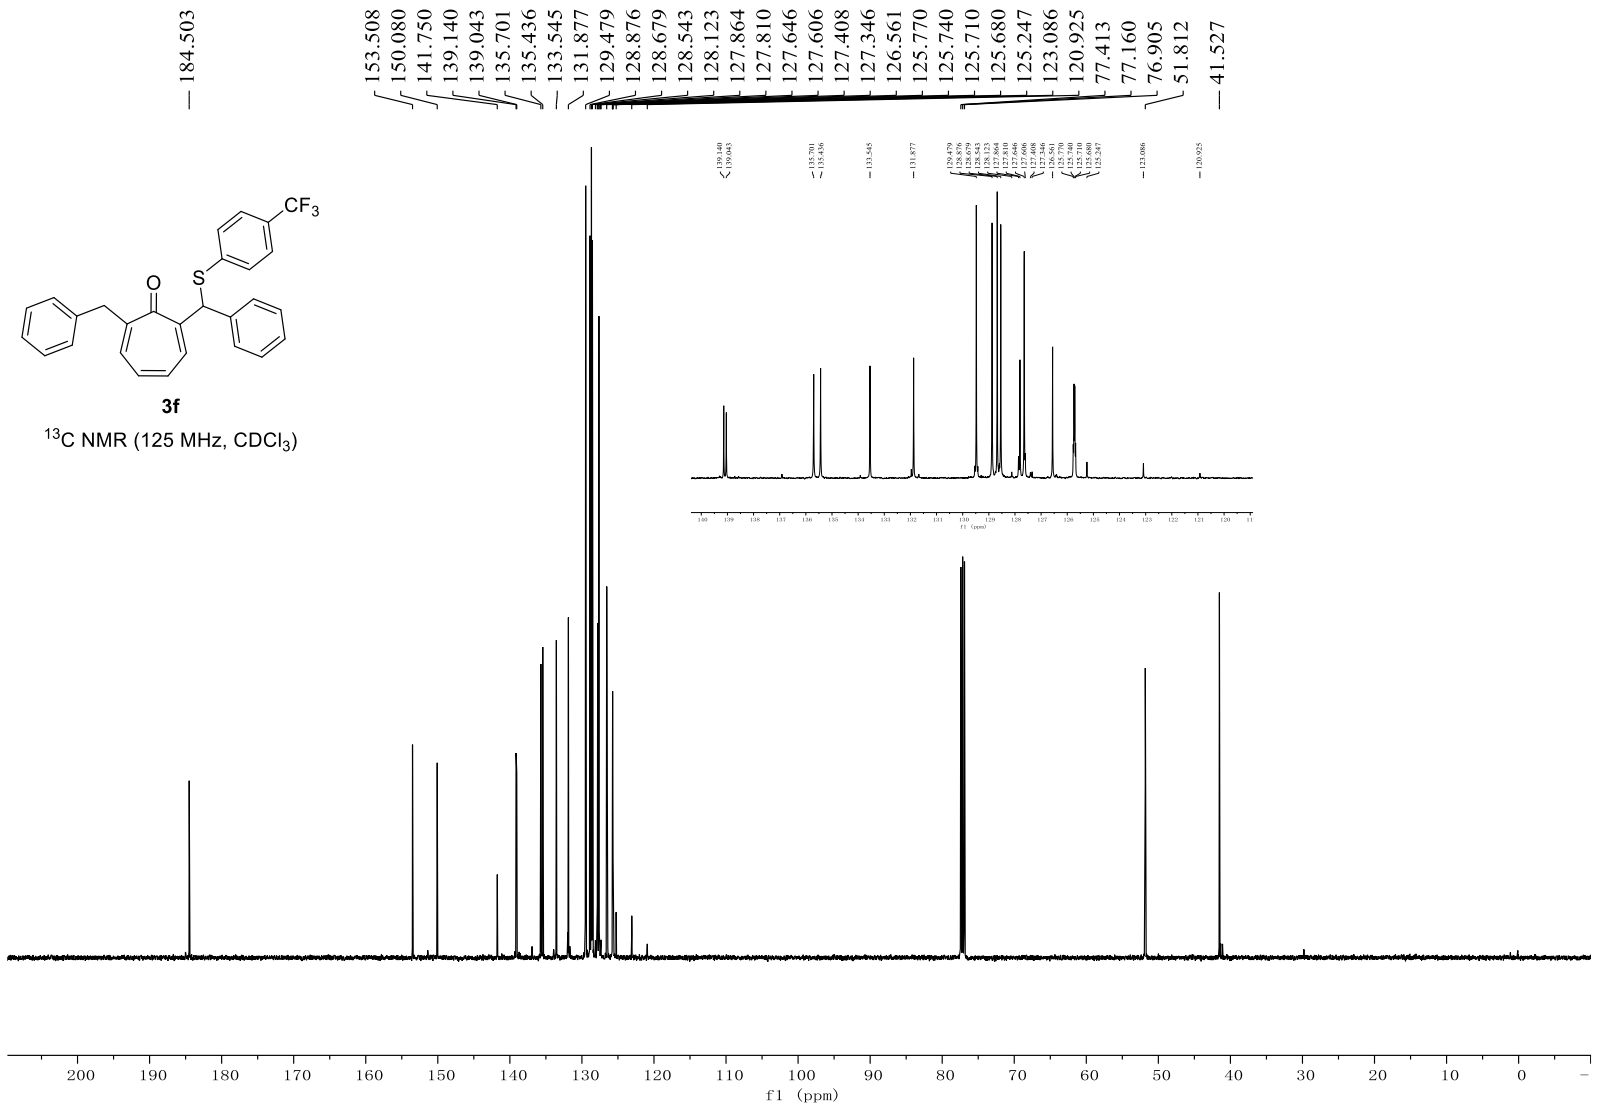

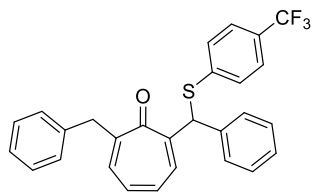

**3f**

<sup>19</sup>F NMR (471 MHz, CDCl<sub>3</sub>)

— -62.352

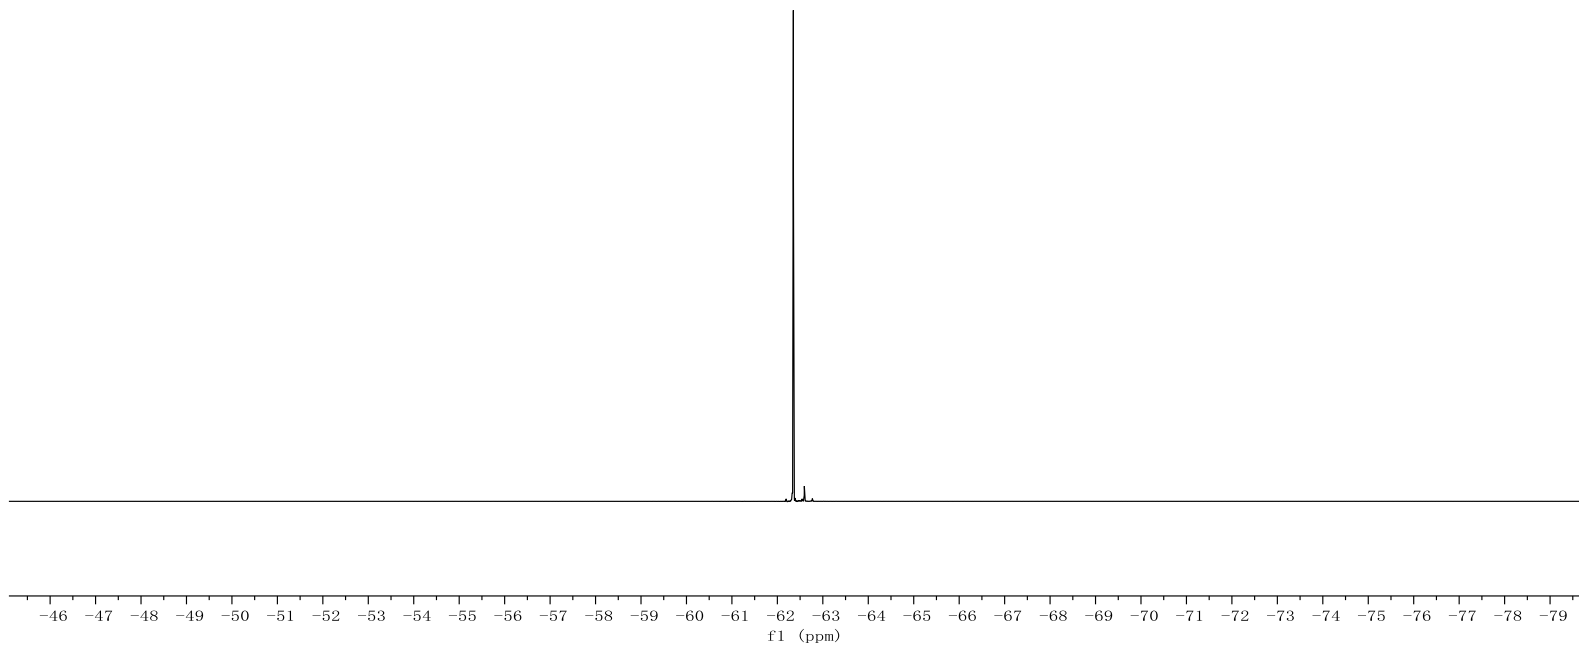

S-107

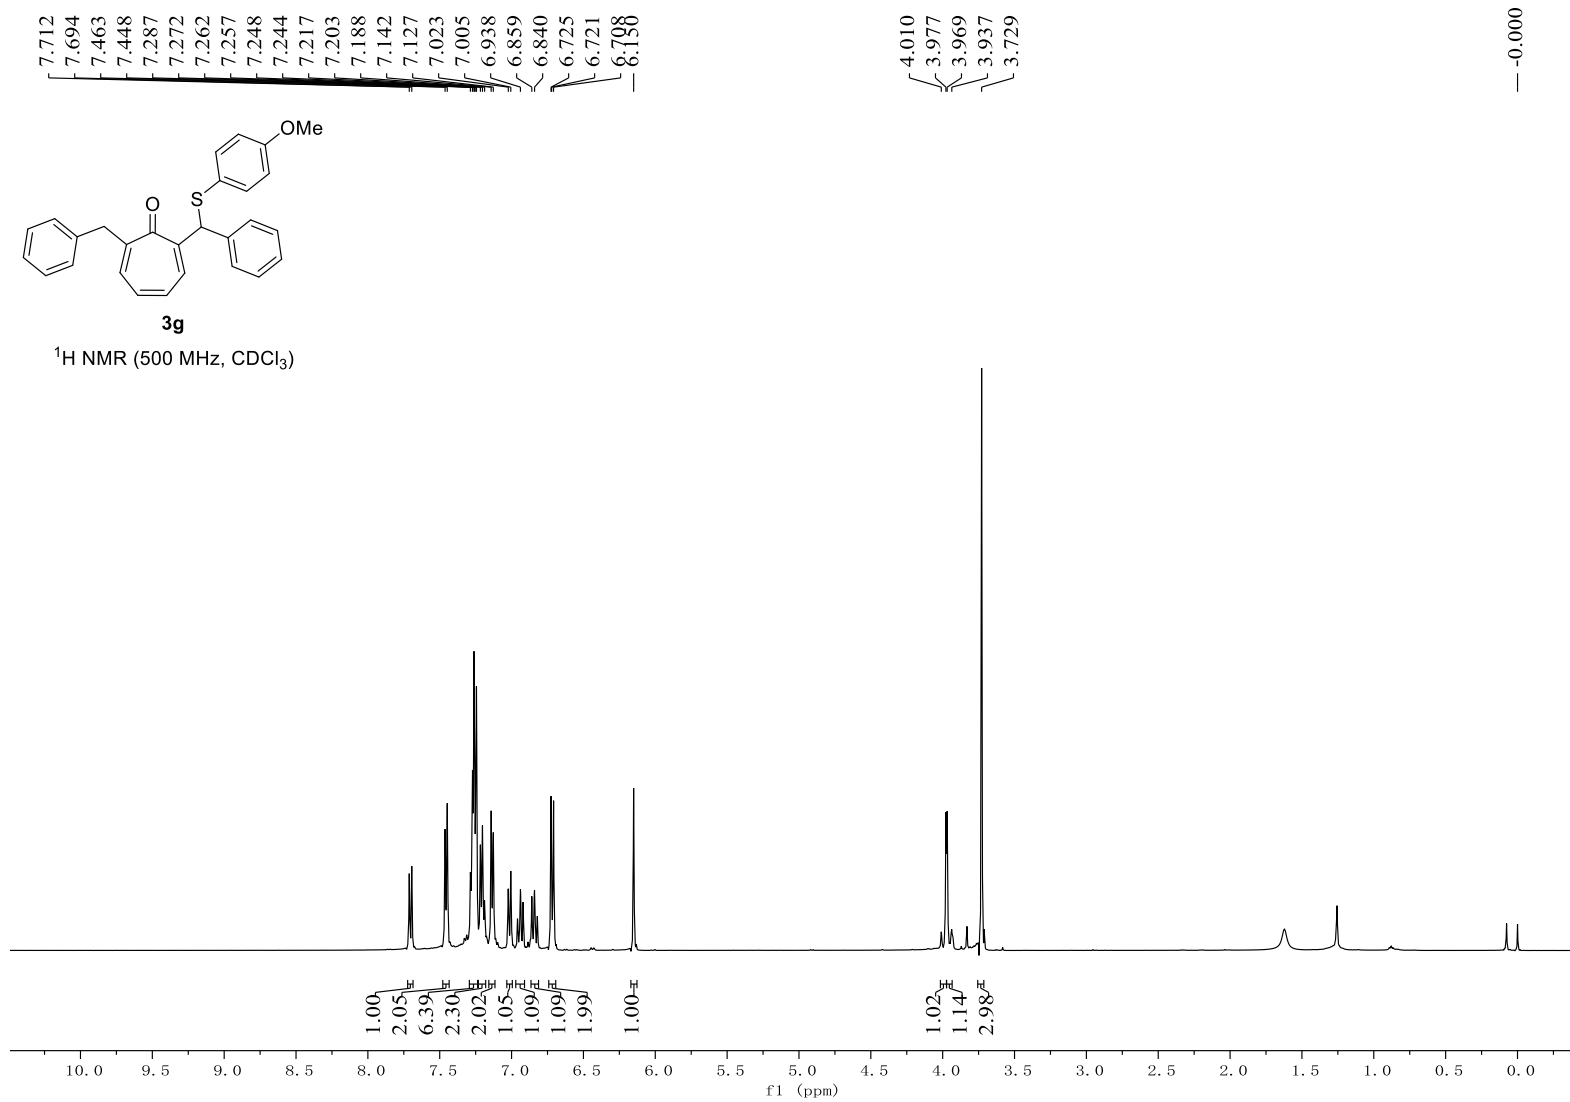



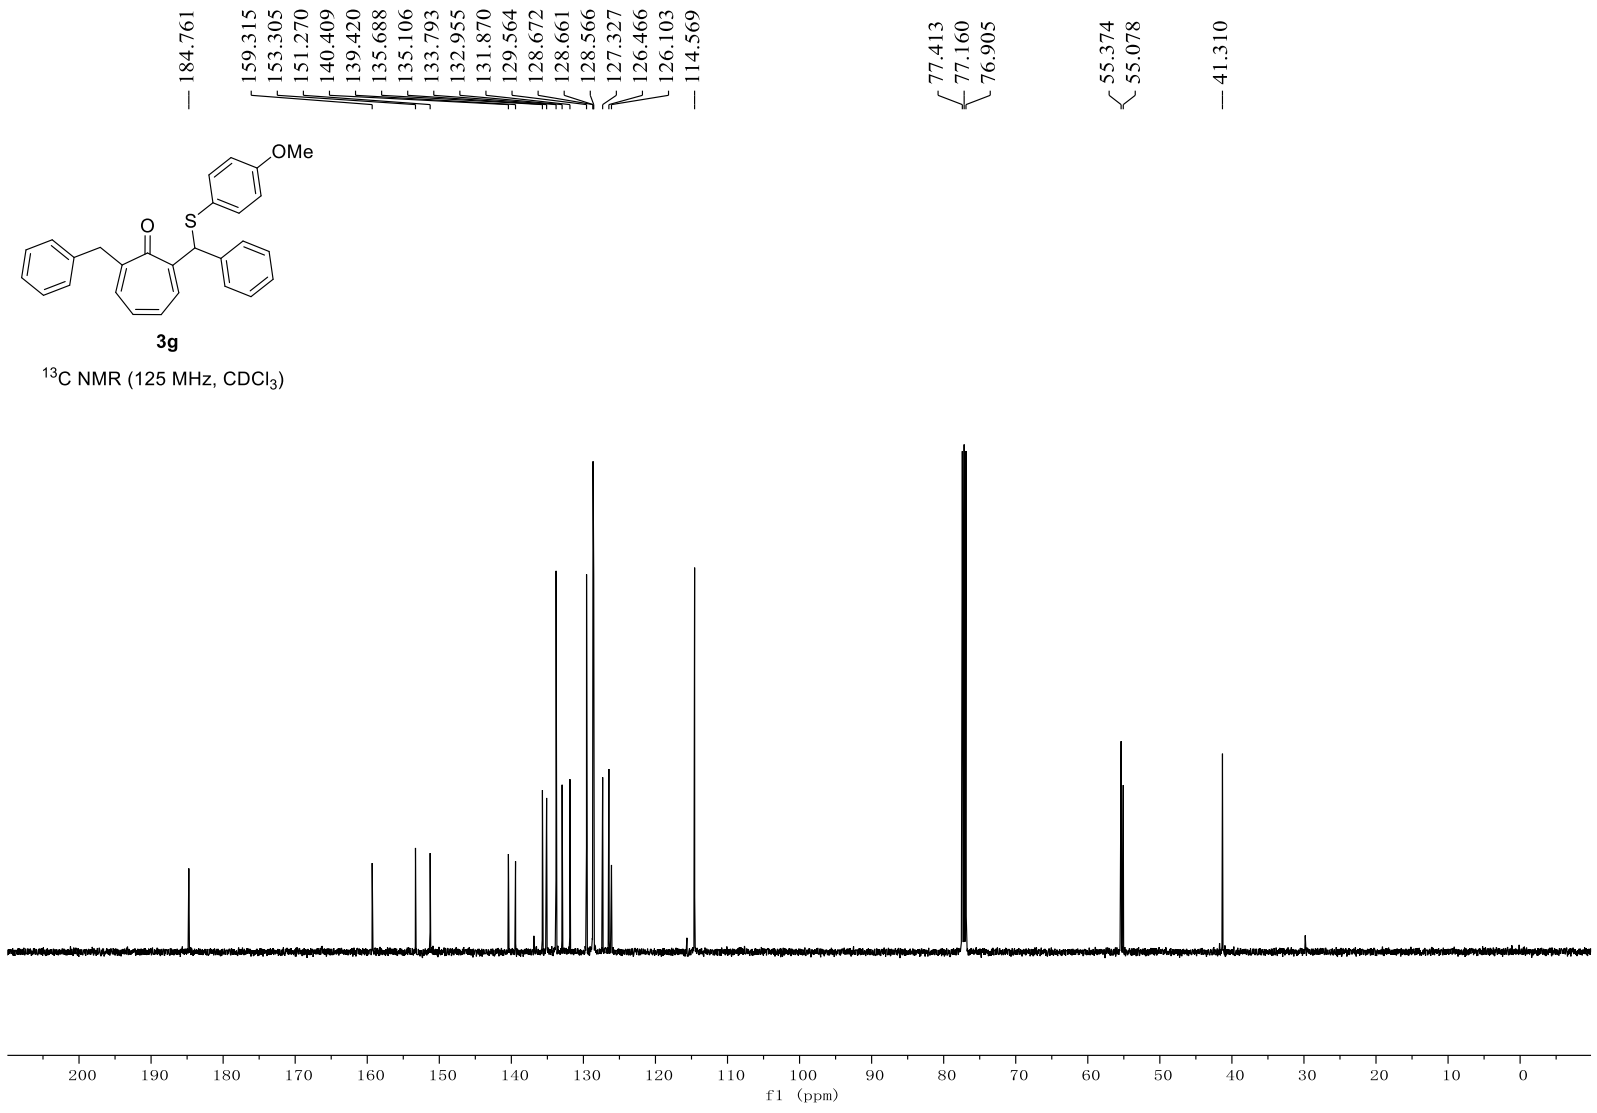

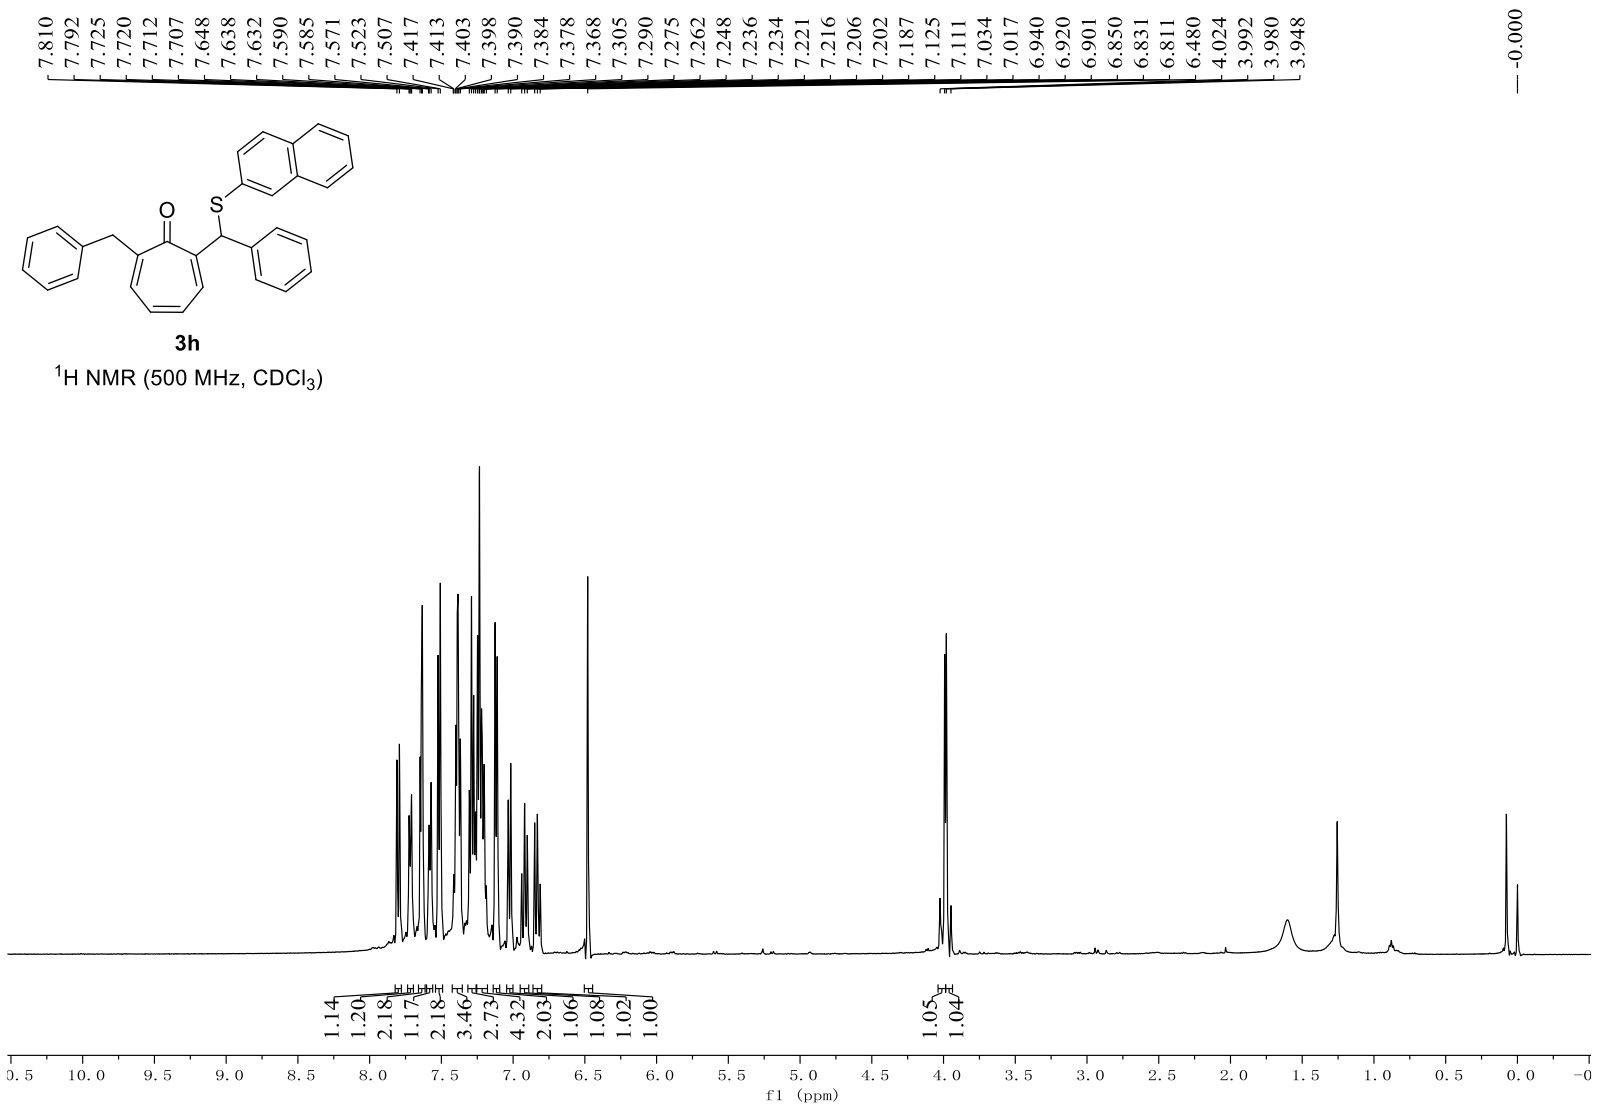

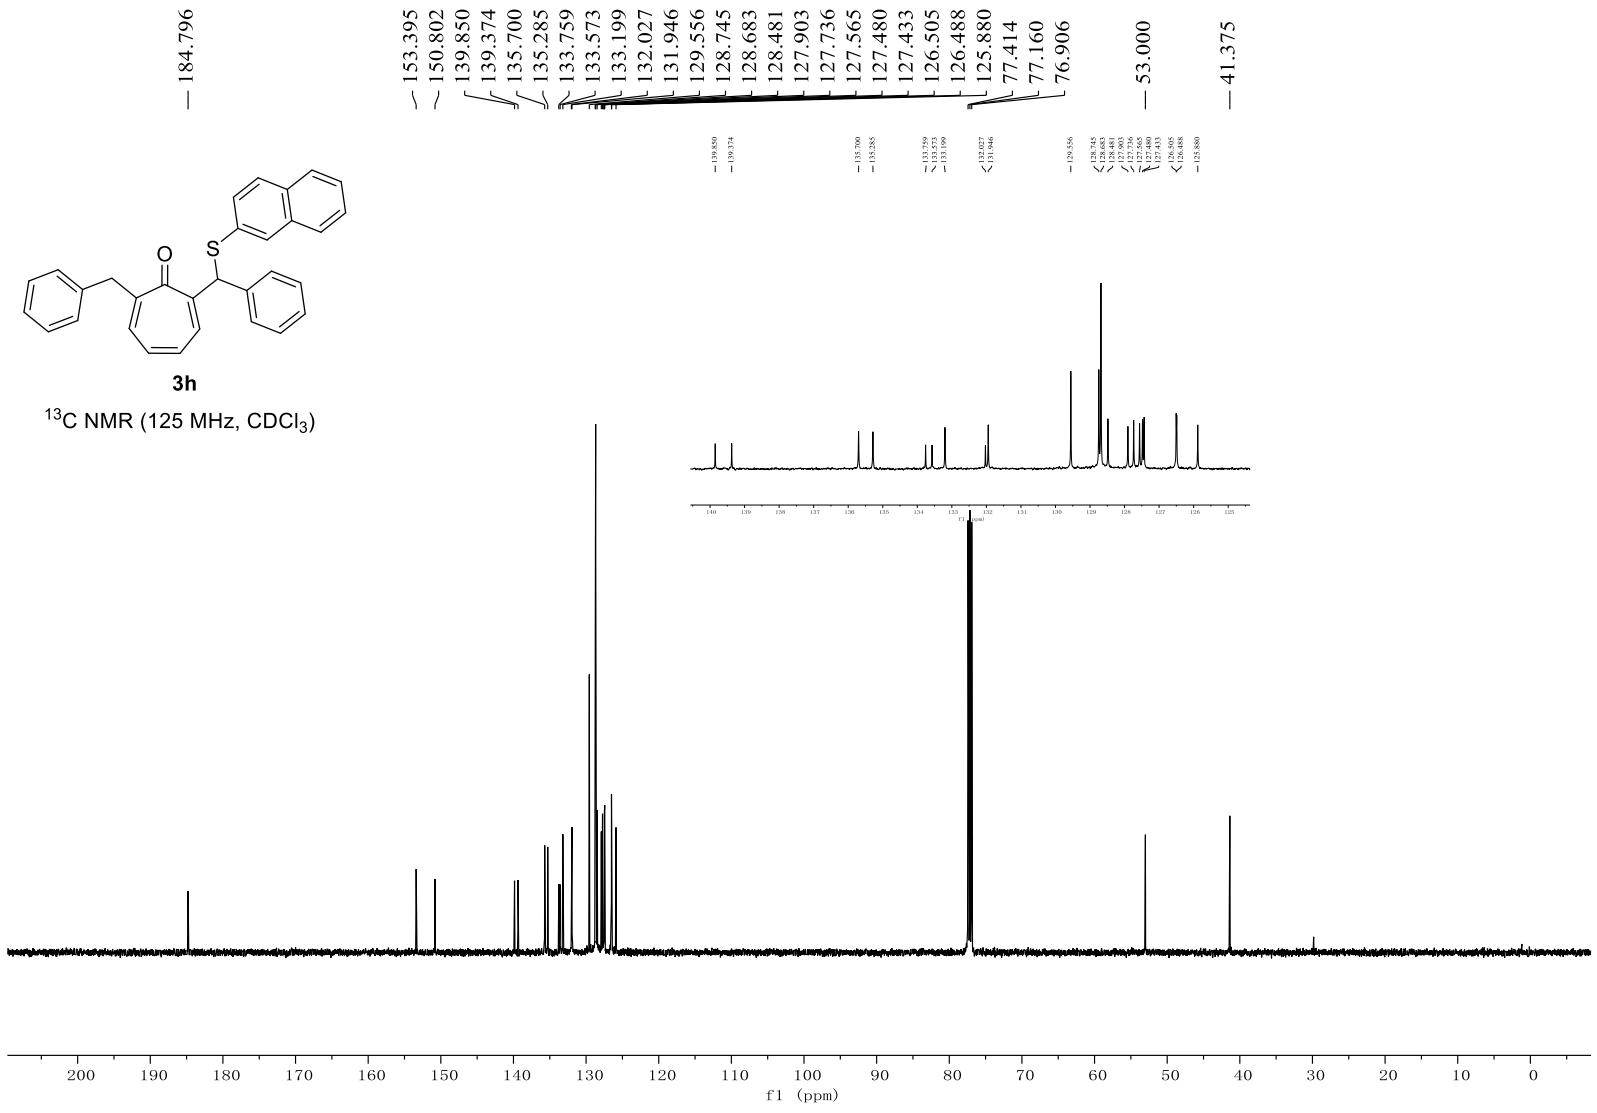

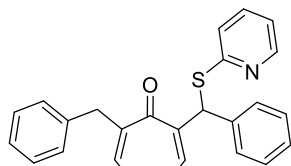

**3i**

<sup>1</sup>H NMR (500 MHz, CDCl<sub>3</sub>)

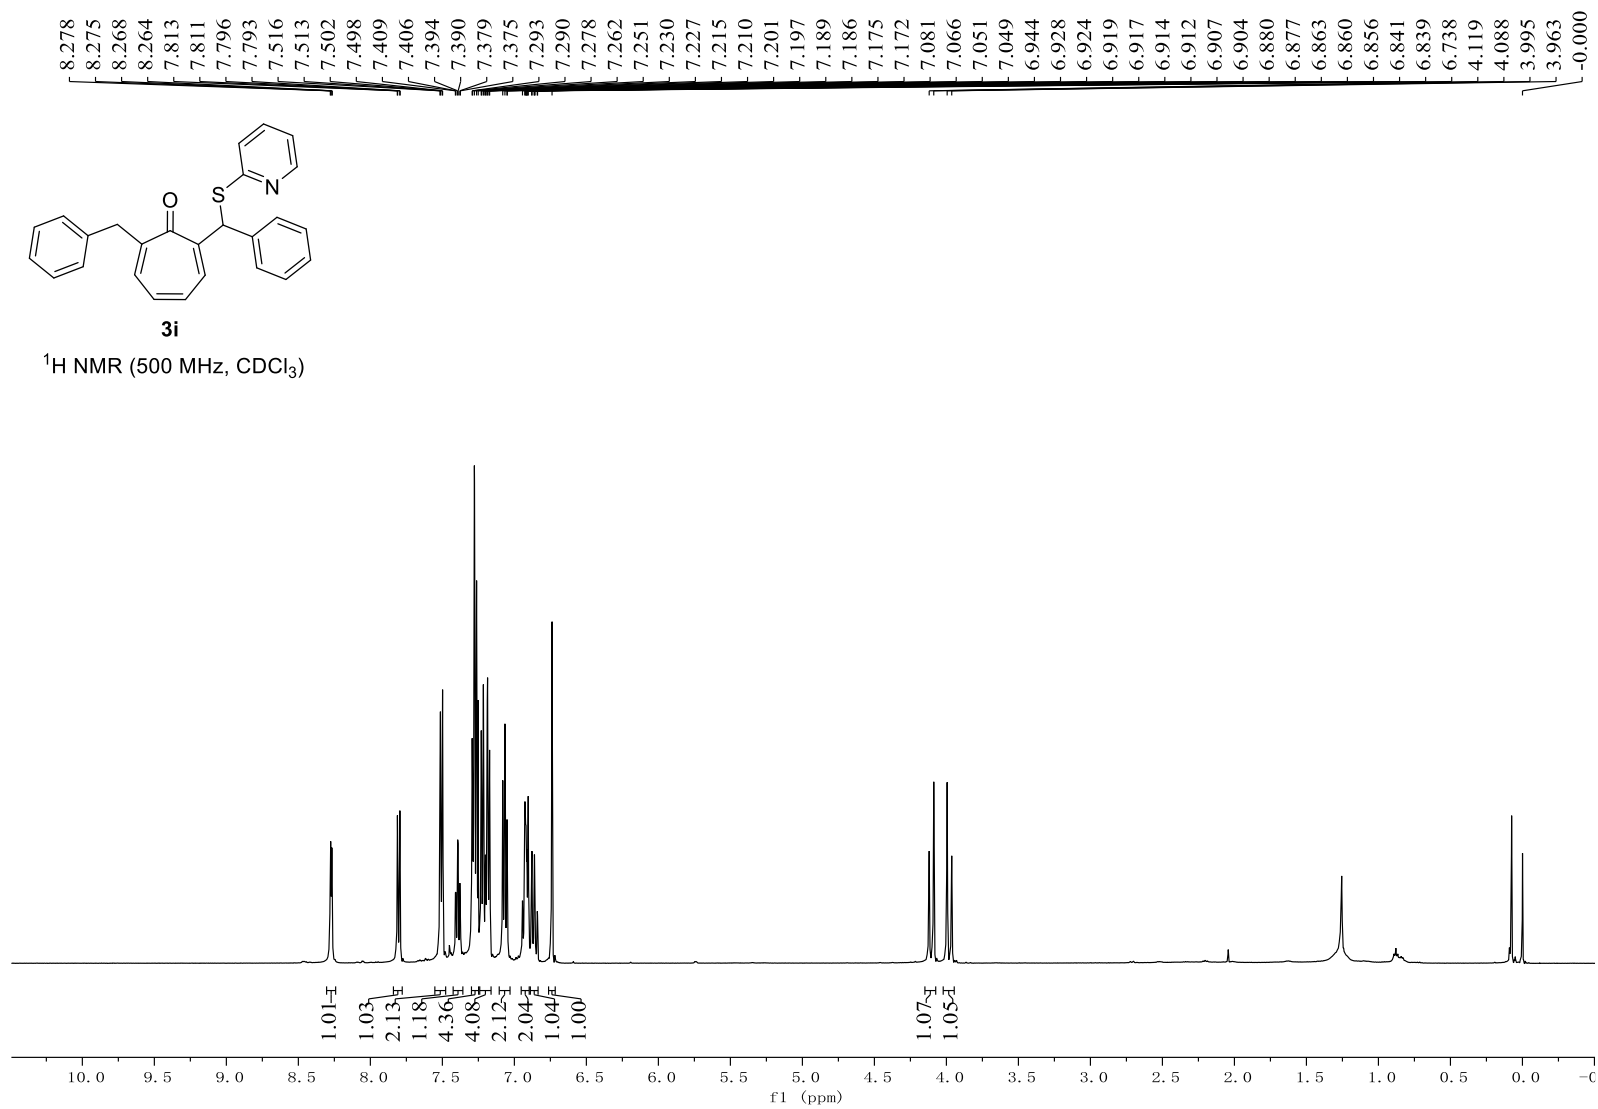

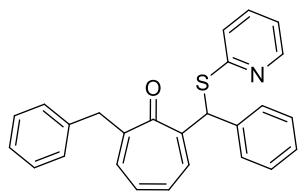

**3i**

<sup>13</sup>C NMR (125 MHz, CDCl<sub>3</sub>)

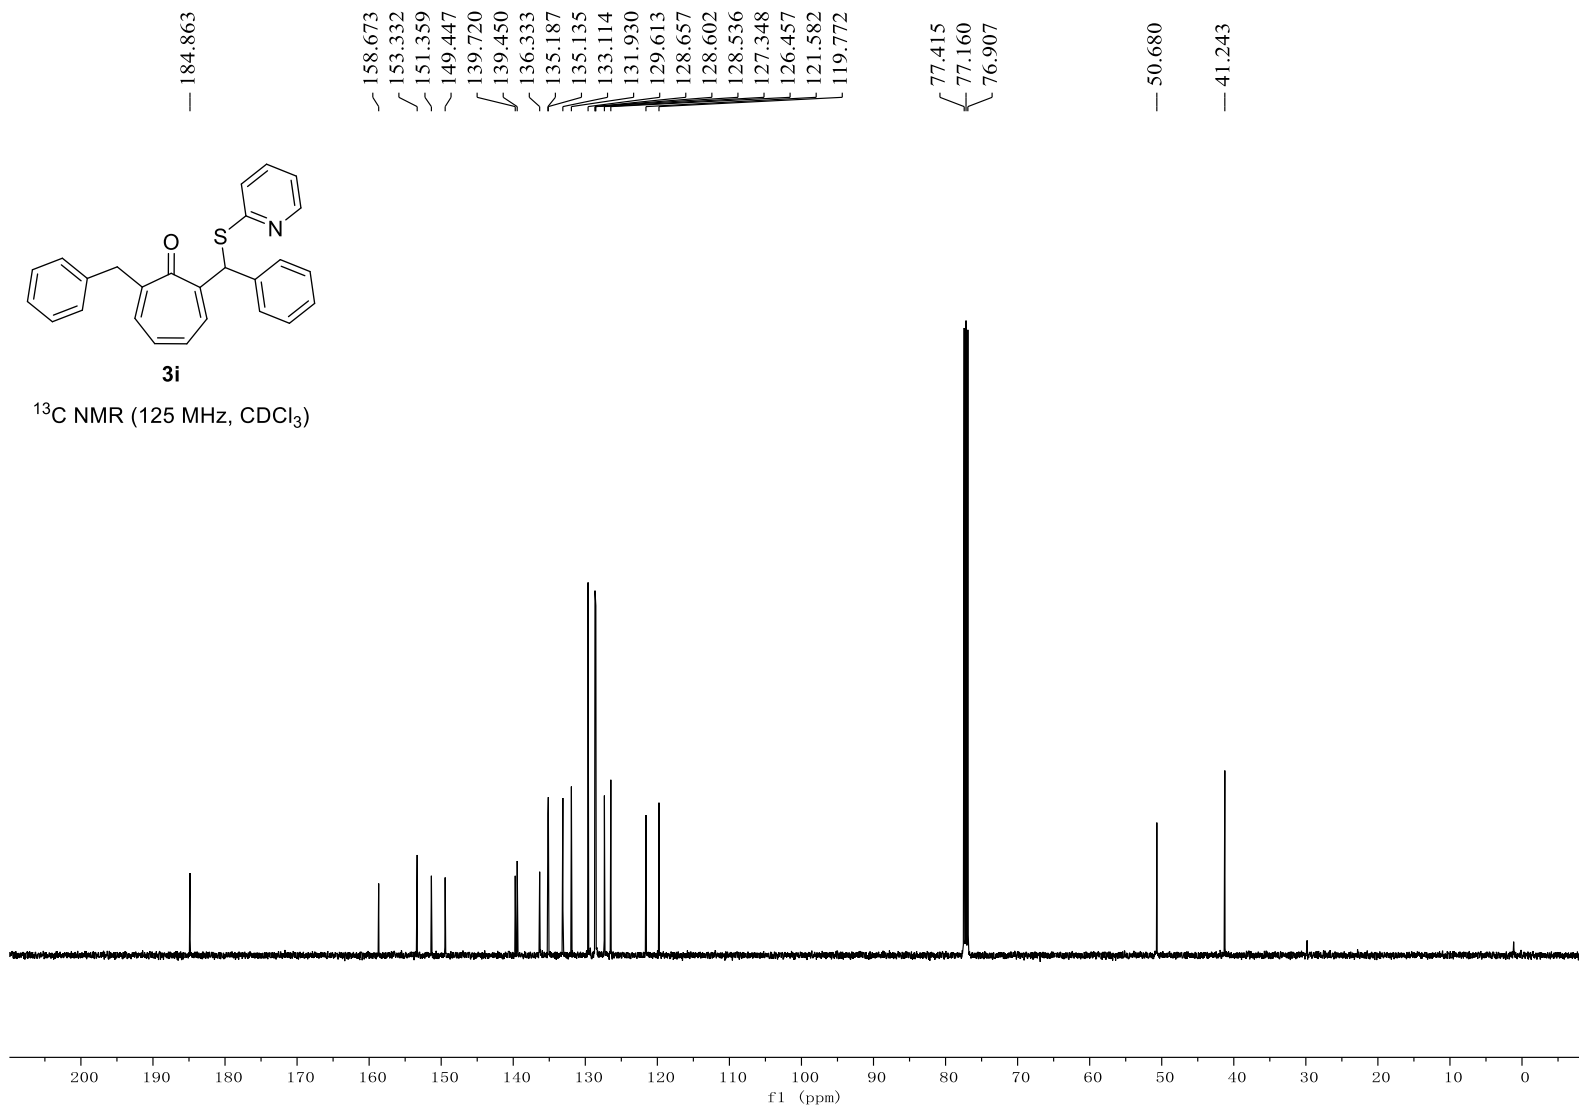

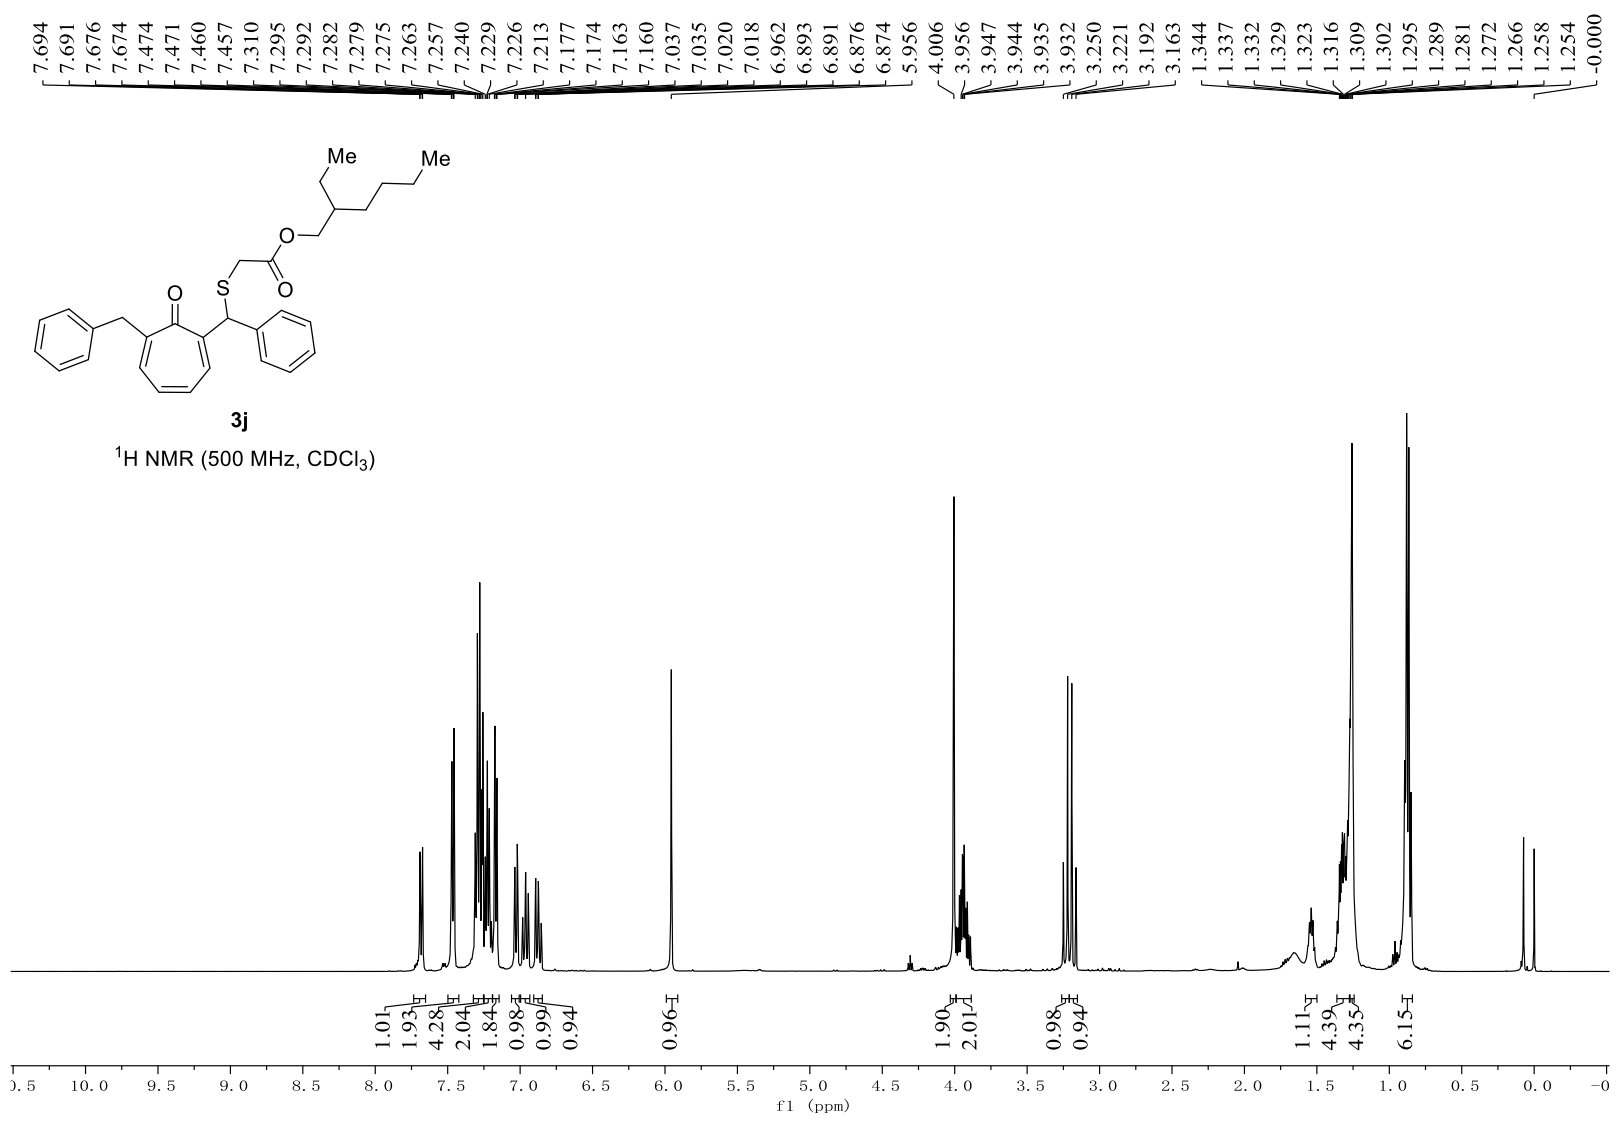

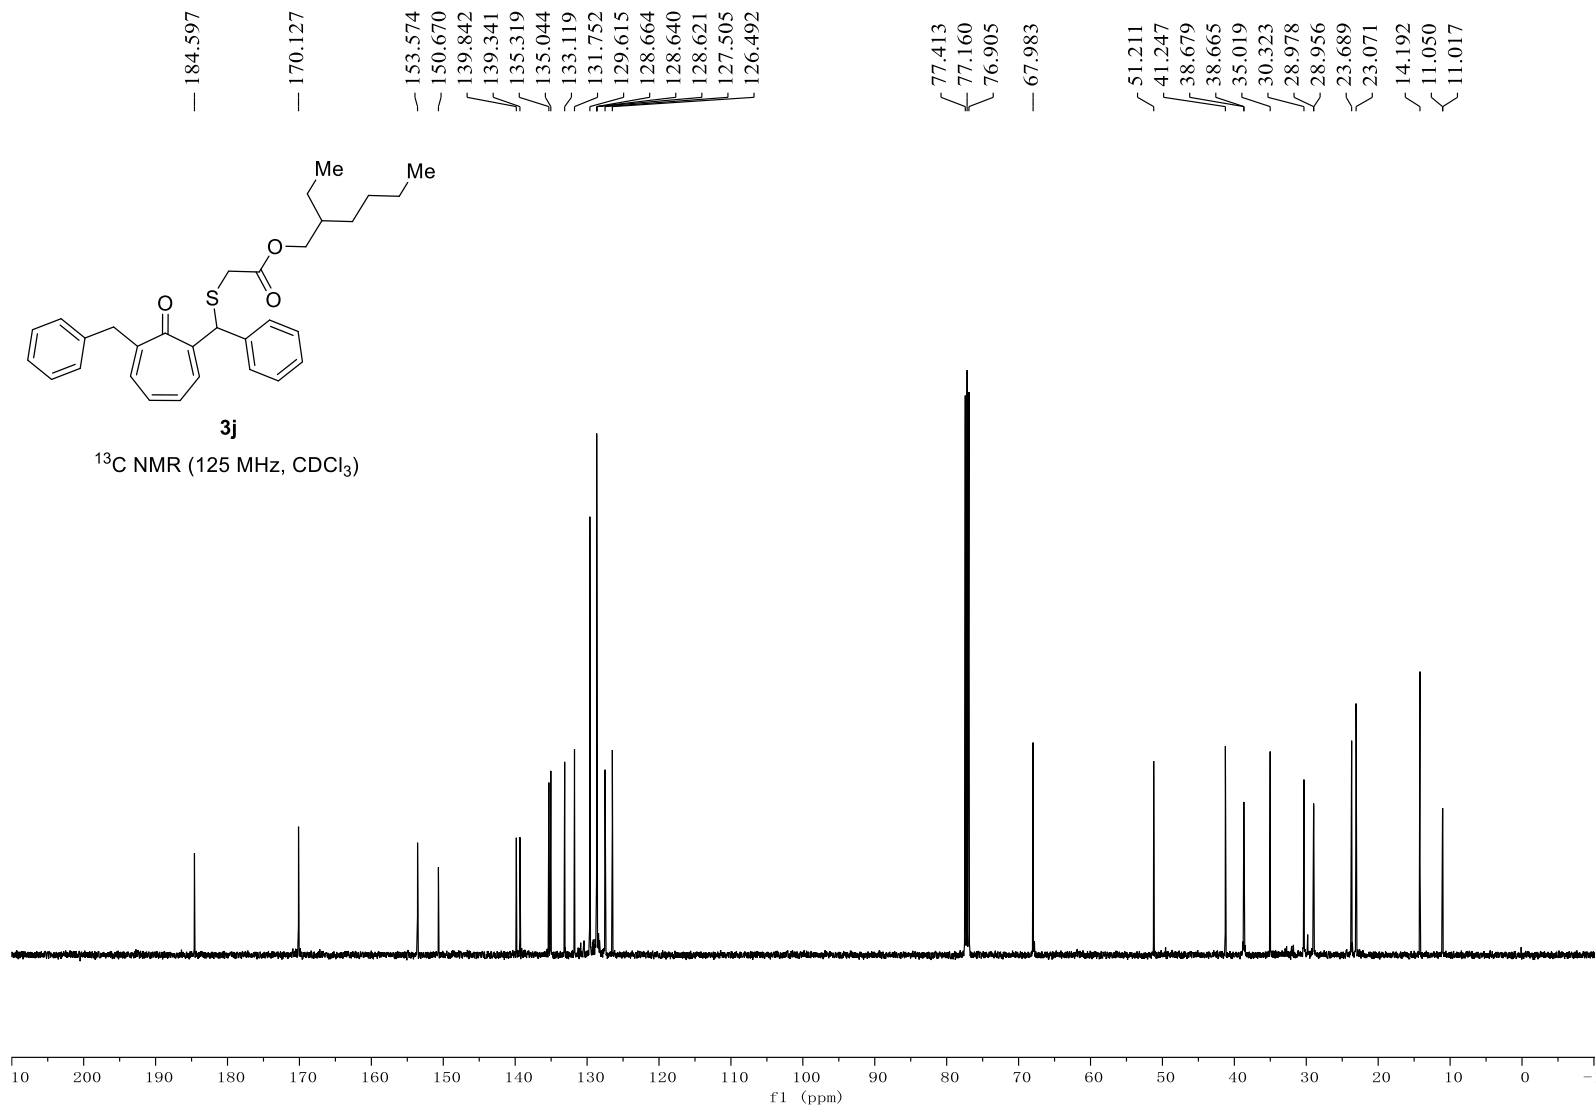

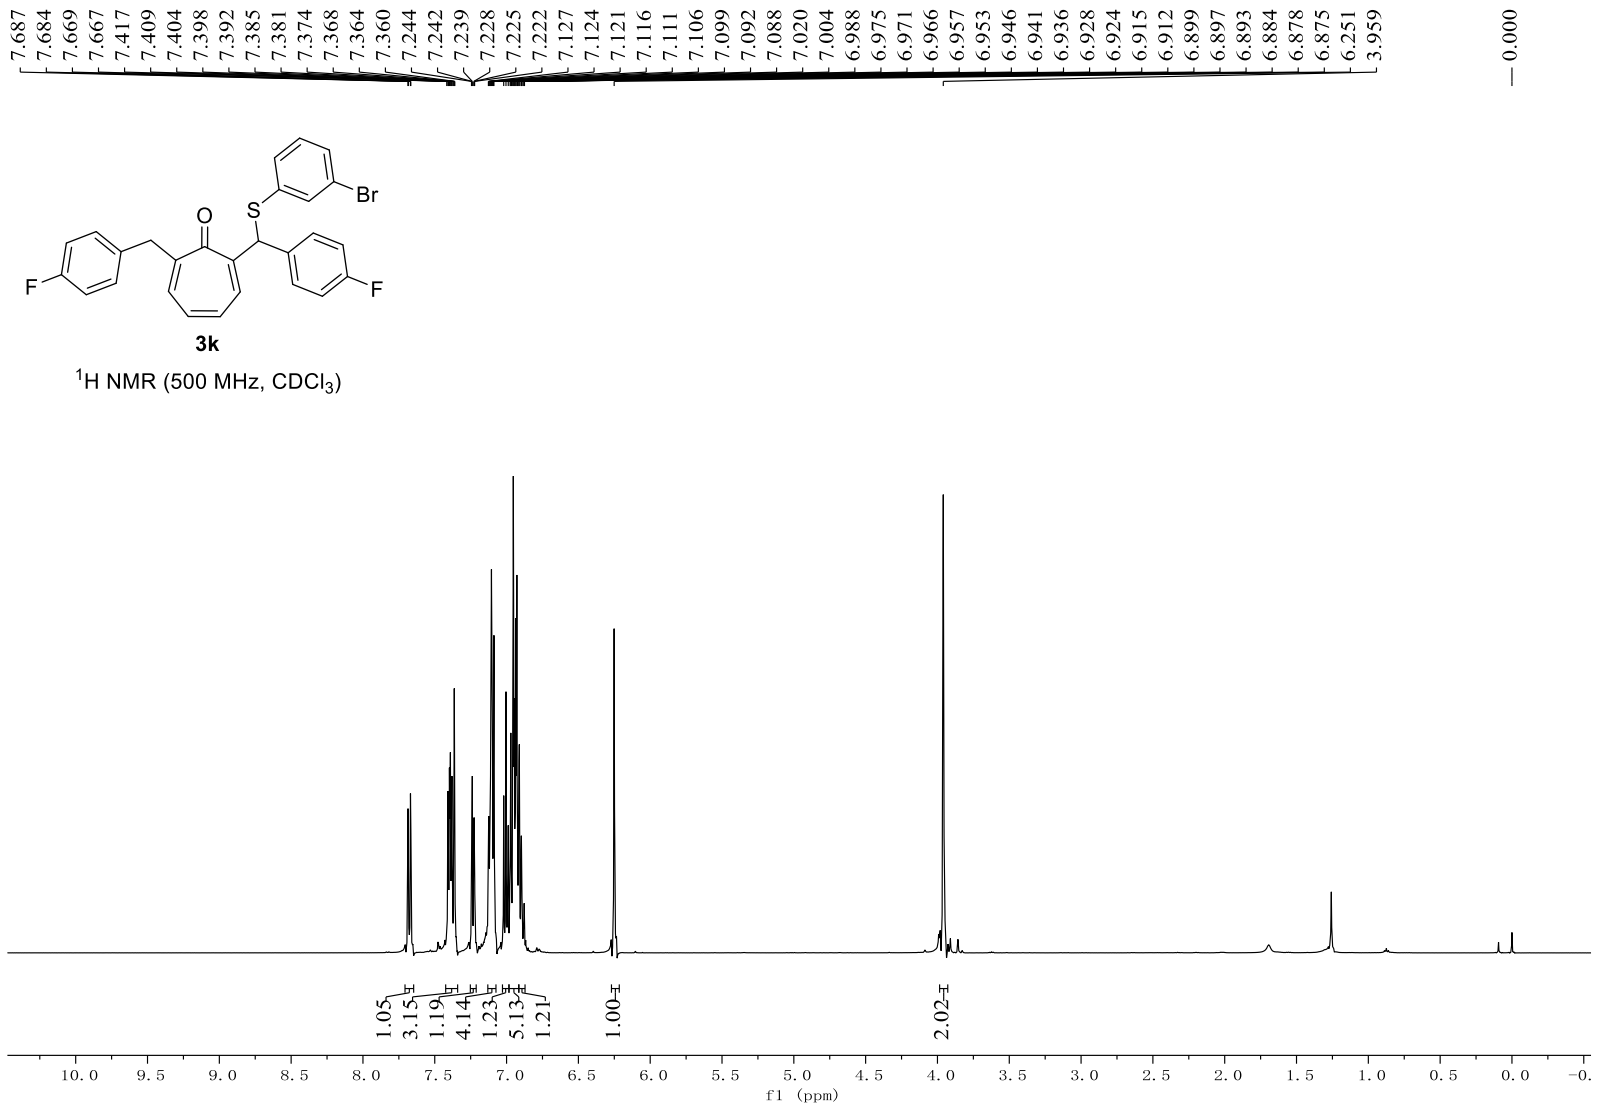



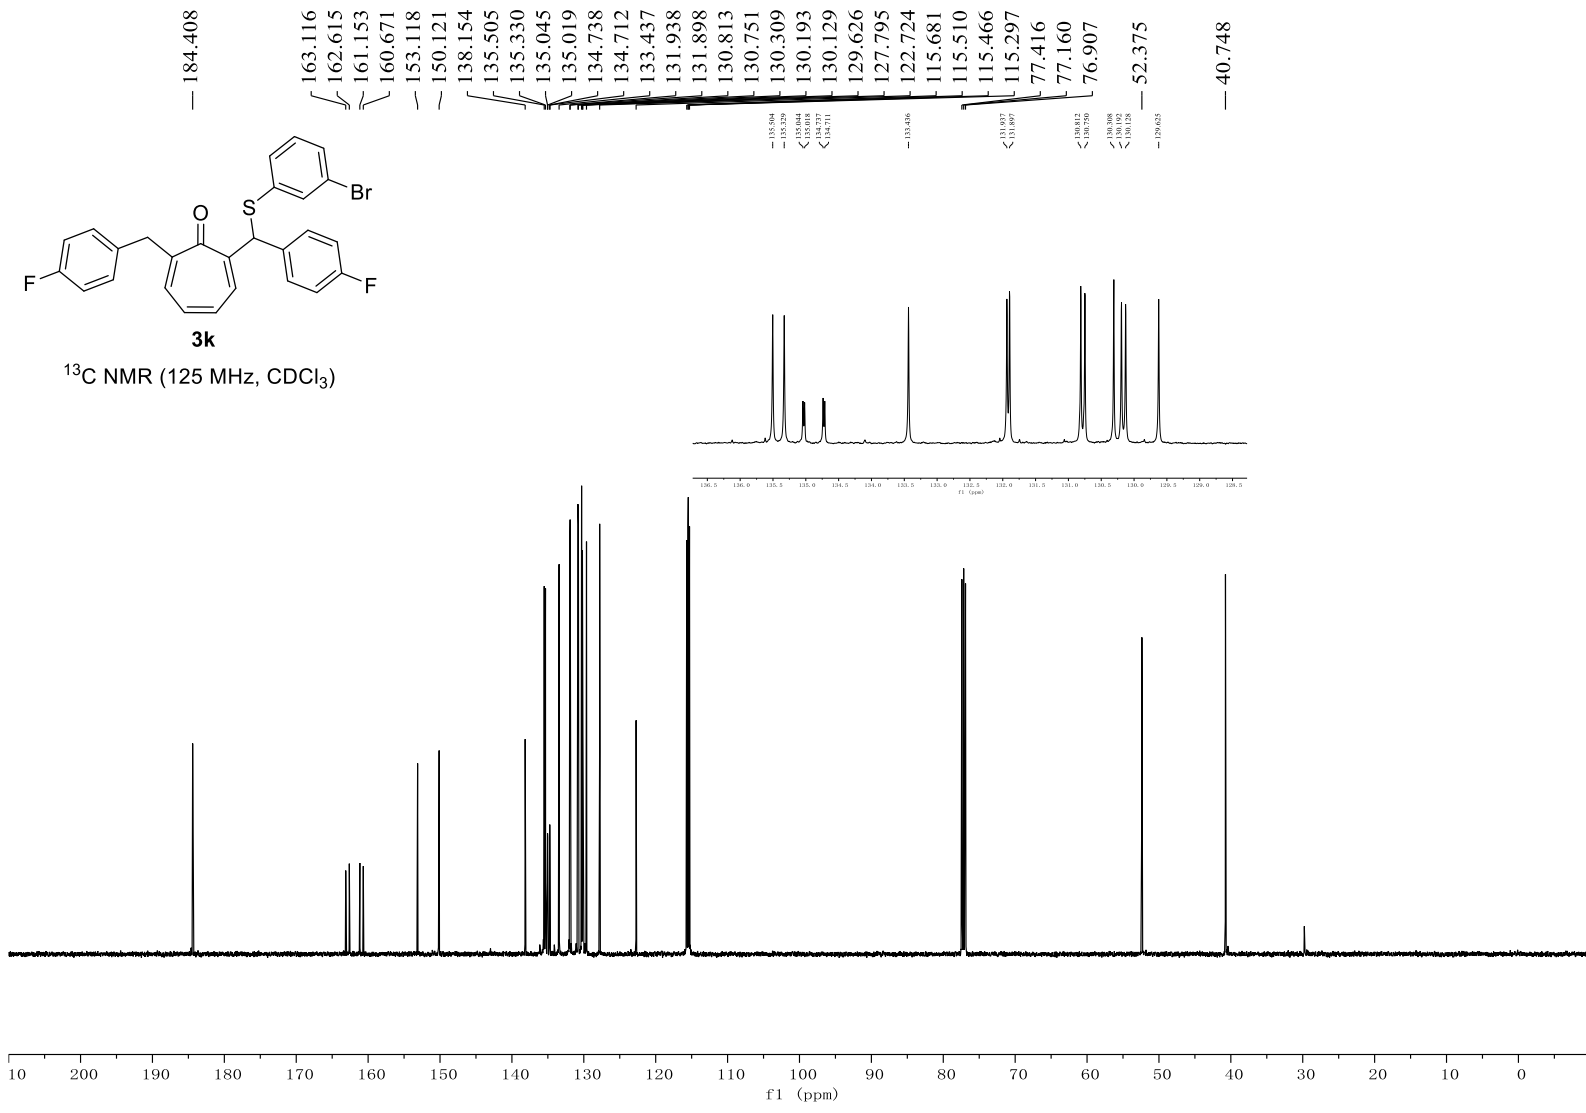

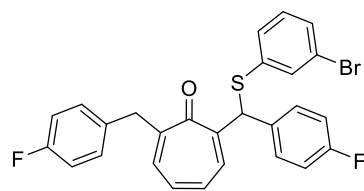

**3k**

$^{19}\text{F}$  NMR (470 MHz,  $\text{CDCl}_3$ )

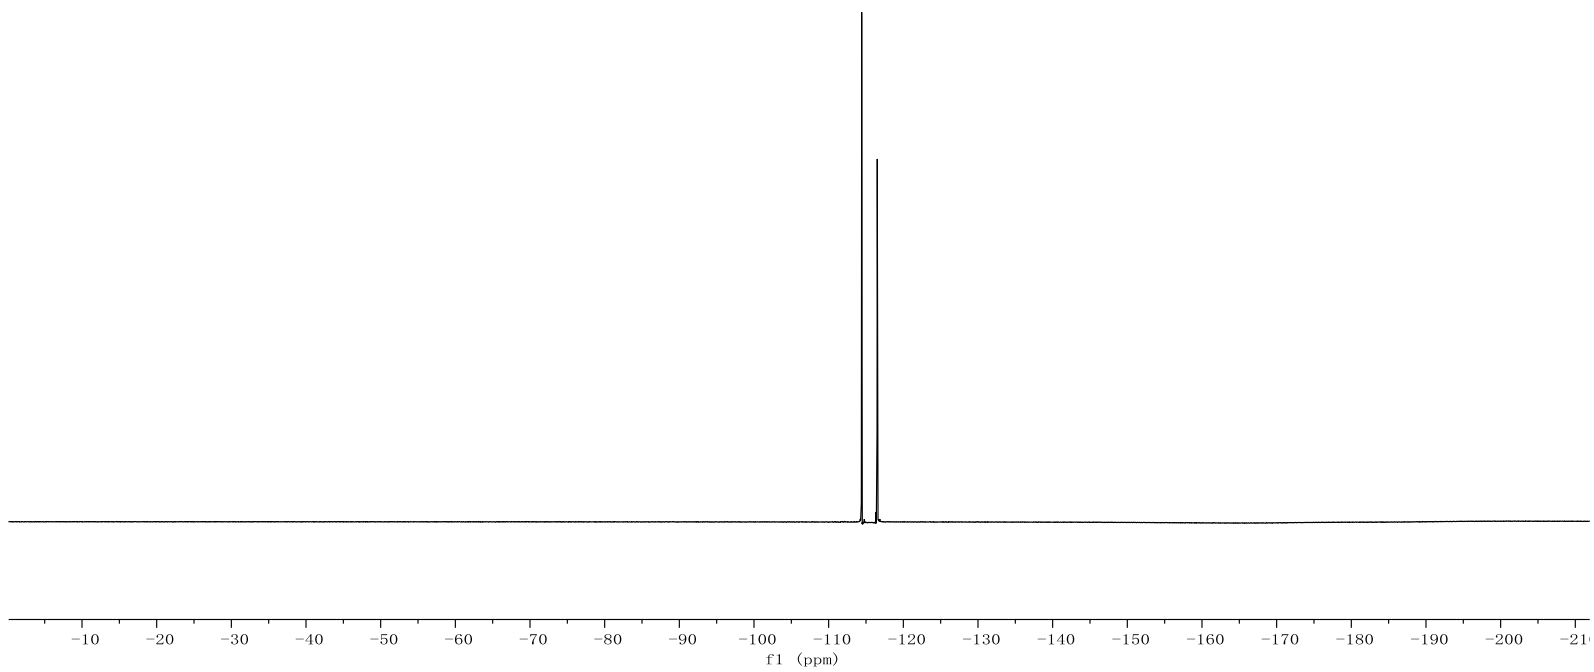

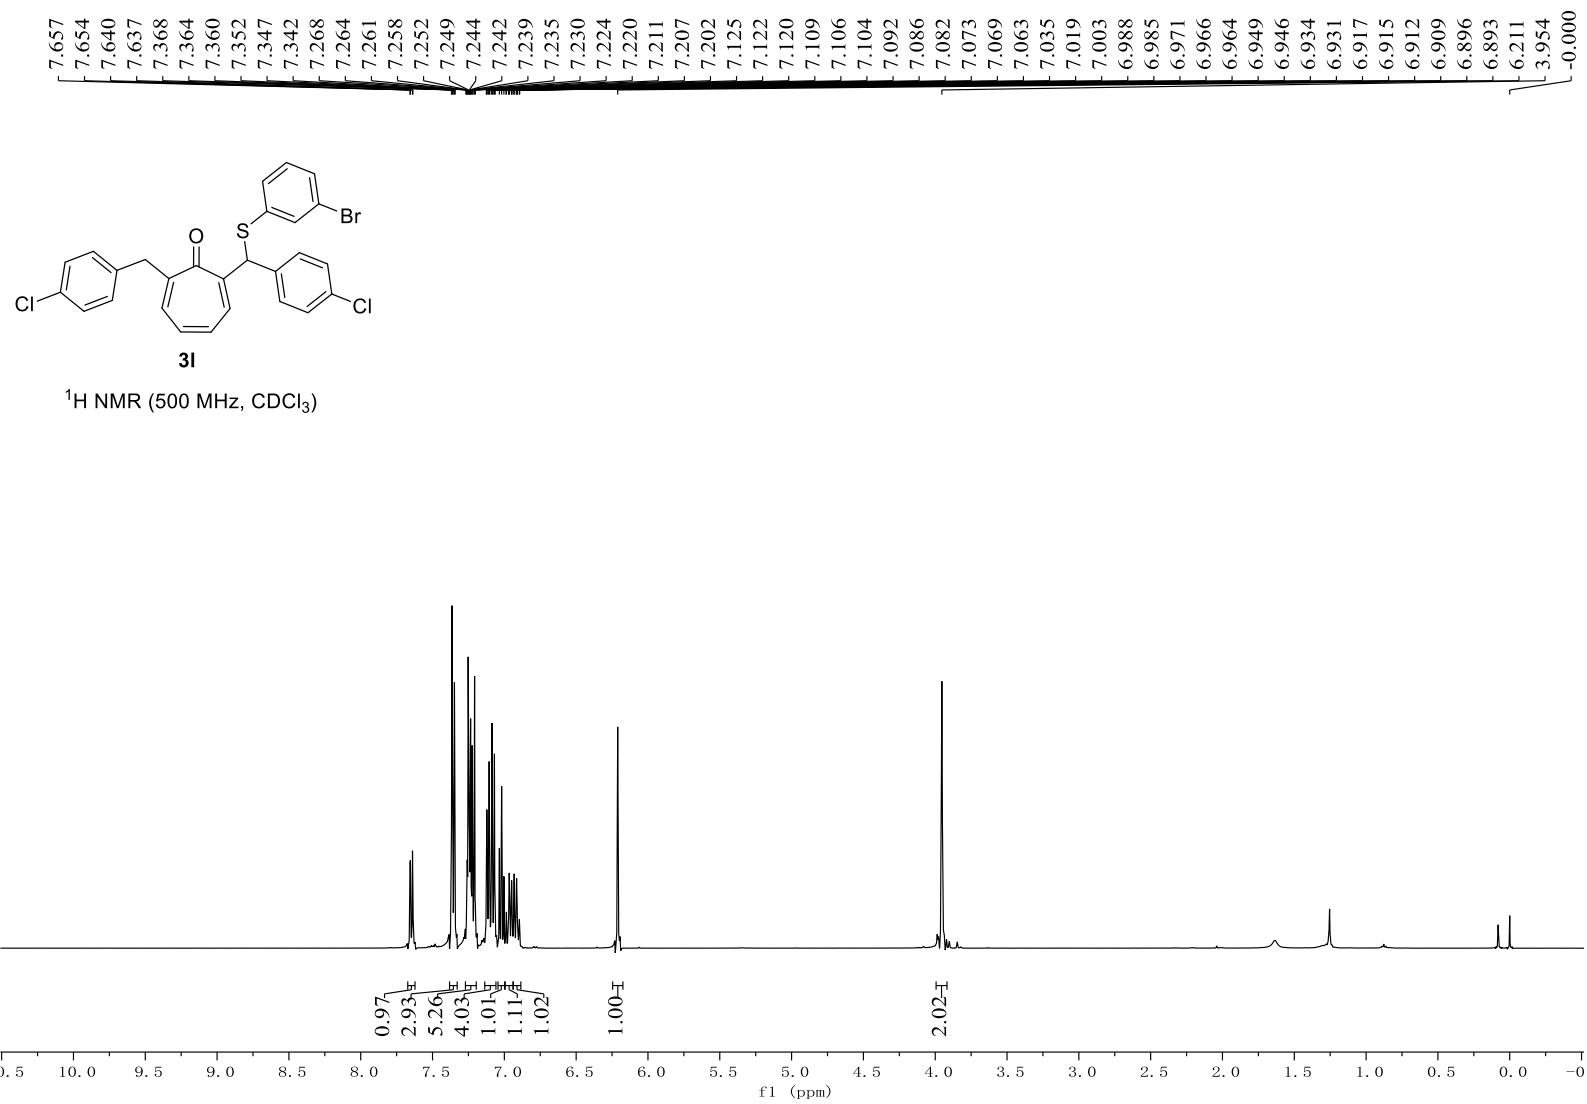

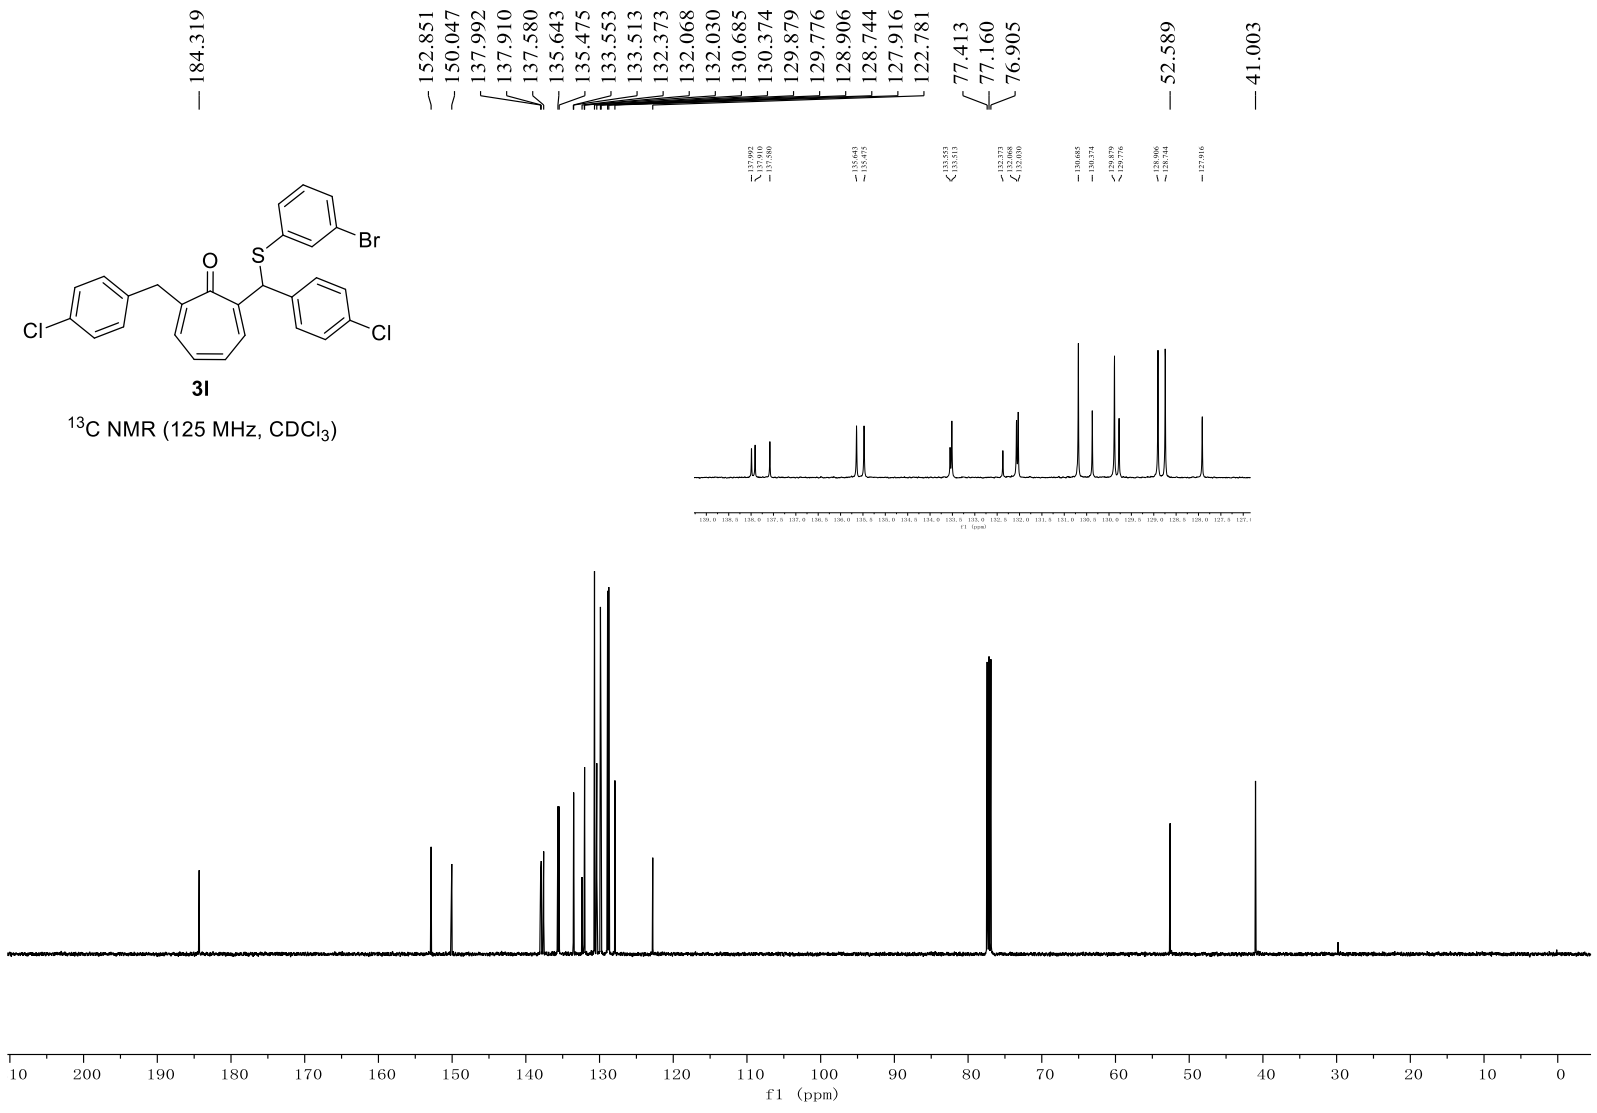

7.648  
7.645  
7.631  
7.628  
7.409  
7.403  
7.399  
7.390  
7.386  
7.381  
7.377  
7.371  
7.366  
7.361  
7.358  
7.354  
7.349  
7.310  
7.304  
7.300  
7.292  
7.287  
7.282  
7.257  
7.255  
7.252  
7.245  
7.242  
7.239  
7.236  
7.120  
7.117  
7.115  
7.105  
7.102  
7.099  
7.027  
7.022  
7.012  
7.010  
7.004  
6.996  
6.978  
6.976  
6.961  
6.957  
6.954  
6.940  
6.937  
6.924  
6.921  
6.907  
6.905  
6.903  
6.900  
6.886  
6.883  
6.192  
3.935  
3.930

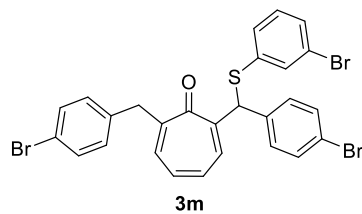

<sup>1</sup>H NMR (500 MHz, CDCl<sub>3</sub>)

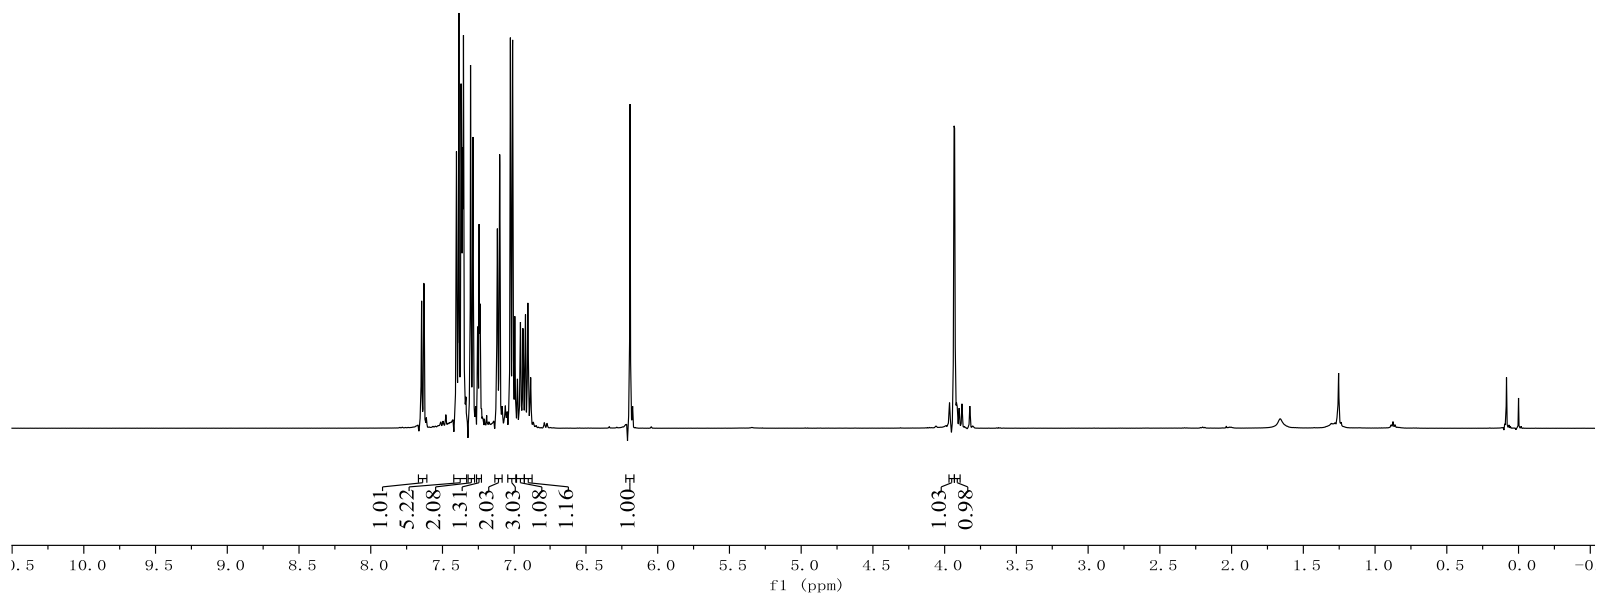

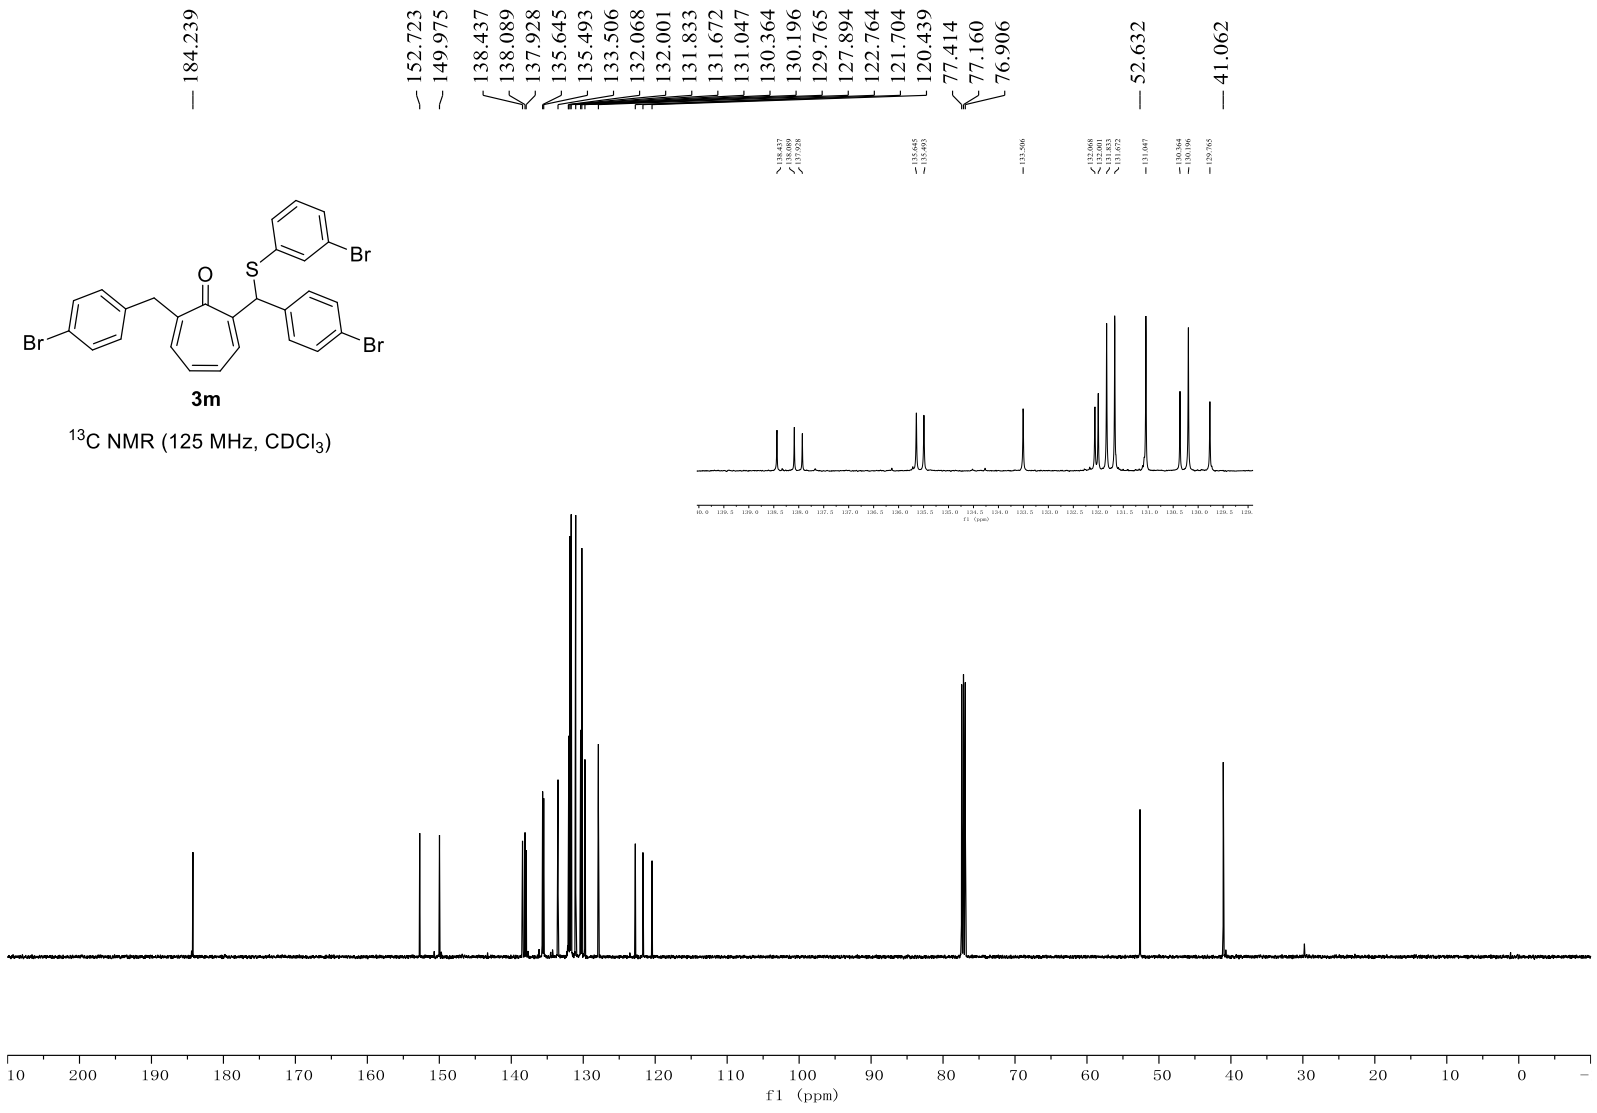

7.650  
7.633  
7.611  
7.595  
7.577  
7.561  
7.360  
7.356  
7.352  
7.261  
7.251  
7.244  
7.182  
7.166  
7.121  
7.114  
7.105  
7.101  
7.097  
7.019  
6.915  
6.908  
6.892  
6.179

3.960  
3.929  
3.922  
3.891

0.000

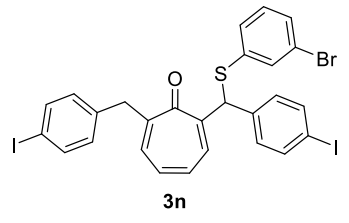

<sup>1</sup>H NMR (500 MHz, CDCl<sub>3</sub>)

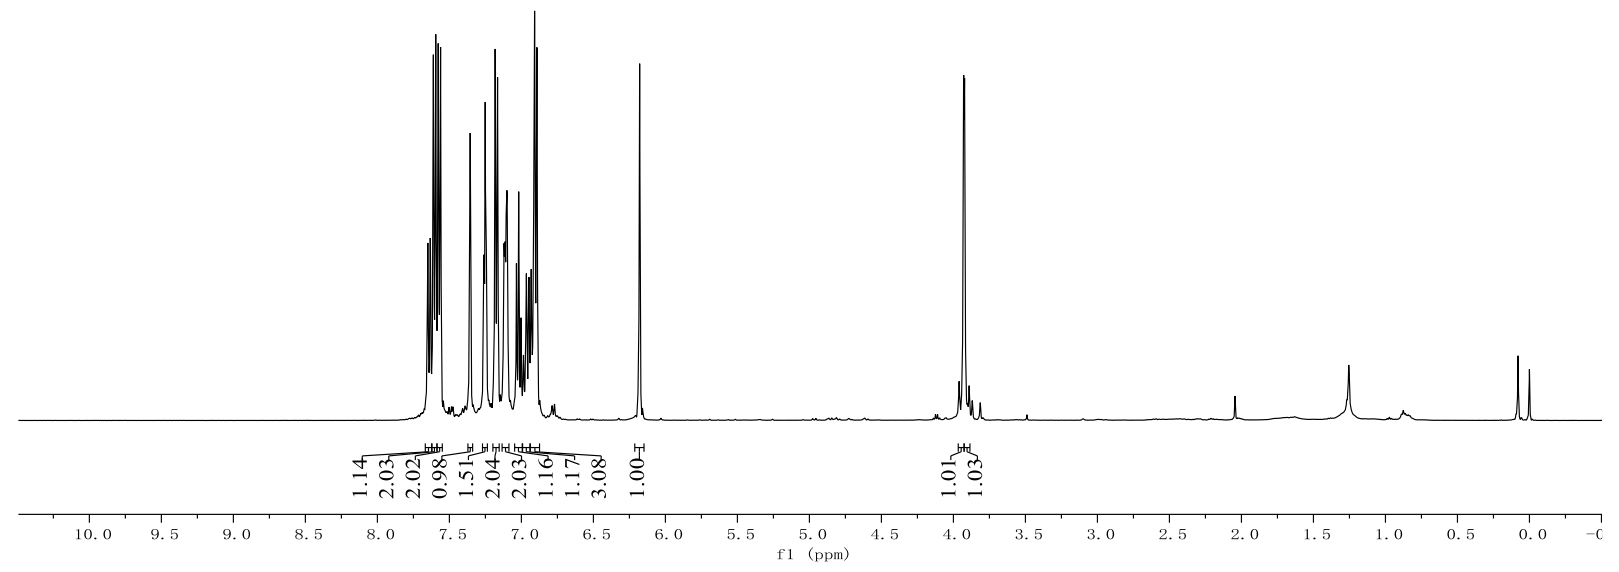





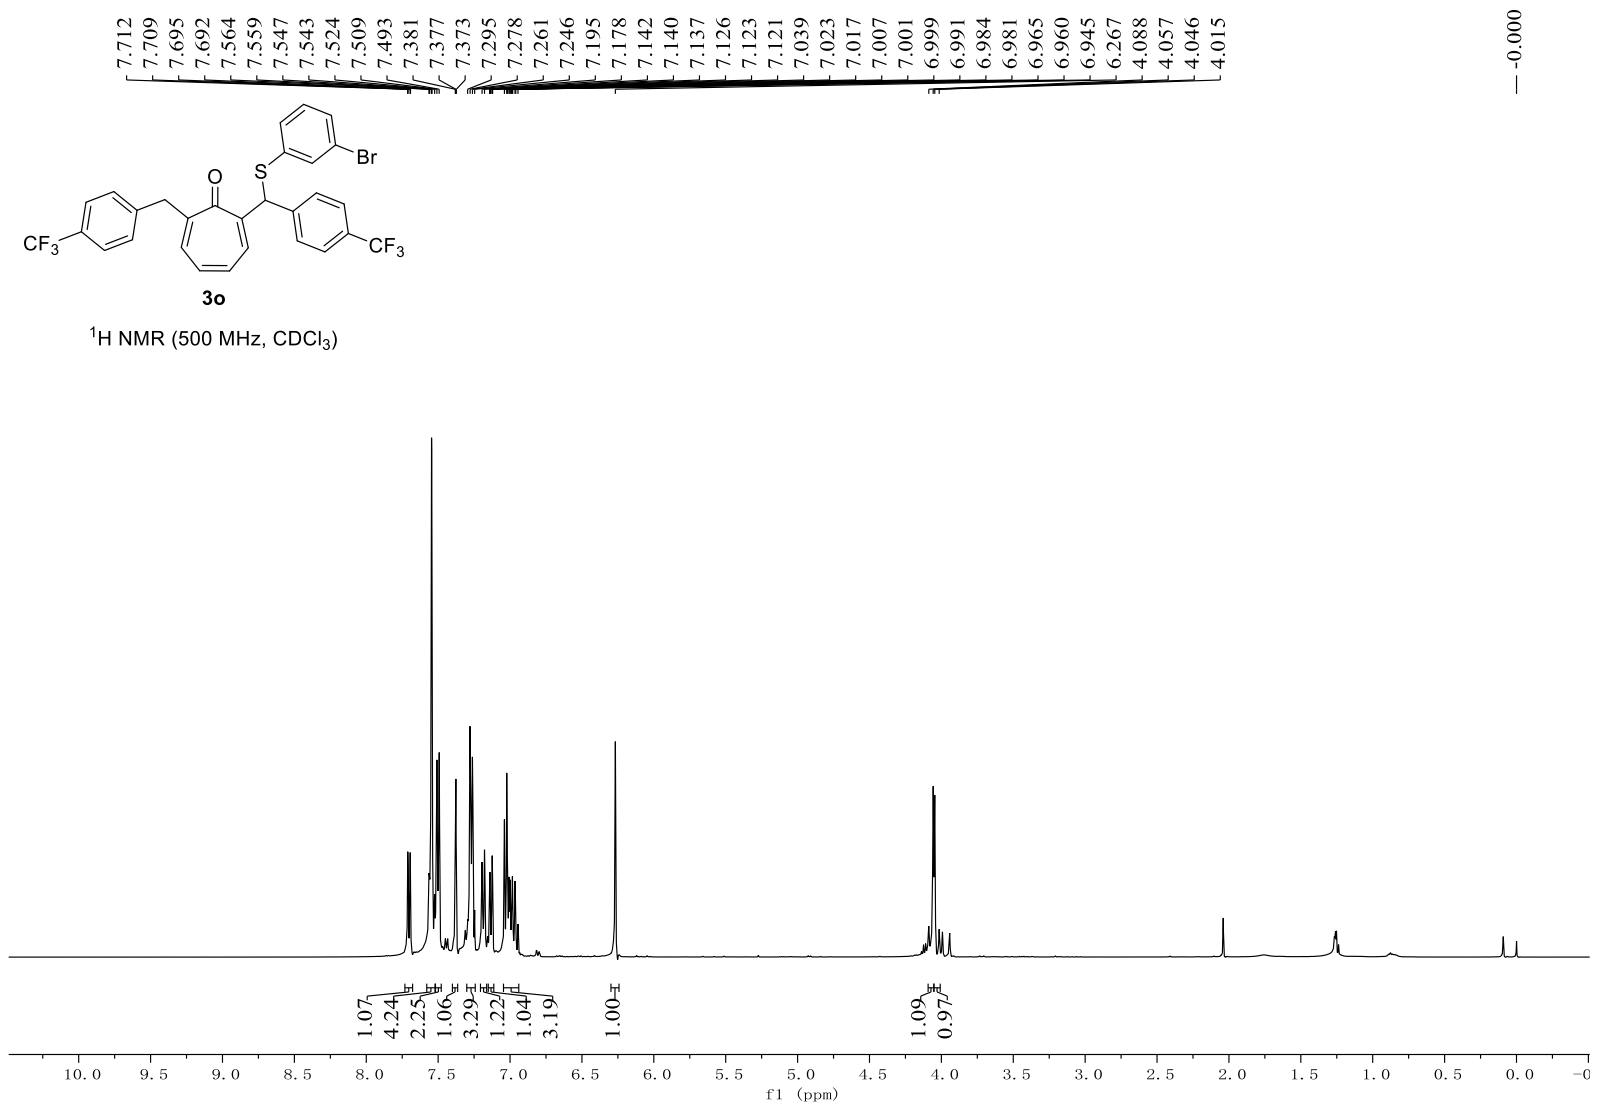

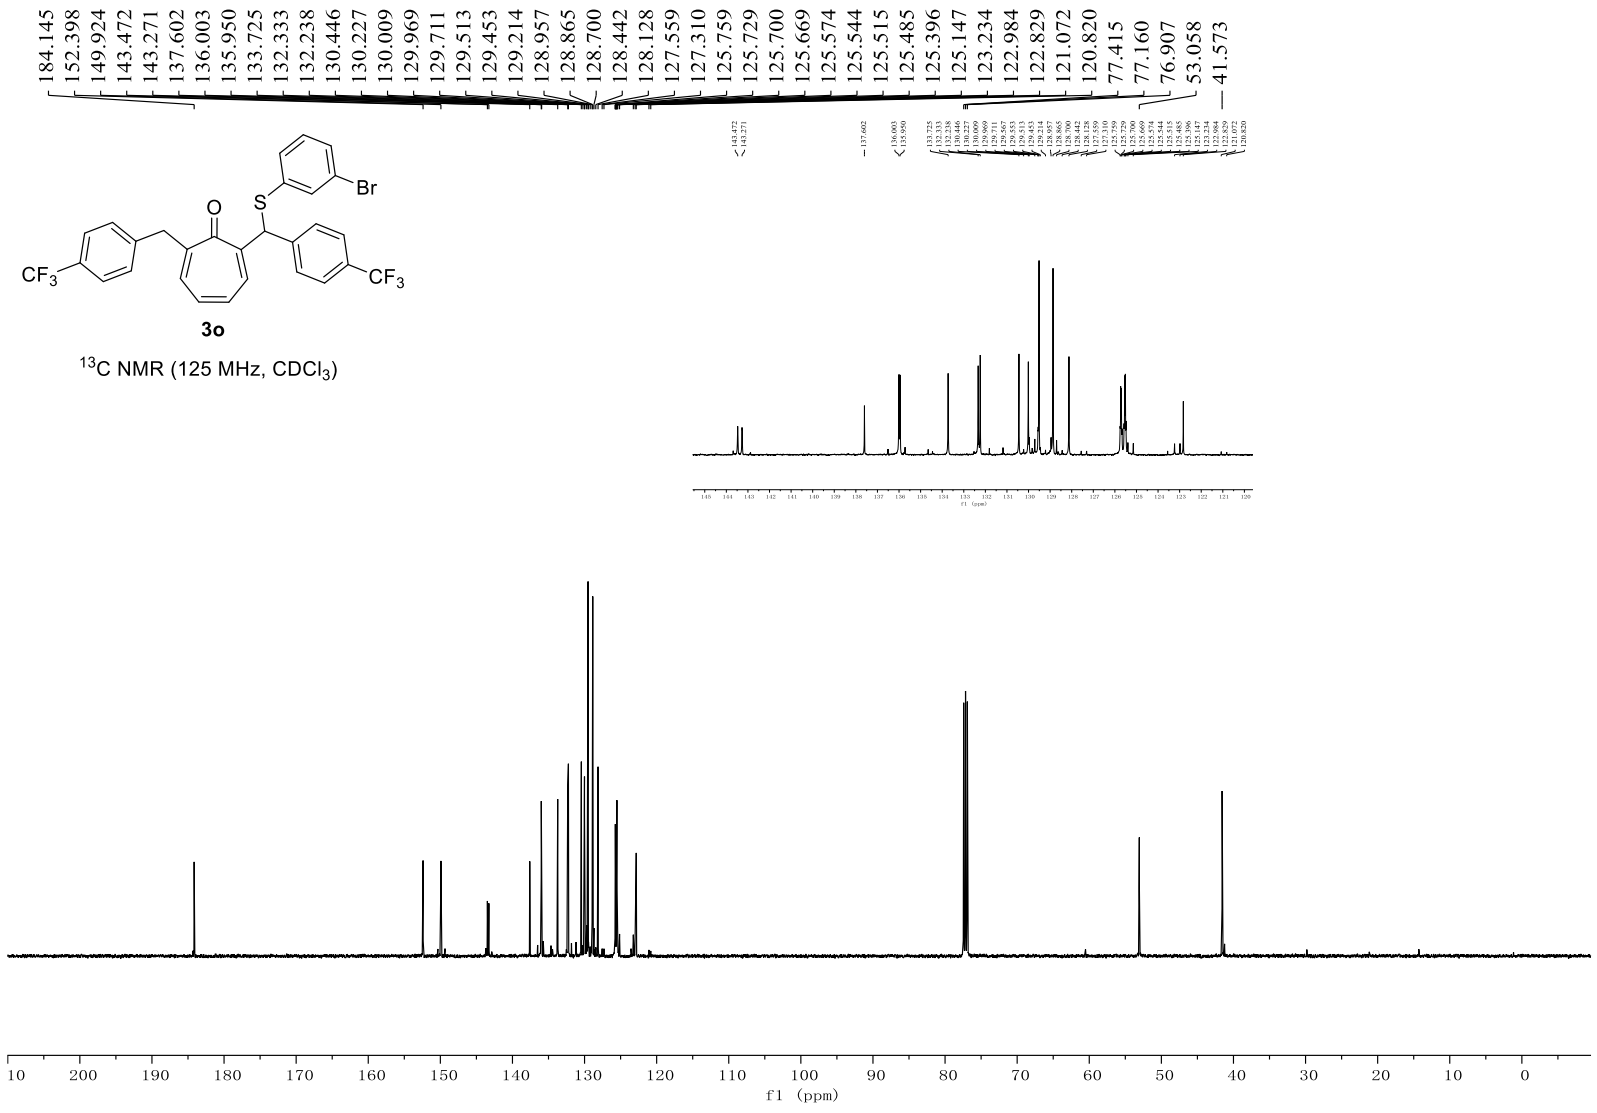

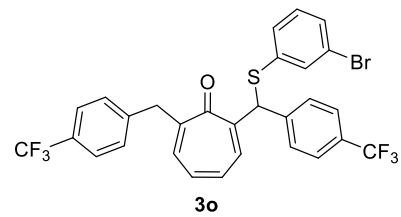

<sup>19</sup>F NMR (471 MHz, CDCl<sub>3</sub>)

-62.329  
-62.493

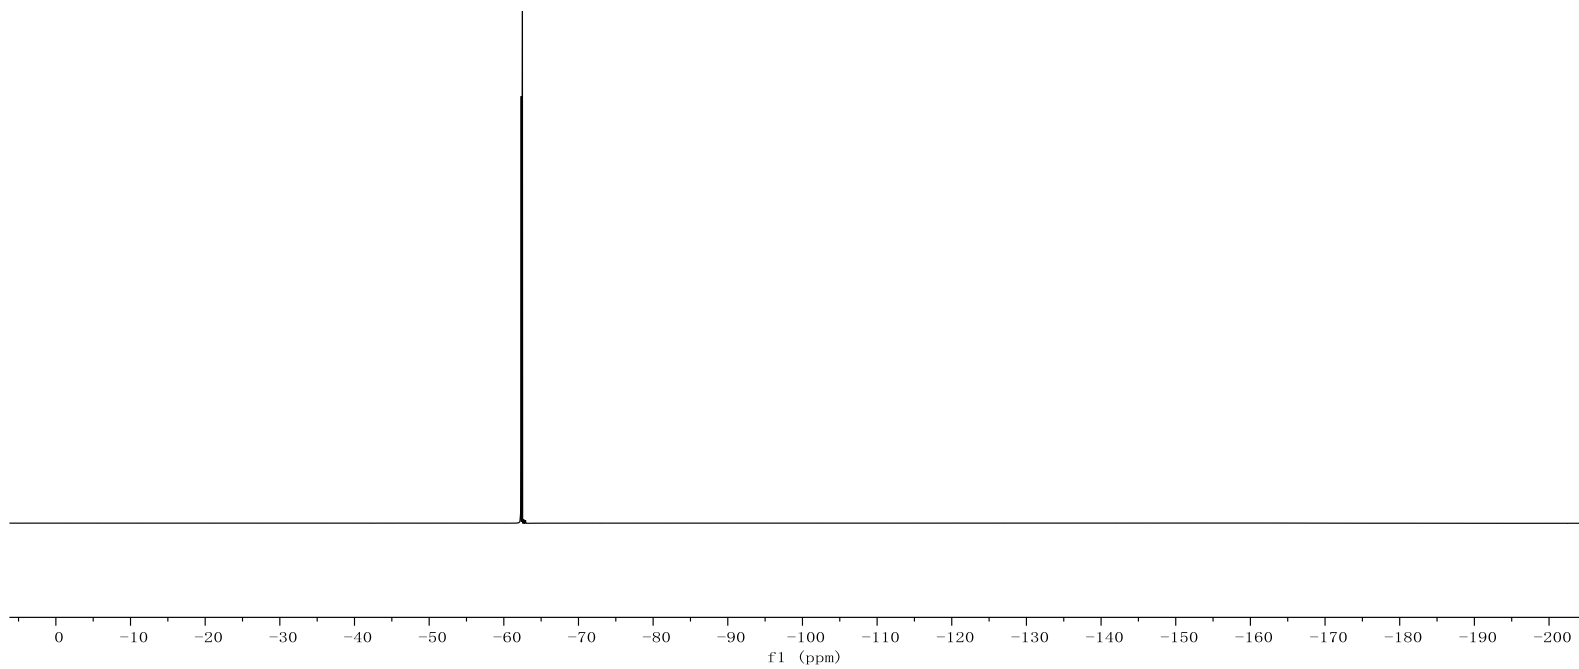

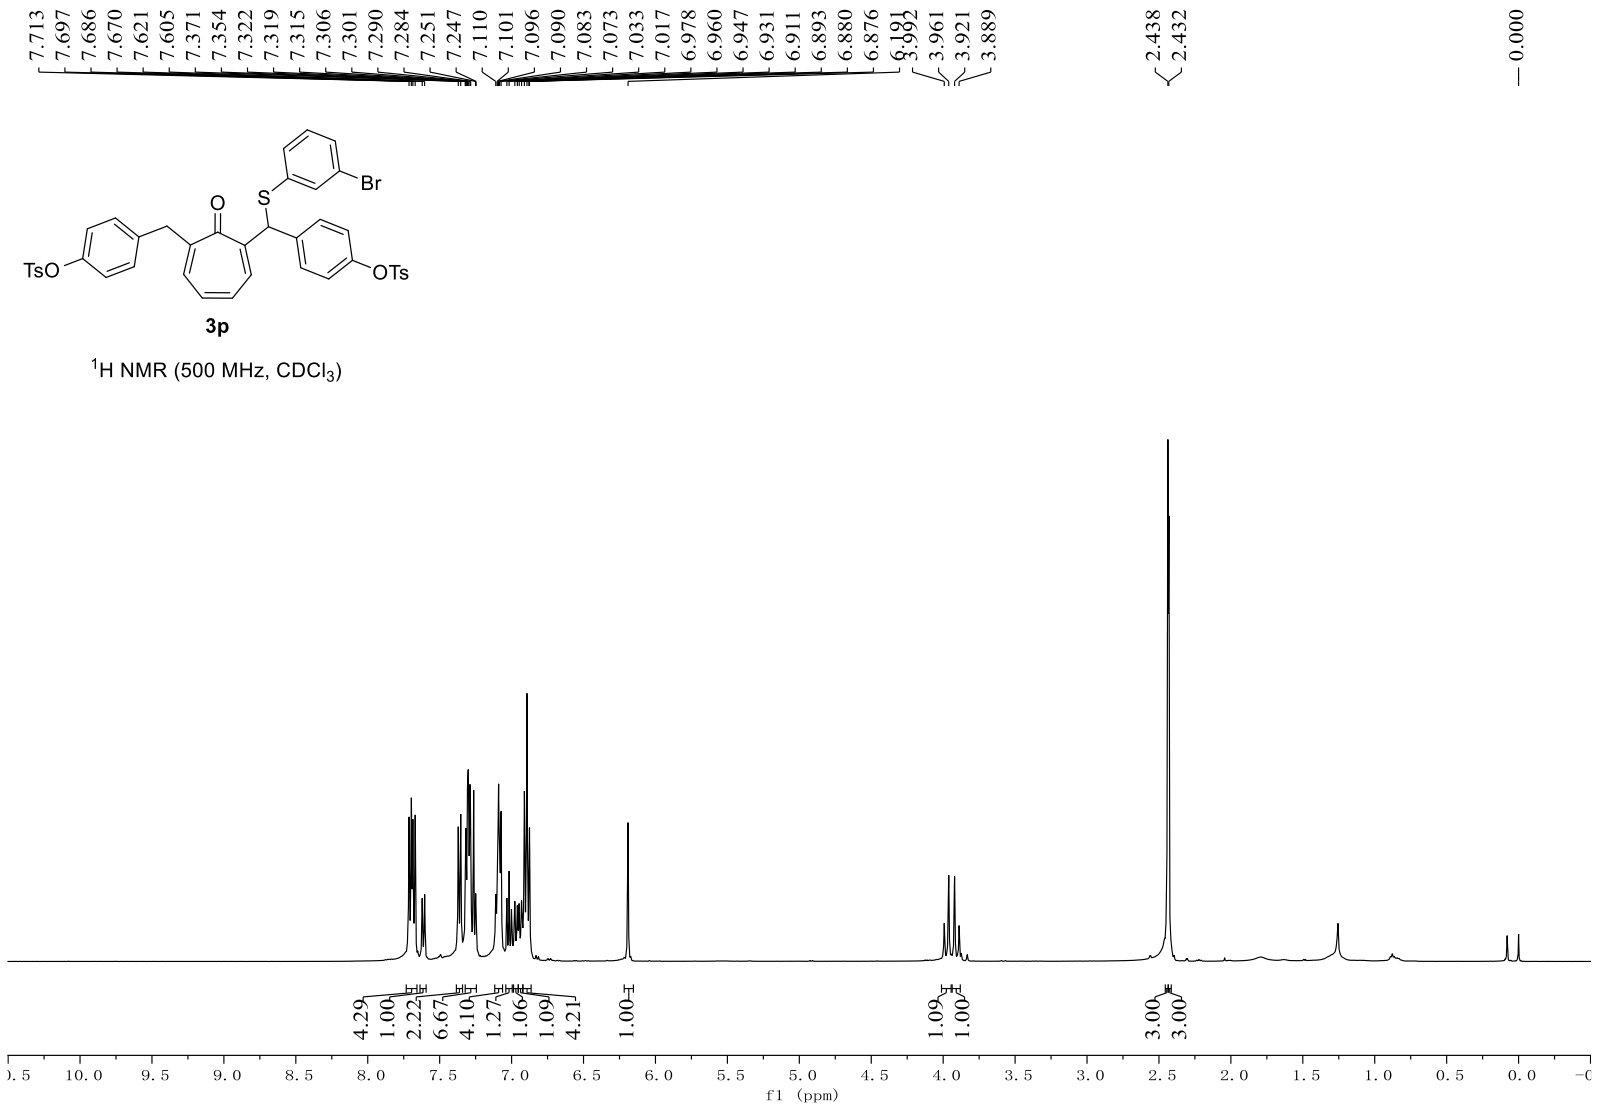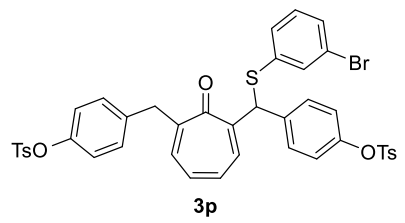

<sup>1</sup>H NMR (500 MHz, CDCl<sub>3</sub>)

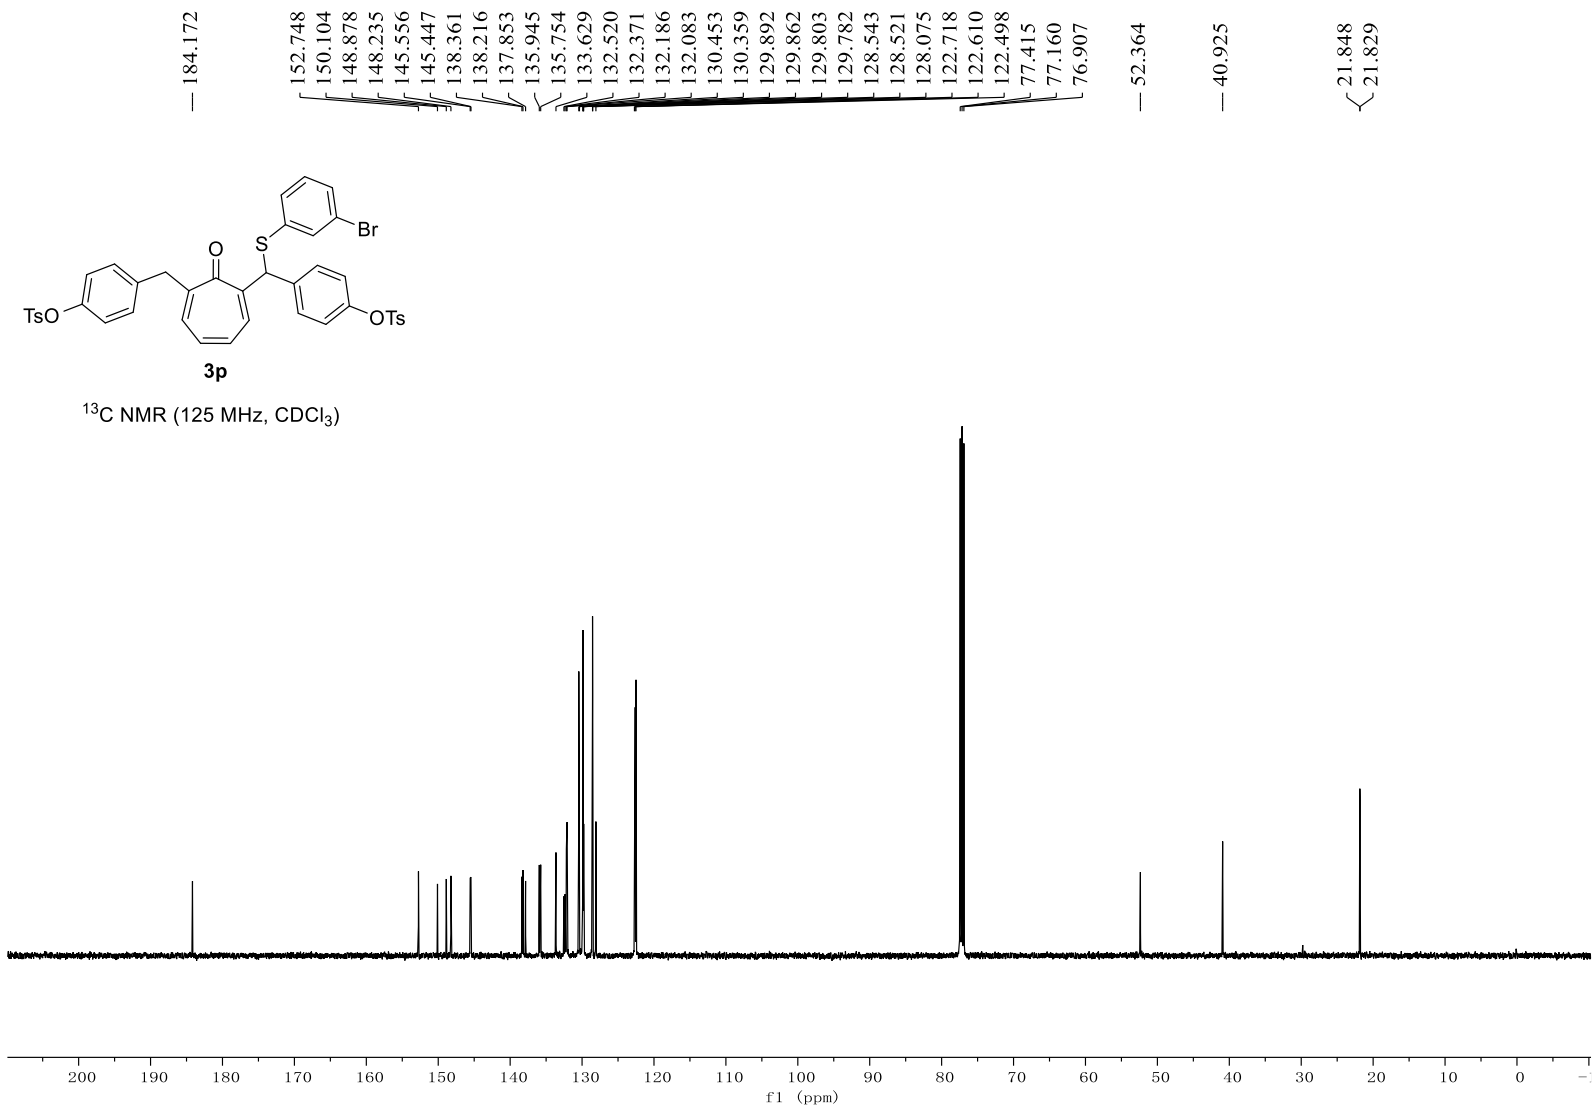

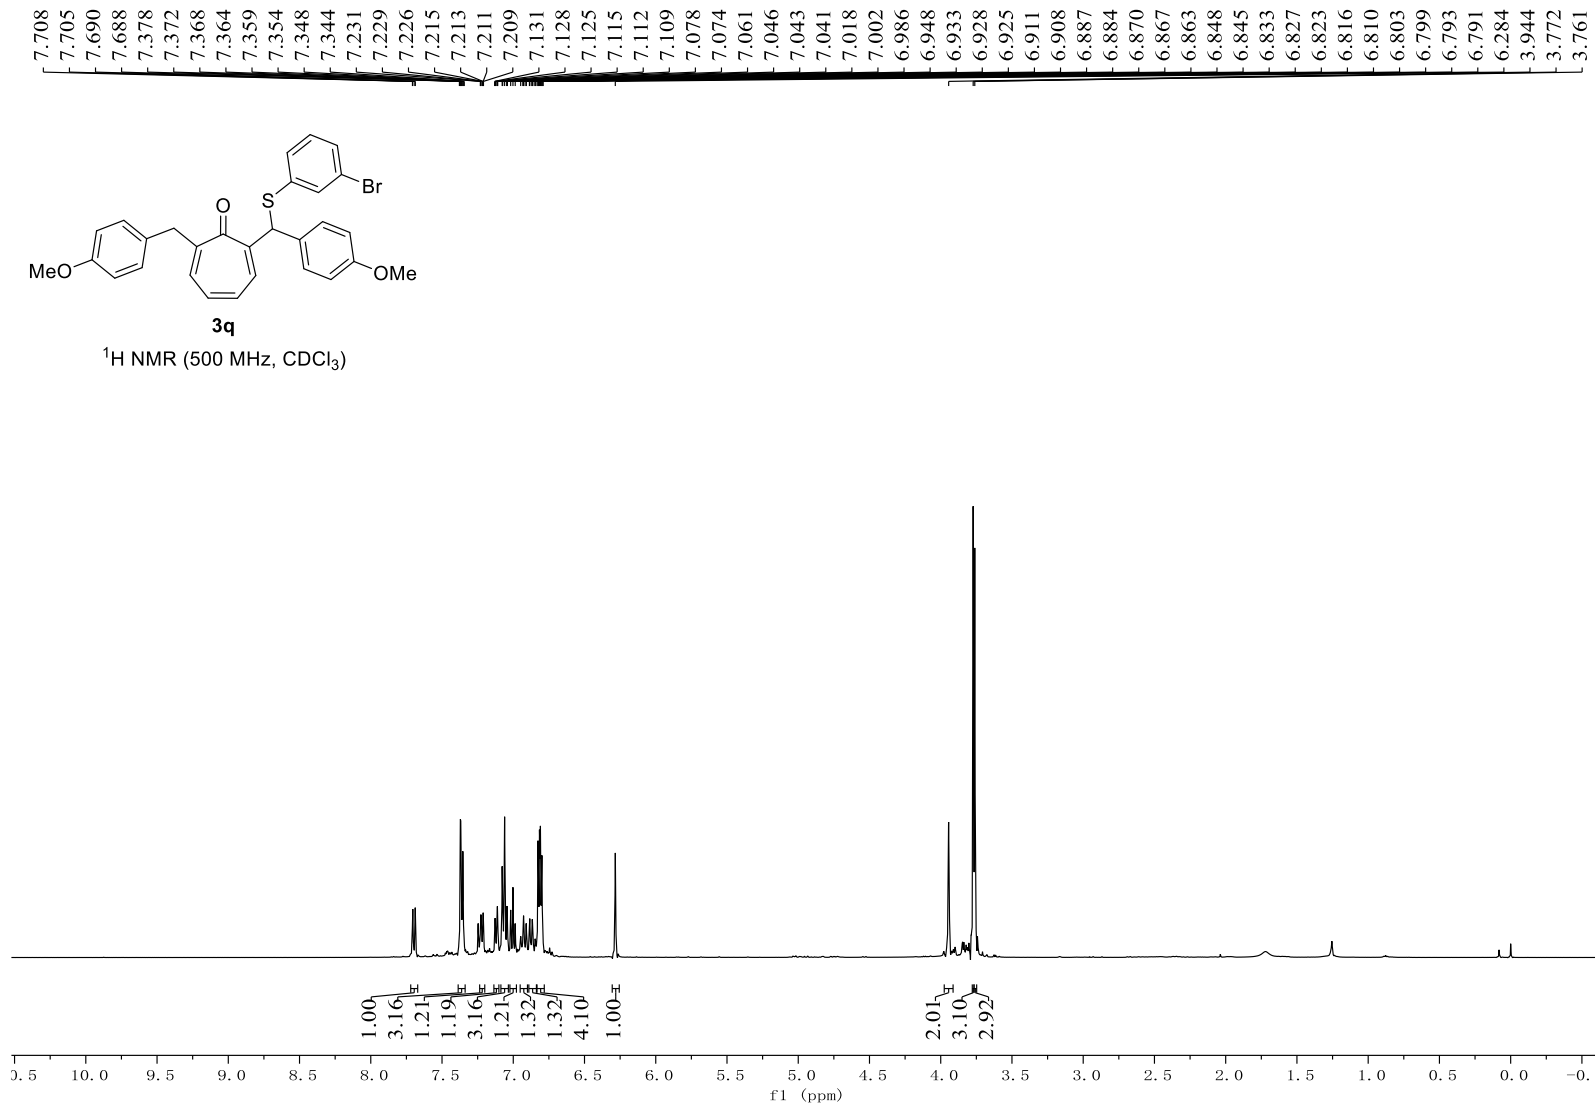

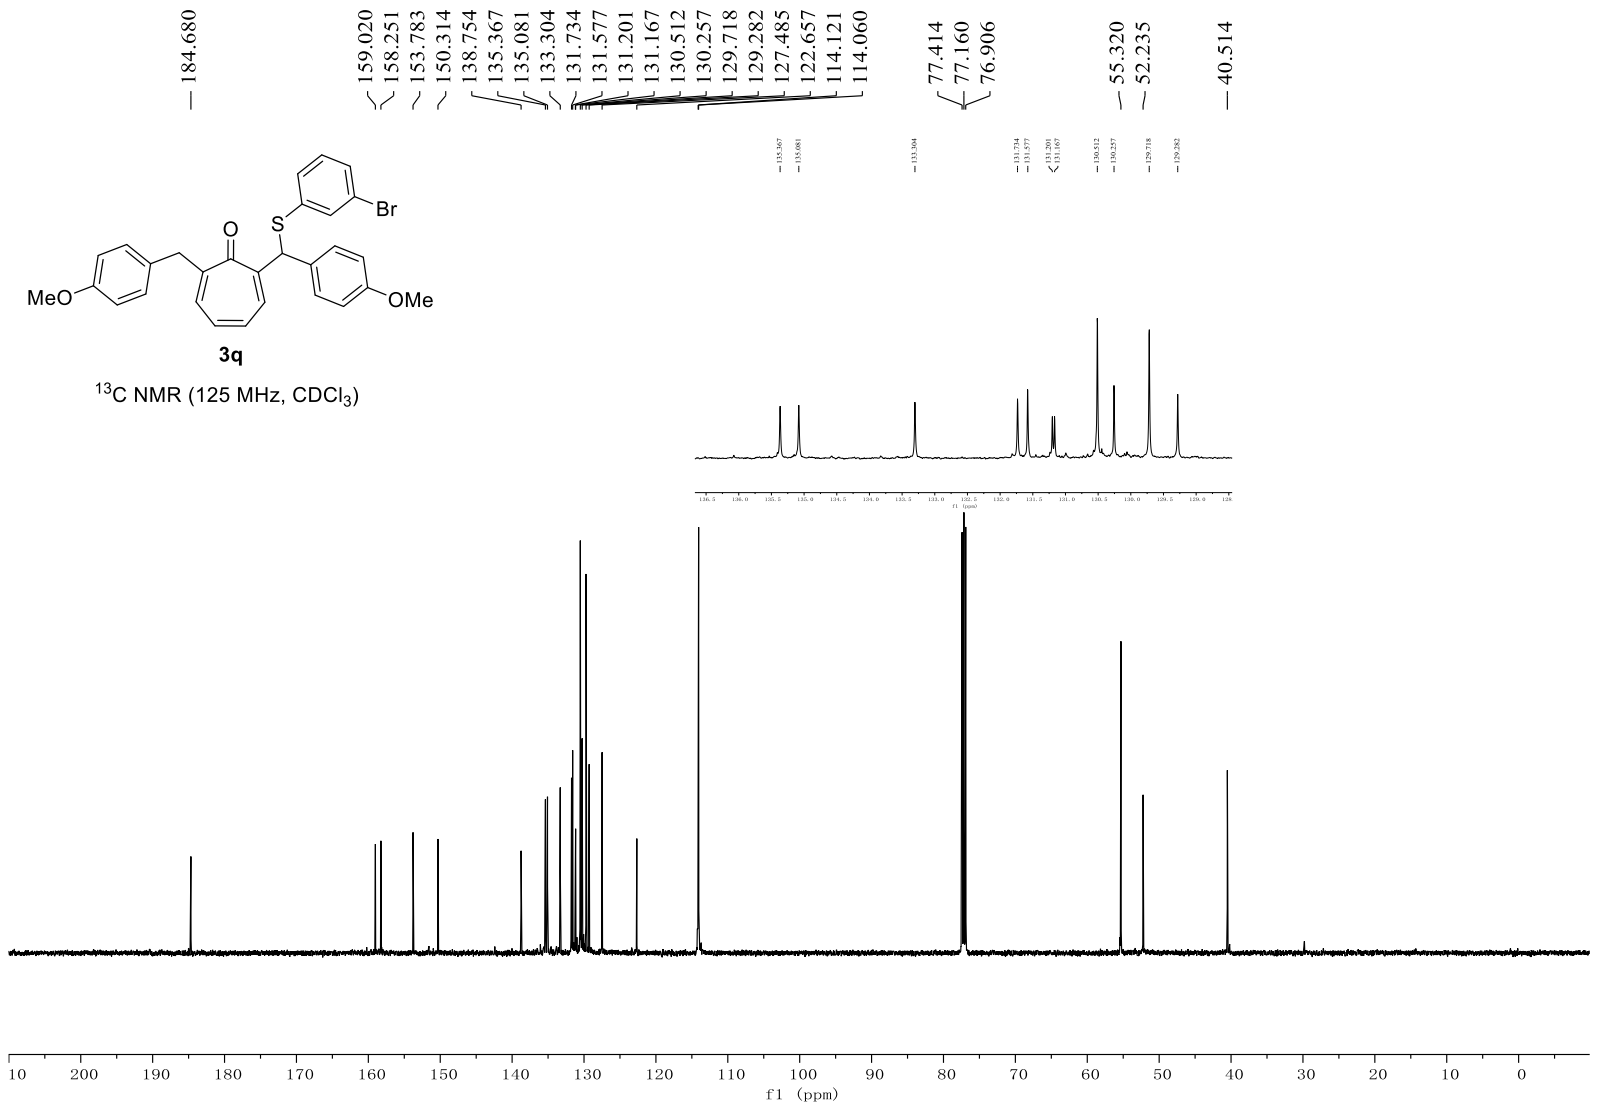

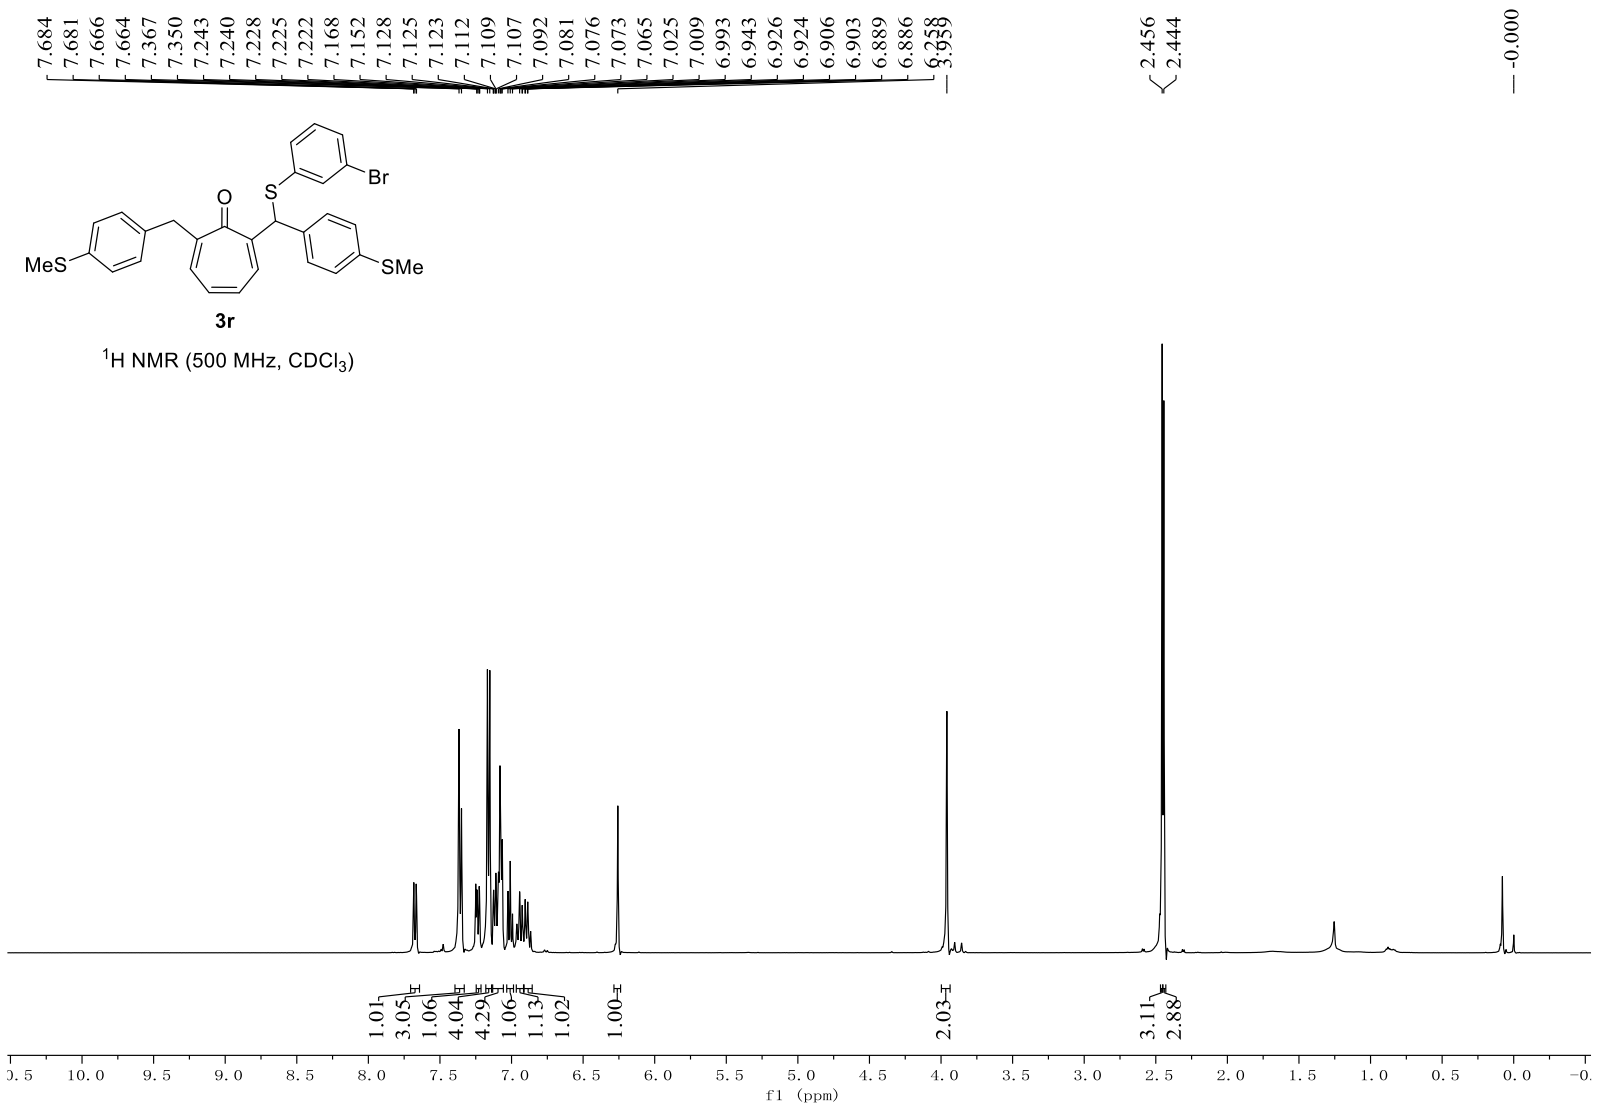



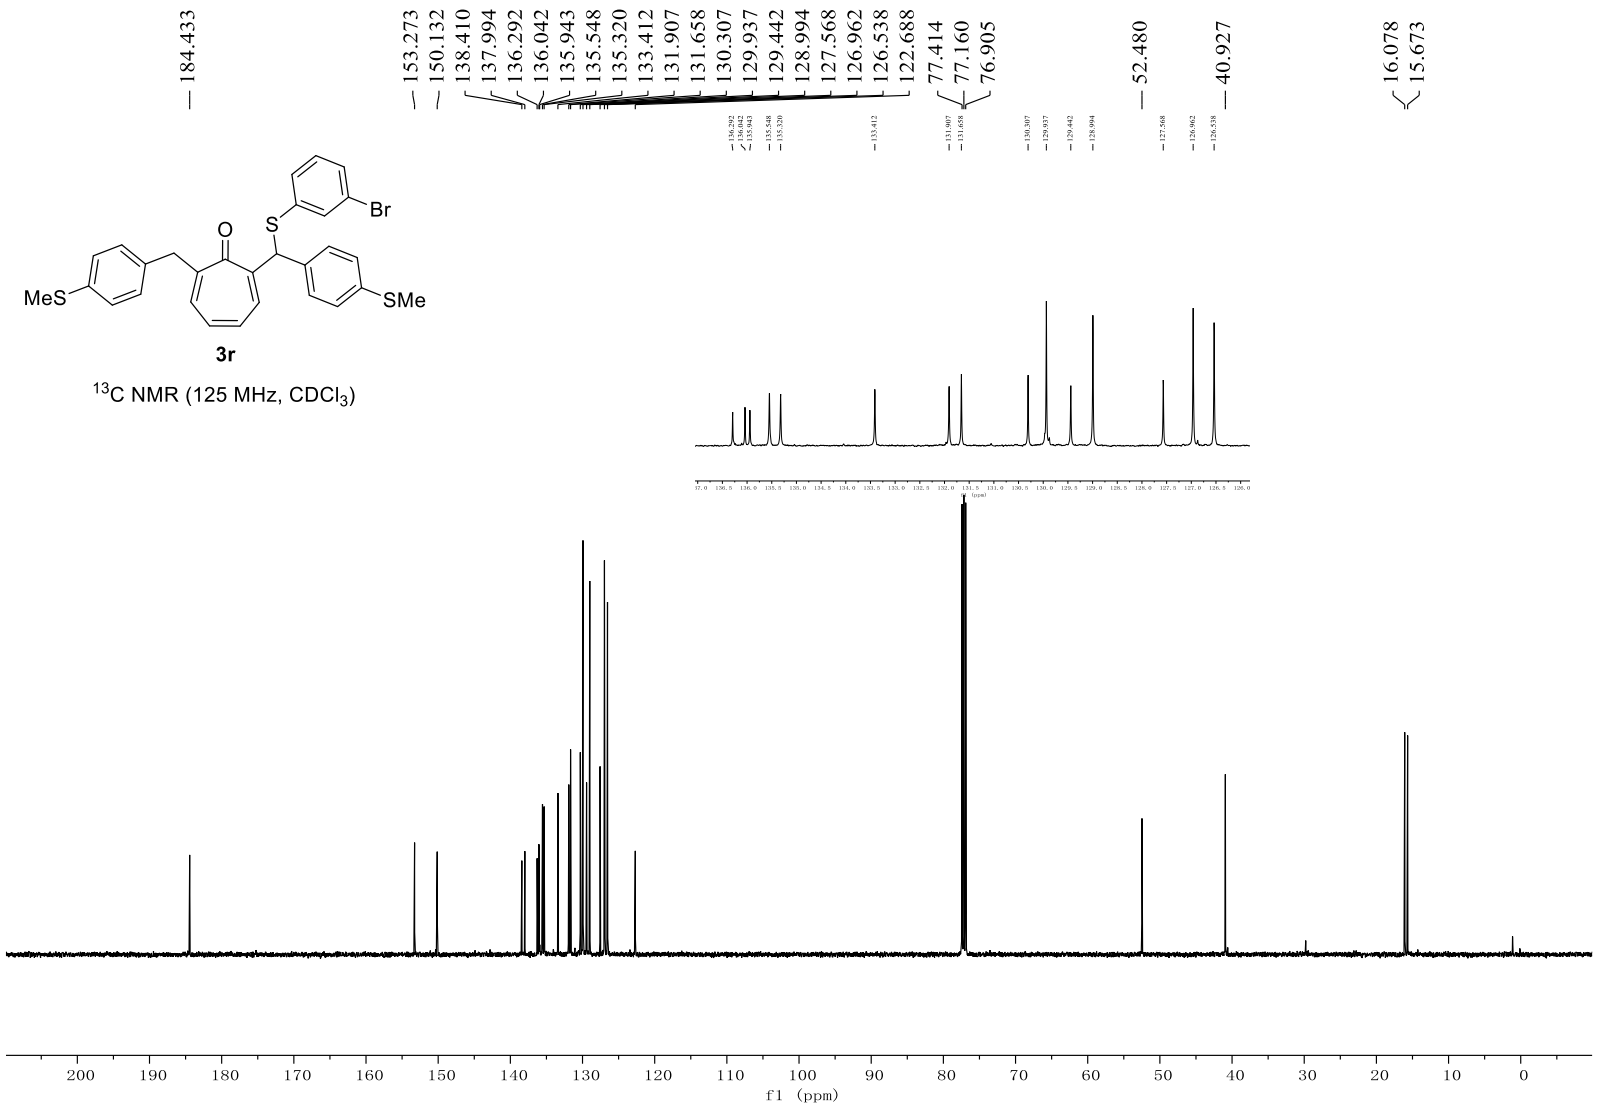

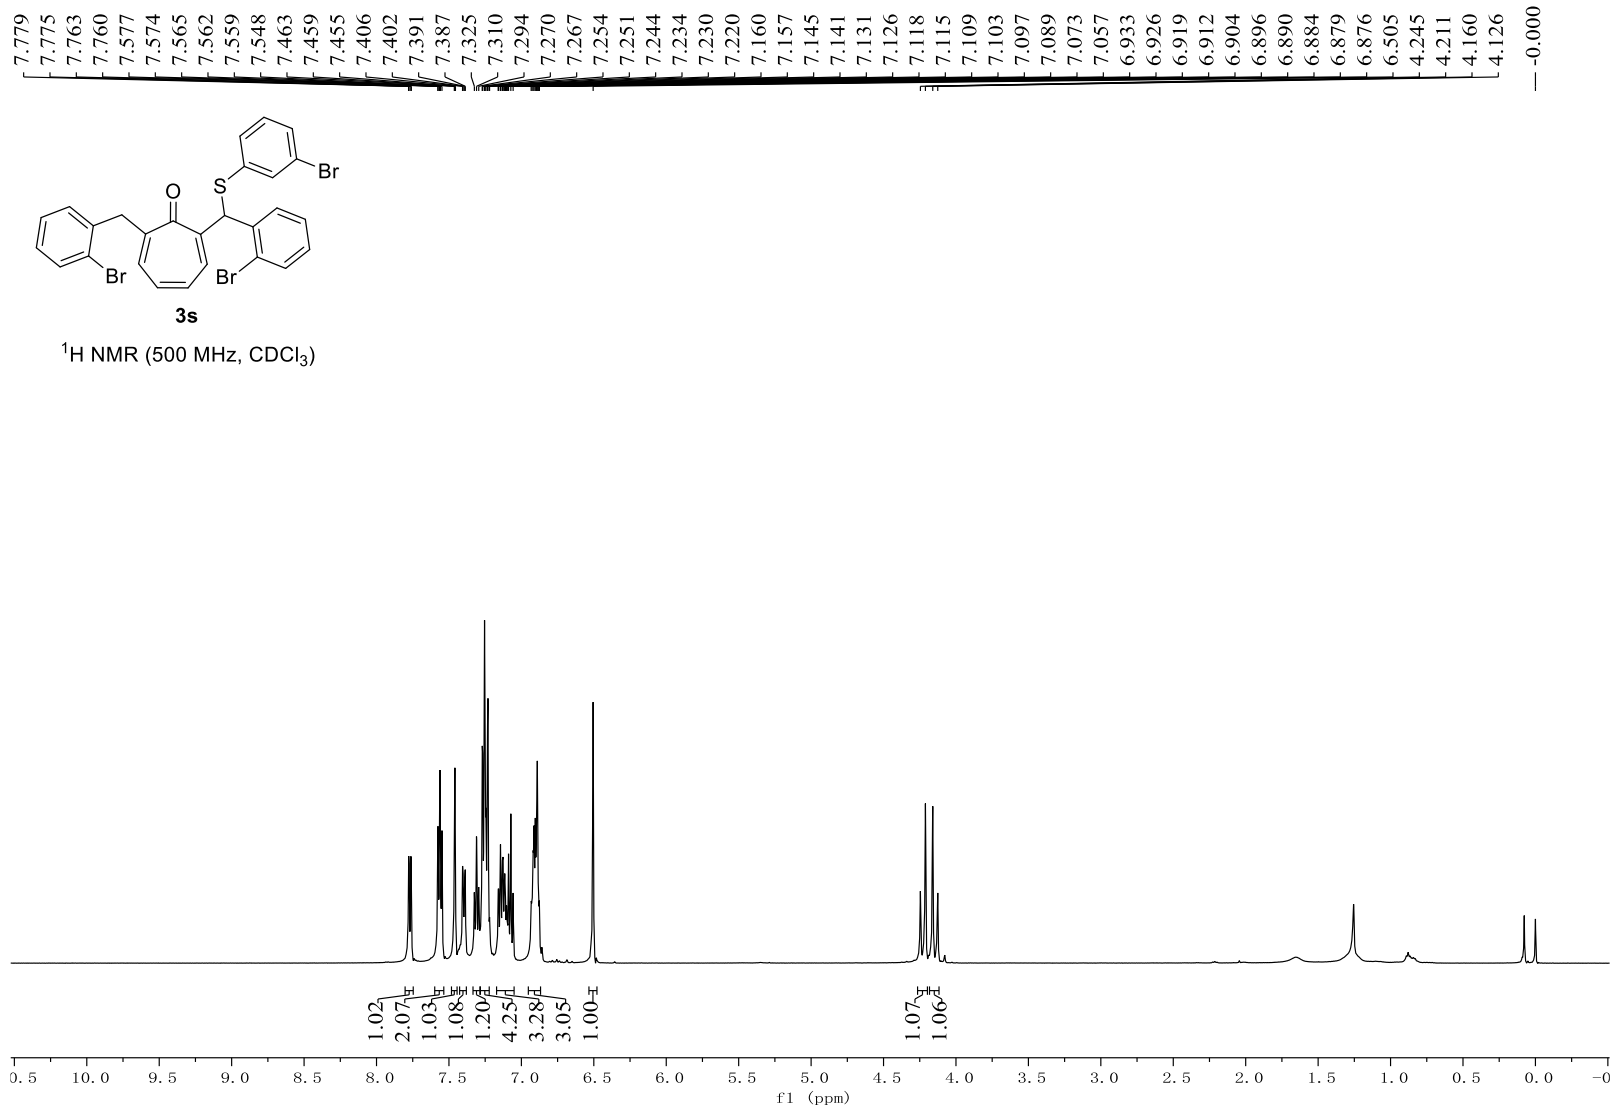

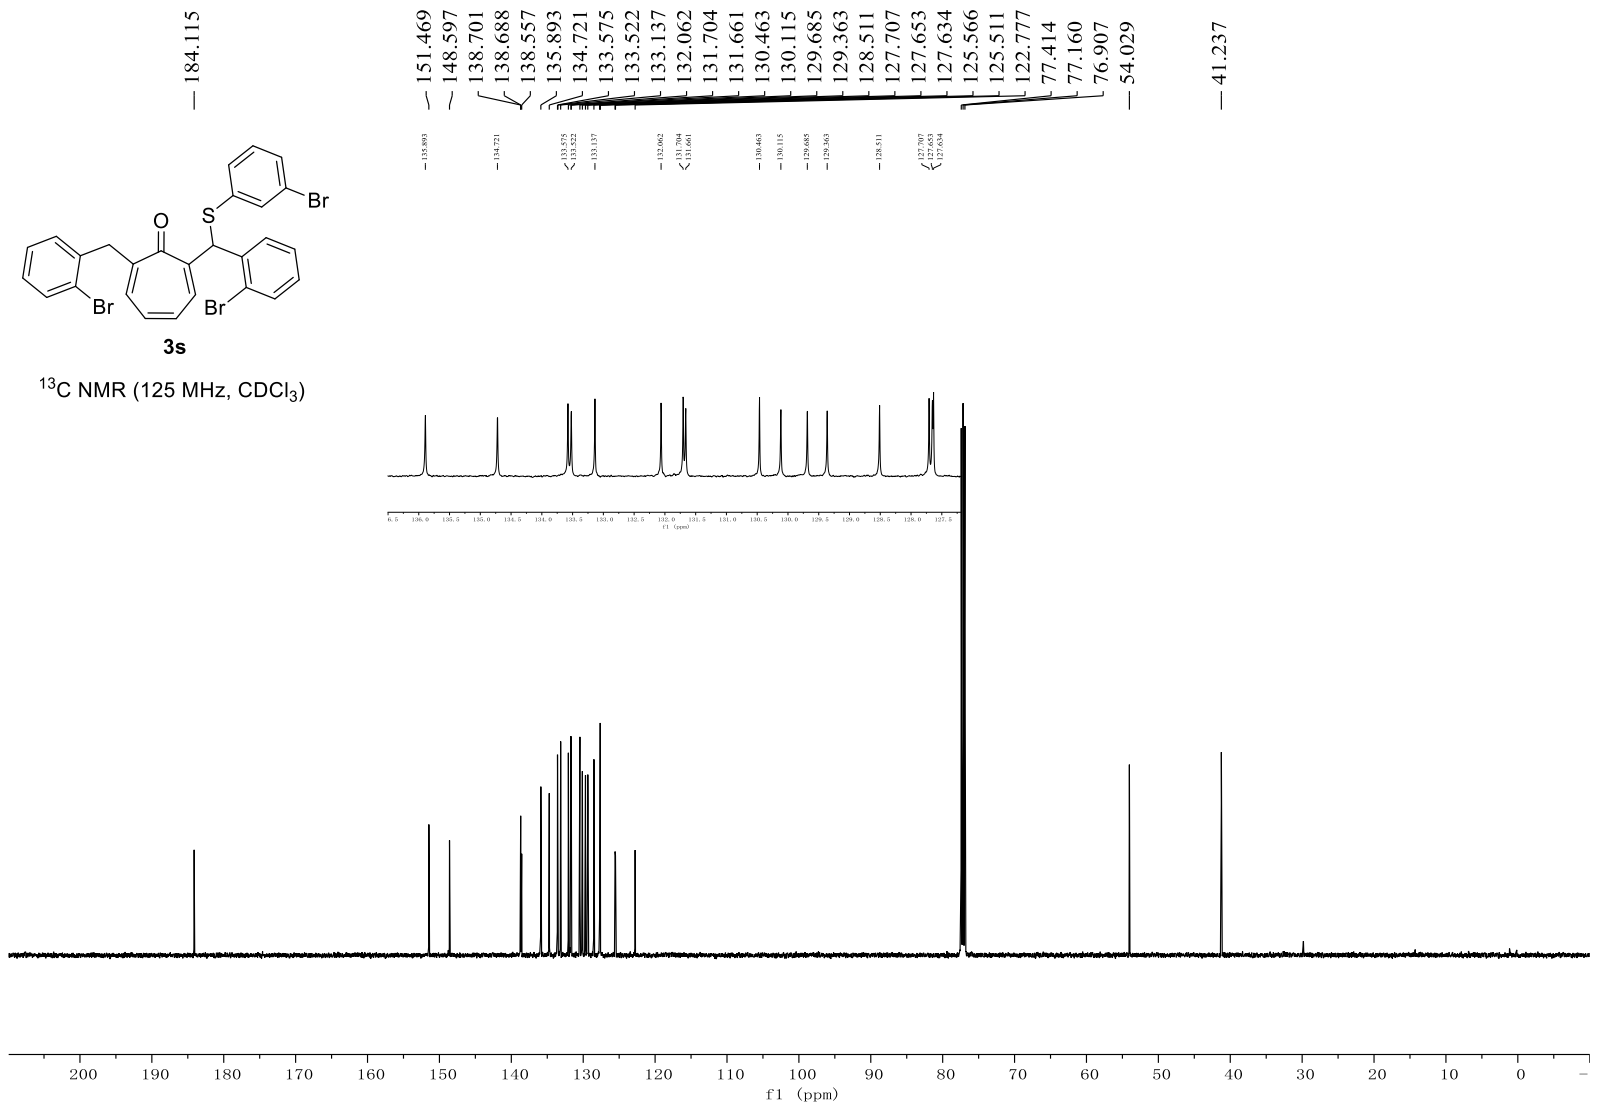

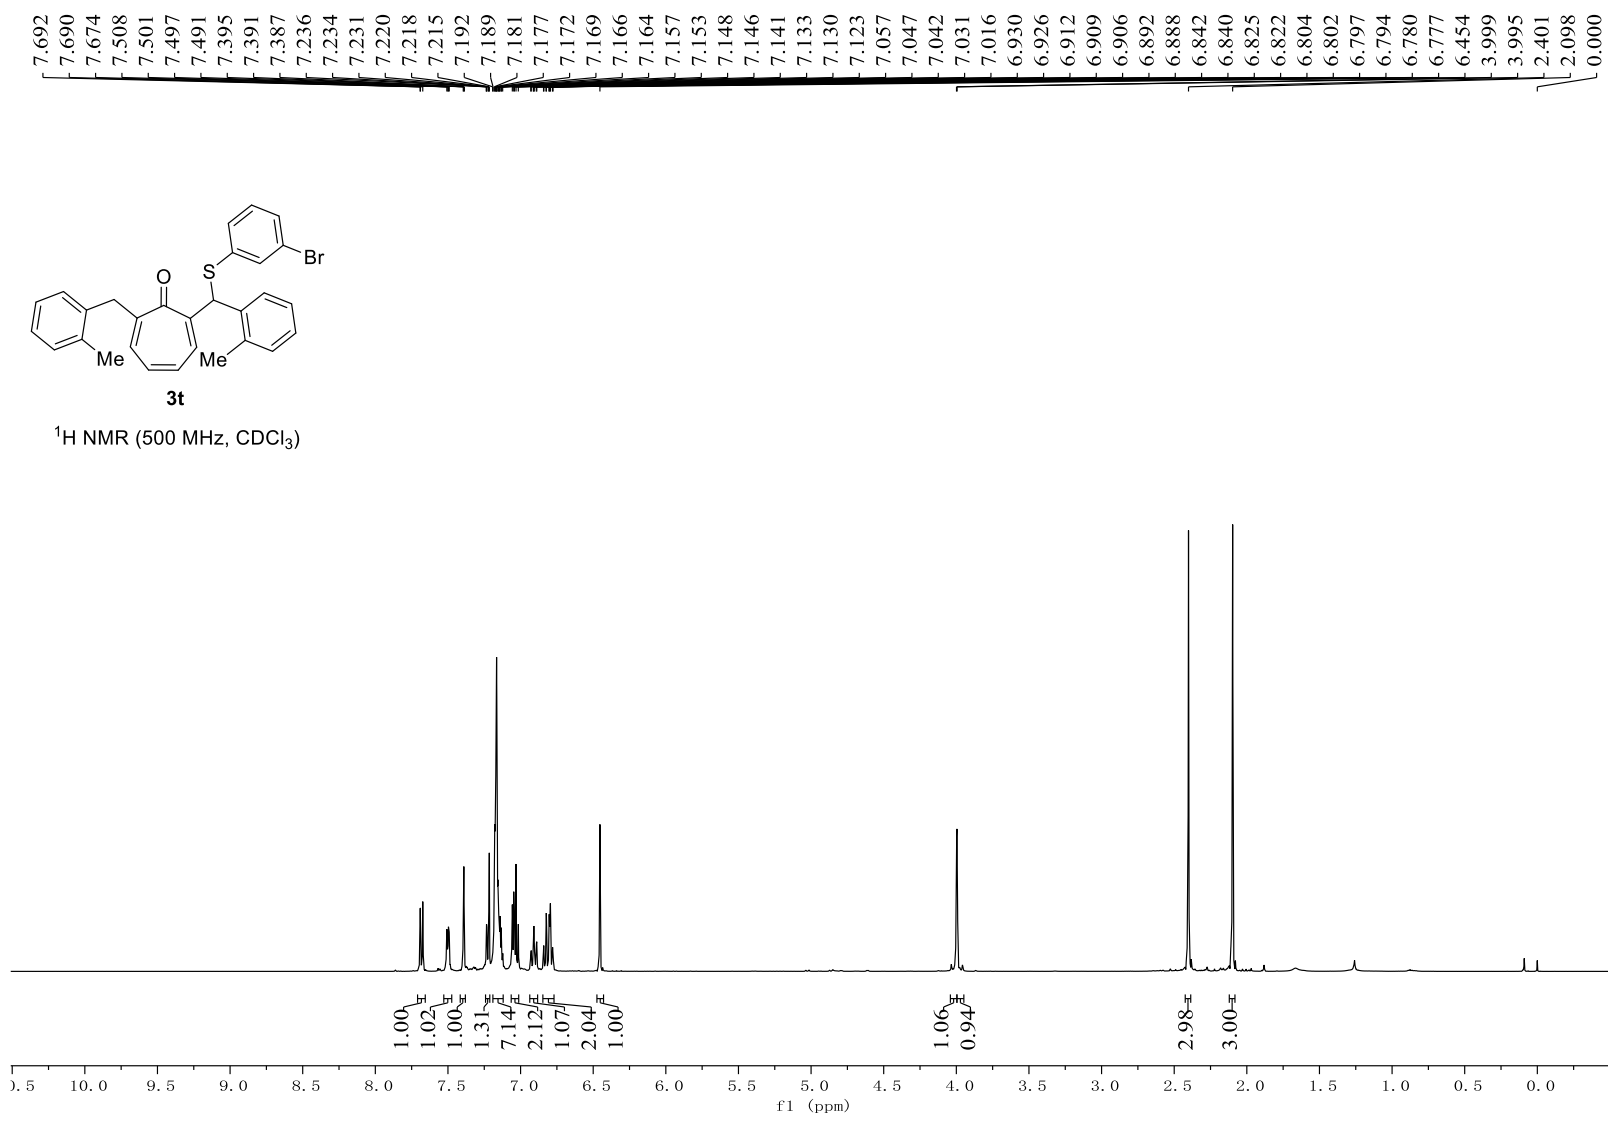

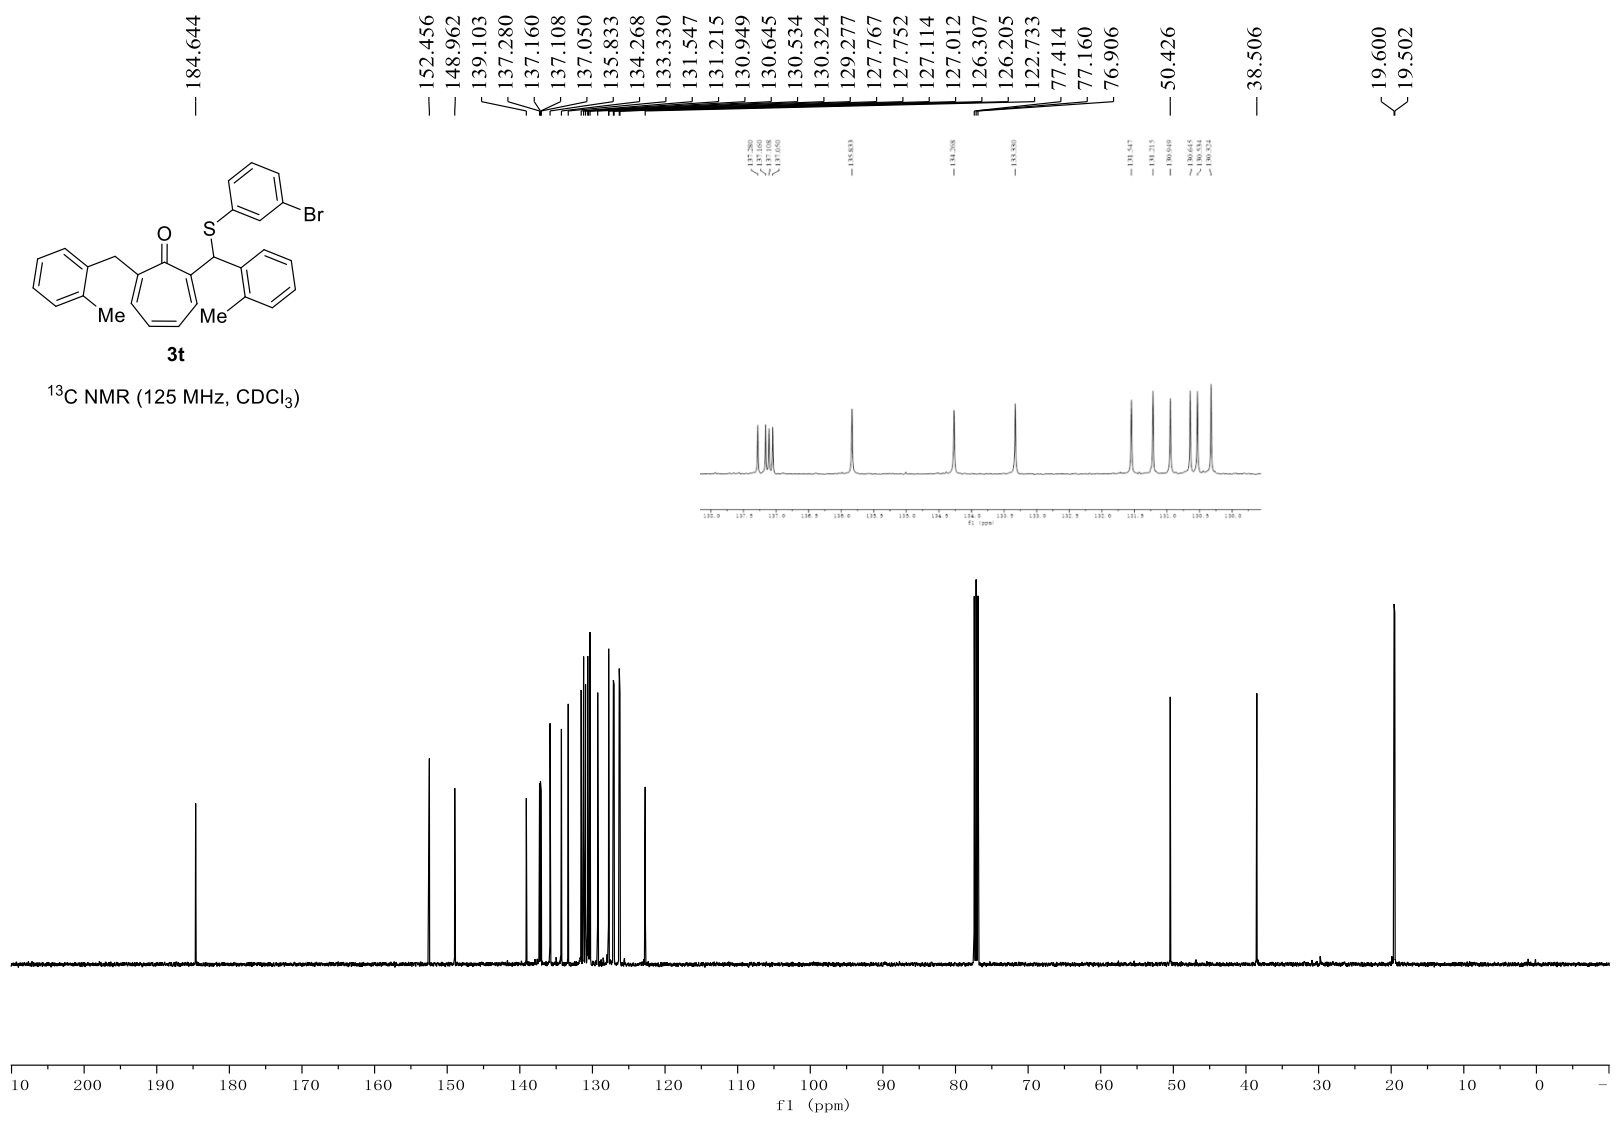

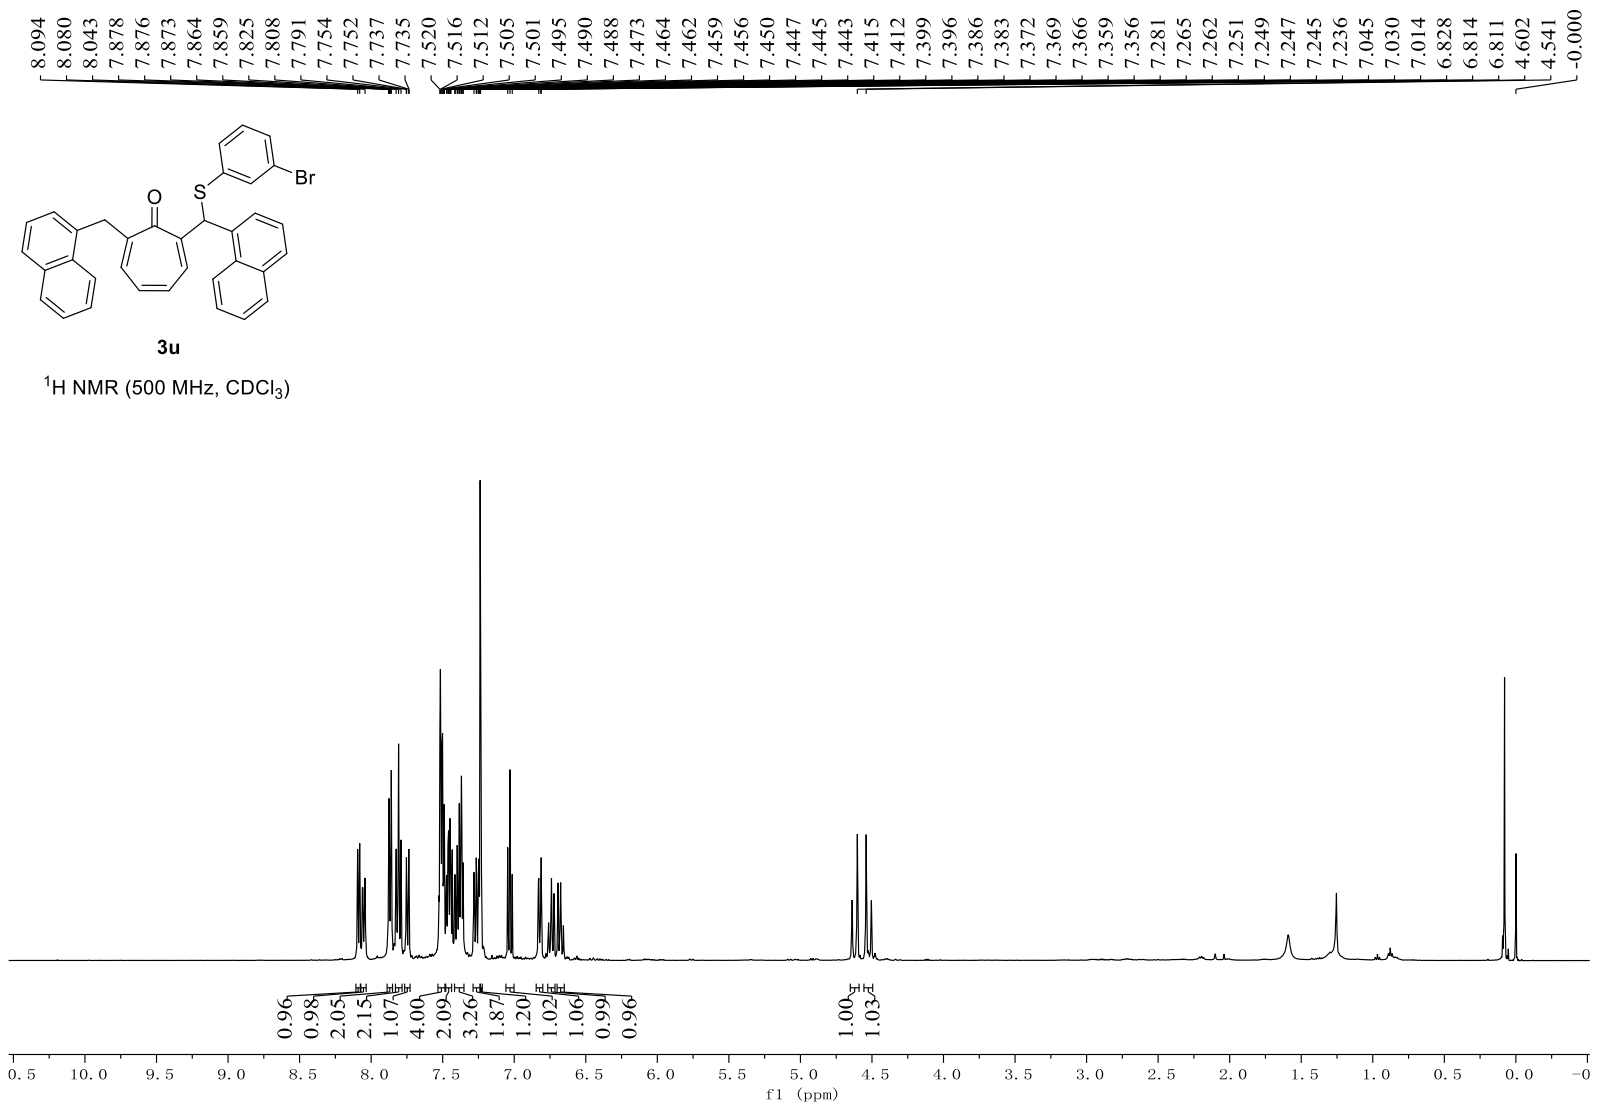

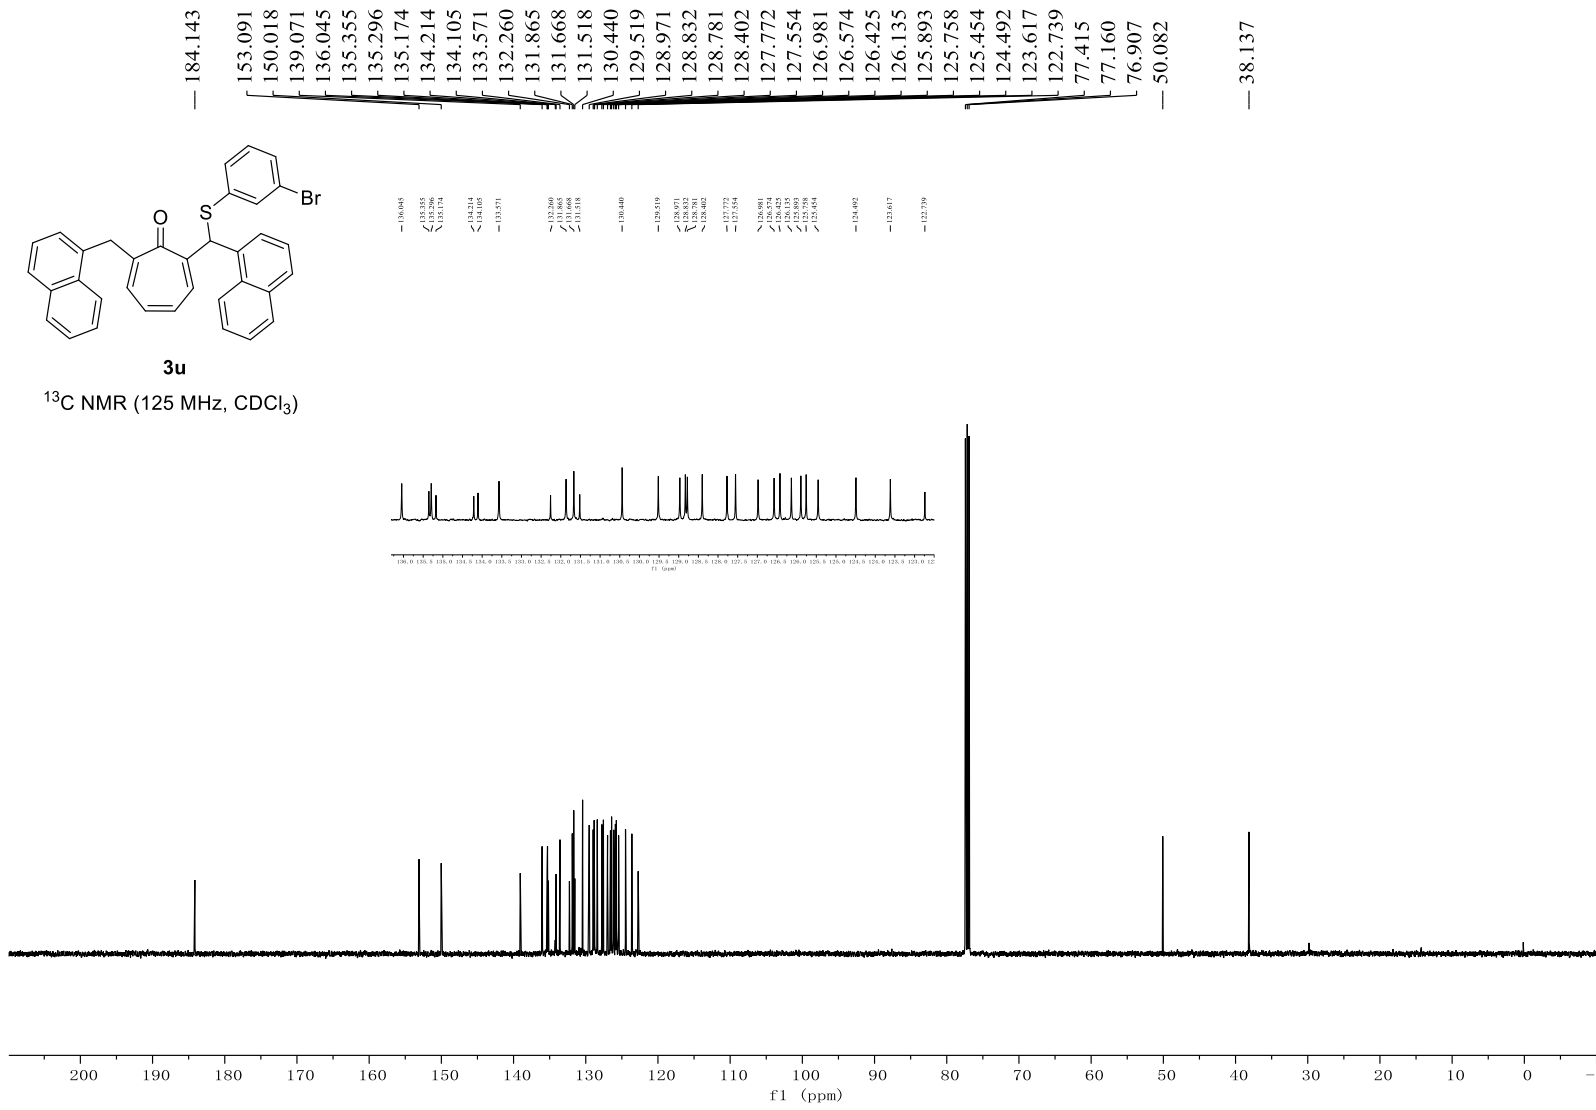

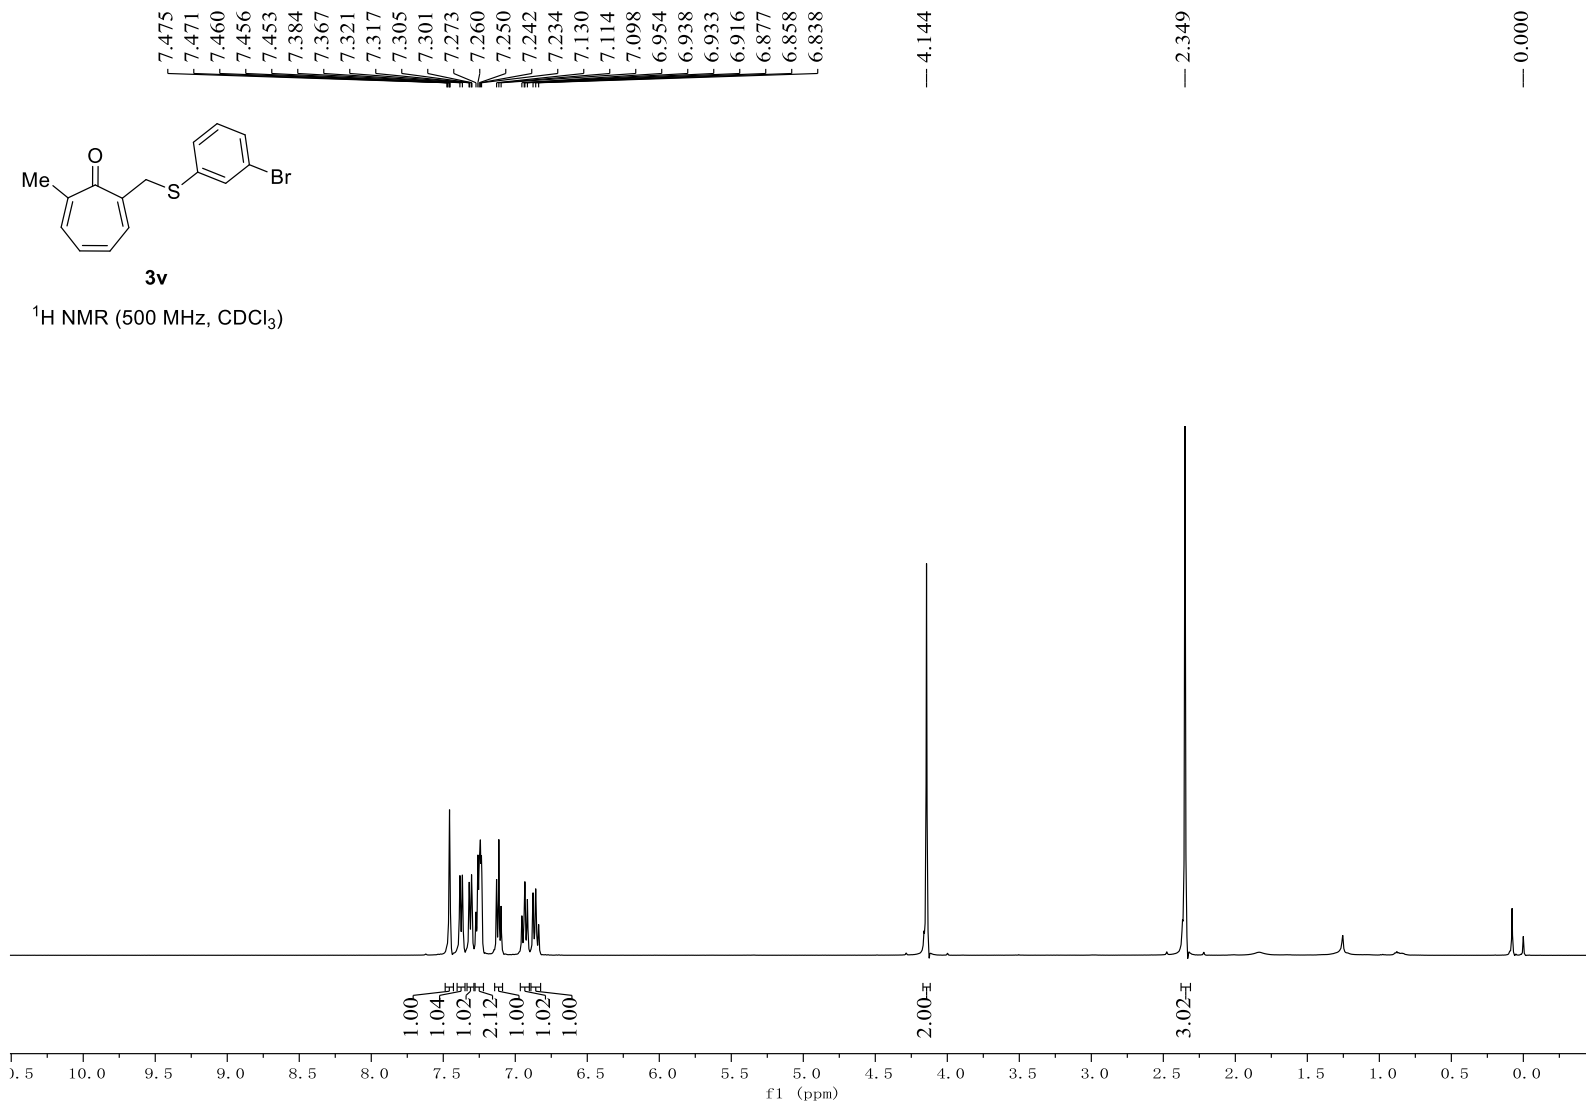



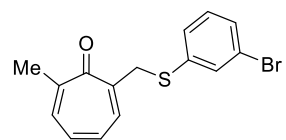

**3v**

$^{13}\text{C}$  NMR (125 MHz,  $\text{CDCl}_3$ )

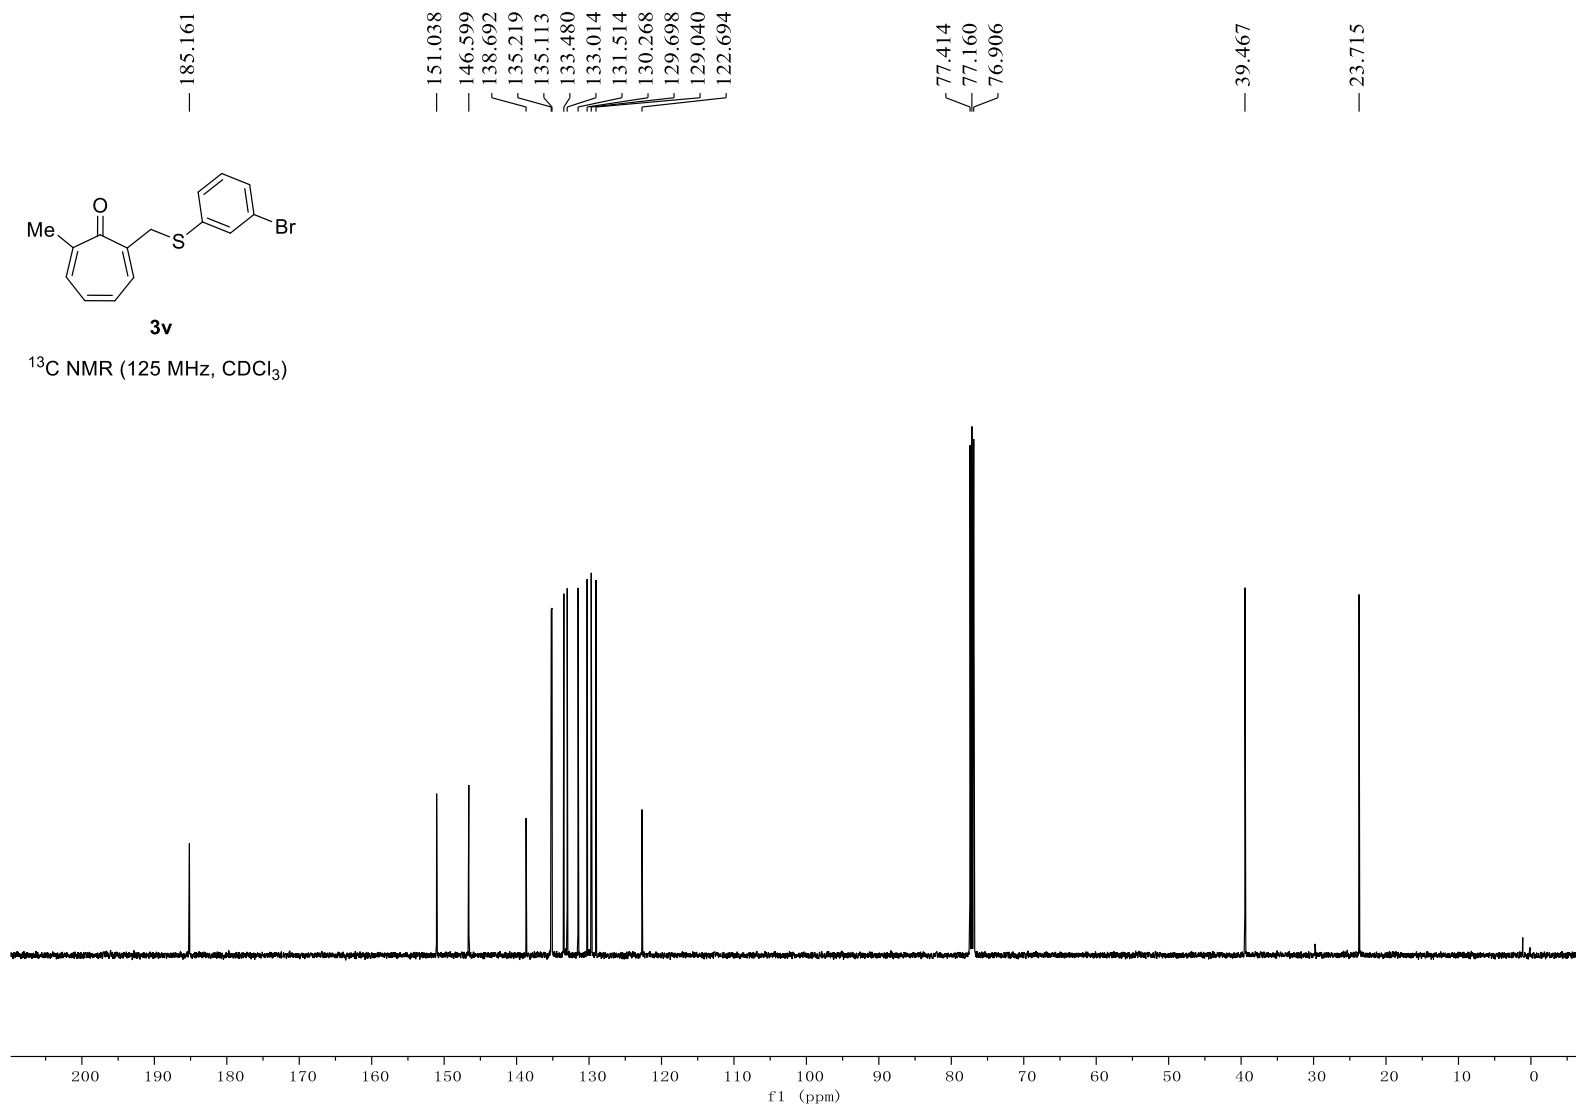

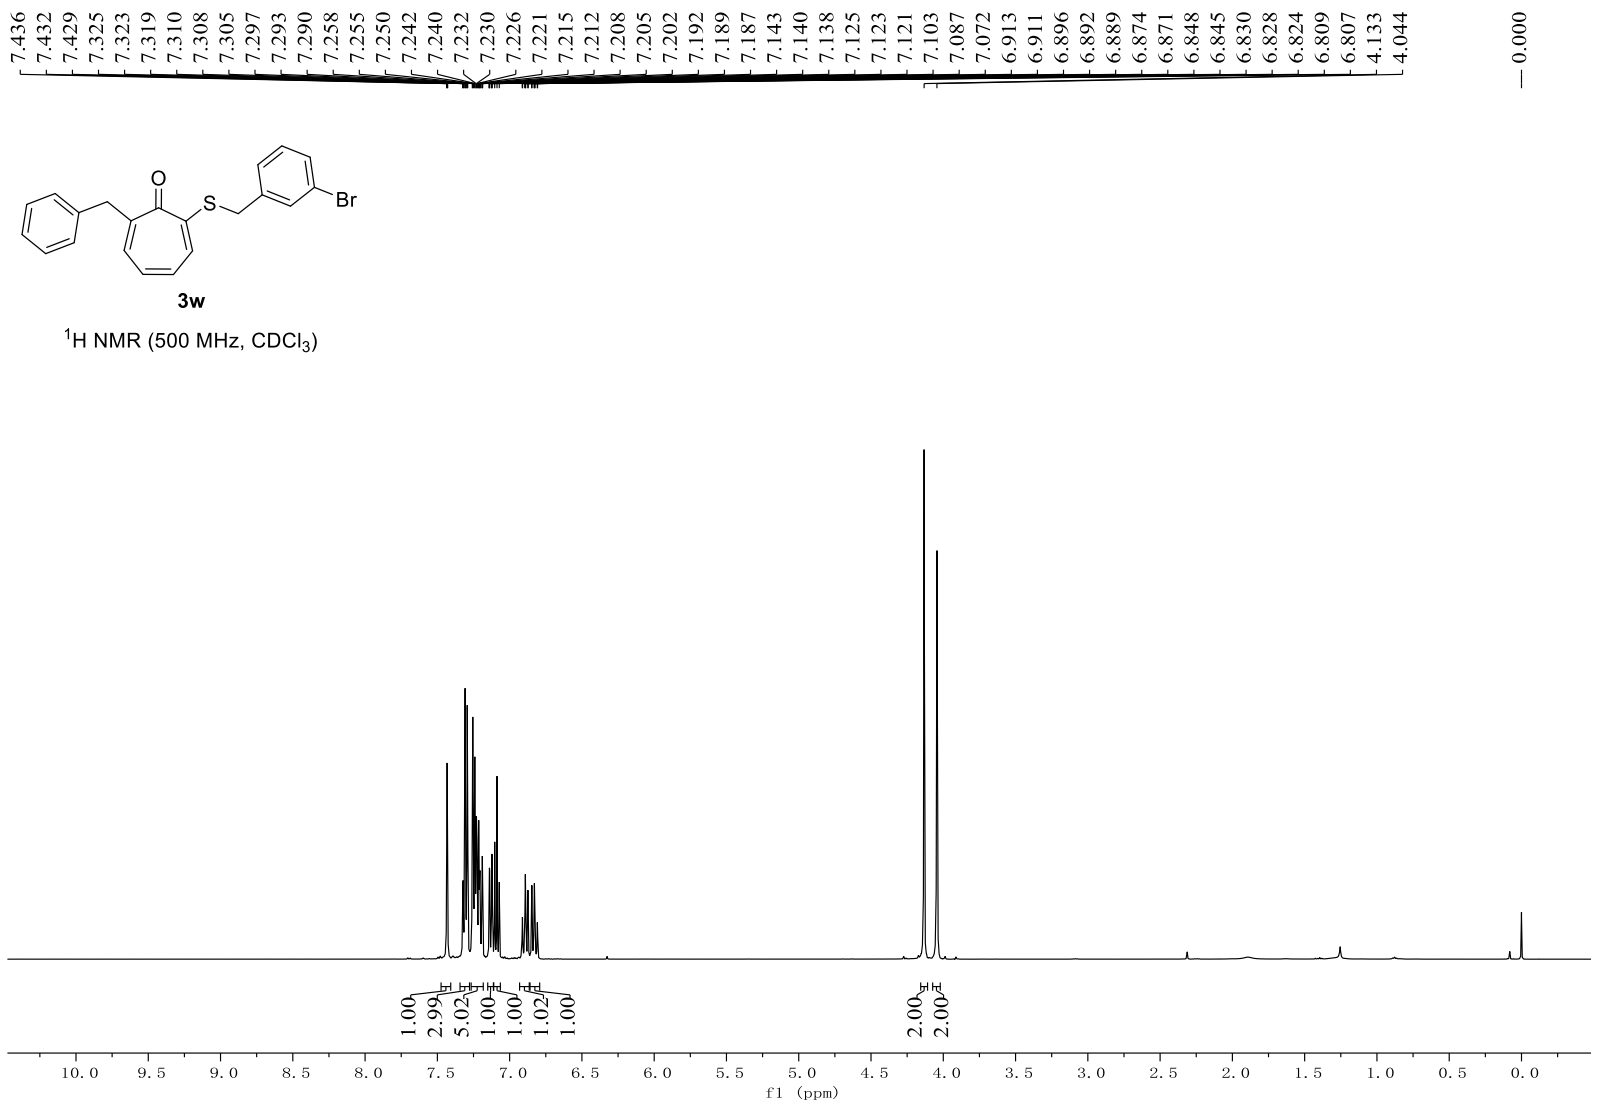

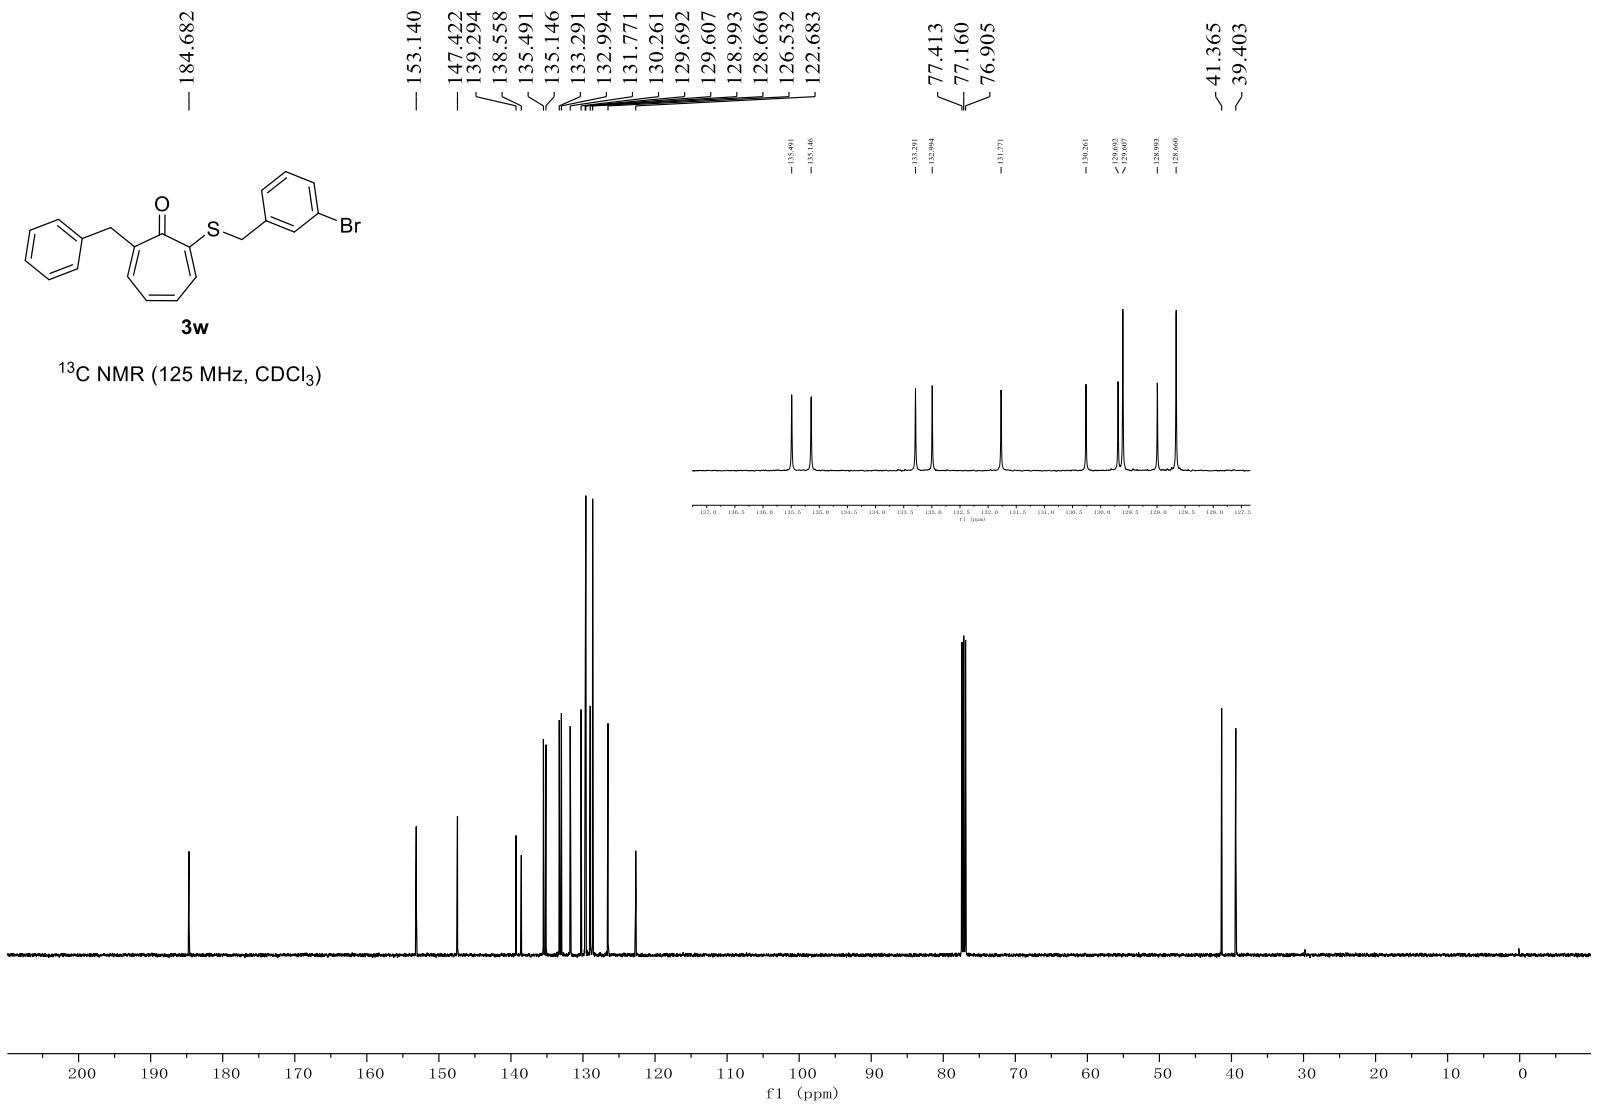

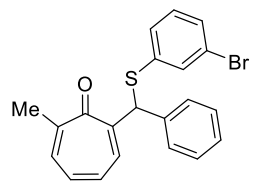

**3w'**

<sup>1</sup>H NMR (500 MHz, CDCl<sub>3</sub>)

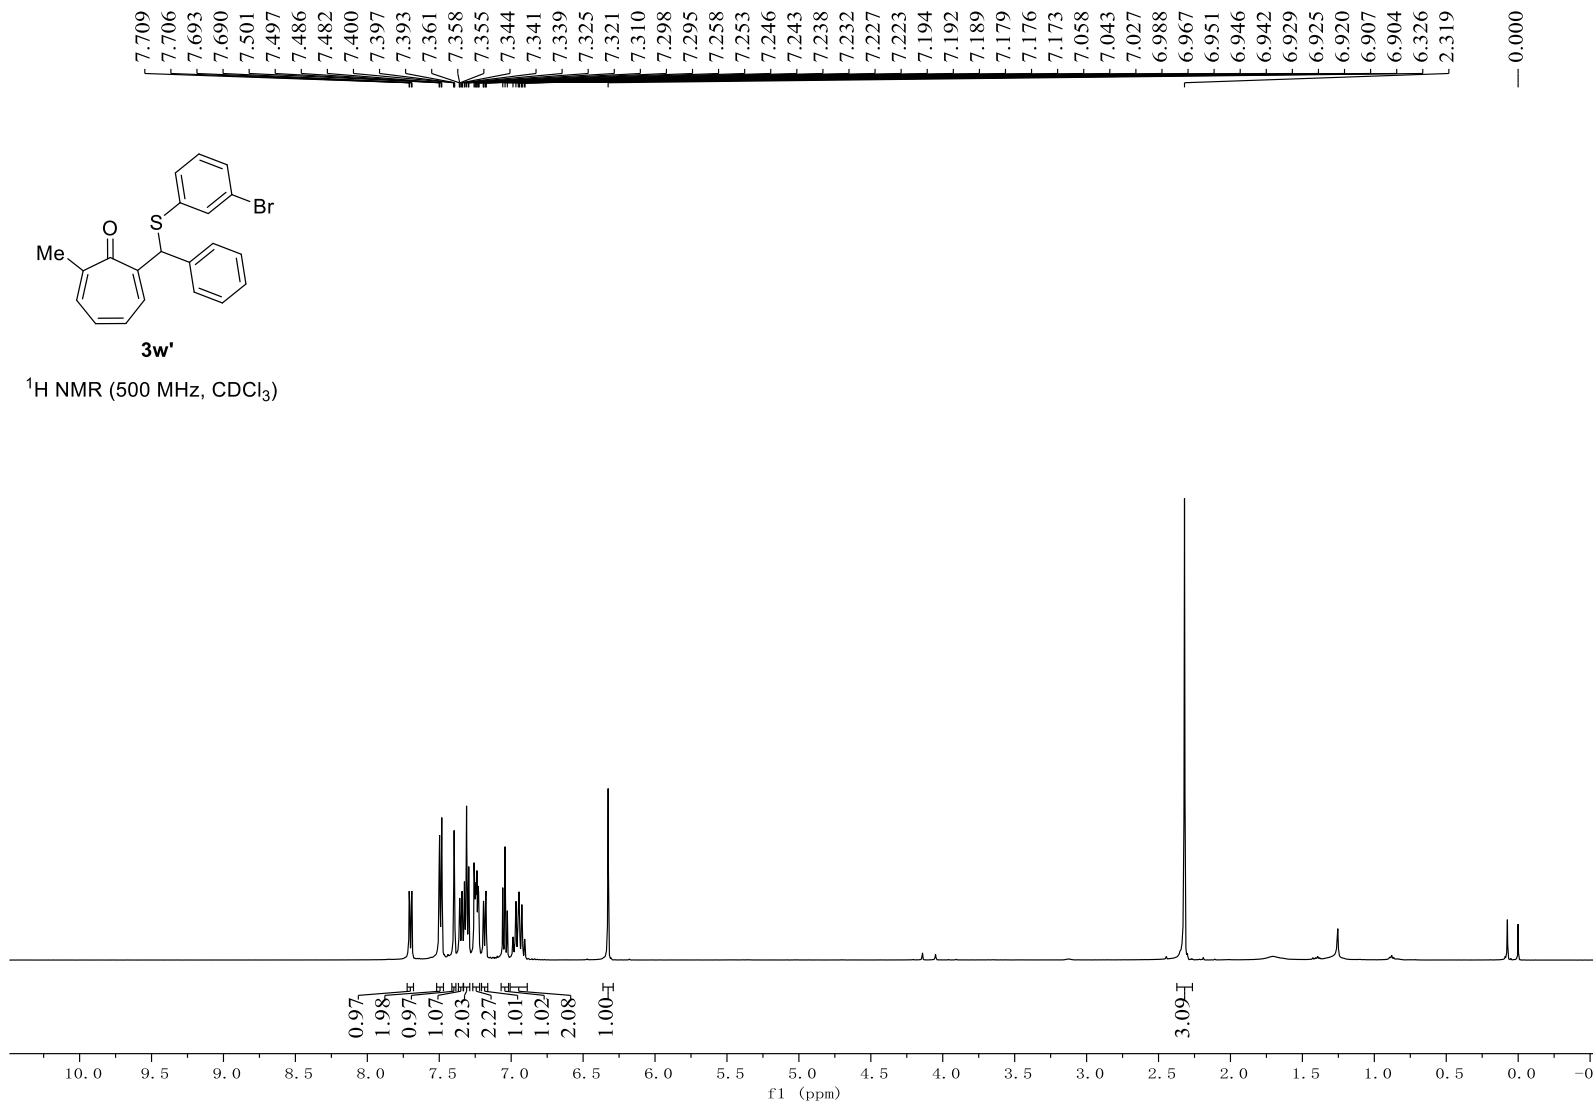

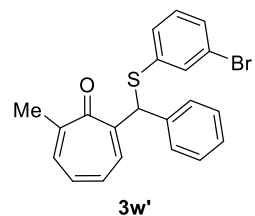

3w'

$^{13}\text{C}$  NMR (125 MHz,  $\text{CDCl}_3$ )

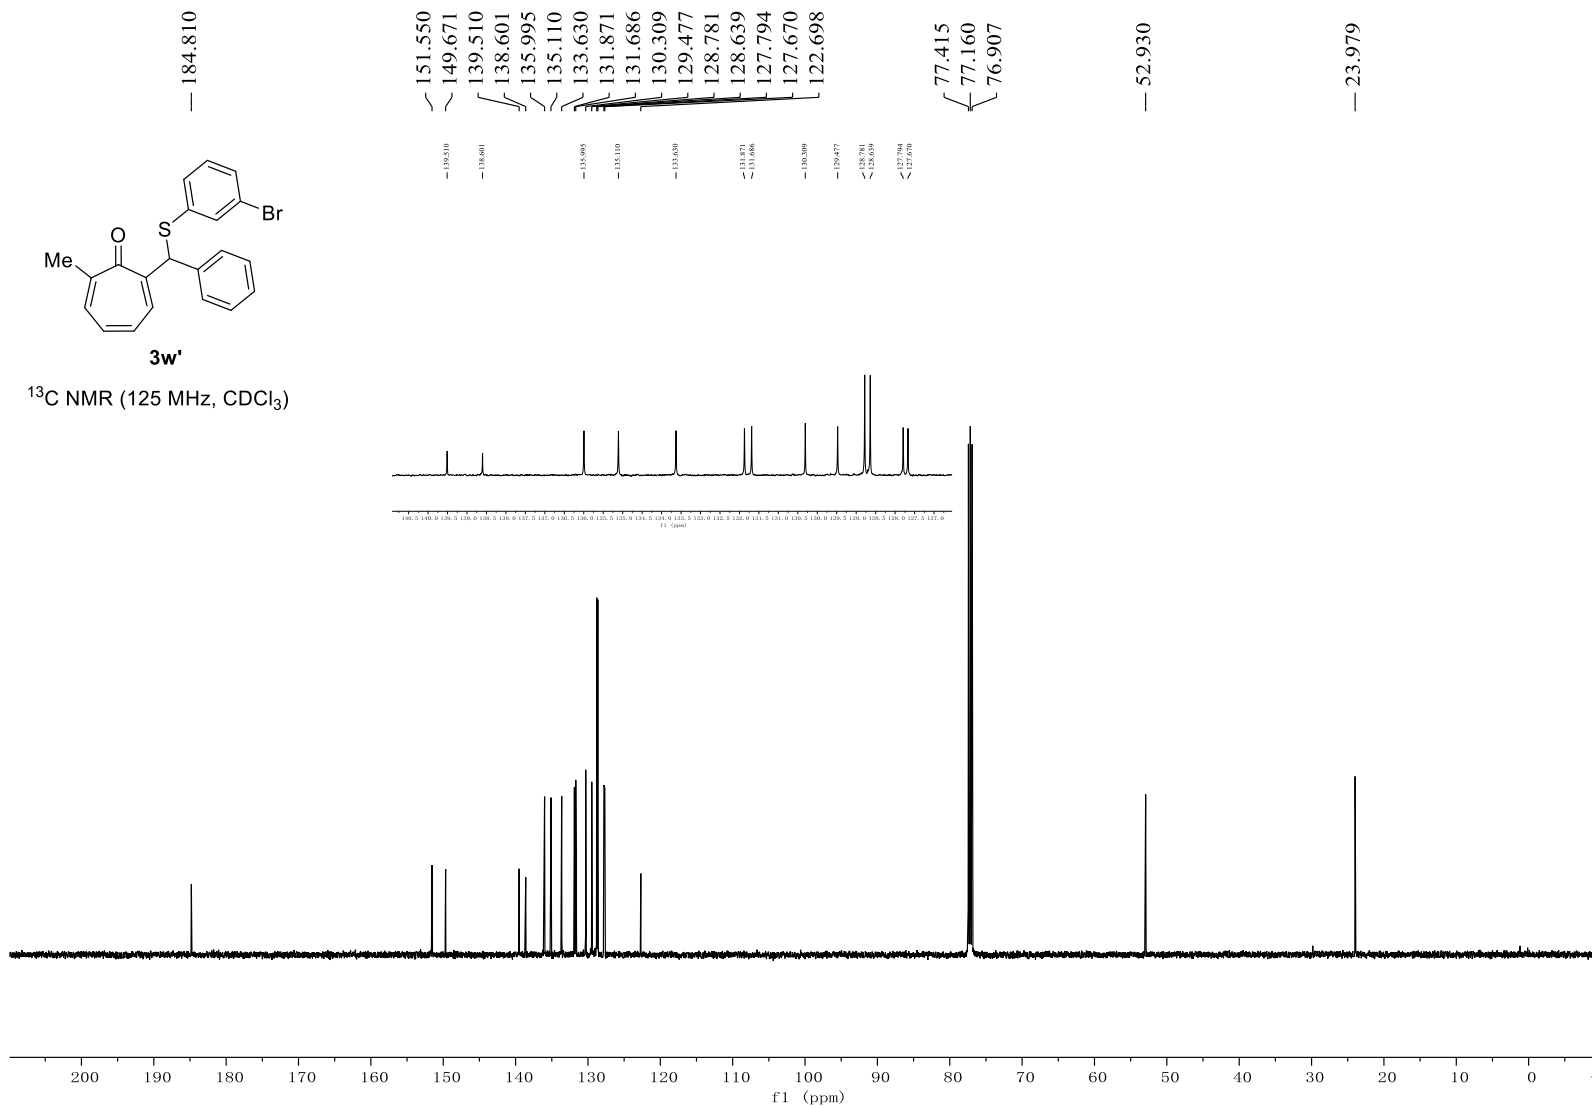

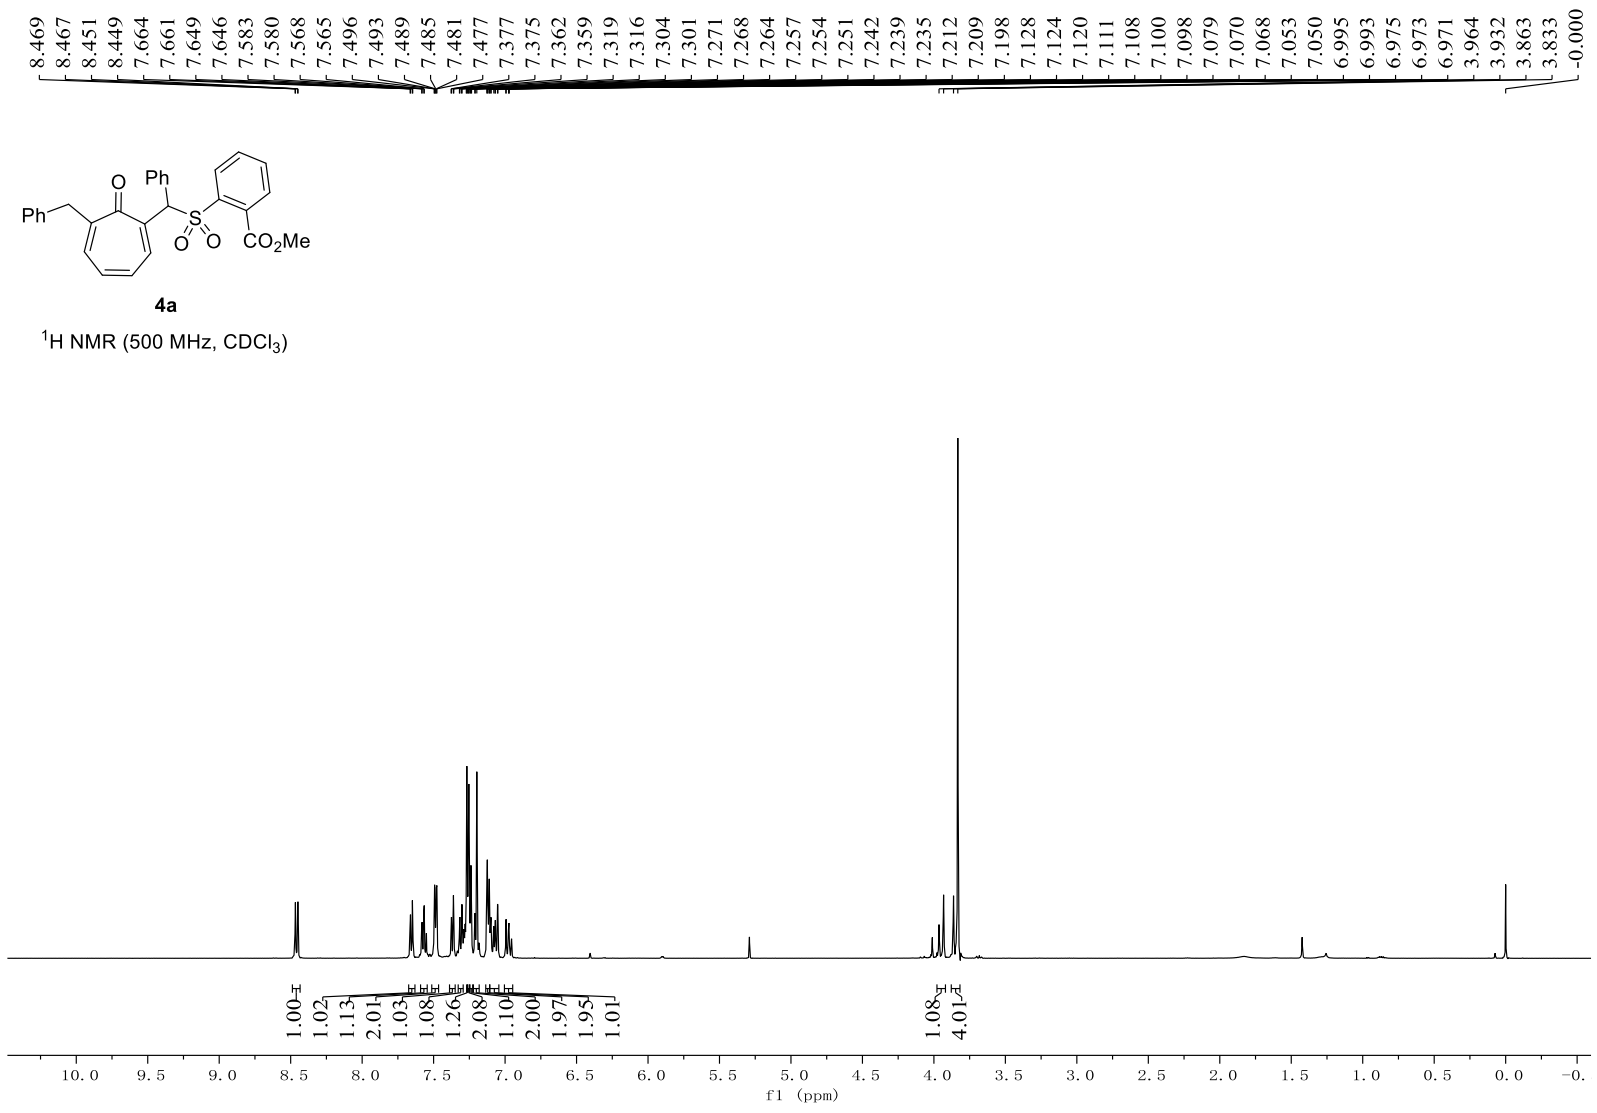

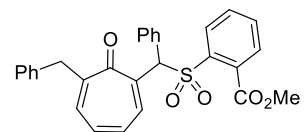

**4a**

$^{13}\text{C}$  NMR (125 MHz,  $\text{CDCl}_3$ )

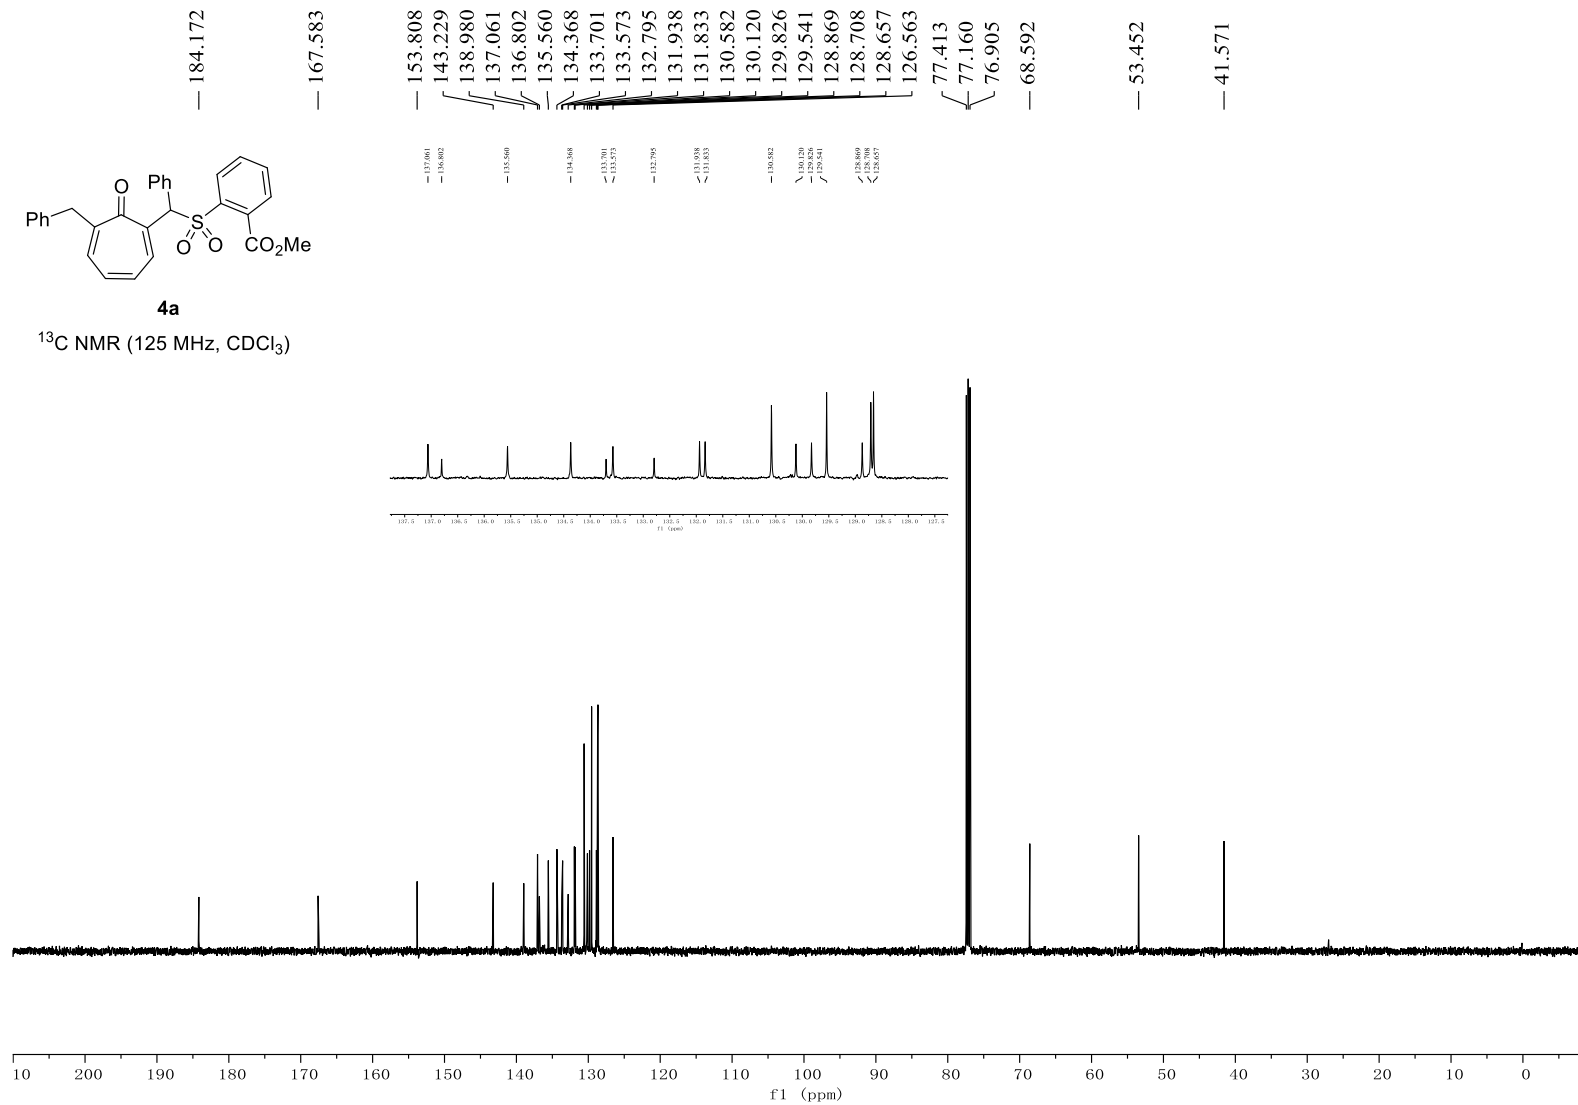

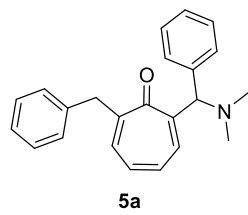

<sup>1</sup>H NMR (500 MHz, CDCl<sub>3</sub>)

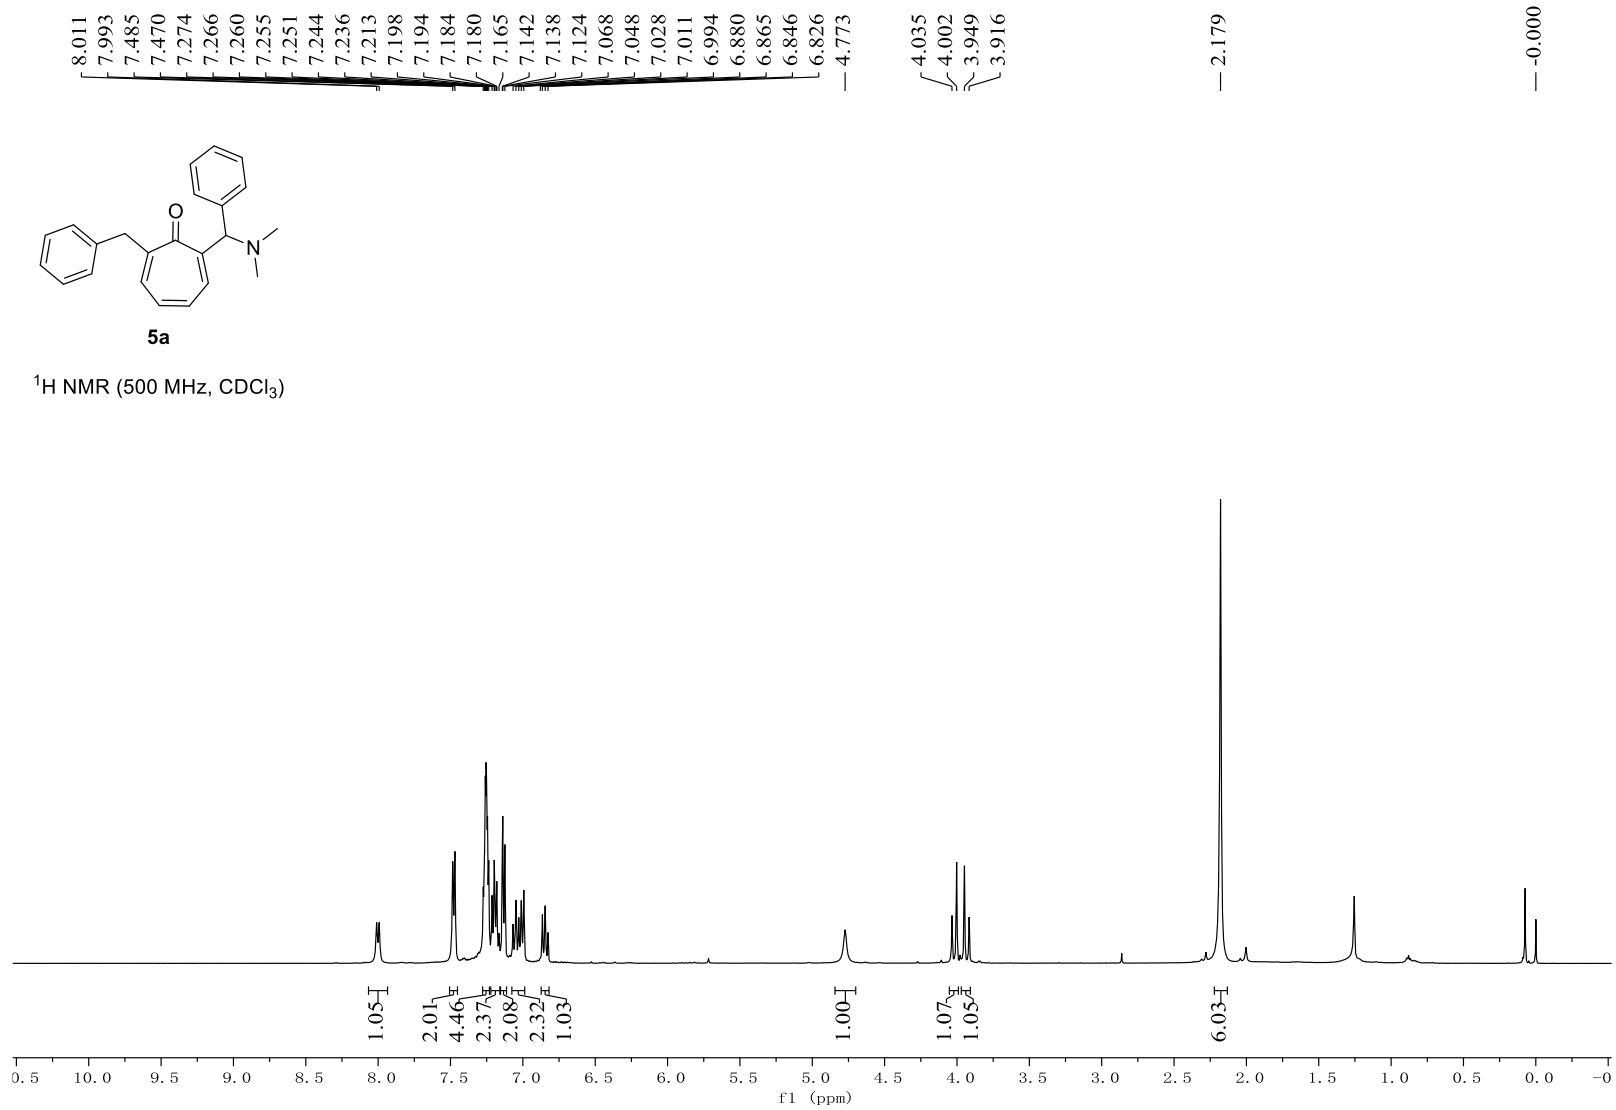



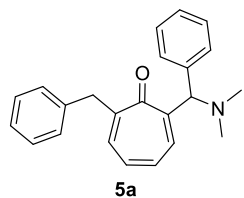

$^{13}\text{C}$  NMR (125 MHz,  $\text{CDCl}_3$ )

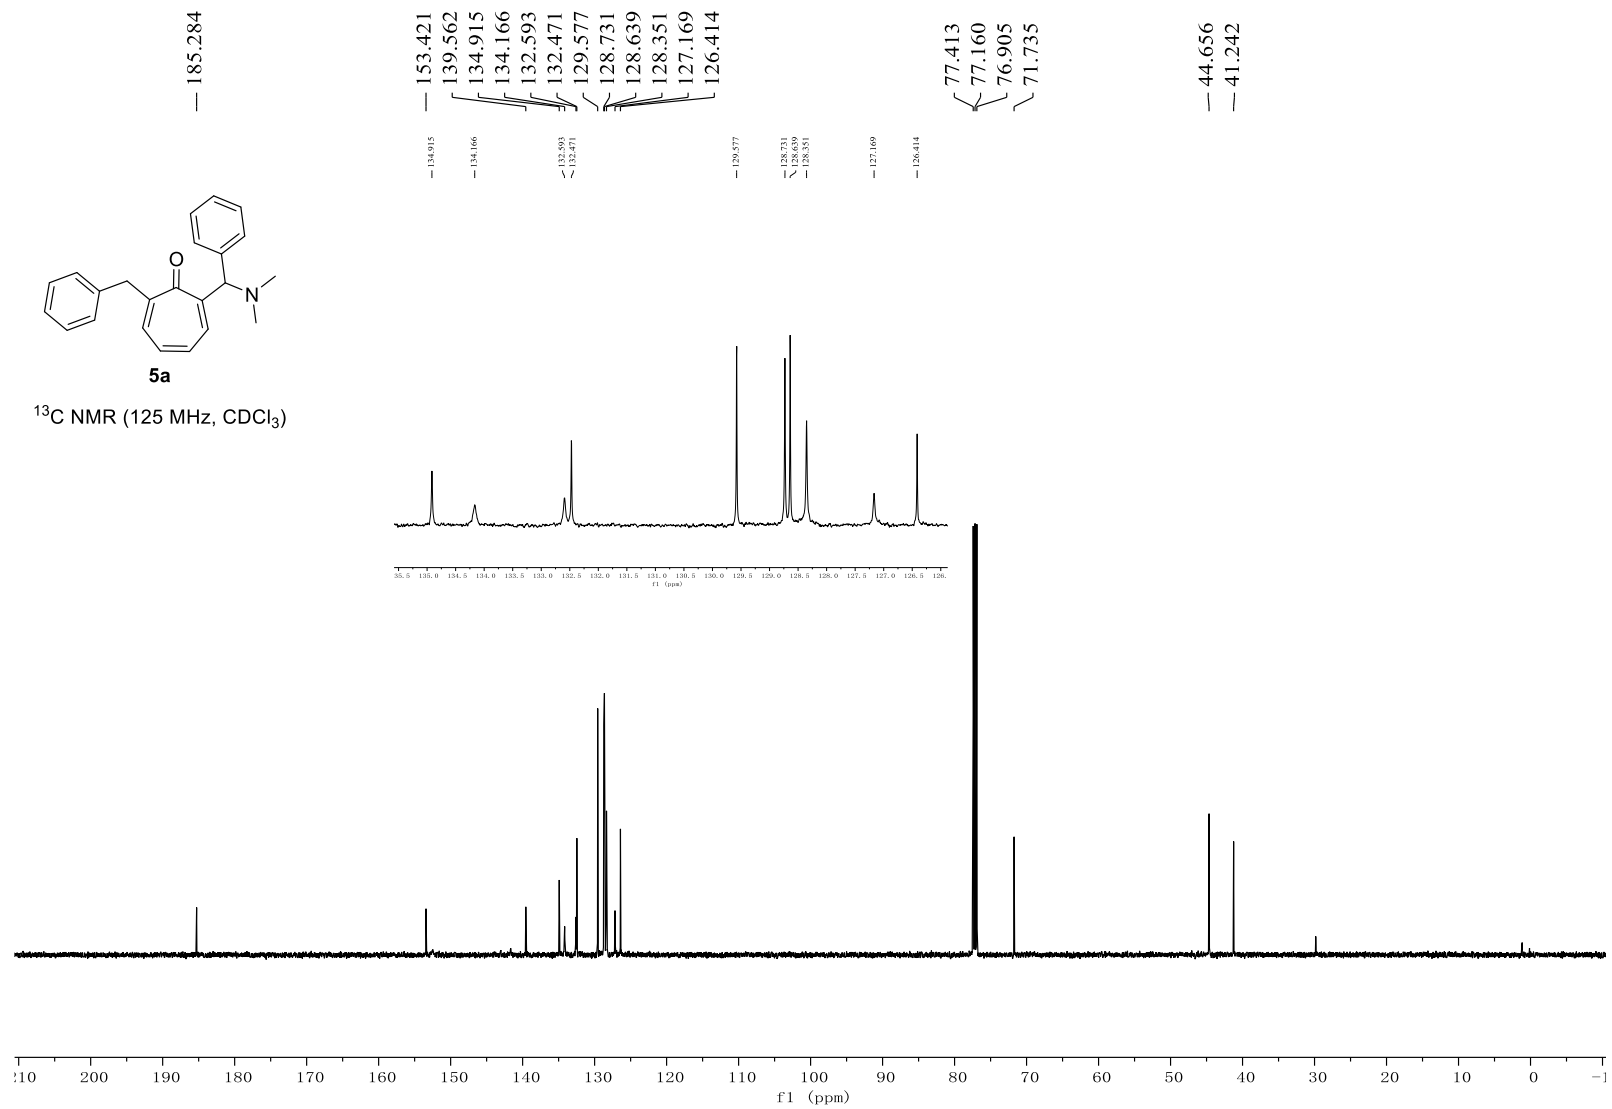

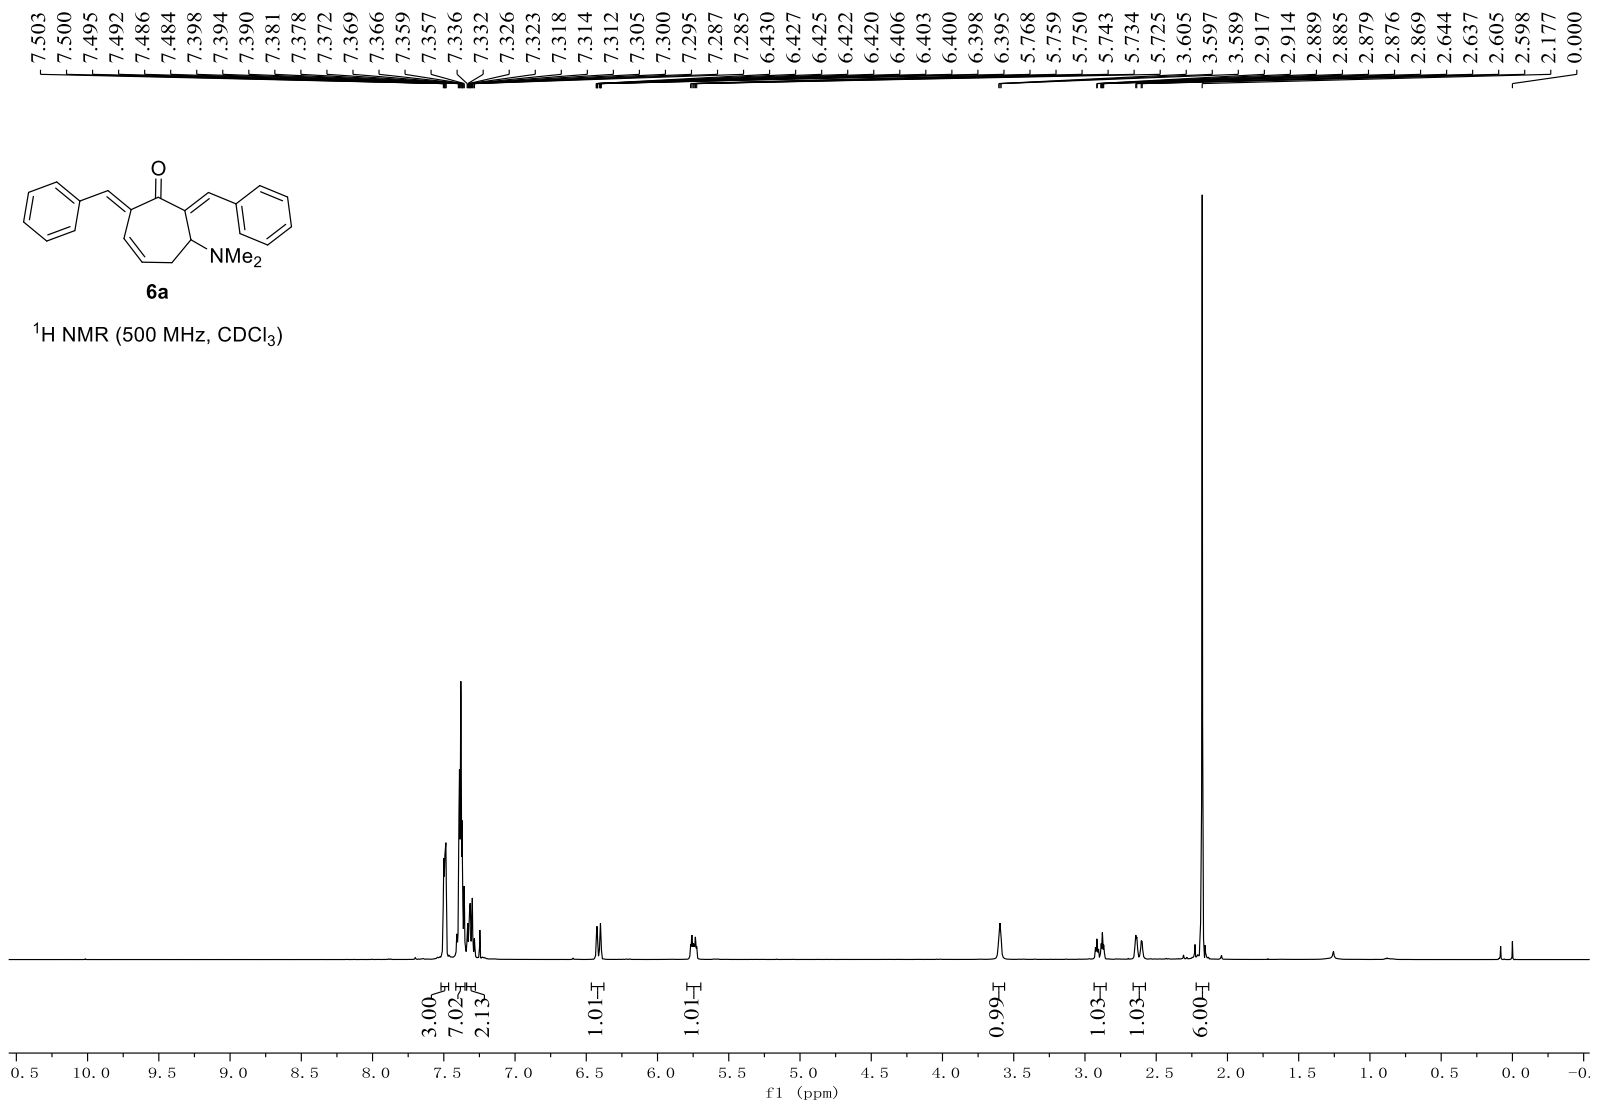

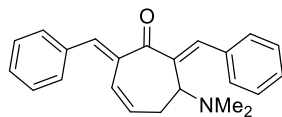

**6a**

<sup>13</sup>C NMR (125 MHz, CDCl<sub>3</sub>)

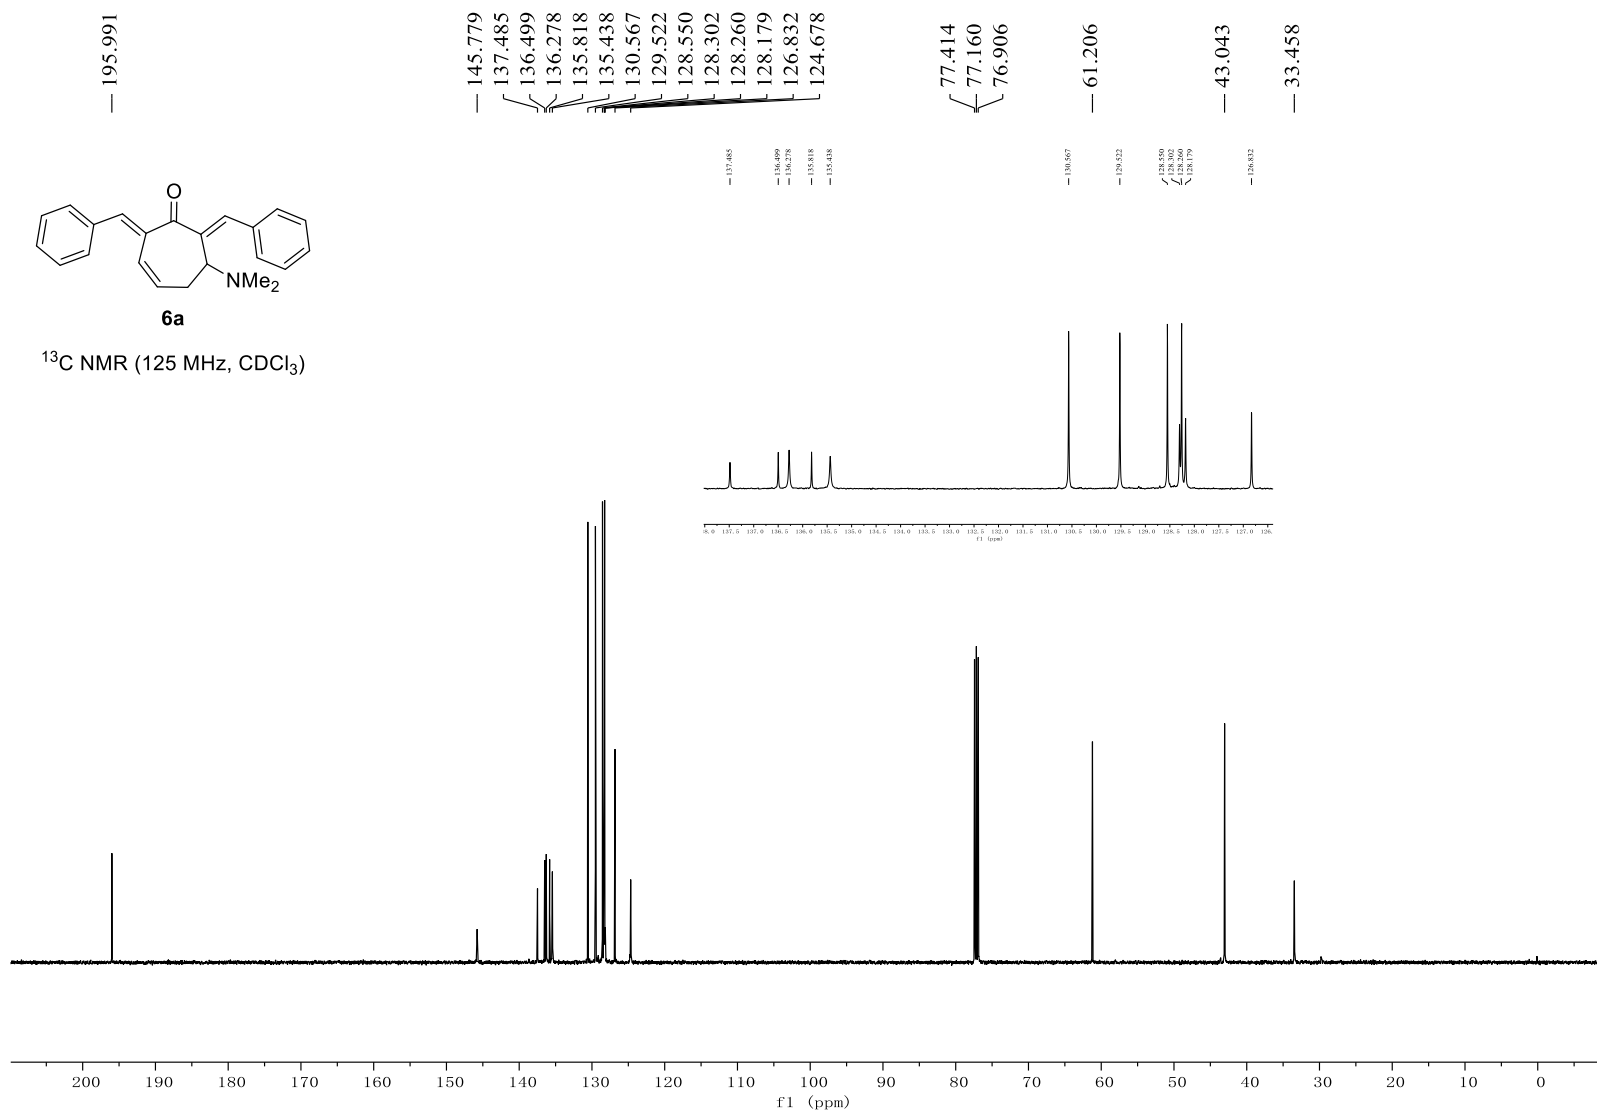

7.803  
7.663  
7.658  
7.648  
7.644  
7.521  
7.516  
7.510  
7.507  
7.500  
7.497  
7.483  
7.480  
7.467  
7.426  
7.405  
7.402  
7.388  
7.389  
6.782  
6.761  
6.376  
6.362  
6.356  
6.348  
6.341  
6.327  
5.553  
5.339  
5.330  
5.316

2.947  
2.935  
2.930  
2.911  
2.883

— 0.000

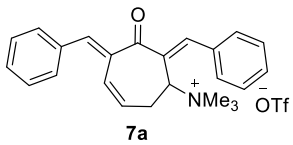

<sup>1</sup>H NMR (500 MHz, DMSO-d<sub>6</sub>)

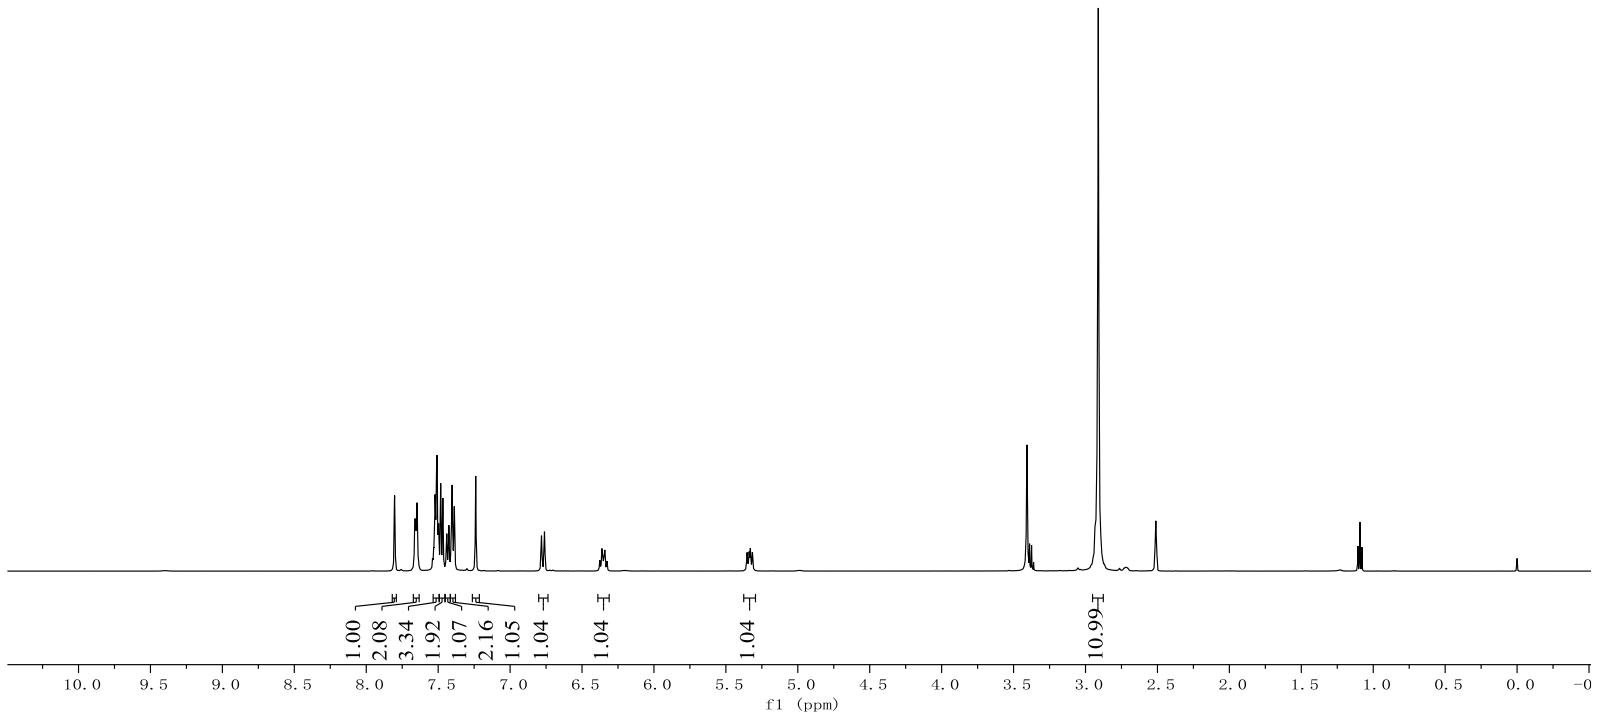

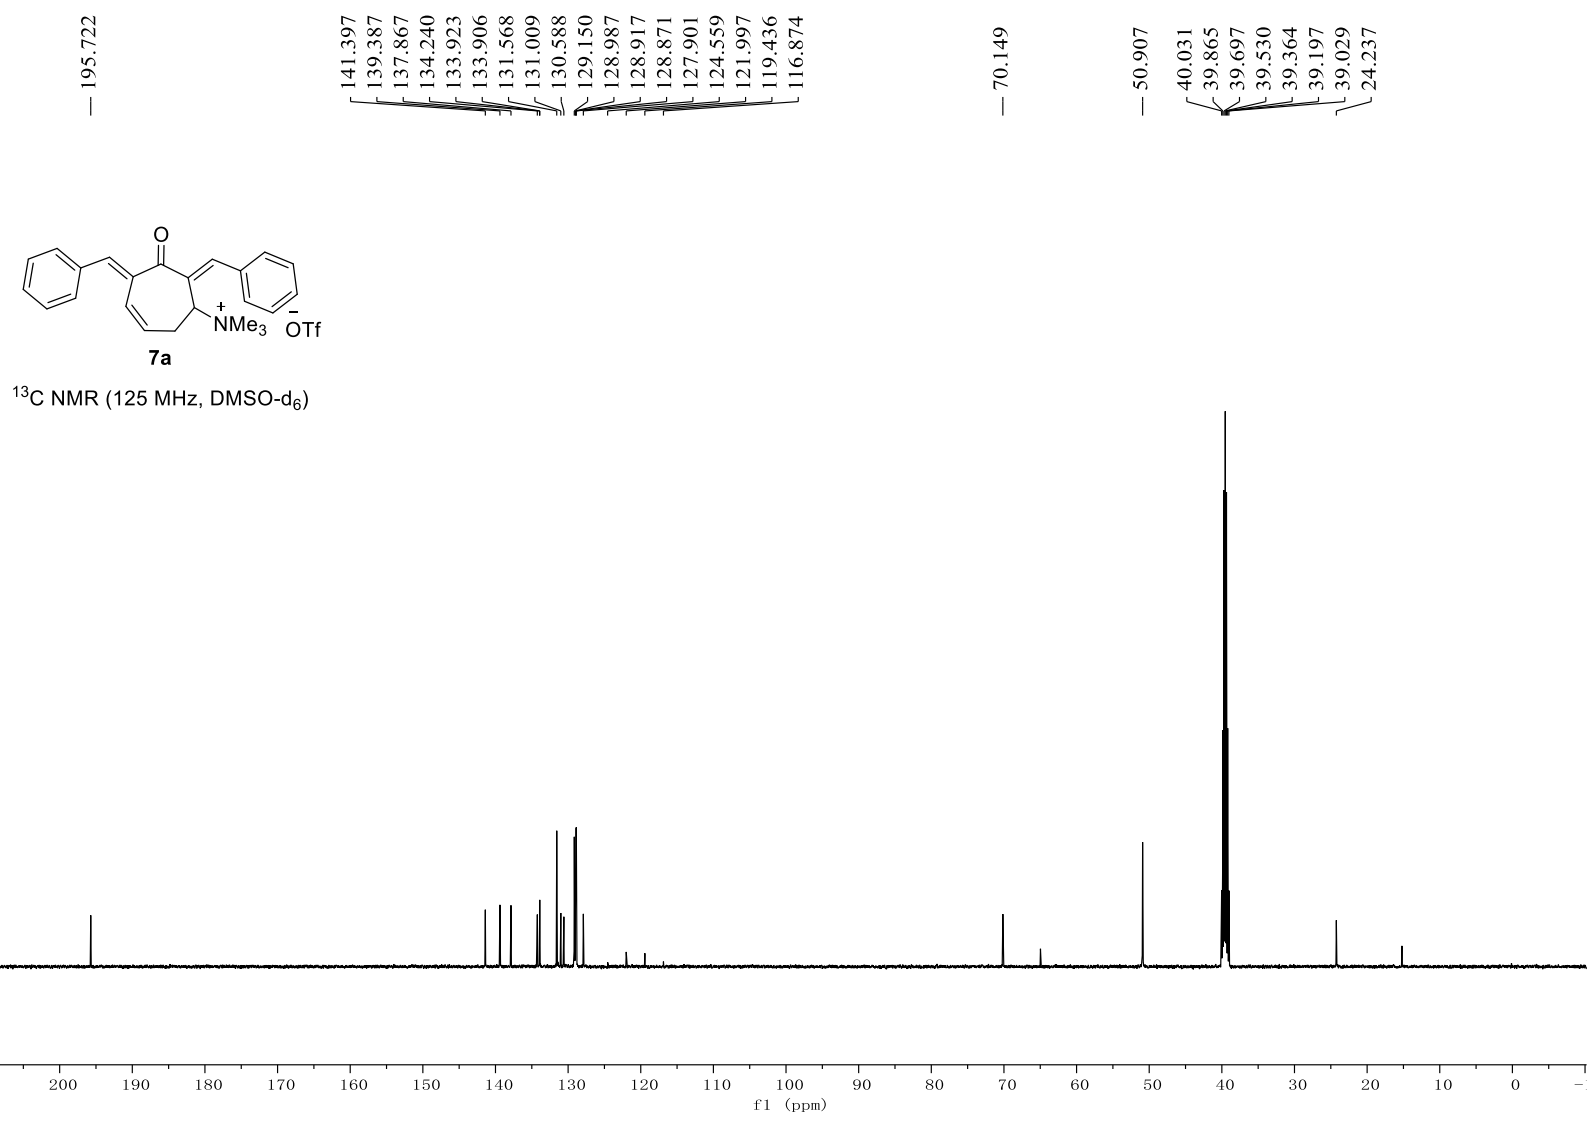

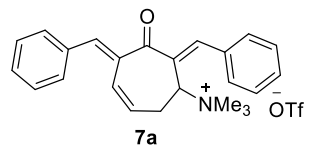

<sup>19</sup>F NMR (471 MHz, DMSO-d<sub>6</sub>)

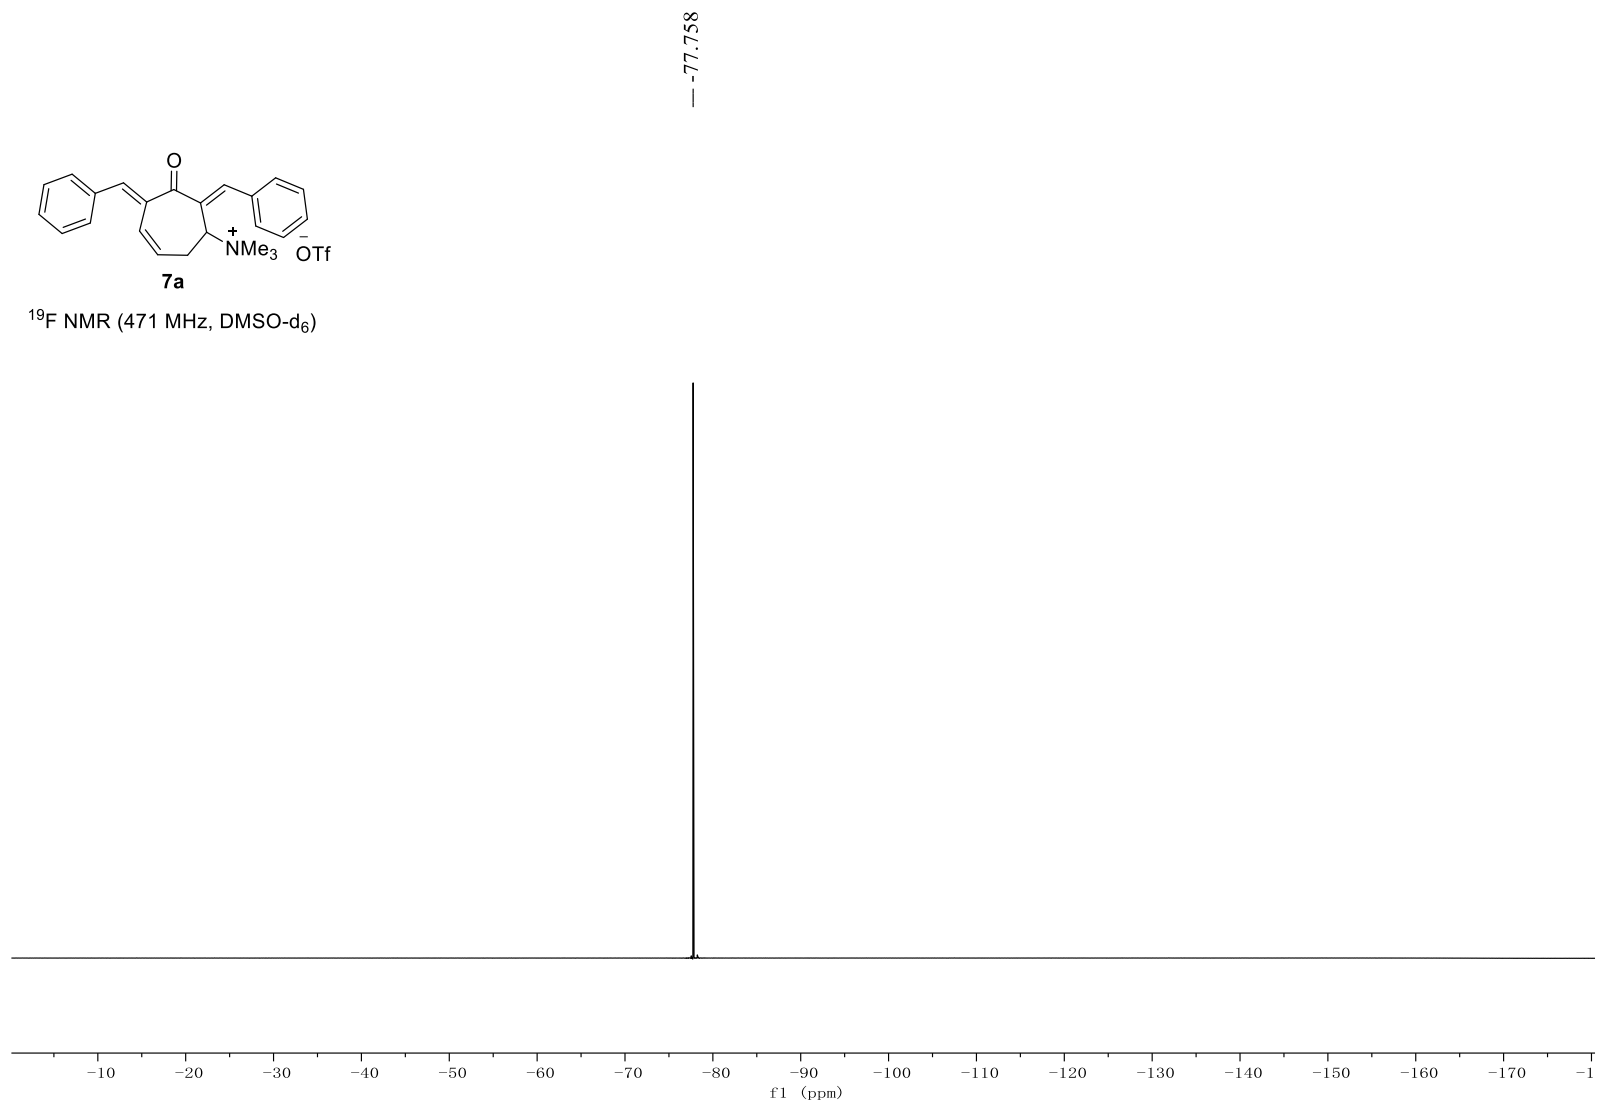

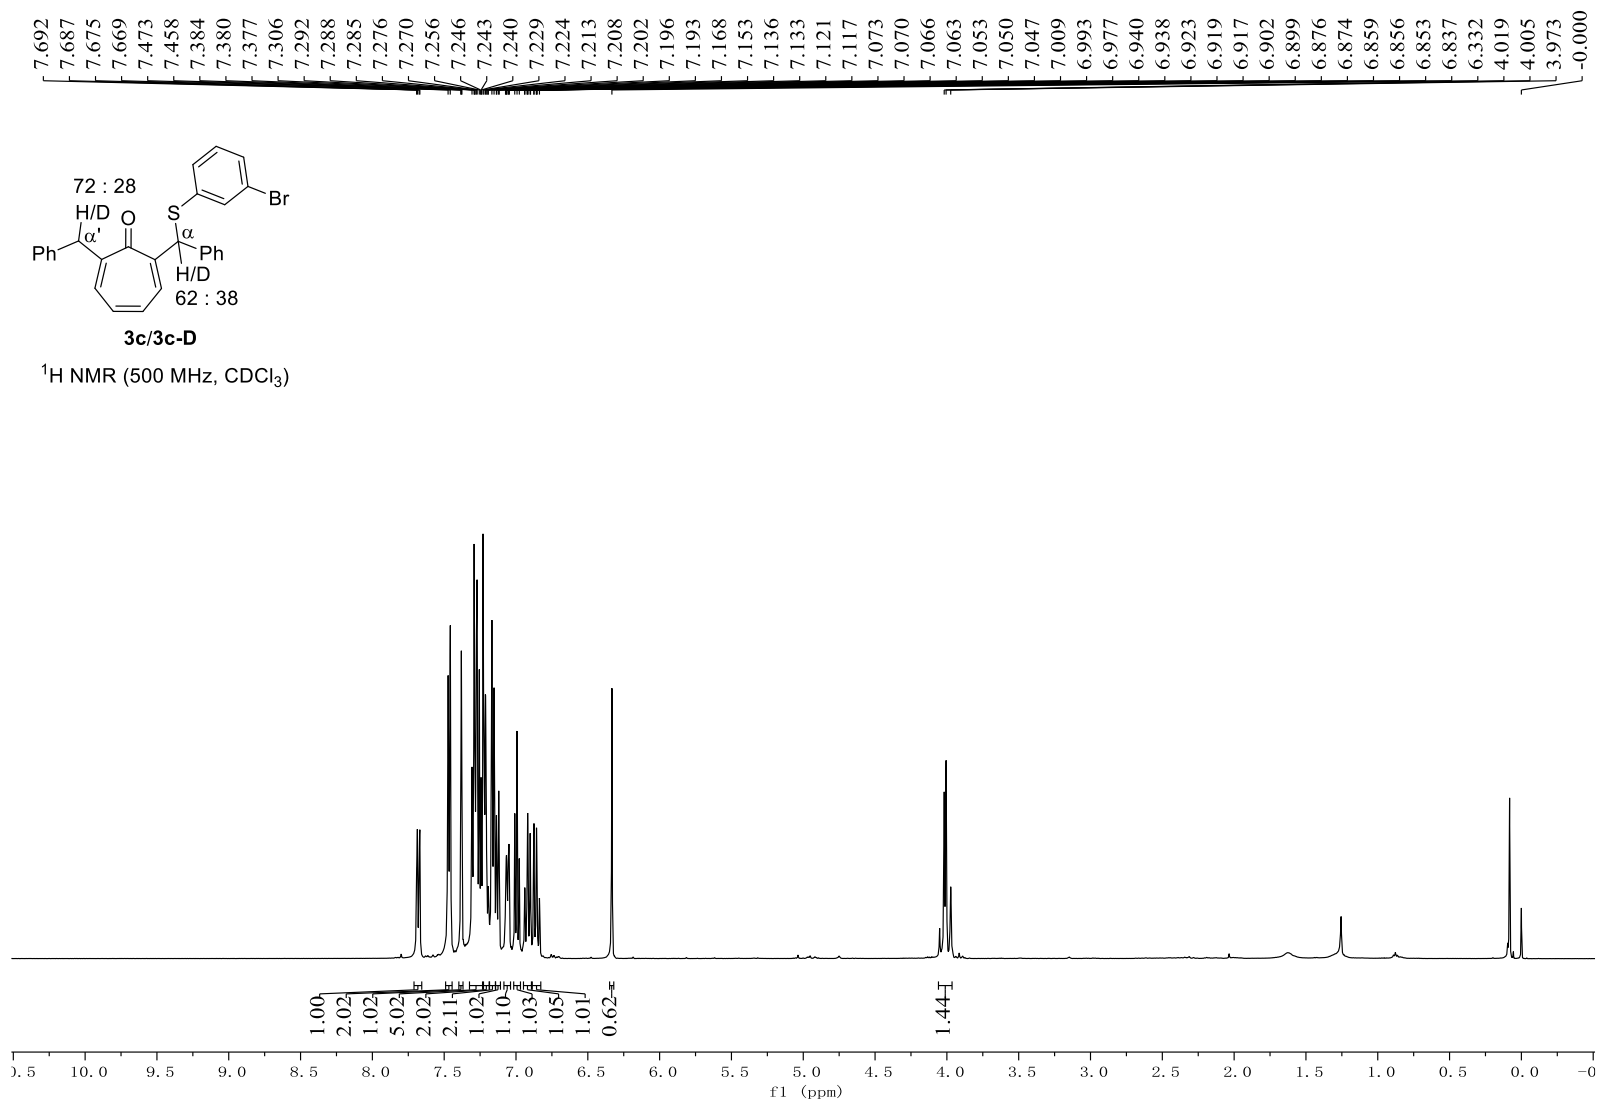

7.697  
7.695  
7.680  
7.678  
7.469  
7.466  
7.454  
7.451  
7.308  
7.307  
7.304  
7.300  
7.290  
7.279  
7.275  
7.268  
7.264  
7.255  
7.251  
7.246  
7.242  
7.233  
7.228  
7.223  
7.219  
7.214  
7.207  
7.204  
7.201  
7.165  
7.162  
7.148  
7.103  
7.097  
7.093  
7.084  
7.080  
7.062  
7.060  
6.948  
6.946  
6.931  
6.927  
6.925  
6.910  
6.907  
6.886  
6.884  
6.869  
6.867  
6.862  
6.847  
6.300  
4.056  
4.025  
3.988  
3.956  
— 0.000

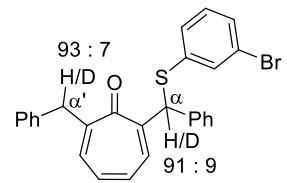

**3c/3c-D**

<sup>1</sup>H NMR (500 MHz, CDCl<sub>3</sub>)

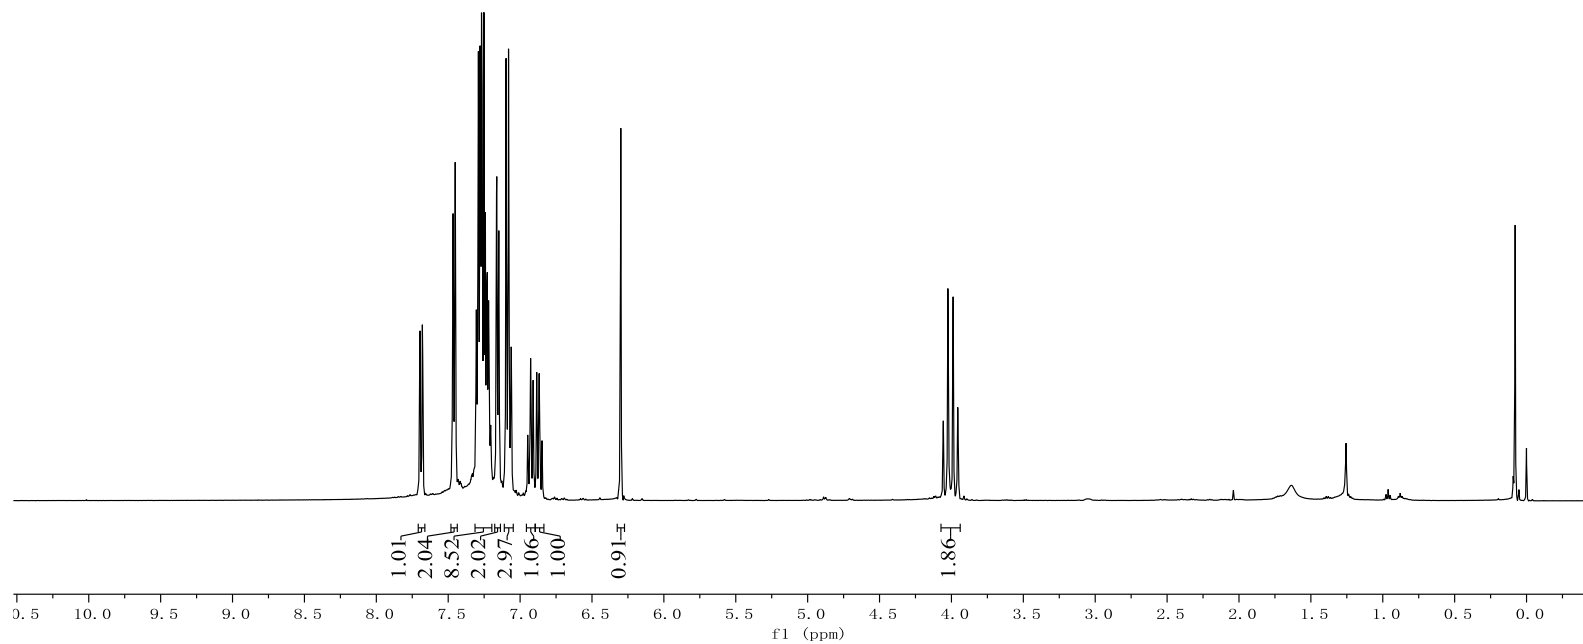

Supplement: d3ob01835k1.pdf [file d3ob01835k1.pdf]
